# Supplementary material
Source: Research Square preprint supplement (doi:10.21203/rs.3.rs-8978267/v1)
Supplement: Supplementary file 1 [file 6552e192a3a174d46d6b3931.xlsx]

## Sheet: SOD1_Variants
#chr	pos	variation	variant_type	snp_id	clinical_significance	validation_status	function_class	gene	frequency
21	31667849	C>T	snv	1041740	benign	by-frequency;by-alfa;by-cluster	intron_variant	SOD1	T:0.242812:1216:1000Genomes|T:0.241412:1546:1000Genomes_30X|T:0.290088:1118:ALSPAC|T:0.23817:1067:Estonian|T:0.275:11:GENOME_DK|T:0.246683:36779:GnomAD_genomes|T:0.292585:292:GoNL|T:0.292553:605:HGDP_Stanford|T:0.23464:443:HapMap|T:0.385666:1130:KOREAN|T:0.385371:706:Korea1K|T:0.376659:2724:Korea4K|T:0.253333:152:NorthernSweden|T:0.20894:16411:PAGE_STUDY|T:0.333333:28:PRJEB36033|T:0.407828:323:PR…
21	31668580	C>G,T	snv	1804447	benign;likely-benign	by-frequency;by-alfa;by-cluster	3_prime_UTR_variant	SOD1	T:0.001398:7:1000Genomes|T:0.001405:9:1000Genomes_30X|T:0.002331:348:GnomAD_genomes|T:0.00223:29:GoESP|T:0.004143:326:PAGE_STUDY|T:0.002618:693:TOPMED|T:0.000371:80:ALFA
21	31668533	C>A,T	snv	1804449	conflicting-interpretations-of-pathogenicity;likely-benign;pathogenic	by-frequency;by-alfa;by-cluster	synonymous_variant;coding_sequence_variant;missense_variant	SOD1	T:0.0002:1:1000Genomes|T:0.000156:1:1000Genomes_30X|T:0.000107:13:ExAC|T:0.000074:11:GnomAD_genomes|T:0.000258:20:TOMMO|T:0.000079:21:TOPMED|T:0.000027:2:ALFA
21	31667007	A>C,G,T	snv	2070424	benign	by-frequency;by-alfa;by-cluster	intron_variant	SOD1	G:0.248403:1244:1000Genomes|G:0.241255:1545:1000Genomes_30X|G:0.064608:249:ALSPAC|G:0.065402:293:Estonian|G:0.125:5:GENOME_DK|G:0.134254:20028:GnomAD_genomes|G:0.064128:64:GoNL|G:0.231707:437:HapMap|T:0.:0:KOREAN|A:0.499585:3612:Korea4K|G:0.076667:46:NorthernSweden|G:0.421519:333:PRJEB37584|G:0.092593:20:Qatari|A:0.372:93:SGDP_PRJ|A:0.444444:8:Siberian|A:0.482643:37373:TOMMO|G:0.146689:38827:TOPM…
21	31666552	A>C	snv	2234694	benign	by-frequency;by-alfa;by-cluster	intron_variant	SOD1	C:0.0161741:81:1000Genomes|C:0.0151468:97:1000Genomes_30X|C:0.0443695:171:ALSPAC|C:0.0662946:297:Estonian|C:0.0385747:3984:ExAC|C:0.0400993:50454:GnomAD_exomes|C:0.0334334:4990:GnomAD_genomes|C:0.0322159:419:GoESP|C:0.0511022:51:GoNL|C:0.0243446:13:MGP|C:0.0583333:35:NorthernSweden|C:0.0046296:1:Qatari|A:0.4375:7:SGDP_PRJ|A:0.5:2:Siberian|C:0.027111:7176:TOPMED|C:0.0409924:152:TWINSUK|C:0.0046296…
21	31668058	C>T	snv	4817420	benign	by-frequency;by-alfa;by-cluster	intron_variant	SOD1	T:0.242812:1216:1000Genomes|T:0.241412:1546:1000Genomes_30X|T:0.288012:1110:ALSPAC|T:0.40388:458:Daghestan|T:0.237946:1066:Estonian|T:0.275:11:GENOME_DK|T:0.246749:36735:GnomAD_genomes|T:0.292585:292:GoNL|T:0.237687:444:HapMap|T:0.384983:1128:KOREAN|T:0.385371:706:Korea1K|T:0.377593:2730:Korea4K|T:0.253333:152:NorthernSweden|T:0.430556:93:Qatari|C:0.402778:87:SGDP_PRJ|C:0.428571:18:Siberian|T:0.3…
21	31659661	A>C,G	snv	7277748	benign	by-frequency;by-alfa;by-cluster	2KB_upstream_variant;upstream_transcript_variant	SOD1	G:0.039337:197:1000Genomes|G:0.042161:270:1000Genomes_30X|G:0.000259:1:ALSPAC|G:0.116456:92:HapMap|G:0.062619:4928:PAGE_STUDY|G:0.013889:3:Qatari|A:0.4:12:SGDP_PRJ|G:0.04282:11334:TOPMED|G:0.00027:1:TWINSUK|G:0.007694:383:ALFA
21	31664078	T>C,G	snv	10432782	benign	by-frequency;by-alfa;by-cluster	intron_variant;2KB_upstream_variant;upstream_transcript_variant	SOD1;LOC124900469	G:0.294928:1477:1000Genomes|G:0.288726:1849:1000Genomes_30X|G:0.109237:421:ALSPAC|G:0.131473:589:Estonian|G:0.125:5:GENOME_DK|G:0.194554:29001:GnomAD_genomes|G:0.11523:115:GoNL|G:0.245399:80:HapMap|T:0.495904:1453:KOREAN|T:0.49599:3587:Korea4K|G:0.135:81:NorthernSweden|G:0.101852:22:Qatari|T:0.35461:100:SGDP_PRJ|T:0.454545:10:Siberian|T:0.483291:37428:TOMMO|G:0.204186:54046:TOPMED|G:0.104639:388:…
21	31668014	T>-,TT	delins	11307260	benign	by-frequency;by-alfa;by-cluster	intron_variant	SOD1	T:0.419129:2099:1000Genomes|T:0.422861:2708:1000Genomes_30X|-:0.398547:1536:ALSPAC|-:0.369643:1656:Estonian|-:0.4:16:GENOME_DK|-:0.483493:71995:GnomAD_genomes|-:0.408818:408:GoNL|T:0.115906:838:Korea4K|-:0.388333:233:NorthernSweden|T:0.153819:11897:TOMMO|T:0.498848:132040:TOPMED|-:0.403182:1495:TWINSUK|TT:0.436987:8093:ALFA
21	31667278	A>G,T	snv	11556620	pathogenic	by-frequency;by-alfa;by-cluster	coding_sequence_variant;missense_variant	SOD1	G:0.0000014:2:GnomAD_exomes|G:0.0000387:3:TOMMO|G:0.:0:ALFA
21	31659715	C>A,G,T	snv	16988395	uncertain-significance	by-frequency;by-alfa;by-cluster	5_prime_UTR_variant	SOD1	T:0.00052:2:ALSPAC|T:0.00103:3:KOREAN|T:0.00056:1:Korea1K|T:0.:0:TWINSUK|T:0.00007:1:ALFA
21	31663682	T>A,G	snv	16988404	benign	by-frequency;by-alfa;by-cluster	intron_variant;2KB_upstream_variant;upstream_transcript_variant	SOD1;LOC124900469	A:0.016174:81:1000Genomes|A:0.015147:97:1000Genomes_30X|A:0.043851:169:ALSPAC|A:0.066295:297:Estonian|A:0.033425:4988:GnomAD_genomes|A:0.051102:51:GoNL|A:0.007491:4:MGP|A:0.058333:35:NorthernSweden|A:0.00463:1:Qatari|T:0.4375:7:SGDP_PRJ|T:0.5:2:Siberian|A:0.040992:152:TWINSUK|A:0.00463:1:Vietnamese|A:0.017399:313:ALFA
21	31659614	G>A,C	snv	17878855	likely-benign	by-frequency;by-alfa;by-cluster	2KB_upstream_variant;upstream_transcript_variant	SOD1	C:0.007788:39:1000Genomes|C:0.00812:52:1000Genomes_30X|C:0.007066:1055:GnomAD_genomes|G:0.5:3:SGDP_PRJ|C:0.008319:2202:TOPMED|C:0.00638:92:ALFA
21	31668917	C>A,T	snv	17880487	benign	by-frequency;by-alfa;by-cluster	3_prime_UTR_variant	SOD1	T:0.014177:71:1000Genomes|T:0.013429:86:1000Genomes_30X|T:0.000446:2:Estonian|T:0.003465:517:GnomAD_genomes|T:0.038043:35:HapMap|T:0.101365:297:KOREAN|T:0.092249:169:Korea1K|T:0.095712:692:Korea4K|C:0.5:11:SGDP_PRJ|C:0.5:2:Siberian|T:0.090511:6999:TOMMO|T:0.00572:1514:TOPMED|T:0.042056:9:Vietnamese|T:0.001879:297:ALFA
21	31659974	C>T	snv	17881180	benign	by-frequency;by-alfa;by-cluster	intron_variant	SOD1	T:0.027356:137:1000Genomes|T:0.025453:163:1000Genomes_30X|T:0.059419:229:ALSPAC|T:0.066741:299:Estonian|T:0.05:2:GENOME_DK|T:0.049876:31519:GnomAD_exomes|T:0.038109:5677:GnomAD_genomes|T:0.000694:2:KOREAN|T:0.000279:2:Korea4K|T:0.075:45:NorthernSweden|T:0.032407:7:Qatari|C:0.5:17:SGDP_PRJ|C:0.5:3:Siberian|T:0.000077:6:TOMMO|T:0.034463:9122:TOPMED|T:0.050162:186:TWINSUK|T:0.050026:945:ALFA
21	31667844	C>A,G,T	snv	17881732	likely-benign	by-frequency;by-alfa;by-cluster	intron_variant	SOD1	A:0.01058:53:1000Genomes|A:0.01031:66:1000Genomes_30X|A:0.02387:92:ALSPAC|A:0.00968:11:Daghestan|A:0.0058:26:Estonian|A:0.01303:13:GoNL|A:0.005:3:NorthernSweden|A:0.01496:1177:PAGE_STUDY|A:0.00463:1:Qatari|C:0.5:6:SGDP_PRJ|A:0.02023:75:TWINSUK|T:0.:0:ALFA
21	31667691	T>G	snv	17883234	benign	by-frequency;by-alfa;by-cluster	intron_variant	SOD1	G:0.034545:173:1000Genomes|G:0.038413:246:1000Genomes_30X|G:0.000259:1:ALSPAC|G:0.031949:4769:GnomAD_genomes|G:0.001002:1:GoNL|G:0.013889:3:Qatari|T:0.5:8:SGDP_PRJ|G:0.035902:9503:TOPMED|G:0.000809:3:TWINSUK|G:0.02845:348:ALFA
21	31659509	G>T	snv	17883296	likely-benign	by-frequency;by-alfa;by-cluster	2KB_upstream_variant;upstream_transcript_variant	SOD1	T:0.007388:37:1000Genomes|T:0.007651:49:1000Genomes_30X|T:0.000259:1:ALSPAC|T:0.000736:272:GnomAD_exomes|T:0.006696:1000:GnomAD_genomes|G:0.5:1:SGDP_PRJ|T:0.00799:2115:TOPMED|T:0.:0:TWINSUK|T:0.004577:66:ALFA
21	31663650	G>A,C	snv	17884233	benign	by-frequency;by-alfa;by-cluster	intron_variant;2KB_upstream_variant;upstream_transcript_variant	SOD1;LOC124900469	C:0.025559:128:1000Genomes|C:0.029044:186:1000Genomes_30X|C:0.:0:ALSPAC|C:0.023406:3494:GnomAD_genomes|C:0.013889:3:Qatari|G:0.5:5:SGDP_PRJ|C:0.025842:6840:TOPMED|C:0.000809:3:TWINSUK|C:0.017129:247:ALFA
21	31666163	AG>-	del	17884464	benign	by-frequency;by-alfa;by-cluster	intron_variant	SOD1	-:0.016374:82:1000Genomes|-:0.015147:97:1000Genomes_30X|-:0.044629:172:ALSPAC|-:0.066295:297:Estonian|-:0.033443:4982:GnomAD_genomes|-:0.051102:51:GoNL|-:0.058333:35:NorthernSweden|-:0.027092:7171:TOPMED|-:0.041262:153:TWINSUK|-:0.043143:799:ALFA
21	31666761	A>G	snv	17885634	benign	by-frequency;by-alfa;by-cluster	intron_variant	SOD1	G:0.029752:149:1000Genomes|G:0.031699:203:1000Genomes_30X|G:0.003244:1207:GnomAD_exomes|G:0.026661:3978:GnomAD_genomes|G:0.00463:1:Qatari|A:0.307692:8:SGDP_PRJ|G:0.030383:8042:TOPMED|G:0.021151:305:ALFA
21	31666429	T>C	snv	17885833	benign	by-frequency;by-alfa;by-cluster	intron_variant	SOD1	C:0.0075879:38:1000Genomes|C:0.0079638:51:1000Genomes_30X|C:0.0025584:222:ExAC|C:0.0007167:986:GnomAD_exomes|C:0.0067653:1010:GnomAD_genomes|C:0.0068462:89:GoESP|C:0.001002:1:GoNL|T:0.5:3:SGDP_PRJ|C:0.0000387:3:TOMMO|C:0.0079905:2115:TOPMED|C:0.0043451:103:ALFA
21	31667384	T>C,G	snv	17886692	benign;likely-benign	by-frequency;by-alfa;by-cluster	intron_variant	SOD1	C:0.000599:3:1000Genomes|C:0.0006246:4:1000Genomes_30X|C:0.0001071:13:ExAC|C:0.0000367:50:GnomAD_exomes|C:0.0004754:71:GnomAD_genomes|C:0.0003076:4:GoESP|C:0.0004609:122:TOPMED|C:0.0000804:5:ALFA
21	31667356	T>C	snv	74315452	pathogenic	by-frequency;by-alfa;by-cluster	coding_sequence_variant;missense_variant	SOD1	C:0.:0:PAGE_STUDY|C:0.:0:ALFA
21	31667319	G>A,T	snv	76731700	pathogenic;likely-pathogenic	by-frequency;by-alfa;by-cluster	stop_gained;coding_sequence_variant;missense_variant	SOD1	A:0.:0:ALFA
21	31667604	C>T	snv	76734991	likely-benign	by-frequency;by-alfa;by-cluster	intron_variant	SOD1	T:0.004792:24:1000Genomes|T:0.005153:33:1000Genomes_30X|T:0.000259:1:ALSPAC|T:0.004397:656:GnomAD_genomes|C:0.5:2:SGDP_PRJ|T:0.005108:1352:TOPMED|T:0.:0:TWINSUK|T:0.003883:56:ALFA
21	31666726	G>A	snv	77319474	likely-benign	by-frequency;by-alfa;by-cluster	intron_variant	SOD1	A:0.005192:26:1000Genomes|A:0.005465:35:1000Genomes_30X|A:0.000524:224:GnomAD_exomes|A:0.00443:661:GnomAD_genomes|G:0.5:2:SGDP_PRJ|A:0.005142:1361:TOPMED|A:0.003883:56:ALFA
21	31667290	A>C,T	snv	80265967	conflicting-interpretations-of-pathogenicity;pathogenic;likely-pathogenic	by-frequency;by-alfa;by-cluster	coding_sequence_variant;missense_variant	SOD1	C:0.0003994:2:1000Genomes|C:0.0004685:3:1000Genomes_30X|C:0.0002595:1:ALSPAC|C:0.0020089:9:Estonian|C:0.0011216:136:ExAC|C:0.0098684:3:FINRISK|C:0.000944:1323:GnomAD_exomes|C:0.0012059:180:GnomAD_genomes|C:0.001002:1:GoNL|C:0.0016667:1:NorthernSweden|C:0.0000254:2:PAGE_STUDY|C:0.0003022:80:TOPMED|C:0.0005394:2:TWINSUK|C:0.000417:65:ALFA
21	31668341	G>A,C	snv	117304270	likely-benign	by-frequency;by-alfa;by-cluster	intron_variant	SOD1	C:0.003195:16:1000Genomes|C:0.003592:23:1000Genomes_30X|C:0.00986:38:ALSPAC|C:0.020536:92:Estonian|C:0.006725:1003:GnomAD_genomes|C:0.002004:2:GoNL|C:0.02:12:NorthernSweden|C:0.041667:9:Qatari|G:0.:0:SGDP_PRJ|C:0.005712:1512:TOPMED|C:0.007821:29:TWINSUK|C:0.008947:169:ALFA
21	31663829	G>A,C	snv	121912431	pathogenic	by-frequency;by-alfa;by-cluster	2KB_upstream_variant;coding_sequence_variant;missense_variant;upstream_transcript_variant	SOD1;LOC124900469	A:0.00003:2:PAGE_STUDY|A:0.:0:ALFA
21	31663832	C>G	snv	121912432	pathogenic-likely-pathogenic;likely-pathogenic	by-frequency;by-cluster	2KB_upstream_variant;coding_sequence_variant;missense_variant;upstream_transcript_variant	SOD1;LOC124900469	G:0.:0:PAGE_STUDY
21	31663841	G>A	snv	121912433	pathogenic	by-frequency;by-alfa;by-cluster	2KB_upstream_variant;coding_sequence_variant;missense_variant;upstream_transcript_variant	SOD1;LOC124900469	A:0.:0:PAGE_STUDY|A:0.000004:1:TOPMED|A:0.:0:ALFA
21	31663842	G>A	snv	121912434	pathogenic	by-frequency;by-alfa;by-cluster	2KB_upstream_variant;coding_sequence_variant;missense_variant;upstream_transcript_variant	SOD1;LOC124900469	A:0.:0:PAGE_STUDY|A:0.00004:1:ALFA
21	31663848	A>G	snv	121912435	pathogenic	by-frequency;by-alfa;by-cluster	2KB_upstream_variant;coding_sequence_variant;missense_variant;upstream_transcript_variant	SOD1;LOC124900469	G:0.000001:1:GnomAD_exomes|G:0.000013:1:PAGE_STUDY|G:0.:0:ALFA
21	31667274	G>A,C	snv	121912436	pathogenic;likely-pathogenic	by-frequency;by-alfa;by-cluster	coding_sequence_variant;missense_variant	SOD1	C:0.:0:PAGE_STUDY|A:0.:0:ALFA
21	31667298	G>A,C,T	snv	121912437	pathogenic;likely-pathogenic	by-frequency;by-alfa;by-cluster	coding_sequence_variant;missense_variant	SOD1	C:0.:0:PAGE_STUDY|T:0.:0:ALFA
21	31667299	G>A,C,T	snv	121912438	pathogenic	by-frequency;by-alfa;by-cluster	coding_sequence_variant;missense_variant	SOD1	A:0.000002:1:GnomAD_exomes|C:0.:0:PAGE_STUDY|C:0.000039:3:TOMMO|T:0.:0:ALFA
21	31667320	A>G	snv	121912439	pathogenic	by-frequency;by-alfa;by-cluster	coding_sequence_variant;missense_variant	SOD1	G:0.00001:1:PAGE_STUDY|G:0.00004:1:ALFA
21	31667337	C>G,T	snv	121912440	pathogenic	by-frequency;by-alfa;by-cluster	coding_sequence_variant;missense_variant	SOD1	T:0.:0:ALFA
21	31667359	T>C	snv	121912441	pathogenic-likely-pathogenic;pathogenic	by-frequency;by-alfa;by-cluster	coding_sequence_variant;missense_variant	SOD1	C:0.0000222:31:GnomAD_exomes|C:0.0000067:1:GnomAD_genomes|C:0.0000129:1:TOMMO|C:0.0000076:2:TOPMED|C:0.:0:ALFA
21	31659783	C>T	snv	121912442	pathogenic	by-frequency;by-alfa;by-cluster	coding_sequence_variant;missense_variant	SOD1	T:0.000003:2:GnomAD_exomes|T:0.000013:1:PAGE_STUDY|T:0.000031:1:ALFA
21	31663857	A>C,G	snv	121912443	pathogenic	by-frequency;by-alfa;by-cluster	2KB_upstream_variant;coding_sequence_variant;missense_variant;upstream_transcript_variant	SOD1;LOC124900469	C:0.000002:1:GnomAD_exomes|G:0.:0:ALFA
21	31659782	G>A,T	snv	121912444	pathogenic	by-frequency;by-alfa;by-cluster	coding_sequence_variant;missense_variant	SOD1	A:0.00001:1:PAGE_STUDY|T:0.:0:ALFA
21	31667331	A>G,T	snv	121912445	pathogenic;likely-pathogenic	by-frequency;by-cluster	coding_sequence_variant;missense_variant	SOD1	G:0.000003:2:GnomAD_exomes
21	31668547	T>C	snv	121912446	pathogenic	by-frequency;by-alfa;by-cluster	coding_sequence_variant;missense_variant	SOD1	C:0.:0:PAGE_STUDY|C:0.:0:ALFA
21	31668549	G>A	snv	121912447	likely-pathogenic	by-frequency;by-alfa;by-cluster	coding_sequence_variant;missense_variant	SOD1	A:0.00001:1:PAGE_STUDY|A:0.:0:ALFA
21	31659789	G>A,T	snv	121912448	pathogenic	by-frequency;by-alfa;by-cluster	coding_sequence_variant;missense_variant	SOD1	A:0.00001:1:TOMMO|T:0.:0:ALFA
21	31668568	T>C,G	snv	121912449	uncertain-significance;pathogenic	by-frequency;by-alfa;by-cluster	coding_sequence_variant;missense_variant	SOD1	C:0.00001:1:PAGE_STUDY|C:0.:0:ALFA
21	31659833	G>A	snv	121912450	pathogenic	by-frequency;by-alfa;by-cluster	coding_sequence_variant;missense_variant	SOD1	A:0.:0:PAGE_STUDY|A:0.:0:ALFA
21	31668517	G>A,C	snv	121912451	pathogenic	by-frequency;by-alfa;by-cluster	coding_sequence_variant;missense_variant	SOD1	A:0.0000082:1:ExAC|A:0.0000007:1:GnomAD_exomes|A:0.0000254:2:PAGE_STUDY|A:0.0000388:3:TOMMO|A:0.:0:ALFA
21	31667271	T>C,G	snv	121912452	likely-benign;pathogenic	by-frequency;by-alfa;by-cluster	coding_sequence_variant;missense_variant;synonymous_variant	SOD1	C:0.000008:1:ExAC|C:0.000002:1:GnomAD_exomes|C:0.000013:2:GnomAD_genomes|C:0.000684:2:KOREAN|G:0.000051:4:PAGE_STUDY|C:0.000004:1:TOPMED|G:0.00002:1:ALFA
21	31659818	G>A,T	snv	121912453	pathogenic;likely-pathogenic	by-frequency;by-alfa;by-cluster	coding_sequence_variant;missense_variant	SOD1	A:0.:0:PAGE_STUDY|A:0.:0:ALFA
21	31668493	T>A,C	snv	121912454	pathogenic	by-frequency;by-alfa;by-cluster	stop_gained;coding_sequence_variant;missense_variant	SOD1	A:0.:0:PAGE_STUDY|C:0.:0:ALFA
21	31666496	G>A,T	snv	121912455	likely-pathogenic	by-frequency;by-alfa;by-cluster	coding_sequence_variant;missense_variant	SOD1	A:0.000009:1:ExAC|A:0.000013:1:PAGE_STUDY|T:0.:0:ALFA
21	31659806	G>A,C	snv	121912456	likely-pathogenic	by-frequency;by-cluster	coding_sequence_variant;missense_variant	SOD1	A:0.000002:1:GnomAD_exomes|C:0.:0:PAGE_STUDY
21	31663854	T>C,G	snv	121912457	pathogenic	by-frequency;by-alfa;by-cluster	2KB_upstream_variant;coding_sequence_variant;missense_variant;upstream_transcript_variant	SOD1;LOC124900469	G:0.:0:PAGE_STUDY|G:0.:0:ALFA
21	31667260	A>G	snv	121912458	pathogenic	by-frequency;by-alfa;by-cluster	coding_sequence_variant;missense_variant	SOD1	G:0.:0:PAGE_STUDY|G:0.:0:ALFA
21	31667307	G>A,C	snv	121912459	uncertain-significance;pathogenic	by-frequency;by-alfa;by-cluster	coding_sequence_variant;missense_variant	SOD1	A:0.000033:4:ExAC|A:0.000342:1:KOREAN|A:0.000013:1:PAGE_STUDY|A:0.000004:1:TOPMED|A:0.000008:1:ALFA
21	31659683	G>A,C,T	snv	139202139	uncertain-significance	by-frequency;by-alfa;by-cluster	2KB_upstream_variant;upstream_transcript_variant	SOD1	C:0.0002:1:1000Genomes|C:0.00016:1:1000Genomes_30X|A:0.00052:2:ALSPAC|A:0.00022:1:Estonian|T:0.00034:1:KOREAN|A:0.00081:3:TWINSUK|A:0.00005:1:ALFA
21	31659722	T>A,G	snv	142752986	benign	by-frequency;by-alfa;by-cluster	5_prime_UTR_variant	SOD1	A:0.005791:29:1000Genomes|A:0.00609:39:1000Genomes_30X|G:0.:0:ALSPAC|A:0.001709:204:ExAC|A:0.006535:85:GoESP|T:0.5:1:SGDP_PRJ|A:0.006419:1699:TOPMED|G:0.00027:1:TWINSUK|A:0.001159:27:ALFA
21	31668536	T>A	snv	143100660	likely-benign;benign-likely-benign	by-frequency;by-alfa;by-cluster	coding_sequence_variant;synonymous_variant	SOD1	A:0.0003994:2:1000Genomes|A:0.0007808:5:1000Genomes_30X|A:0.0002595:1:ALSPAC|A:0.0004615:56:ExAC|A:0.0003568:500:GnomAD_exomes|A:0.0003349:50:GnomAD_genomes|A:0.0003076:4:GoESP|A:0.000374:99:TOPMED|A:0.:0:TWINSUK|A:0.0004689:21:ALFA
21	31663804	A>G	snv	145198224	likely-benign	by-frequency;by-alfa;by-cluster	2KB_upstream_variant;coding_sequence_variant;synonymous_variant;upstream_transcript_variant	SOD1;LOC124900469	G:0.0001997:1:1000Genomes|G:0.0001562:1:1000Genomes_30X|G:0.0001071:13:ExAC|G:0.0000143:20:GnomAD_exomes|G:0.0001608:24:GnomAD_genomes|G:0.0000769:1:GoESP|G:0.0001906:15:PAGE_STUDY|G:0.0001322:35:TOPMED|G:0.0000155:2:ALFA
21	31666474	T>C	snv	147620646	likely-benign	by-frequency;by-alfa;by-cluster	coding_sequence_variant;synonymous_variant	SOD1	C:0.0001997:1:1000Genomes|C:0.0001562:1:1000Genomes_30X|C:0.0000791:9:ExAC|C:0.0000186:26:GnomAD_exomes|C:0.0002478:37:GnomAD_genomes|C:0.0002307:3:GoESP|C:0.0002493:66:TOPMED|C:0.0001014:4:ALFA
21	31668731	T>G	snv	188029963	uncertain-significance	by-frequency;by-alfa;by-cluster	3_prime_UTR_variant	SOD1	G:0.000399:2:1000Genomes|G:0.000312:2:1000Genomes_30X|G:0.00467:18:ALSPAC|G:0.004464:20:Estonian|G:0.002628:1255:GnomAD_exomes|G:0.001962:293:GnomAD_genomes|G:0.004008:4:GoNL|G:0.000138:1:Korea4K|G:0.001873:1:MGP|T:0.5:1:SGDP_PRJ|G:0.001821:482:TOPMED|G:0.003506:13:TWINSUK|G:0.00295:123:ALFA
21	31668895	T>C	snv	191345676	benign	by-frequency;by-alfa;by-cluster	3_prime_UTR_variant	SOD1	C:0.000599:3:1000Genomes|C:0.000468:3:1000Genomes_30X|C:0.000228:35:GnomAD_exomes|C:0.000114:17:GnomAD_genomes|C:0.00308:9:KOREAN|C:0.002183:4:Korea1K|C:0.001798:13:Korea4K|C:0.001409:109:TOMMO|C:0.000317:84:TOPMED|C:0.000027:1:ALFA
21	31667370	C>G	snv	199474723	uncertain-significance;pathogenic-likely-pathogenic	by-cluster	coding_sequence_variant;missense_variant	SOD1
21	31659784	C>A,T	snv	199766524	likely-benign	by-frequency;by-alfa;by-cluster	coding_sequence_variant;synonymous_variant	SOD1	T:0.0002:1:1000Genomes|T:0.000312:2:1000Genomes_30X|T:0.000033:4:ExAC|T:0.000114:17:GnomAD_genomes|T:0.000077:1:GoESP|T:0.000144:38:TOPMED|T:0.000038:2:ALFA
21	31666866	AAAAA>-,A,AA,AAA,AAAA,AAAAAA,AAAAAAA,AAAAAAAA	delins	200145715	likely-benign	by-frequency;by-alfa;by-cluster	intron_variant	SOD1	A:0.005:3:NorthernSweden|AAAAAAAA:0.:0:ALFA
21	31663782	T>C	snv	200764110	benign;likely-benign	by-frequency;by-alfa;by-cluster	upstream_transcript_variant;intron_variant;2KB_upstream_variant	SOD1;LOC124900469	C:0.0001997:1:1000Genomes|C:0.0001562:1:1000Genomes_30X|C:0.0000082:1:ExAC|C:0.000005:7:GnomAD_exomes|C:0.0000536:8:GnomAD_genomes|C:0.0000793:21:TOPMED|C:0.0000329:1:ALFA
21	31663867	G>A	snv	201045805	likely-benign	by-frequency;by-alfa;by-cluster	coding_sequence_variant;synonymous_variant;2KB_upstream_variant;upstream_transcript_variant	SOD1;LOC124900469	A:0.0000247:3:ExAC|A:0.0000136:19:GnomAD_exomes|A:0.0000113:3:TOPMED|A:0.0001873:2:ALFA
21	31659860	G>A,T	snv	201574089	benign;likely-benign	by-frequency;by-alfa;by-cluster	intron_variant	SOD1	A:0.000445:53:ExAC|A:0.000529:79:GnomAD_genomes|A:0.000077:1:GoESP|A:0.001873:1:MGP|A:0.000529:140:TOPMED|A:0.001025:24:ALFA
21	31666495	C>A,G,T	snv	368042695	uncertain-significance;likely-benign	by-frequency;by-alfa;by-cluster	coding_sequence_variant;synonymous_variant;missense_variant	SOD1	T:0.00007:8:ExAC|T:0.00002:3:GnomAD_genomes|T:0.000154:2:GoESP|T:0.000013:1:TOMMO|T:0.000015:4:TOPMED|T:0.000023:1:ALFA
21	31668460	A>G,T	snv	369600566	pathogenic	by-frequency;by-alfa;by-cluster	intron_variant	SOD1	G:0.000017:2:ExAC|G:0.000013:2:GnomAD_genomes|G:0.000154:2:GoESP|G:0.:0:PAGE_STUDY|T:0.:0:ALFA
21	31666438	C>A,T	snv	370816162	likely-benign	by-frequency;by-alfa;by-cluster	intron_variant	SOD1	T:0.0026786:12:Estonian|T:0.0001035:10:ExAC|T:0.000013:18:GnomAD_exomes|T:0.0002307:3:GoESP|T:0.0003422:1:KOREAN|T:0.0005091:14:ALFA
21	31668557	T>C,G	snv	372540831	likely-benign	by-frequency;by-alfa;by-cluster	coding_sequence_variant;synonymous_variant	SOD1	C:0.000016:2:ExAC|C:0.000005:3:GnomAD_exomes|C:0.000154:2:GoESP|G:0.:0:ALFA
21	31666459	T>C	snv	373888553	likely-benign	by-frequency;by-alfa;by-cluster	coding_sequence_variant;synonymous_variant	SOD1	C:0.0002595:1:ALSPAC|C:0.0001259:14:ExAC|C:0.0001122:157:GnomAD_exomes|C:0.0000402:6:GnomAD_genomes|C:0.0001538:2:GoESP|C:0.0000378:10:TOPMED|C:0.:0:TWINSUK|C:0.0003124:21:ALFA
21	31663786	A>G,T	snv	374242306	likely-benign	by-frequency;by-alfa;by-cluster	upstream_transcript_variant;intron_variant;2KB_upstream_variant	SOD1;LOC124900469	G:0.0000906:11:ExAC|G:0.000033:46:GnomAD_exomes|G:0.0000603:9:GnomAD_genomes|G:0.0002307:3:GoESP|T:0.0000129:1:TOMMO|G:0.0000642:17:TOPMED|G:0.0001351:6:ALFA
21	31659861	C>T	snv	374484610	uncertain-significance	by-frequency;by-alfa;by-cluster	intron_variant	SOD1	T:0.0000084:1:ExAC|T:0.0000086:12:GnomAD_exomes|T:0.0000067:1:GnomAD_genomes|T:0.0000769:1:GoESP|T:0.0000038:1:TOPMED|T:0.:0:ALFA
21	31666524	A>C	snv	374610141	uncertain-significance;benign	by-frequency;by-alfa;by-cluster	intron_variant	SOD1	C:0.0000552:6:ExAC|C:0.0000137:19:GnomAD_exomes|C:0.0001877:28:GnomAD_genomes|C:0.0002307:3:GoESP|C:0.0002078:55:TOPMED|C:0.0000579:3:ALFA
21	31659808	C>A,T	snv	377178013	likely-benign	by-frequency;by-alfa;by-cluster	coding_sequence_variant;synonymous_variant	SOD1	T:0.000008:1:ExAC|T:0.000154:2:GoESP|T:0.001375:4:KOREAN|T:0.000011:3:TOPMED|T:0.:0:ALFA
21	31667339	C>G,T	snv	377269573	likely-benign	by-frequency;by-cluster	coding_sequence_variant;synonymous_variant	SOD1	T:0.000008:1:ExAC|T:0.000005:3:GnomAD_exomes|G:0.000007:1:GnomAD_genomes|T:0.000077:1:GoESP
21	31659687	T>C,G	snv	377427683	benign	by-frequency;by-alfa;by-cluster	upstream_transcript_variant;2KB_upstream_variant	SOD1	C:0.002396:12:1000Genomes|C:0.00203:13:1000Genomes_30X|C:0.000536:80:GnomAD_genomes|C:0.011301:33:KOREAN|C:0.008939:16:Korea1K|C:0.009318:67:Korea4K|T:0.5:1:SGDP_PRJ|C:0.007941:615:TOMMO|C:0.000725:192:TOPMED|C:0.013889:3:Vietnamese|C:0.000139:2:ALFA
21	31659714	T>A,C,G	snv	535066119	uncertain-significance	by-frequency;by-alfa;by-cluster	5_prime_UTR_variant	SOD1	C:0.:0:ALFA
21	31663936	AACAGTA>-	delins	541000032	benign;benign-likely-benign;likely-benign	by-frequency;by-alfa;by-cluster	2KB_upstream_variant;upstream_transcript_variant;intron_variant	SOD1;LOC124900469	-:0.0009984:5:1000Genomes|-:0.004411:17:ALSPAC|-:0.0022321:10:Estonian|-:0.002563:310:ExAC|-:0.0031894:3783:GnomAD_exomes|-:0.002459:367:GnomAD_genomes|-:0.0031954:40:GoESP|-:0.008016:8:GoNL|-:0.0016667:1:NorthernSweden|-:0.0023764:629:TOPMED|-:0.0059331:22:TWINSUK|TA:0.0043624:120:ALFA
21	31667306	C>T	snv	557930089	likely-benign	by-frequency;by-alfa;by-cluster	coding_sequence_variant;synonymous_variant	SOD1	T:0.0001997:1:1000Genomes|T:0.0001562:1:1000Genomes_30X|T:0.0000082:1:ExAC|T:0.0000043:6:GnomAD_exomes|T:0.0000134:2:GnomAD_genomes|T:0.0000129:1:TOMMO|T:0.0000113:3:TOPMED|T:0.0000712:1:ALFA
21	31667346	G>A,T	snv	567432143	uncertain-significance	by-frequency;by-alfa;by-cluster	coding_sequence_variant;missense_variant	SOD1	T:0.:0:ALSPAC|T:0.0000082:1:ExAC|T:0.0000385:54:GnomAD_exomes|T:0.0000067:1:GnomAD_genomes|T:0.001002:1:GoNL|T:0.0000113:3:TOPMED|T:0.0002697:1:TWINSUK|T:0.:0:ALFA
21	31668558	G>A	snv	567511139	likely-pathogenic	by-frequency;by-alfa;by-cluster	coding_sequence_variant;missense_variant	SOD1	A:0.0003994:2:1000Genomes|A:0.0003123:2:1000Genomes_30X|A:0.0000247:3:ExAC|A:0.0000021:3:GnomAD_exomes|A:0.0000201:3:GnomAD_genomes|A:0.:0:ALFA
21	31659679	C>A,G,T	snv	568985632	uncertain-significance	by-frequency;by-alfa;by-cluster	2KB_upstream_variant;upstream_transcript_variant	SOD1	G:0.0002:1:1000Genomes|G:0.00016:1:1000Genomes_30X|G:0.00014:1:Korea4K|G:0.00001:1:TOMMO|G:0.:0:ALFA
21	31659744	A>G	snv	571199057	likely-benign	by-frequency;by-alfa;by-cluster	5_prime_UTR_variant	SOD1	G:0.0001997:1:1000Genomes|G:0.0001562:1:1000Genomes_30X|G:0.0001087:13:ExAC|G:0.0000278:39:GnomAD_exomes|G:0.0000067:1:GnomAD_genomes|G:0.0000076:2:TOPMED|G:0.0000712:1:ALFA
21	31667244	T>C	snv	571699772	likely-benign	by-frequency;by-cluster	intron_variant	SOD1	C:0.0001997:1:1000Genomes|C:0.0001562:1:1000Genomes_30X|C:0.0000171:2:ExAC|C:0.0000072:10:GnomAD_exomes|C:0.0000067:1:GnomAD_genomes
21	31659686	C>A,G,T	snv	573544165	uncertain-significance	by-frequency;by-alfa;by-cluster	2KB_upstream_variant;upstream_transcript_variant	SOD1	G:0.0008:4:1000Genomes|G:0.00078:5:1000Genomes_30X|T:0.00034:1:KOREAN|C:0.5:1:SGDP_PRJ|T:0.:0:ALFA
21	31667378	A>G	snv	746682134	uncertain-significance	by-frequency;by-alfa;by-cluster	intron_variant	SOD1	G:0.0000082:1:ExAC|G:0.0000376:52:GnomAD_exomes|G:0.0000201:3:GnomAD_genomes|G:0.0000076:2:TOPMED|G:0.0000868:2:ALFA
21	31668570	G>A	snv	747094021	uncertain-significance	by-frequency;by-alfa;by-cluster	coding_sequence_variant;missense_variant	SOD1	A:0.0000247:3:ExAC|A:0.00001:14:GnomAD_exomes|A:0.0000113:3:TOPMED|A:0.0000508:1:ALFA
21	31667376	->T	delins	747768384	uncertain-significance	by-frequency;by-alfa;by-cluster	splice_donor_variant	SOD1	T:0.:0:ALSPAC|T:0.0000115:16:GnomAD_exomes|T:0.0002697:1:TWINSUK|TT:0.0000936:1:ALFA
21	31667360	T>G	snv	750335577	likely-pathogenic	by-frequency;by-cluster	coding_sequence_variant;missense_variant	SOD1	G:0.0000082:1:ExAC|G:0.0000014:2:GnomAD_exomes
21	31663866	A>-	del	752237082	uncertain-significance	by-frequency;by-alfa;by-cluster	frameshift_variant;2KB_upstream_variant;coding_sequence_variant;upstream_transcript_variant	SOD1;LOC124900469	-:0.0000082:1:ExAC|-:0.0000057:8:GnomAD_exomes|-:0.0000076:2:TOPMED|-:0.:0:ALFA
21	31668527	A>G	snv	752378382	likely-benign	by-frequency;by-alfa;by-cluster	synonymous_variant;coding_sequence_variant	SOD1	G:0.0000165:2:ExAC|G:0.0000071:10:GnomAD_exomes|G:0.0000201:3:GnomAD_genomes|G:0.0000756:20:TOPMED|G:0.000099:3:ALFA
21	31659854	A>G	snv	754347852	likely-benign	by-frequency;by-alfa;by-cluster	intron_variant	SOD1	G:0.0000084:1:ExAC|G:0.0000071:10:GnomAD_exomes|G:0.0000067:1:GnomAD_genomes|G:0.0000151:4:TOPMED|G:0.:0:ALFA
21	31659835	G>A	snv	756458346	conflicting-interpretations-of-pathogenicity	by-frequency;by-alfa;by-cluster	synonymous_variant;coding_sequence_variant	SOD1	A:0.000025:3:ExAC|A:0.00001:14:GnomAD_exomes|A:0.0000076:2:TOPMED|A:0.0000474:2:ALFA
21	31667369	A>C,G	snv	757951479	likely-benign	by-frequency;by-alfa;by-cluster	synonymous_variant;coding_sequence_variant	SOD1	C:0.000016:2:ExAC|G:0.:0:ALFA
21	31659803	G>A,T	snv	762628133	likely-pathogenic	by-frequency;by-alfa;by-cluster	coding_sequence_variant;missense_variant	SOD1	T:0.000008:1:ExAC|T:0.000007:1:GnomAD_genomes|T:0.000011:3:TOPMED|T:0.:0:ALFA
21	31667336	A>T	snv	763963373	likely-benign	by-frequency;by-alfa;by-cluster	synonymous_variant;coding_sequence_variant	SOD1	T:0.0000082:1:ExAC|T:0.0000078:11:GnomAD_exomes|T:0.0000038:1:TOPMED|T:0.0000301:1:ALFA
21	31666533	A>T	snv	766574368	likely-benign	by-frequency;by-alfa;by-cluster	intron_variant	SOD1	T:0.0002232:1:Estonian|T:0.0000186:2:ExAC|T:0.0000066:9:GnomAD_exomes|T:0.0000067:1:GnomAD_genomes|T:0.0002237:1:ALFA
21	31659828	A>G,T	snv	768029813	uncertain-significance;likely-benign	by-frequency;by-alfa;by-cluster	coding_sequence_variant;missense_variant	SOD1	G:0.0012974:5:ALSPAC|G:0.0000834:10:ExAC|G:0.0000792:111:GnomAD_exomes|G:0.0000469:7:GnomAD_genomes|G:0.0000491:13:TOPMED|G:0.0005394:2:TWINSUK|G:0.000107:7:ALFA
21	31663813	G>A	snv	769715106	likely-benign	by-frequency;by-alfa;by-cluster	synonymous_variant;2KB_upstream_variant;coding_sequence_variant;upstream_transcript_variant	SOD1;LOC124900469	A:0.000008:1:ExAC|A:0.000002:1:GnomAD_exomes|A:0.000007:1:GnomAD_genomes|A:0.000004:1:TOPMED|A:0.:0:ALFA
21	31667255	T>C,G	snv	770227978	uncertain-significance	by-frequency;by-alfa;by-cluster	intron_variant	SOD1	C:0.0000168:2:ExAC|C:0.0000007:1:GnomAD_exomes|C:0.0000067:1:GnomAD_genomes|C:0.0000038:1:TOPMED|C:0.:0:ALFA
21	31667247	CATT>-	delins	770449123	likely-benign	by-frequency;by-alfa;by-cluster	intron_variant	SOD1	-:0.0000171:2:ExAC|-:0.0000014:2:GnomAD_exomes|-:0.0000201:3:GnomAD_genomes|-:0.0035149:44:GoESP|-:0.0000264:7:TOPMED|TT:0.:0:ALFA
21	31667406	TCT>-	delins	772727110	likely-benign	by-frequency;by-alfa;by-cluster	intron_variant	SOD1	-:0.0001562:1:1000Genomes_30X|-:0.0002595:1:ALSPAC|-:0.0000988:12:ExAC|-:0.0002407:283:GnomAD_exomes|-:0.0001408:21:GnomAD_genomes|-:0.0003195:4:GoESP|-:0.0001473:39:TOPMED|-:0.:0:TWINSUK|CTTCT:0.0003559:5:ALFA
21	31659796	G>A,C	snv	772764888	likely-benign	by-frequency;by-alfa;by-cluster	coding_sequence_variant;synonymous_variant	SOD1	A:0.000008:1:ExAC|A:0.000013:2:GnomAD_genomes|A:0.000008:2:TOPMED|A:0.000071:1:ALFA
21	31668450	CTT>-	delins	774491046	likely-benign	by-frequency;by-alfa;by-cluster	intron_variant	SOD1	-:0.0000248:3:ExAC|-:0.0000073:10:GnomAD_exomes|-:0.0000038:1:TOPMED|TCTT:0.:0:ALFA
21	31667296	A>G,T	snv	774994509	uncertain-significance	by-frequency;by-alfa;by-cluster	coding_sequence_variant;missense_variant	SOD1	G:0.0000082:1:ExAC|G:0.000005:7:GnomAD_exomes|G:0.0000038:1:TOPMED|G:0.0000712:1:ALFA
21	31667242	G>A	snv	779802862	likely-benign	by-frequency;by-alfa;by-cluster	intron_variant	SOD1	A:0.0000172:2:ExAC|A:0.0000043:6:GnomAD_exomes|A:0.0000067:1:GnomAD_genomes|A:0.0000076:2:TOPMED|A:0.:0:ALFA
21	31666430	CTT>-	delins	781696162	likely-benign	by-frequency;by-alfa;by-cluster	intron_variant	SOD1	-:0.0001152:10:ExAC|-:0.0000378:52:GnomAD_exomes|-:0.0000804:12:GnomAD_genomes|-:0.0070344:88:GoESP|-:0.0000129:1:TOMMO|-:0.0000642:17:TOPMED|TTCTTCTT:0.0000869:2:ALFA
21	31668848	CTTT>-	delins	906761540	uncertain-significance	by-frequency;by-alfa;by-cluster	3_prime_UTR_variant	SOD1	-:0.000157:39:GnomAD_exomes|-:0.000154:23:GnomAD_genomes|-:0.000138:1:Korea4K|-:0.000065:5:TOMMO|-:0.00014:37:TOPMED|TTT:0.000142:2:ALFA
21	31668509	T>C,G	snv	1027128618	likely-pathogenic	by-frequency;by-alfa;by-cluster	synonymous_variant;missense_variant;coding_sequence_variant	SOD1	C:0.0000007:1:GnomAD_exomes|C:0.0000067:1:GnomAD_genomes|C:0.0000113:3:TOPMED|C:0.:0:ALFA
21	31659767	G>A	snv	1029532112	likely-benign	by-frequency;by-alfa;by-cluster	5_prime_UTR_variant	SOD1	A:0.0000435:61:GnomAD_exomes|A:0.0000067:1:GnomAD_genomes|A:0.0000189:5:TOPMED|A:0.0000283:1:ALFA
21	31666472	T>C	snv	1030039318	uncertain-significance;conflicting-interpretations-of-pathogenicity	by-frequency;by-alfa;by-cluster	missense_variant;coding_sequence_variant	SOD1	C:0.000013:2:GnomAD_genomes|C:0.000011:3:TOPMED|C:0.000033:1:ALFA
21	31663823	A>T	snv	1057524474	uncertain-significance	by-cluster	2KB_upstream_variant;missense_variant;upstream_transcript_variant;coding_sequence_variant	SOD1;LOC124900469
21	31668550	C>A,G,T	snv	1131690781	likely-pathogenic	by-cluster	missense_variant;coding_sequence_variant	SOD1
21	31668490	A>C	snv	1164911383	likely-pathogenic	by-cluster	missense_variant;coding_sequence_variant	SOD1
21	31659837	A>C,G,T	snv	1169198442	likely-pathogenic;pathogenic-likely-pathogenic	by-frequency;by-alfa;by-cluster	missense_variant;coding_sequence_variant	SOD1	G:0.000002:1:GnomAD_exomes|G:0.000007:1:GnomAD_genomes|G:0.000004:1:TOPMED|G:0.:0:ALFA
21	31668561	A>G	snv	1169917994	uncertain-significance	by-frequency;by-cluster	missense_variant;coding_sequence_variant	SOD1	G:0.0000014:2:GnomAD_exomes
21	31668461	T>G	snv	1197141604	pathogenic;uncertain-significance	by-frequency;by-alfa;by-cluster	intron_variant	SOD1	G:0.:0:ALFA
21	31659819	G>C,T	snv	1200906022	pathogenic;pathogenic-likely-pathogenic	by-frequency;by-cluster	missense_variant;coding_sequence_variant	SOD1	T:0.000001:1:GnomAD_exomes
21	31659813	T>C,G	snv	1202989817	likely-pathogenic	by-frequency;by-alfa;by-cluster	missense_variant;coding_sequence_variant	SOD1	C:0.000008:5:GnomAD_exomes|C:0.000007:1:GnomAD_genomes|C:0.001375:4:KOREAN|C:0.000139:1:Korea4K|C:0.000297:23:TOMMO|C:0.000004:1:TOPMED|G:0.:0:ALFA
21	31667373	G>C,T	snv	1235629842	uncertain-significance	by-frequency;by-alfa;by-cluster	missense_variant;coding_sequence_variant	SOD1	T:0.:0:ALFA
21	31667365	G>A	snv	1240334553	uncertain-significance;likely-pathogenic	by-frequency;by-alfa;by-cluster	missense_variant;coding_sequence_variant	SOD1	A:0.0000014:2:GnomAD_exomes|A:0.0000067:1:GnomAD_genomes|A:0.0000076:2:TOPMED|A:0.:0:ALFA
21	31663876	T>C	snv	1276917683	likely-benign	by-frequency;by-alfa;by-cluster	2KB_upstream_variant;upstream_transcript_variant;coding_sequence_variant;synonymous_variant	SOD1;LOC124900469	C:0.000003:2:GnomAD_exomes|C:0.000007:1:GnomAD_genomes|C:0.000004:1:TOPMED|C:0.:0:ALFA
21	31667287	C>T	snv	1280042397	likely-pathogenic;pathogenic	by-frequency;by-alfa;by-cluster	missense_variant;coding_sequence_variant	SOD1	T:0.000012:7:GnomAD_exomes|T:0.000007:1:GnomAD_genomes|T:0.:0:ALFA
21	31667364	C>G,T	snv	1301635320	uncertain-significance;pathogenic-likely-pathogenic;pathogenic;likely-pathogenic	by-frequency;by-alfa;by-cluster	coding_sequence_variant;missense_variant	SOD1	T:0.0000057:8:GnomAD_exomes|T:0.0000076:2:TOPMED|T:0.:0:ALFA
21	31659788	T>A,G	snv	1312702973	likely-pathogenic;pathogenic	by-frequency;by-alfa;by-cluster	coding_sequence_variant;missense_variant	SOD1	G:0.:0:ALFA
21	31667273	G>C	snv	1315541036	pathogenic	by-cluster	coding_sequence_variant;missense_variant	SOD1
21	31667281	T>C	snv	1339283341	likely-pathogenic	by-frequency;by-alfa;by-cluster	coding_sequence_variant;missense_variant	SOD1	C:0.:0:ALFA
21	31667335	C>G,T	snv	1378590183	pathogenic	by-frequency;by-cluster	missense_variant;coding_sequence_variant;stop_gained	SOD1	G:0.000003:2:GnomAD_exomes|G:0.000026:2:TOMMO
21	31668475	A>G,T	snv	1410925719	uncertain-significance	by-frequency;by-cluster	coding_sequence_variant;missense_variant	SOD1	G:0.000003:2:GnomAD_exomes
21	31666458	G>A,T	snv	1413388444	uncertain-significance	by-frequency;by-alfa;by-cluster	coding_sequence_variant;missense_variant	SOD1	T:0.0000007:1:GnomAD_exomes|A:0.0000067:1:GnomAD_genomes|A:0.0000038:1:TOPMED|T:0.0000814:3:ALFA
21	31668562	T>A,C,G	snv	1424014997	likely-pathogenic;pathogenic;pathogenic-likely-pathogenic	by-frequency;by-alfa;by-cluster	coding_sequence_variant;missense_variant	SOD1	C:0.:0:ALFA
21	31659838	G>A,C,T	snv	1424217272	likely-pathogenic	by-frequency;by-cluster	coding_sequence_variant;synonymous_variant;missense_variant	SOD1	C:0.00003:2:TOMMO
21	31663812	T>C,G	snv	1428716759	likely-pathogenic;uncertain-significance	by-frequency;by-alfa;by-cluster	2KB_upstream_variant;coding_sequence_variant;upstream_transcript_variant;missense_variant	SOD1;LOC124900469	G:0.000007:1:GnomAD_genomes|G:0.000004:1:TOPMED|G:0.:0:ALFA
21	31667315	T>C	snv	1432013430	likely-benign	by-frequency;by-alfa;by-cluster	coding_sequence_variant;synonymous_variant	SOD1	C:0.000001:1:GnomAD_exomes|C:0.000684:2:KOREAN|C:0.:0:ALFA
21	31659823	C>A,T	snv	1447729350	likely-benign	by-frequency;by-alfa;by-cluster	coding_sequence_variant;synonymous_variant	SOD1	T:0.000007:1:GnomAD_genomes|A:0.000004:1:TOPMED|A:0.:0:ALFA
21	31666487	A>G	snv	1457291290	uncertain-significance	by-frequency;by-alfa;by-cluster	missense_variant;coding_sequence_variant	SOD1	G:0.000004:1:TOPMED|G:0.:0:ALFA
21	31668471	G>C	snv	1457889952	likely-pathogenic	by-frequency;by-cluster	missense_variant;coding_sequence_variant	SOD1	C:0.000003:2:GnomAD_exomes
21	31668501	G>A,C	snv	1464048449	uncertain-significance	by-frequency;by-alfa;by-cluster	missense_variant;coding_sequence_variant	SOD1	A:0.000005:7:GnomAD_exomes|A:0.0000201:3:GnomAD_genomes|A:0.0000113:3:TOPMED|A:0.:0:ALFA
21	31668559	T>G	snv	1476760624	pathogenic-likely-pathogenic	by-cluster	missense_variant;coding_sequence_variant	SOD1
21	31668548	G>C,T	snv	1482760341	pathogenic	by-frequency;by-alfa;by-cluster	missense_variant;coding_sequence_variant	SOD1	C:0.000004:1:TOPMED|T:0.:0:ALFA
21	31659831	T>G	snv	1555836169	pathogenic		missense_variant;coding_sequence_variant	SOD1
21	31659832	C>G	snv	1555836170	likely-pathogenic	by-frequency;by-cluster	missense_variant;coding_sequence_variant	SOD1	G:0.:0:GnomAD_exomes
21	31663833	T>A,G	snv	1555836520	likely-pathogenic	by-frequency;by-alfa;by-cluster	upstream_transcript_variant;missense_variant;coding_sequence_variant;2KB_upstream_variant	SOD1;LOC124900469	G:0.00004:1:ALFA
21	31666499	G>A	snv	1555836720	uncertain-significance		missense_variant;coding_sequence_variant	SOD1
21	31667308	A>T	snv	1555836803	likely-pathogenic	by-frequency;by-cluster	missense_variant;coding_sequence_variant	SOD1	T:0.0000014:2:GnomAD_exomes
21	31667310	G>A,C	snv	1555836806	uncertain-significance	by-frequency;by-alfa;by-cluster	missense_variant;coding_sequence_variant	SOD1	A:0.000002:1:GnomAD_exomes|A:0.000007:1:GnomAD_genomes|C:0.000004:1:TOPMED|C:0.:0:ALFA
21	31668167	C>A,G	snv	1555836889	pathogenic	by-cluster	intron_variant	SOD1
21	31668535	C>G	snv	1555836937	uncertain-significance		missense_variant;coding_sequence_variant	SOD1
21	31668556	G>A	snv	1555836950	likely-pathogenic;pathogenic	by-frequency;by-alfa	missense_variant;coding_sequence_variant	SOD1	A:0.:0:ALFA
21	31659779	A>G	snv	1568807297	pathogenic	by-frequency;by-alfa;by-cluster	missense_variant;coding_sequence_variant	SOD1	G:0.000002:1:GnomAD_exomes|G:0.:0:ALFA
21	31659785	G>A,C,T	snv	1568807314	uncertain-significance	by-frequency;by-alfa;by-cluster	missense_variant;coding_sequence_variant	SOD1	C:0.0000021:3:GnomAD_exomes|T:0.:0:ALFA
21	31659794	C>G	snv	1568807333	uncertain-significance	by-frequency;by-cluster	missense_variant;coding_sequence_variant	SOD1	G:0.0000021:3:GnomAD_exomes
21	31659795	T>A	snv	1568807342	uncertain-significance		missense_variant;coding_sequence_variant	SOD1
21	31659812	G>A,C	snv	1568807400	pathogenic-likely-pathogenic;likely-pathogenic	by-frequency;by-alfa	missense_variant;coding_sequence_variant	SOD1	A:0.:0:ALFA
21	31663839	A>G	snv	1568809149	conflicting-interpretations-of-pathogenicity	by-frequency;by-alfa	upstream_transcript_variant;missense_variant;coding_sequence_variant;2KB_upstream_variant	SOD1;LOC124900469	G:0.:0:ALFA
21	31663860	T>C	snv	1568809169	likely-pathogenic	by-frequency;by-alfa	upstream_transcript_variant;missense_variant;coding_sequence_variant;2KB_upstream_variant	SOD1;LOC124900469	C:0.:0:ALFA
21	31663863	A>G	snv	1568809172	likely-pathogenic;pathogenic	by-frequency;by-alfa	upstream_transcript_variant;missense_variant;coding_sequence_variant;2KB_upstream_variant	SOD1;LOC124900469	G:0.:0:ALFA
21	31663865	G>A,T	snv	1568809178	uncertain-significance	by-frequency;by-alfa;by-cluster	stop_gained;upstream_transcript_variant;coding_sequence_variant;missense_variant;2KB_upstream_variant	SOD1;LOC124900469	T:0.0000007:1:GnomAD_exomes|A:0.:0:ALFA
21	31666476	A>G	snv	1568810275	pathogenic-likely-pathogenic	by-frequency;by-alfa;by-cluster	missense_variant;coding_sequence_variant	SOD1	G:0.:0:GnomAD_exomes|G:0.000007:1:GnomAD_genomes|G:0.000004:1:TOPMED|G:0.:0:ALFA
21	31666509	A>T	snv	1568810316	pathogenic-likely-pathogenic		missense_variant;coding_sequence_variant	SOD1
21	31667280	G>A,C	snv	1568810641	likely-pathogenic	by-frequency;by-alfa;by-cluster	missense_variant;coding_sequence_variant	SOD1	C:0.0000014:2:GnomAD_exomes|A:0.:0:ALFA
21	31667286	G>A	snv	1568810660	conflicting-interpretations-of-pathogenicity;uncertain-significance	by-frequency;by-alfa;by-cluster	missense_variant;coding_sequence_variant	SOD1	A:0.000002:1:GnomAD_exomes|A:0.:0:ALFA
21	31667304	G>A	snv	1568810686	likely-pathogenic	by-frequency;by-alfa;by-cluster	missense_variant;coding_sequence_variant	SOD1	A:0.000002:1:GnomAD_exomes|A:0.:0:ALFA
21	31667305	C>G,T	snv	1568810690	uncertain-significance	by-frequency;by-alfa;by-cluster	missense_variant;coding_sequence_variant	SOD1	T:0.000005:7:GnomAD_exomes|T:0.:0:ALFA
21	31667322	G>A,C,T	snv	1568810715	pathogenic	by-frequency;by-alfa;by-cluster	missense_variant;coding_sequence_variant	SOD1	T:0.:0:ALFA
21	31667343	G>C	snv	1568810758	uncertain-significance		missense_variant;coding_sequence_variant	SOD1
21	31667352	->G	delins	1568810771	likely-pathogenic;pathogenic		frameshift_variant;coding_sequence_variant	SOD1
21	31667362	G>A,C,T	snv	1568810789	pathogenic	by-frequency;by-alfa;by-cluster	missense_variant;coding_sequence_variant	SOD1	A:0.0000007:1:GnomAD_exomes|T:0.0000038:1:TOPMED|T:0.:0:ALFA
21	31668487	A>C,G,T	snv	1568811366	likely-pathogenic;pathogenic;uncertain-significance	by-frequency;by-alfa;by-cluster	missense_variant;coding_sequence_variant	SOD1	T:0.000007:6:GnomAD_exomes|G:0.:0:ALFA
21	31668489	G>A,C,T	snv	1568811372	likely-pathogenic;uncertain-significance		missense_variant;coding_sequence_variant	SOD1
21	31668510	GAA>-	delins	1568811423	uncertain-significance	by-frequency;by-alfa;by-cluster	inframe_deletion;coding_sequence_variant	SOD1	-:0.0000007:1:GnomAD_exomes|-:0.0000067:1:GnomAD_genomes|GAAGAA:0.:0:ALFA
21	31668514	A>C,G,T	snv	1568811426	likely-pathogenic;pathogenic;uncertain-significance	by-frequency;by-cluster	missense_variant;coding_sequence_variant	SOD1	G:0.000002:1:GnomAD_exomes
21	31668525	A>G,T	snv	1568811445	likely-pathogenic;uncertain-significance	by-frequency;by-alfa;by-cluster	missense_variant;coding_sequence_variant	SOD1	T:0.000002:1:GnomAD_exomes|G:0.:0:ALFA
21	31668526	C>G,T	snv	1568811454	conflicting-interpretations-of-pathogenicity;likely-pathogenic		missense_variant;coding_sequence_variant	SOD1
21	31668529	G>A,T	snv	1568811464	uncertain-significance	by-frequency;by-alfa	missense_variant;coding_sequence_variant	SOD1	A:0.:0:ALFA
21	31668538	G>A,C,T	snv	1568811489	likely-pathogenic;pathogenic;uncertain-significance	by-frequency;by-alfa;by-cluster	missense_variant;coding_sequence_variant	SOD1	A:0.:0:ALFA
21	31668552	T>C	snv	1568811515	likely-pathogenic	by-frequency;by-alfa	missense_variant;coding_sequence_variant	SOD1	C:0.:0:ALFA
21	31668555	G>C,T	snv	1568811520	likely-pathogenic		missense_variant;coding_sequence_variant	SOD1
21	31659825	T>C	snv	1601153438	uncertain-significance		missense_variant;coding_sequence_variant	SOD1
21	31659829	T>C	snv	1601153464	likely-benign	by-frequency	coding_sequence_variant;synonymous_variant	SOD1	C:0.001:3:KOREAN
21	31666508	G>A,T	snv	1601157750	likely-pathogenic;pathogenic	by-frequency;by-alfa;by-cluster	missense_variant;coding_sequence_variant	SOD1	T:0.:0:ALFA
21	31667353	G>A,C	snv	1601158483	pathogenic	by-frequency;by-alfa;by-cluster	missense_variant;coding_sequence_variant	SOD1	C:0.00068:2:KOREAN|A:0.:0:ALFA
21	31663792	A>G	snv	2049569274	uncertain-significance		synonymous_variant;2KB_upstream_variant;coding_sequence_variant;upstream_transcript_variant	SOD1;LOC124900469
21	31663799	GACCAG>-	delins	2049569360	uncertain-significance	by-frequency;by-alfa	inframe_deletion;2KB_upstream_variant;coding_sequence_variant;upstream_transcript_variant	SOD1;LOC124900469	G:0.:0:ALFA
21	31663814	T>C	snv	2049569572	uncertain-significance		missense_variant;2KB_upstream_variant;coding_sequence_variant;upstream_transcript_variant	SOD1;LOC124900469
21	31666484	T>C	snv	2049594204	likely-pathogenic	by-frequency	coding_sequence_variant;missense_variant	SOD1	C:0.0000007:1:GnomAD_exomes
21	31666493	C>T	snv	2049594311	likely-pathogenic		coding_sequence_variant;missense_variant	SOD1
21	31667243	C>G,T	snv	2049601941	likely-benign	by-frequency;by-alfa;by-cluster	intron_variant	SOD1	T:0.:0:ALFA
21	31667330	G>A	snv	2049603364	likely-benign	by-frequency	synonymous_variant;coding_sequence_variant	SOD1	A:0.000001:1:GnomAD_exomes
21	31667349	C>A,G,T	snv	2049603707	uncertain-significance	by-frequency;by-alfa;by-cluster	coding_sequence_variant;missense_variant	SOD1	T:0.00004:3:TOMMO|G:0.:0:ALFA
21	31667361	G>A	snv	2049604095	likely-pathogenic		coding_sequence_variant;missense_variant	SOD1
21	31668172	A>G	snv	2049614155	likely-benign	by-frequency;by-alfa	intron_variant	SOD1	G:0.000004:1:TOPMED|G:0.:0:ALFA
21	31668513	G>A	snv	2049618449	likely-pathogenic	by-frequency	coding_sequence_variant;missense_variant	SOD1	A:0.000002:1:GnomAD_exomes
21	31668553	GTG>-	delins	2049619398	uncertain-significance	by-frequency;by-alfa	inframe_deletion;coding_sequence_variant	SOD1	GTGGTG:0.:0:ALFA
21	31668776	G>A	snv	2049623017	uncertain-significance	by-frequency;by-alfa;by-cluster	3_prime_UTR_variant	SOD1	A:0.000003:1:GnomAD_exomes|A:0.000039:3:TOMMO|A:0.:0:ALFA
21	31659786	T>C	snv	2123427988	uncertain-significance		missense_variant;coding_sequence_variant	SOD1
21	31663810	G>C	snv	2123431867	uncertain-significance		upstream_transcript_variant;missense_variant;2KB_upstream_variant;coding_sequence_variant	SOD1;LOC124900469
21	31663855	->TTCATG	delins	2123431926	uncertain-significance		upstream_transcript_variant;inframe_insertion;2KB_upstream_variant;coding_sequence_variant	SOD1;LOC124900469
21	31666535	C>G,T	snv	2123434677	likely-benign	by-cluster	intron_variant	SOD1
21	31667252	T>A,C	snv	2123435321	likely-benign	by-frequency	intron_variant	SOD1	C:0.0000007:1:GnomAD_exomes
21	31667332	CTCTCA>-	delins	2123435528	uncertain-significance	by-frequency	coding_sequence_variant;inframe_deletion	SOD1	-:0.000002:1:GnomAD_exomes
21	31667342	GAG>-	delins	2123435554	uncertain-significance	by-frequency;by-cluster	coding_sequence_variant;inframe_deletion	SOD1	-:0.00001:1:TOMMO
21	31667371	GGT>-	delins	2123435651	likely-pathogenic		coding_sequence_variant;splice_donor_variant	SOD1
21	31667377	T>G	snv	2123435671	uncertain-significance		splice_donor_variant	SOD1
21	31668563	T>C,G	snv	2123437030	likely-benign;likely-pathogenic	by-frequency	synonymous_variant;missense_variant;coding_sequence_variant	SOD1	C:0.000002:1:GnomAD_exomes
21	31659824	A>T	snv	2516654131	uncertain-significance		missense_variant;coding_sequence_variant	SOD1
21	31663796	->ATGGAC	delins	2516657517	uncertain-significance		upstream_transcript_variant;inframe_insertion;2KB_upstream_variant;coding_sequence_variant	SOD1;LOC124900469
21	31663882	A>G	snv	2516657648	likely-benign		upstream_transcript_variant;synonymous_variant;2KB_upstream_variant;coding_sequence_variant	SOD1;LOC124900469
21	31667259	C>T	snv	2516660280	likely-pathogenic		missense_variant;coding_sequence_variant	SOD1
21	31668500	A>G	snv	2516661400	likely-benign		synonymous_variant;coding_sequence_variant	SOD1
21	31668521	A>G	snv	2516661433	likely-benign	by-frequency	synonymous_variant;coding_sequence_variant	SOD1	G:0.000005:3:GnomAD_exomes
21	31667849	C>T	snv	1041740	benign	by-frequency;by-alfa;by-cluster	intron_variant	SOD1	T:0.242812:1216:1000Genomes|T:0.241412:1546:1000Genomes_30X|T:0.290088:1118:ALSPAC|T:0.23817:1067:Estonian|T:0.275:11:GENOME_DK|T:0.246683:36779:GnomAD_genomes|T:0.292585:292:GoNL|T:0.292553:605:HGDP_Stanford|T:0.23464:443:HapMap|T:0.385666:1130:KOREAN|T:0.385371:706:Korea1K|T:0.376659:2724:Korea4K|T:0.253333:152:NorthernSweden|T:0.20894:16411:PAGE_STUDY|T:0.333333:28:PRJEB36033|T:0.407828:323:PR…
21	31667849	C>T	snv	1041740	benign	by-frequency;by-alfa;by-cluster	intron_variant	SOD1	T:0.242812:1216:1000Genomes|T:0.241412:1546:1000Genomes_30X|T:0.290088:1118:ALSPAC|T:0.23817:1067:Estonian|T:0.275:11:GENOME_DK|T:0.246683:36779:GnomAD_genomes|T:0.292585:292:GoNL|T:0.292553:605:HGDP_Stanford|T:0.23464:443:HapMap|T:0.385666:1130:KOREAN|T:0.385371:706:Korea1K|T:0.376659:2724:Korea4K|T:0.253333:152:NorthernSweden|T:0.20894:16411:PAGE_STUDY|T:0.333333:28:PRJEB36033|T:0.407828:323:PR…
21	31668580	C>G,T	snv	1804447	benign;likely-benign	by-frequency;by-alfa;by-cluster	3_prime_UTR_variant	SOD1	T:0.001398:7:1000Genomes|T:0.001405:9:1000Genomes_30X|T:0.002331:348:GnomAD_genomes|T:0.00223:29:GoESP|T:0.004143:326:PAGE_STUDY|T:0.002618:693:TOPMED|T:0.000371:80:ALFA
21	31667007	A>C,G,T	snv	2070424	benign	by-frequency;by-alfa;by-cluster	intron_variant	SOD1	G:0.248403:1244:1000Genomes|G:0.241255:1545:1000Genomes_30X|G:0.064608:249:ALSPAC|G:0.065402:293:Estonian|G:0.125:5:GENOME_DK|G:0.134254:20028:GnomAD_genomes|G:0.064128:64:GoNL|G:0.231707:437:HapMap|T:0.:0:KOREAN|A:0.499585:3612:Korea4K|G:0.076667:46:NorthernSweden|G:0.421519:333:PRJEB37584|G:0.092593:20:Qatari|A:0.372:93:SGDP_PRJ|A:0.444444:8:Siberian|A:0.482643:37373:TOMMO|G:0.146689:38827:TOPM…
21	31666552	A>C	snv	2234694	benign	by-frequency;by-alfa;by-cluster	intron_variant	SOD1	C:0.0161741:81:1000Genomes|C:0.0151468:97:1000Genomes_30X|C:0.0443695:171:ALSPAC|C:0.0662946:297:Estonian|C:0.0385747:3984:ExAC|C:0.0400993:50454:GnomAD_exomes|C:0.0334334:4990:GnomAD_genomes|C:0.0322159:419:GoESP|C:0.0511022:51:GoNL|C:0.0243446:13:MGP|C:0.0583333:35:NorthernSweden|C:0.0046296:1:Qatari|A:0.4375:7:SGDP_PRJ|A:0.5:2:Siberian|C:0.027111:7176:TOPMED|C:0.0409924:152:TWINSUK|C:0.0046296…
21	31666552	A>C	snv	2234694	benign	by-frequency;by-alfa;by-cluster	intron_variant	SOD1	C:0.0161741:81:1000Genomes|C:0.0151468:97:1000Genomes_30X|C:0.0443695:171:ALSPAC|C:0.0662946:297:Estonian|C:0.0385747:3984:ExAC|C:0.0400993:50454:GnomAD_exomes|C:0.0334334:4990:GnomAD_genomes|C:0.0322159:419:GoESP|C:0.0511022:51:GoNL|C:0.0243446:13:MGP|C:0.0583333:35:NorthernSweden|C:0.0046296:1:Qatari|A:0.4375:7:SGDP_PRJ|A:0.5:2:Siberian|C:0.027111:7176:TOPMED|C:0.0409924:152:TWINSUK|C:0.0046296…
21	31668058	C>T	snv	4817420	benign	by-frequency;by-alfa;by-cluster	intron_variant	SOD1	T:0.242812:1216:1000Genomes|T:0.241412:1546:1000Genomes_30X|T:0.288012:1110:ALSPAC|T:0.40388:458:Daghestan|T:0.237946:1066:Estonian|T:0.275:11:GENOME_DK|T:0.246749:36735:GnomAD_genomes|T:0.292585:292:GoNL|T:0.237687:444:HapMap|T:0.384983:1128:KOREAN|T:0.385371:706:Korea1K|T:0.377593:2730:Korea4K|T:0.253333:152:NorthernSweden|T:0.430556:93:Qatari|C:0.402778:87:SGDP_PRJ|C:0.428571:18:Siberian|T:0.3…
21	31668058	C>T	snv	4817420	benign	by-frequency;by-alfa;by-cluster	intron_variant	SOD1	T:0.242812:1216:1000Genomes|T:0.241412:1546:1000Genomes_30X|T:0.288012:1110:ALSPAC|T:0.40388:458:Daghestan|T:0.237946:1066:Estonian|T:0.275:11:GENOME_DK|T:0.246749:36735:GnomAD_genomes|T:0.292585:292:GoNL|T:0.237687:444:HapMap|T:0.384983:1128:KOREAN|T:0.385371:706:Korea1K|T:0.377593:2730:Korea4K|T:0.253333:152:NorthernSweden|T:0.430556:93:Qatari|C:0.402778:87:SGDP_PRJ|C:0.428571:18:Siberian|T:0.3…
21	31659661	A>C,G	snv	7277748	benign	by-frequency;by-alfa;by-cluster	2KB_upstream_variant;upstream_transcript_variant	SOD1	G:0.039337:197:1000Genomes|G:0.042161:270:1000Genomes_30X|G:0.000259:1:ALSPAC|G:0.116456:92:HapMap|G:0.062619:4928:PAGE_STUDY|G:0.013889:3:Qatari|A:0.4:12:SGDP_PRJ|G:0.04282:11334:TOPMED|G:0.00027:1:TWINSUK|G:0.007694:383:ALFA
21	31659661	A>C,G	snv	7277748	benign	by-frequency;by-alfa;by-cluster	2KB_upstream_variant;upstream_transcript_variant	SOD1	G:0.039337:197:1000Genomes|G:0.042161:270:1000Genomes_30X|G:0.000259:1:ALSPAC|G:0.116456:92:HapMap|G:0.062619:4928:PAGE_STUDY|G:0.013889:3:Qatari|A:0.4:12:SGDP_PRJ|G:0.04282:11334:TOPMED|G:0.00027:1:TWINSUK|G:0.007694:383:ALFA
21	31664078	T>C,G	snv	10432782	benign	by-frequency;by-alfa;by-cluster	intron_variant;2KB_upstream_variant;upstream_transcript_variant	SOD1;LOC124900469	G:0.294928:1477:1000Genomes|G:0.288726:1849:1000Genomes_30X|G:0.109237:421:ALSPAC|G:0.131473:589:Estonian|G:0.125:5:GENOME_DK|G:0.194554:29001:GnomAD_genomes|G:0.11523:115:GoNL|G:0.245399:80:HapMap|T:0.495904:1453:KOREAN|T:0.49599:3587:Korea4K|G:0.135:81:NorthernSweden|G:0.101852:22:Qatari|T:0.35461:100:SGDP_PRJ|T:0.454545:10:Siberian|T:0.483291:37428:TOMMO|G:0.204186:54046:TOPMED|G:0.104639:388:…
21	31664078	T>C,G	snv	10432782	benign	by-frequency;by-alfa;by-cluster	intron_variant;2KB_upstream_variant;upstream_transcript_variant	SOD1;LOC124900469	G:0.294928:1477:1000Genomes|G:0.288726:1849:1000Genomes_30X|G:0.109237:421:ALSPAC|G:0.131473:589:Estonian|G:0.125:5:GENOME_DK|G:0.194554:29001:GnomAD_genomes|G:0.11523:115:GoNL|G:0.245399:80:HapMap|T:0.495904:1453:KOREAN|T:0.49599:3587:Korea4K|G:0.135:81:NorthernSweden|G:0.101852:22:Qatari|T:0.35461:100:SGDP_PRJ|T:0.454545:10:Siberian|T:0.483291:37428:TOMMO|G:0.204186:54046:TOPMED|G:0.104639:388:…
21	31664078	T>C,G	snv	10432782	benign	by-frequency;by-alfa;by-cluster	intron_variant;2KB_upstream_variant;upstream_transcript_variant	SOD1;LOC124900469	G:0.294928:1477:1000Genomes|G:0.288726:1849:1000Genomes_30X|G:0.109237:421:ALSPAC|G:0.131473:589:Estonian|G:0.125:5:GENOME_DK|G:0.194554:29001:GnomAD_genomes|G:0.11523:115:GoNL|G:0.245399:80:HapMap|T:0.495904:1453:KOREAN|T:0.49599:3587:Korea4K|G:0.135:81:NorthernSweden|G:0.101852:22:Qatari|T:0.35461:100:SGDP_PRJ|T:0.454545:10:Siberian|T:0.483291:37428:TOMMO|G:0.204186:54046:TOPMED|G:0.104639:388:…
21	31668014	T>-,TT	delins	11307260	benign	by-frequency;by-alfa;by-cluster	intron_variant	SOD1	T:0.419129:2099:1000Genomes|T:0.422861:2708:1000Genomes_30X|-:0.398547:1536:ALSPAC|-:0.369643:1656:Estonian|-:0.4:16:GENOME_DK|-:0.483493:71995:GnomAD_genomes|-:0.408818:408:GoNL|T:0.115906:838:Korea4K|-:0.388333:233:NorthernSweden|T:0.153819:11897:TOMMO|T:0.498848:132040:TOPMED|-:0.403182:1495:TWINSUK|TT:0.436987:8093:ALFA
21	31668014	T>-,TT	delins	11307260	benign	by-frequency;by-alfa;by-cluster	intron_variant	SOD1	T:0.419129:2099:1000Genomes|T:0.422861:2708:1000Genomes_30X|-:0.398547:1536:ALSPAC|-:0.369643:1656:Estonian|-:0.4:16:GENOME_DK|-:0.483493:71995:GnomAD_genomes|-:0.408818:408:GoNL|T:0.115906:838:Korea4K|-:0.388333:233:NorthernSweden|T:0.153819:11897:TOMMO|T:0.498848:132040:TOPMED|-:0.403182:1495:TWINSUK|TT:0.436987:8093:ALFA
21	31668014	T>-,TT	delins	11307260	benign	by-frequency;by-alfa;by-cluster	intron_variant	SOD1	T:0.419129:2099:1000Genomes|T:0.422861:2708:1000Genomes_30X|-:0.398547:1536:ALSPAC|-:0.369643:1656:Estonian|-:0.4:16:GENOME_DK|-:0.483493:71995:GnomAD_genomes|-:0.408818:408:GoNL|T:0.115906:838:Korea4K|-:0.388333:233:NorthernSweden|T:0.153819:11897:TOMMO|T:0.498848:132040:TOPMED|-:0.403182:1495:TWINSUK|TT:0.436987:8093:ALFA
21	31668014	T>-,TT	delins	11307260	benign	by-frequency;by-alfa;by-cluster	intron_variant	SOD1	T:0.419129:2099:1000Genomes|T:0.422861:2708:1000Genomes_30X|-:0.398547:1536:ALSPAC|-:0.369643:1656:Estonian|-:0.4:16:GENOME_DK|-:0.483493:71995:GnomAD_genomes|-:0.408818:408:GoNL|T:0.115906:838:Korea4K|-:0.388333:233:NorthernSweden|T:0.153819:11897:TOMMO|T:0.498848:132040:TOPMED|-:0.403182:1495:TWINSUK|TT:0.436987:8093:ALFA
21	31668014	T>-,TT	delins	11307260	benign	by-frequency;by-alfa;by-cluster	intron_variant	SOD1	T:0.419129:2099:1000Genomes|T:0.422861:2708:1000Genomes_30X|-:0.398547:1536:ALSPAC|-:0.369643:1656:Estonian|-:0.4:16:GENOME_DK|-:0.483493:71995:GnomAD_genomes|-:0.408818:408:GoNL|T:0.115906:838:Korea4K|-:0.388333:233:NorthernSweden|T:0.153819:11897:TOMMO|T:0.498848:132040:TOPMED|-:0.403182:1495:TWINSUK|TT:0.436987:8093:ALFA
21	31668014	T>-,TT	delins	11307260	benign	by-frequency;by-alfa;by-cluster	intron_variant	SOD1	T:0.419129:2099:1000Genomes|T:0.422861:2708:1000Genomes_30X|-:0.398547:1536:ALSPAC|-:0.369643:1656:Estonian|-:0.4:16:GENOME_DK|-:0.483493:71995:GnomAD_genomes|-:0.408818:408:GoNL|T:0.115906:838:Korea4K|-:0.388333:233:NorthernSweden|T:0.153819:11897:TOMMO|T:0.498848:132040:TOPMED|-:0.403182:1495:TWINSUK|TT:0.436987:8093:ALFA
21	31668014	T>-,TT	delins	11307260	benign	by-frequency;by-alfa;by-cluster	intron_variant	SOD1	T:0.419129:2099:1000Genomes|T:0.422861:2708:1000Genomes_30X|-:0.398547:1536:ALSPAC|-:0.369643:1656:Estonian|-:0.4:16:GENOME_DK|-:0.483493:71995:GnomAD_genomes|-:0.408818:408:GoNL|T:0.115906:838:Korea4K|-:0.388333:233:NorthernSweden|T:0.153819:11897:TOMMO|T:0.498848:132040:TOPMED|-:0.403182:1495:TWINSUK|TT:0.436987:8093:ALFA
21	31668014	T>-,TT	delins	11307260	benign	by-frequency;by-alfa;by-cluster	intron_variant	SOD1	T:0.419129:2099:1000Genomes|T:0.422861:2708:1000Genomes_30X|-:0.398547:1536:ALSPAC|-:0.369643:1656:Estonian|-:0.4:16:GENOME_DK|-:0.483493:71995:GnomAD_genomes|-:0.408818:408:GoNL|T:0.115906:838:Korea4K|-:0.388333:233:NorthernSweden|T:0.153819:11897:TOMMO|T:0.498848:132040:TOPMED|-:0.403182:1495:TWINSUK|TT:0.436987:8093:ALFA
21	31663682	T>A,G	snv	16988404	benign	by-frequency;by-alfa;by-cluster	intron_variant;2KB_upstream_variant;upstream_transcript_variant	SOD1;LOC124900469	A:0.016174:81:1000Genomes|A:0.015147:97:1000Genomes_30X|A:0.043851:169:ALSPAC|A:0.066295:297:Estonian|A:0.033425:4988:GnomAD_genomes|A:0.051102:51:GoNL|A:0.007491:4:MGP|A:0.058333:35:NorthernSweden|A:0.00463:1:Qatari|T:0.4375:7:SGDP_PRJ|T:0.5:2:Siberian|A:0.040992:152:TWINSUK|A:0.00463:1:Vietnamese|A:0.017399:313:ALFA
21	31659509	G>T	snv	17883296	likely-benign	by-frequency;by-alfa;by-cluster	2KB_upstream_variant;upstream_transcript_variant	SOD1	T:0.007388:37:1000Genomes|T:0.007651:49:1000Genomes_30X|T:0.000259:1:ALSPAC|T:0.000736:272:GnomAD_exomes|T:0.006696:1000:GnomAD_genomes|G:0.5:1:SGDP_PRJ|T:0.00799:2115:TOPMED|T:0.:0:TWINSUK|T:0.004577:66:ALFA
21	31666163	AG>-	del	17884464	benign	by-frequency;by-alfa;by-cluster	intron_variant	SOD1	-:0.016374:82:1000Genomes|-:0.015147:97:1000Genomes_30X|-:0.044629:172:ALSPAC|-:0.066295:297:Estonian|-:0.033443:4982:GnomAD_genomes|-:0.051102:51:GoNL|-:0.058333:35:NorthernSweden|-:0.027092:7171:TOPMED|-:0.041262:153:TWINSUK|-:0.043143:799:ALFA
21	31667298	G>A,C,T	snv	121912437	pathogenic;likely-pathogenic	by-frequency;by-alfa;by-cluster	coding_sequence_variant;missense_variant	SOD1	C:0.:0:PAGE_STUDY|T:0.:0:ALFA
21	31666866	AAAAA>-,A,AA,AAA,AAAA,AAAAAA,AAAAAAA,AAAAAAAA	delins	200145715	likely-benign	by-frequency;by-alfa;by-cluster	intron_variant	SOD1	A:0.005:3:NorthernSweden|AAAAAAAA:0.:0:ALFA
21	31666866	AAAAA>-,A,AA,AAA,AAAA,AAAAAA,AAAAAAA,AAAAAAAA	delins	200145715	likely-benign	by-frequency;by-alfa;by-cluster	intron_variant	SOD1	A:0.005:3:NorthernSweden|AAAAAAAA:0.:0:ALFA
21	31666866	AAAAA>-,A,AA,AAA,AAAA,AAAAAA,AAAAAAA,AAAAAAAA	delins	200145715	likely-benign	by-frequency;by-alfa;by-cluster	intron_variant	SOD1	A:0.005:3:NorthernSweden|AAAAAAAA:0.:0:ALFA
21	31668698	C>A	snv	11930		by-cluster	3_prime_UTR_variant	SOD1
21	31668611	A>G	snv	15012		by-frequency;by-alfa;by-cluster	3_prime_UTR_variant	SOD1	G:0.000002:1:GnomAD_exomes|G:0.000007:1:GnomAD_genomes|G:0.:0:ALFA
21	31668663	A>C,G	snv	1050089		by-frequency;by-alfa;by-cluster	3_prime_UTR_variant	SOD1	C:0.000013:1:TOMMO|G:0.000008:2:TOPMED|G:0.:0:ALFA
21	31668681	T>A	snv	1050098		by-cluster	3_prime_UTR_variant	SOD1
21	31668648	T>G	snv	1804448		by-cluster	3_prime_UTR_variant	SOD1
21	31663836	C>T	snv	1804450			coding_sequence_variant;2KB_upstream_variant;missense_variant;upstream_transcript_variant	SOD1;LOC124900469
21	31667462	AA>-,A,AAA	delins	3216079		by-frequency;by-alfa;by-cluster	intron_variant	SOD1	-:0.24501:1227:1000Genomes|-:0.23751:1521:1000Genomes_30X|-:0.05345:206:ALSPAC|-:0.05179:232:Estonian|-:0.125:5:GENOME_DK|-:0.04609:46:GoNL|A:0.49862:3607:Korea4K|-:0.075:45:NorthernSweden|A:0.48286:37387:TOMMO|-:0.05205:193:TWINSUK|AAA:0.01457:234:ALFA
21	31660688	C>G,T	snv	4816405		by-frequency;by-alfa;by-cluster	intron_variant	SOD1	G:0.227436:1139:1000Genomes|G:0.220175:1410:1000Genomes_30X|G:0.065387:252:ALSPAC|G:0.065402:293:Estonian|G:0.125:5:GENOME_DK|G:0.125:2:GnomAD_exomes|G:0.116282:17349:GnomAD_genomes|G:0.064128:64:GoNL|C:0.495222:1451:KOREAN|G:0.076667:46:NorthernSweden|G:0.420455:333:PRJEB37584|G:0.083333:18:Qatari|C:0.383621:89:SGDP_PRJ|C:0.444444:8:Siberian|C:0.479443:37130:TOMMO|G:0.125857:33313:TOPMED|G:0.063…
21	31663326	C>G,T	snv	4816406		by-frequency;by-alfa;by-cluster	intron_variant;2KB_upstream_variant;upstream_transcript_variant	SOD1;LOC124900469	T:0.000156:1:1000Genomes_30X|T:0.000684:2:KOREAN|G:0.000415:3:Korea4K|C:0.5:1:SGDP_PRJ|T:0.000013:1:TOMMO|T:0.000026:7:TOPMED|T:0.:0:ALFA
21	31667716	A>C,G,T	snv	4816407		by-frequency;by-alfa;by-cluster	intron_variant	SOD1	G:0.275559:1380:1000Genomes|G:0.269988:1729:1000Genomes_30X|G:0.053451:206:ALSPAC|G:0.051786:232:Estonian|G:0.125:5:GENOME_DK|G:0.1548:23090:GnomAD_genomes|G:0.046092:46:GoNL|T:0.:0:KOREAN|A:0.498065:3603:Korea4K|G:0.075:45:NorthernSweden|G:0.282291:22205:PAGE_STUDY|G:0.:0:PRJEB36033|G:0.087963:19:Qatari|A:0.359259:97:SGDP_PRJ|A:0.444444:8:Siberian|A:0.483037:37390:TOMMO|G:0.171019:45267:TOPMED|G…
21	31662579	G>A	snv	4998557		by-frequency;by-alfa;by-cluster	intron_variant;2KB_upstream_variant;upstream_transcript_variant	SOD1;LOC124900469	A:0.329073:1648:1000Genomes|A:0.326359:2090:1000Genomes_30X|A:0.109237:421:ALSPAC|A:0.289137:181:Chileans|A:0.128795:577:Estonian|A:0.125:5:GENOME_DK|A:0.226275:33715:GnomAD_genomes|A:0.116232:116:GoNL|G:0.496587:1455:KOREAN|G:0.498756:3607:Korea4K|A:0.135:81:NorthernSweden|A:0.115741:25:Qatari|G:0.349315:102:SGDP_PRJ|G:0.454545:10:Siberian|G:0.483149:37417:TOMMO|A:0.239813:63476:TOPMED|A:0.10544…
21	31660675	C>A,G	snv	6650814		by-frequency;by-alfa;by-cluster	intron_variant	SOD1	A:0.099241:497:1000Genomes|A:0.103685:664:1000Genomes_30X|A:0.044629:172:ALSPAC|A:0.063616:285:Estonian|A:0.:0:GnomAD_exomes|A:0.052104:52:GoNL|A:0.058333:35:NorthernSweden|A:0.032407:7:Qatari|C:0.3:21:SGDP_PRJ|C:0.5:2:Siberian|A:0.114028:30182:TOPMED|A:0.042341:157:TWINSUK|A:0.004717:1:Vietnamese|A:0.036502:622:ALFA
21	31662385	A>G	snv	7510525		by-frequency	intron_variant;2KB_upstream_variant;upstream_transcript_variant	SOD1;LOC124900469	G:0.:0:HapMap
21	31666034	C>A,G,T	snv	8133032		by-frequency;by-alfa;by-cluster	intron_variant	SOD1	A:0.248403:1244:1000Genomes|A:0.240787:1542:1000Genomes_30X|A:0.064608:249:ALSPAC|A:0.064509:289:Estonian|A:0.125:5:GENOME_DK|A:0.064128:64:GoNL|C:0.496246:1454:KOREAN|A:0.498749:3588:Korea4K|A:0.076667:46:NorthernSweden|A:0.092593:20:Qatari|C:0.376:94:SGDP_PRJ|C:0.5:7:Siberian|C:0.483586:37445:TOMMO|A:0.146571:38796:TOPMED|A:0.063646:236:TWINSUK|C:0.490385:102:Vietnamese|T:0.:0:ALFA
21	31665169	A>G,T	snv	9967983		by-frequency;by-alfa;by-cluster	intron_variant	SOD1	A:0.430112:2154:1000Genomes|T:0.400882:1545:ALSPAC|T:0.379911:1702:Estonian|T:0.4:16:GENOME_DK|T:0.476892:70808:GnomAD_genomes|T:0.058116:58:GoNL|A:0.140614:412:KOREAN|A:0.151134:1093:Korea4K|T:0.408333:245:NorthernSweden|A:0.444444:96:Qatari|A:0.264706:117:SGDP_PRJ|A:0.333333:18:Siberian|A:0.170652:13216:TOMMO|T:0.492414:130337:TOPMED|T:0.406688:1508:TWINSUK|T:0.43568:8230:ALFA
21	31667264	T>C	snv	11556619			coding_sequence_variant;synonymous_variant	SOD1
21	31663803	C>G	snv	11556621		by-frequency;by-cluster	coding_sequence_variant;2KB_upstream_variant;missense_variant;upstream_transcript_variant	SOD1;LOC124900469	G:0.0002595:1:ALSPAC|G:0.0000079:11:GnomAD_exomes|G:0.0000129:1:TOMMO|G:0.:0:TWINSUK
21	31668632	C>A,T	snv	11556622		by-frequency;by-cluster	3_prime_UTR_variant	SOD1	A:0.000009:4:GnomAD_exomes
21	31665251	A>G	snv	11567845		by-frequency;by-alfa;by-cluster	intron_variant	SOD1	G:0.247404:1239:1000Genomes|G:0.245784:1574:1000Genomes_30X|G:0.29917:1153:ALSPAC|G:0.277232:1242:Estonian|G:0.3:12:GENOME_DK|G:0.256571:38247:GnomAD_genomes|G:0.306613:306:GoNL|G:0.387713:1136:KOREAN|G:0.387555:710:Korea1K|G:0.378905:2741:Korea4K|G:0.288333:173:NorthernSweden|G:0.430556:93:Qatari|A:0.40625:91:SGDP_PRJ|A:0.404762:17:Siberian|G:0.329115:25488:TOMMO|G:0.257335:68114:TOPMED|G:0.3079…
21	31657777	A>C	snv	11910115		by-frequency;by-alfa;by-cluster	2KB_upstream_variant;upstream_transcript_variant	SOD1	C:0.041134:206:1000Genomes|C:0.04466:286:1000Genomes_30X|C:0.037545:5602:GnomAD_genomes|C:0.046012:15:HapMap|C:0.013889:3:Qatari|A:0.323529:11:SGDP_PRJ|C:0.041807:11066:TOPMED|C:0.020131:689:ALFA
21	31664682	G>A	snv	12482567		by-frequency;by-alfa;by-cluster	intron_variant;500B_downstream_variant;downstream_transcript_variant	SOD1;LOC124900469	A:0.000141:21:GnomAD_genomes|A:0.000166:44:TOPMED|A:0.:0:ALFA
21	31668827	T>C	snv	16988412		by-frequency;by-alfa;by-cluster	3_prime_UTR_variant	SOD1	C:0.000446:2:Estonian|C:0.000138:42:GnomAD_exomes|C:0.000067:10:GnomAD_genomes|C:0.000049:13:TOPMED|C:0.000162:3:ALFA
21	31661790	C>G,T	snv	17878802		by-frequency;by-alfa;by-cluster	intron_variant	SOD1	G:0.02955:148:1000Genomes|G:0.03139:201:1000Genomes_30X|G:0.00463:1:Qatari|C:0.29167:7:SGDP_PRJ|G:0.00029:4:ALFA
21	31668283	T>C	snv	17880044		by-frequency;by-alfa;by-cluster	intron_variant	SOD1	C:0.005391:27:1000Genomes|C:0.005621:36:1000Genomes_30X|C:0.002595:10:ALSPAC|C:0.00067:3:Estonian|C:0.002358:352:GnomAD_genomes|C:0.006012:6:GoNL|C:0.023148:5:Qatari|T:0.5:4:SGDP_PRJ|C:0.002203:583:TOPMED|C:0.000809:3:TWINSUK|C:0.002065:39:ALFA
21	31662398	TTG>-,TTGTTG	delins	17880208		by-frequency;by-alfa;by-cluster	intron_variant;2KB_upstream_variant;upstream_transcript_variant	SOD1;LOC124900469	-:0.007588:38:1000Genomes|-:0.007964:51:1000Genomes_30X|-:0.006759:1009:GnomAD_genomes|-:0.001002:1:GoNL|-:0.007979:2112:TOPMED|TG:0.006121:86:ALFA
21	31662634	T>G	snv	17880227		by-frequency;by-alfa;by-cluster	intron_variant;2KB_upstream_variant;upstream_transcript_variant	SOD1;LOC124900469	G:0.001997:10:1000Genomes|G:0.002342:15:1000Genomes_30X|G:0.000221:33:GnomAD_genomes|T:0.5:1:SGDP_PRJ|G:0.000026:7:TOPMED|G:0.:0:ALFA
21	31666763	T>C	snv	17880318		by-frequency;by-alfa;by-cluster	intron_variant	SOD1	C:0.001398:7:1000Genomes|C:0.001249:8:1000Genomes_30X|C:0.000024:9:GnomAD_exomes|C:0.000362:54:GnomAD_genomes|T:0.5:2:SGDP_PRJ|C:0.000302:80:TOPMED|C:0.000208:3:ALFA
21	31661386	C>G	snv	17880326		by-frequency;by-alfa;by-cluster	intron_variant	SOD1	G:0.000399:2:1000Genomes|G:0.000312:2:1000Genomes_30X|G:0.000817:122:GnomAD_genomes|G:0.000956:253:TOPMED|G:0.000569:8:ALFA
21	31665447	C>A,T	snv	17880439		by-frequency;by-alfa;by-cluster	intron_variant	SOD1	A:0.002396:12:1000Genomes|A:0.002498:16:1000Genomes_30X|A:0.002681:400:GnomAD_genomes|C:0.25:2:SGDP_PRJ|T:0.:0:ALFA
21	31664586	G>A	snv	17880490		by-frequency;by-alfa;by-cluster	intron_variant;500B_downstream_variant;downstream_transcript_variant	SOD1;LOC124900469	A:0.003794:19:1000Genomes|A:0.004216:27:1000Genomes_30X|A:0.002453:366:GnomAD_genomes|A:0.00463:1:Qatari|G:0.5:1:SGDP_PRJ|A:0.002762:731:TOPMED|A:0.001664:24:ALFA
21	31660769	G>C	snv	17880795		by-frequency;by-alfa;by-cluster	intron_variant	SOD1	C:0.000998:5:1000Genomes|C:0.000781:5:1000Genomes_30X|C:0.000864:129:GnomAD_genomes|G:0.5:1:SGDP_PRJ|C:0.001118:296:TOPMED|C:0.000832:12:ALFA
21	31660787	A>G	snv	17881051		by-frequency;by-alfa;by-cluster	intron_variant	SOD1	G:0.001398:7:1000Genomes|G:0.001249:8:1000Genomes_30X|G:0.000362:54:GnomAD_genomes|A:0.5:1:SGDP_PRJ|G:0.000298:79:TOPMED|G:0.000208:3:ALFA
21	31665335	T>G	snv	17881135		by-frequency;by-alfa;by-cluster	intron_variant	SOD1	G:0.:0:ALFA
21	31664692	CTGCAAGCTCCGCCTCCCGGGTTCATGCCA>-	delins	17881254		by-frequency;by-alfa;by-cluster	intron_variant;500B_downstream_variant;downstream_transcript_variant	SOD1;LOC124900469	-:0.000148:22:GnomAD_genomes|-:0.000151:40:TOPMED|CA:0.000142:2:ALFA
21	31658867	C>T	snv	17881274		by-frequency;by-alfa;by-cluster	2KB_upstream_variant;upstream_transcript_variant	SOD1	T:0.095647:479:1000Genomes|T:0.101031:647:1000Genomes_30X|T:0.044369:171:ALSPAC|T:0.063616:285:Estonian|T:0.10784:16090:GnomAD_genomes|T:0.052104:52:GoNL|T:0.000546:1:Korea1K|T:0.000138:1:Korea4K|T:0.058333:35:NorthernSweden|T:0.032407:7:Qatari|C:0.387097:24:SGDP_PRJ|C:0.5:2:Siberian|T:0.11059:29272:TOPMED|T:0.040992:152:TWINSUK|T:0.073324:2249:ALFA
21	31667941	T>G	snv	17881296		by-frequency;by-alfa;by-cluster	intron_variant	SOD1	G:0.0002:1:1000Genomes|G:0.000312:2:1000Genomes_30X|G:0.003373:13:ALSPAC|G:0.002232:10:Estonian|G:0.001795:268:GnomAD_genomes|G:0.004008:4:GoNL|G:0.001897:502:TOPMED|G:0.004045:15:TWINSUK|G:0.002435:46:ALFA
21	31660758	C>G,T	snv	17881415		by-frequency;by-alfa;by-cluster	intron_variant	SOD1	G:0.0006:3:1000Genomes|G:0.00062:4:1000Genomes_30X|G:0.00007:1:ALFA
21	31659680	G>A,C,T	snv	17881581		by-frequency;by-alfa;by-cluster	2KB_upstream_variant;upstream_transcript_variant	SOD1	A:0.001198:6:1000Genomes|A:0.000937:6:1000Genomes_30X|C:0.000223:1:Estonian|A:0.000964:144:GnomAD_genomes|C:0.000024:1:ALFA
21	31664590	->A	delins	17881671		by-frequency;by-alfa;by-cluster	intron_variant;500B_downstream_variant;downstream_transcript_variant	SOD1;LOC124900469	A:0.001398:7:1000Genomes|A:0.001718:11:1000Genomes_30X|A:0.000422:63:GnomAD_genomes|A:0.000138:1:Korea4K|A:0.000116:9:TOMMO|A:0.000457:121:TOPMED|A:0.00463:1:Vietnamese|AA:0.:0:ALFA
21	31658487	C>T	snv	17881711		by-frequency;by-alfa;by-cluster	2KB_upstream_variant;upstream_transcript_variant	SOD1	T:0.004593:23:1000Genomes|T:0.004216:27:1000Genomes_30X|T:0.004831:721:GnomAD_genomes|T:0.005848:1548:TOPMED|T:0.005409:78:ALFA
21	31661858	A>G	snv	17881807		by-frequency;by-alfa;by-cluster	intron_variant	SOD1	G:0.006989:35:1000Genomes|G:0.006715:43:1000Genomes_30X|G:0.007802:1165:GnomAD_genomes|G:0.00463:1:Qatari|A:0.5:4:SGDP_PRJ|G:0.009033:2391:TOPMED|G:0.00749:108:ALFA
21	31658972	T>C	snv	17882503		by-frequency;by-alfa;by-cluster	2KB_upstream_variant;upstream_transcript_variant	SOD1	C:0.024561:123:1000Genomes|C:0.02639:169:1000Genomes_30X|C:0.019714:2944:GnomAD_genomes|C:0.00463:1:Qatari|T:0.416667:5:SGDP_PRJ|C:0.02203:5831:TOPMED|C:0.0054:201:ALFA
21	31661515	C>T	snv	17882967		by-frequency;by-alfa;by-cluster	intron_variant	SOD1	T:0.004593:23:1000Genomes|T:0.004216:27:1000Genomes_30X|T:0.023093:89:ALSPAC|T:0.005804:26:Estonian|T:0.010973:1638:GnomAD_genomes|T:0.013026:13:GoNL|T:0.005:3:NorthernSweden|C:0.5:3:SGDP_PRJ|T:0.011387:3014:TOPMED|T:0.019417:72:TWINSUK|T:0.012811:242:ALFA
21	31664852	G>A	snv	17882986		by-frequency;by-alfa;by-cluster	intron_variant;500B_downstream_variant;downstream_transcript_variant	SOD1;LOC124900469	A:0.000275:41:GnomAD_genomes|G:0.333333:2:SGDP_PRJ|A:0.000242:64:TOPMED|A:0.:0:ALFA
21	31659220	G>A	snv	17882997		by-frequency;by-alfa;by-cluster	2KB_upstream_variant;upstream_transcript_variant	SOD1	A:0.000008:2:TOPMED|A:0.:0:ALFA
21	31665054	C>A,G	snv	17883222		by-frequency;by-alfa;by-cluster	intron_variant	SOD1	A:0.000007:1:GnomAD_genomes|A:0.000004:1:TOPMED|A:0.:0:ALFA
21	31661769	C>G,T	snv	17883270		by-frequency;by-alfa;by-cluster	intron_variant	SOD1	G:0.007588:38:1000Genomes|G:0.007964:51:1000Genomes_30X|G:0.001002:1:GoNL|C:0.5:3:SGDP_PRJ|T:0.000232:18:TOMMO|G:0.007968:2109:TOPMED|G:0.00007:1:ALFA
21	31664719	T>C	snv	17883461		by-frequency;by-alfa;by-cluster	intron_variant;500B_downstream_variant;downstream_transcript_variant	SOD1;LOC124900469	C:0.005391:27:1000Genomes|C:0.00609:39:1000Genomes_30X|C:0.004603:686:GnomAD_genomes|T:0.25:2:SGDP_PRJ|C:0.000026:2:TOMMO|C:0.005629:1490:TOPMED|C:0.004785:69:ALFA
21	31666198	T>A	snv	17883733		by-frequency;by-alfa;by-cluster	intron_variant	SOD1	A:0.000007:1:GnomAD_genomes|A:0.:0:ALFA
21	31666362	T>C	snv	17883998		by-frequency;by-alfa;by-cluster	intron_variant	SOD1	C:0.000399:2:1000Genomes|C:0.000312:2:1000Genomes_30X|C:0.000114:90:GnomAD_exomes|C:0.001172:175:GnomAD_genomes|C:0.001303:345:TOPMED|C:0.000712:10:ALFA
21	31660757	A>G	snv	17884040		by-frequency;by-alfa;by-cluster	intron_variant	SOD1	G:0.000399:2:1000Genomes|G:0.000781:5:1000Genomes_30X|G:0.000121:18:GnomAD_genomes|G:0.003072:9:KOREAN|G:0.004367:8:Korea1K|G:0.003456:25:Korea4K|A:0.5:1:SGDP_PRJ|G:0.002169:168:TOMMO|G:0.000212:56:TOPMED|G:0.004717:1:Vietnamese|G:0.:0:ALFA
21	31664502	AGA>-	delins	17884057		by-frequency;by-alfa;by-cluster	intron_variant;500B_downstream_variant;downstream_transcript_variant	SOD1;LOC124900469	-:0.085463:428:1000Genomes|-:0.086821:556:1000Genomes_30X|-:0.156461:603:ALSPAC|-:0.148214:664:Estonian|-:0.175:7:GENOME_DK|-:0.126927:461:GnomAD_exomes|-:0.127736:19048:GnomAD_genomes|-:0.176353:176:GoNL|-:0.004367:8:Korea1K|-:0.003872:28:Korea4K|-:0.156667:94:NorthernSweden|-:0.004855:376:TOMMO|-:0.122468:32416:TOPMED|-:0.168015:623:TWINSUK|AGAAGA:0.143629:2660:ALFA
21	31660583	T>G	snv	17884260		by-frequency;by-alfa;by-cluster	intron_variant	SOD1	G:0.002596:13:1000Genomes|G:0.002967:19:1000Genomes_30X|G:0.002291:342:GnomAD_genomes|G:0.00463:1:Qatari|G:0.002614:692:TOPMED|G:0.00094:24:ALFA
21	31668198	G>A	snv	17884462		by-frequency;by-alfa;by-cluster	intron_variant	SOD1	A:0.001997:10:1000Genomes|A:0.002186:14:1000Genomes_30X|A:0.002526:377:GnomAD_genomes|A:0.000026:2:TOMMO|A:0.003215:851:TOPMED|A:0.00184:47:ALFA
21	31661410	C>G,T	snv	17885219		by-frequency;by-alfa;by-cluster	intron_variant	SOD1	T:0.014377:72:1000Genomes|T:0.013585:87:1000Genomes_30X|T:0.000446:2:Estonian|T:0.003449:515:GnomAD_genomes|T:0.100683:295:KOREAN|T:0.091703:168:Korea1K|T:0.095521:691:Korea4K|C:0.5:11:SGDP_PRJ|C:0.5:2:Siberian|T:0.091085:7054:TOMMO|T:0.005712:1512:TOPMED|T:0.028302:6:Vietnamese|T:0.001641:31:ALFA
21	31665557	C>G,T	snv	17885303		by-frequency;by-alfa;by-cluster	intron_variant	SOD1	T:0.003195:16:1000Genomes|T:0.002967:19:1000Genomes_30X|T:0.01479:57:ALSPAC|T:0.009821:44:Estonian|T:0.025:1:GENOME_DK|T:0.009893:1476:GnomAD_genomes|T:0.017034:17:GoNL|T:0.012:6:HapMap|T:0.021667:13:NorthernSweden|T:0.018519:4:Qatari|C:0.5:2:SGDP_PRJ|T:0.009494:2513:TOPMED|T:0.012675:47:TWINSUK|T:0.006769:163:ALFA
21	31659731	A>C,G	snv	17885940		by-frequency;by-alfa;by-cluster	5_prime_UTR_variant	SOD1	G:0.000007:1:GnomAD_genomes|G:0.000077:1:GoESP|G:0.000008:2:TOPMED|G:0.:0:ALFA
21	31664641	C>T	snv	17886025		by-frequency;by-alfa;by-cluster	intron_variant;500B_downstream_variant;downstream_transcript_variant	SOD1;LOC124900469	T:0.001198:6:1000Genomes|T:0.00203:13:1000Genomes_30X|T:0.002595:10:ALSPAC|T:0.001563:7:Estonian|T:0.002298:342:GnomAD_genomes|T:0.00501:5:GoNL|C:0.:0:SGDP_PRJ|T:0.000039:3:TOMMO|T:0.002618:693:TOPMED|T:0.002697:10:TWINSUK|T:0.002435:46:ALFA
21	31658552	T>C	snv	17886051		by-frequency;by-alfa;by-cluster	2KB_upstream_variant;upstream_transcript_variant	SOD1	C:0.000399:2:1000Genomes|C:0.000468:3:1000Genomes_30X|C:0.000033:5:GnomAD_genomes|C:0.000008:2:TOPMED|C:0.:0:ALFA
21	31664837	C>G,T	snv	17886606		by-frequency;by-alfa;by-cluster	intron_variant;500B_downstream_variant;downstream_transcript_variant	SOD1;LOC124900469	G:0.007588:38:1000Genomes|G:0.007964:51:1000Genomes_30X|G:0.006767:1009:GnomAD_genomes|G:0.001002:1:GoNL|C:0.5:3:SGDP_PRJ|G:0.007975:2111:TOPMED|G:0.00007:1:ALFA
21	31661467	A>C,G	snv	17886658		by-frequency;by-alfa;by-cluster	intron_variant	SOD1	C:0.000027:4:GnomAD_genomes|C:0.000013:1:TOMMO|C:0.000019:5:TOPMED|G:0.:0:ALFA
21	31659065	A>G	snv	17886748		by-frequency;by-alfa;by-cluster	2KB_upstream_variant;upstream_transcript_variant	SOD1	G:0.000259:1:ALSPAC|G:0.000054:8:GnomAD_genomes|G:0.00003:8:TOPMED|G:0.:0:TWINSUK|G:0.:0:ALFA
21	31669212	TT>-,T	delins	34075558		by-frequency;by-alfa;by-cluster	500B_downstream_variant;downstream_transcript_variant	SOD1	-:0.00002:3:GnomAD_genomes|-:0.000004:1:TOPMED|TTT:0.:0:ALFA
21	31669340	A>-	delins	34576531			500B_downstream_variant;downstream_transcript_variant	SOD1
21	31669374	->A	delins	34871028			500B_downstream_variant;downstream_transcript_variant	SOD1
21	31668315	->C	ins	35008456			intron_variant	SOD1
21	31667850	->C	delins	35497195			intron_variant	SOD1
21	31668107	T>-	delins	35816372		by-cluster	intron_variant	SOD1
21	31668161	->G	delins	35856206			intron_variant	SOD1
21	31658738	->C	delins	35984269			2KB_upstream_variant;upstream_transcript_variant	SOD1
21	31664071	G>-	delins	36060566			intron_variant;2KB_upstream_variant;upstream_transcript_variant	SOD1;LOC124900469
21	31660583	T>-	delins	36092510			intron_variant	SOD1
21	31658221	G>A	snv	36232791		by-frequency;by-alfa;by-cluster	2KB_upstream_variant;upstream_transcript_variant	SOD1	A:0.000027:4:GnomAD_genomes|A:0.001712:5:KOREAN|A:0.001106:8:Korea4K|A:0.000052:4:TOMMO|A:0.000015:4:TOPMED|A:0.:0:ALFA
21	31658036	GCCCAGTAAAGCATGGGGCCTGGGGCCAGGGACCCCCTTGTTCAGGTGTG>-	delins	36232792		by-frequency;by-alfa;by-cluster	2KB_upstream_variant;upstream_transcript_variant	SOD1	-:0.100874:646:1000Genomes_30X|-:0.184375:826:Estonian|-:0.225:9:GENOME_DK|-:0.368421:14:GnomAD_exomes|-:0.138089:20556:GnomAD_genomes|-:0.203333:122:NorthernSweden|G:0.149522:2442:ALFA
21	31658872	A>C	snv	36232793		by-frequency;by-alfa;by-cluster	2KB_upstream_variant;upstream_transcript_variant	SOD1	C:0.000399:2:1000Genomes|C:0.000468:3:1000Genomes_30X|C:0.000683:102:GnomAD_genomes|A:0.416667:5:SGDP_PRJ|C:0.000207:16:TOMMO|C:0.000612:162:TOPMED|C:0.000214:3:ALFA
21	31659521	C>A,G,T	snv	36233086		by-frequency;by-alfa;by-cluster	2KB_upstream_variant;upstream_transcript_variant	SOD1	G:0.001797:9:1000Genomes|G:0.001718:11:1000Genomes_30X|G:0.000259:1:ALSPAC|G:0.002037:304:GnomAD_genomes|G:0.002384:631:TOPMED|G:0.:0:TWINSUK|T:0.:0:ALFA
21	31659516	G>A,T	snv	36233087		by-frequency;by-alfa;by-cluster	2KB_upstream_variant;upstream_transcript_variant	SOD1	T:0.0016:8:1000Genomes|T:0.00172:11:1000Genomes_30X|T:0.:0:ALFA
21	31659258	A>C,G	snv	36233089		by-frequency;by-alfa;by-cluster	2KB_upstream_variant;upstream_transcript_variant	SOD1	G:0.000156:1:1000Genomes_30X|C:0.000282:1:GnomAD_exomes|G:0.000382:57:GnomAD_genomes|A:0.5:1:SGDP_PRJ|G:0.000348:92:TOPMED|G:0.000214:3:ALFA
21	31657962	C>A,G,T	snv	36233090		by-frequency;by-alfa;by-cluster	2KB_upstream_variant;upstream_transcript_variant	SOD1	G:0.09585:480:1000Genomes|G:0.06362:285:Estonian|G:0.125:3:GnomAD_exomes|G:0.0521:52:GoNL|G:0.05833:35:NorthernSweden|G:0.03241:7:Qatari|C:0.35:21:SGDP_PRJ|C:0.5:2:Siberian|G:0.00463:1:Vietnamese|T:0.:0:ALFA
21	31657898	A>C	snv	36233091		by-frequency;by-alfa;by-cluster	2KB_upstream_variant;upstream_transcript_variant	SOD1	C:0.000027:4:GnomAD_genomes|A:0.5:1:SGDP_PRJ|C:0.000004:1:TOPMED|C:0.:0:ALFA
21	31668635	T>C	snv	41391245		by-frequency;by-alfa;by-cluster	3_prime_UTR_variant	SOD1	C:0.0002:1:1000Genomes|C:0.000156:1:1000Genomes_30X|C:0.000004:4:GnomAD_exomes|C:0.000013:2:GnomAD_genomes|C:0.000004:1:TOPMED|C:0.:0:ALFA
21	31658844	G>A	snv	60229153		by-frequency;by-alfa;by-cluster	2KB_upstream_variant;upstream_transcript_variant	SOD1	A:0.001198:6:1000Genomes|A:0.001405:9:1000Genomes_30X|A:0.000509:76:GnomAD_genomes|A:0.014031:41:KOREAN|A:0.017003:123:Korea4K|G:0.5:1:SGDP_PRJ|A:0.014049:1088:TOMMO|A:0.00071:188:TOPMED|A:0.009434:2:Vietnamese|A:0.000069:1:ALFA
21	31665465	G>T	snv	75033976			intron_variant	SOD1
21	31667387	T>C,G	snv	76067399		by-cluster	intron_variant	SOD1
21	31665033	C>G,T	snv	76067554		by-frequency;by-alfa;by-cluster	intron_variant	SOD1	G:0.003:15:1000Genomes|G:0.00328:21:1000Genomes_30X|G:0.0154:45:KOREAN|G:0.01769:128:Korea4K|C:0.5:3:SGDP_PRJ|G:0.01262:977:TOMMO|T:0.:0:ALFA
21	31666393	T>A,C	snv	77112488		by-frequency;by-alfa;by-cluster	intron_variant	SOD1	C:0.0002:1:1000Genomes|C:0.000156:1:1000Genomes_30X|C:0.00004:6:GnomAD_genomes|C:0.002738:8:KOREAN|C:0.001092:2:Korea1K|C:0.002212:16:Korea4K|C:0.004997:387:TOMMO|C:0.000008:2:TOPMED|C:0.:0:ALFA
21	31658409	G>A,C	snv	77198783		by-frequency;by-alfa;by-cluster	2KB_upstream_variant;upstream_transcript_variant	SOD1	C:0.002796:14:1000Genomes|C:0.002342:15:1000Genomes_30X|C:0.000576:86:GnomAD_genomes|C:0.017112:50:KOREAN|C:0.016376:30:Korea1K|C:0.015621:113:Korea4K|G:0.5:5:SGDP_PRJ|C:0.007218:559:TOMMO|C:0.00463:1:Vietnamese|C:0.:0:ALFA
21	31658035	GGCCCAGTAAAGCATGGGGCCTGGGGCCAGGGACCCCCTTGTTCAGGTGTG>-	delins	78194338			2KB_upstream_variant;upstream_transcript_variant	SOD1
21	31665325	A>G	snv	78694163		by-frequency;by-alfa;by-cluster	intron_variant	SOD1	G:0.001198:6:1000Genomes|G:0.000937:6:1000Genomes_30X|G:0.000141:21:GnomAD_genomes|G:0.001369:4:KOREAN|G:0.001638:3:Korea1K|G:0.00235:17:Korea4K|G:0.021486:1664:TOMMO|G:0.000038:10:TOPMED|G:0.:0:ALFA
21	31669290	TAC>-,TACTAC	delins	79346563		by-frequency;by-alfa;by-cluster	500B_downstream_variant;downstream_transcript_variant	SOD1	-:0.009984:50:1000Genomes|-:0.009994:64:1000Genomes_30X|-:0.022055:85:ALSPAC|-:0.025893:116:Estonian|-:0.05:2:GENOME_DK|-:0.016837:2514:GnomAD_genomes|-:0.019038:19:GoNL|-:0.016667:10:NorthernSweden|-:0.013457:3562:TOPMED|-:0.022114:82:TWINSUK|C:0.020248:375:ALFA
21	31668861	C>A,G	snv	80002015		by-frequency;by-cluster	3_prime_UTR_variant	SOD1	A:0.0033:6:Korea1K
21	31667309	T>A,C	snv	111229903		by-frequency;by-alfa;by-cluster	coding_sequence_variant;missense_variant;synonymous_variant	SOD1	A:0.0002:1:1000Genomes|A:0.000156:1:1000Genomes_30X|C:0.000008:1:ExAC|A:0.000007:1:GnomAD_genomes|C:0.:0:ALFA
21	31666520	T>A,C	snv	111273304		by-frequency;by-alfa;by-cluster	splice_donor_variant	SOD1	C:0.000007:1:GnomAD_genomes|C:0.000008:2:TOPMED|C:0.:0:ALFA
21	31668168	T>C	snv	111568696		by-frequency;by-cluster	intron_variant	SOD1	C:0.00034:1:KOREAN|C:0.00014:1:Korea4K|C:0.00012:9:TOMMO
21	31663381	T>C	snv	111985840			intron_variant;2KB_upstream_variant;upstream_transcript_variant	SOD1;LOC124900469
21	31659583	C>A	snv	112510394		by-frequency;by-cluster	2KB_upstream_variant;upstream_transcript_variant	SOD1	A:0.000002:1:GnomAD_exomes
21	31667193	C>A,G	snv	112989936		by-frequency;by-alfa;by-cluster	intron_variant	SOD1	G:0.0002:1:1000Genomes|G:0.000156:1:1000Genomes_30X|G:0.000007:1:GnomAD_genomes|G:0.000004:1:TOPMED|G:0.:0:ALFA
21	31663279	G>T	snv	113056422			intron_variant;2KB_upstream_variant;upstream_transcript_variant	SOD1;LOC124900469
21	31658288	T>C	snv	113869573		by-frequency;by-alfa;by-cluster	2KB_upstream_variant;upstream_transcript_variant	SOD1	C:0.000998:5:1000Genomes|C:0.000937:6:1000Genomes_30X|C:0.001406:210:GnomAD_genomes|T:0.5:2:SGDP_PRJ|C:0.001492:395:TOPMED|C:0.000832:12:ALFA
21	31660544	C>T	snv	114905802		by-frequency;by-alfa;by-cluster	intron_variant	SOD1	T:0.004393:22:1000Genomes|T:0.004528:29:1000Genomes_30X|T:0.002974:444:GnomAD_genomes|C:0.5:1:SGDP_PRJ|T:0.003113:824:TOPMED|T:0.002219:32:ALFA
21	31663443	T>G	snv	116038502		by-frequency;by-alfa;by-cluster	intron_variant;2KB_upstream_variant;upstream_transcript_variant	SOD1;LOC124900469	G:0.000399:2:1000Genomes|G:0.000468:3:1000Genomes_30X|G:0.000629:94:GnomAD_genomes|G:0.000559:148:TOPMED|G:0.000285:4:ALFA
21	31663343	A>G	snv	116260263		by-frequency;by-alfa;by-cluster	intron_variant;2KB_upstream_variant;upstream_transcript_variant	SOD1;LOC124900469	G:0.001997:10:1000Genomes|G:0.001874:12:1000Genomes_30X|G:0.000831:124:GnomAD_genomes|G:0.000945:250:TOPMED|G:0.000832:12:ALFA
21	31667750	T>C	snv	117466144		by-frequency;by-alfa;by-cluster	intron_variant	SOD1	C:0.000399:2:1000Genomes|C:0.000312:2:1000Genomes_30X|C:0.000027:4:GnomAD_genomes|C:0.001711:5:KOREAN|C:0.001092:2:Korea1K|C:0.001659:12:Korea4K|C:0.007505:581:TOMMO|C:0.000015:4:TOPMED|C:0.:0:ALFA
21	31665645	C>T	snv	118132937		by-frequency;by-alfa;by-cluster	intron_variant	SOD1	T:0.002796:14:1000Genomes|T:0.003279:21:1000Genomes_30X|T:0.013233:51:ALSPAC|T:0.013839:62:Estonian|T:0.007886:1177:GnomAD_genomes|T:0.012024:12:GoNL|T:0.008333:5:NorthernSweden|C:0.5:1:SGDP_PRJ|T:0.007802:2065:TOPMED|T:0.016181:60:TWINSUK|T:0.009953:191:ALFA
21	31660582	C>A,G,T	snv	138002121		by-frequency;by-alfa;by-cluster	intron_variant	SOD1	G:0.003594:18:1000Genomes|G:0.002811:18:1000Genomes_30X|G:0.007525:29:ALSPAC|G:0.006696:30:Estonian|G:0.075:3:GENOME_DK|G:0.005328:795:GnomAD_genomes|G:0.01503:15:GoNL|G:0.005:3:NorthernSweden|G:0.00463:1:Qatari|C:0.5:1:SGDP_PRJ|A:0.000013:1:TOMMO|G:0.004216:1116:TOPMED|G:0.007821:29:TWINSUK|G:0.005982:113:ALFA
21	31666119	G>A	snv	138116676		by-frequency;by-alfa;by-cluster	intron_variant	SOD1	A:0.000599:3:1000Genomes|A:0.000625:4:1000Genomes_30X|A:0.005449:21:ALSPAC|A:0.002009:9:Estonian|A:0.025:1:GENOME_DK|A:0.0039:581:GnomAD_genomes|A:0.01002:10:GoNL|A:0.035:21:NorthernSweden|G:0.5:2:SGDP_PRJ|G:0.5:2:Siberian|A:0.000039:3:TOMMO|A:0.003396:899:TOPMED|A:0.0089:33:TWINSUK|A:0.003494:66:ALFA
21	31669364	T>C	snv	138145697		by-frequency;by-alfa;by-cluster	500B_downstream_variant;downstream_transcript_variant	SOD1	C:0.0002:1:1000Genomes|C:0.000156:1:1000Genomes_30X|C:0.:0:ALSPAC|C:0.000007:1:GnomAD_genomes|C:0.000008:2:TOPMED|C:0.00027:1:TWINSUK|C:0.000071:1:ALFA
21	31669191	G>A	snv	138446004		by-frequency;by-alfa;by-cluster	500B_downstream_variant;downstream_transcript_variant	SOD1	A:0.000599:3:1000Genomes|A:0.000937:6:1000Genomes_30X|A:0.002335:9:ALSPAC|A:0.000446:2:Estonian|A:0.001956:292:GnomAD_genomes|A:0.007014:7:GoNL|A:0.003333:2:NorthernSweden|A:0.001844:488:TOPMED|A:0.002697:10:TWINSUK|A:0.000679:13:ALFA
21	31661710	A>G	snv	139355900		by-frequency;by-alfa;by-cluster	intron_variant	SOD1	G:0.000599:3:1000Genomes|G:0.000468:3:1000Genomes_30X|G:0.001297:5:ALSPAC|G:0.000223:1:Estonian|G:0.001139:170:GnomAD_genomes|G:0.000052:4:TOMMO|G:0.001171:310:TOPMED|G:0.002157:8:TWINSUK|G:0.001059:20:ALFA
21	31661966	C>A	snv	139595278		by-frequency;by-alfa;by-cluster	intron_variant	SOD1	A:0.0002:1:1000Genomes|A:0.000312:2:1000Genomes_30X|A:0.001297:5:ALSPAC|A:0.000223:1:Estonian|A:0.000509:76:GnomAD_genomes|A:0.000688:182:TOPMED|A:0.00027:1:TWINSUK|A:0.000582:11:ALFA
21	31666316	G>C,T	snv	139631980		by-frequency;by-alfa;by-cluster	intron_variant	SOD1	C:0.000799:4:1000Genomes|C:0.000625:4:1000Genomes_30X|C:0.000121:18:GnomAD_genomes|C:0.001027:3:KOREAN|C:0.001106:8:Korea4K|C:0.000956:74:TOMMO|C:0.000128:34:TOPMED|C:0.00463:1:Vietnamese|C:0.:0:ALFA
21	31658813	C>A,T	snv	140557191		by-frequency;by-alfa;by-cluster	2KB_upstream_variant;upstream_transcript_variant	SOD1	T:0.001398:7:1000Genomes|T:0.001093:7:1000Genomes_30X|T:0.000778:3:ALSPAC|T:0.000502:75:GnomAD_genomes|T:0.001369:4:KOREAN|T:0.001638:3:Korea1K|T:0.002626:19:Korea4K|T:0.022726:1760:TOMMO|T:0.000419:111:TOPMED|T:0.000539:2:TWINSUK|T:0.000277:4:ALFA
21	31668184	G>A	snv	140779554		by-frequency;by-alfa;by-cluster	intron_variant	SOD1	A:0.0002:1:1000Genomes|A:0.000156:1:1000Genomes_30X|A:0.000067:10:GnomAD_genomes|A:0.001027:3:KOREAN|A:0.005668:41:Korea4K|A:0.010788:835:TOMMO|A:0.000019:5:TOPMED|A:0.:0:ALFA
21	31664163	G>T	snv	141101938		by-frequency;by-alfa;by-cluster	intron_variant;2KB_upstream_variant;upstream_transcript_variant	SOD1;LOC124900469	T:0.005591:28:1000Genomes|T:0.005934:38:1000Genomes_30X|T:0.000742:166:GnomAD_exomes|T:0.005052:753:GnomAD_genomes|T:0.001002:1:GoNL|G:0.5:1:SGDP_PRJ|T:0.0062:1641:TOPMED|T:0.004577:66:ALFA
21	31665829	T>C	snv	141149696		by-frequency;by-alfa;by-cluster	intron_variant	SOD1	C:0.0002:1:1000Genomes|C:0.000156:1:1000Genomes_30X|C:0.000033:5:GnomAD_genomes|C:0.000271:21:TOMMO|C:0.000015:4:TOPMED|C:0.:0:ALFA
21	31664248	C>G	snv	141793144		by-frequency;by-cluster	intron_variant;2KB_upstream_variant;upstream_transcript_variant	SOD1;LOC124900469	G:0.0002:1:1000Genomes|G:0.000312:2:1000Genomes_30X|G:0.000007:1:GnomAD_genomes
21	31667513	T>C	snv	141828406		by-frequency;by-alfa;by-cluster	intron_variant	SOD1	C:0.000399:2:1000Genomes|C:0.000781:5:1000Genomes_30X|C:0.000107:61:GnomAD_exomes|C:0.000027:4:GnomAD_genomes|C:0.002738:8:KOREAN|C:0.003275:6:Korea1K|C:0.002765:20:Korea4K|C:0.001614:125:TOMMO|C:0.000015:4:TOPMED|C:0.:0:ALFA
21	31658283	C>G,T	snv	142178777		by-frequency;by-alfa;by-cluster	2KB_upstream_variant;upstream_transcript_variant	SOD1	T:0.000799:4:1000Genomes|T:0.000625:4:1000Genomes_30X|T:0.000388:58:GnomAD_genomes|T:0.000491:130:TOPMED|T:0.000142:2:ALFA
21	31666893	G>A	snv	142267813		by-frequency;by-alfa;by-cluster	intron_variant	SOD1	A:0.000998:5:1000Genomes|A:0.001093:7:1000Genomes_30X|A:0.003633:14:ALSPAC|A:0.000223:1:Estonian|A:0.001971:446:GnomAD_exomes|A:0.00175:261:GnomAD_genomes|A:0.004008:4:GoNL|A:0.001667:1:NorthernSweden|A:0.001874:496:TOPMED|A:0.001618:6:TWINSUK|A:0.001747:33:ALFA
21	31666253	T>A	snv	142589033		by-frequency;by-alfa;by-cluster	intron_variant	SOD1	A:0.0002:1:1000Genomes|A:0.000156:1:1000Genomes_30X|A:0.000013:2:GnomAD_genomes|A:0.000011:3:TOPMED|A:0.:0:ALFA
21	31663119	CTTTTT>-,CTTTTTCTTTTT	delins	144444539		by-frequency;by-alfa;by-cluster	intron_variant;2KB_upstream_variant;upstream_transcript_variant	SOD1;LOC124900469	-:0.227436:1139:1000Genomes|-:0.219863:1408:1000Genomes_30X|-:0.060976:235:ALSPAC|-:0.125:5:GENOME_DK|-:0.115231:16944:GnomAD_genomes|-:0.064128:64:GoNL|-:0.472162:865:Korea1K|-:0.441632:3193:Korea4K|CTTTTT:0.484453:37518:TOMMO|-:0.06014:223:TWINSUK|CTTTTTCTTTTT:0.086325:1409:ALFA
21	31661560	C>G	snv	144550785		by-frequency;by-alfa;by-cluster	intron_variant	SOD1	G:0.000156:1:1000Genomes_30X|G:0.000007:1:GnomAD_genomes|G:0.001027:3:KOREAN|G:0.003275:6:Korea1K|G:0.002627:19:Korea4K|G:0.000994:77:TOMMO|G:0.:0:ALFA
21	31669348	C>T	snv	145220169		by-frequency;by-cluster	500B_downstream_variant;downstream_transcript_variant	SOD1	T:0.0002:1:1000Genomes|T:0.000156:1:1000Genomes_30X|T:0.000007:1:GnomAD_genomes
21	31659177	T>C,G	snv	145421025		by-frequency;by-alfa;by-cluster	2KB_upstream_variant;upstream_transcript_variant	SOD1	C:0.000998:5:1000Genomes|C:0.000937:6:1000Genomes_30X|C:0.00138:206:GnomAD_genomes|T:0.25:1:SGDP_PRJ|C:0.001519:402:TOPMED|G:0.:0:ALFA
21	31666262	C>A,G,T	snv	145990495		by-frequency;by-alfa;by-cluster	intron_variant	SOD1	G:0.0002:1:1000Genomes|G:0.000156:1:1000Genomes_30X|A:0.000004:1:TOPMED|G:0.:0:ALFA
21	31658626	G>A	snv	146815416		by-frequency;by-alfa;by-cluster	2KB_upstream_variant;upstream_transcript_variant	SOD1	A:0.000399:2:1000Genomes|A:0.000312:2:1000Genomes_30X|A:0.00004:6:GnomAD_genomes|A:0.000342:1:KOREAN|A:0.000546:1:Korea1K|A:0.001106:8:Korea4K|A:0.003344:259:TOMMO|A:0.000011:3:TOPMED|A:0.:0:ALFA
21	31661932	A>C,G	snv	146827826		by-frequency;by-alfa;by-cluster	intron_variant	SOD1	C:0.000399:2:1000Genomes|C:0.000312:2:1000Genomes_30X|G:0.000008:2:TOPMED|G:0.:0:ALFA
21	31668162	G>C,T	snv	147709416		by-frequency;by-alfa;by-cluster	intron_variant	SOD1	T:0.001198:6:1000Genomes|T:0.001249:8:1000Genomes_30X|T:0.00059:88:GnomAD_genomes|T:0.00463:1:Qatari|C:0.000026:2:TOMMO|T:0.000631:167:TOPMED|T:0.000783:11:ALFA
21	31664216	A>G	snv	147956006		by-frequency;by-alfa;by-cluster	intron_variant;2KB_upstream_variant;upstream_transcript_variant	SOD1;LOC124900469	G:0.:0:ALSPAC|G:0.000039:7:GnomAD_exomes|G:0.00006:9:GnomAD_genomes|G:0.000013:1:TOMMO|G:0.000049:13:TOPMED|G:0.000539:2:TWINSUK|G:0.000071:1:ALFA
21	31669334	C>T	snv	148834007		by-frequency;by-alfa;by-cluster	500B_downstream_variant;downstream_transcript_variant	SOD1	T:0.001198:6:1000Genomes|T:0.000937:6:1000Genomes_30X|T:0.000154:23:GnomAD_genomes|T:0.005133:15:KOREAN|T:0.004011:29:Korea4K|T:0.001422:110:TOMMO|T:0.000219:58:TOPMED|T:0.004673:1:Vietnamese|T:0.:0:ALFA
21	31659967	C>-	delins	149235824		by-frequency;by-alfa;by-cluster	intron_variant	SOD1	-:0.001198:6:1000Genomes|-:0.001093:7:1000Genomes_30X|-:0.000056:37:GnomAD_exomes|-:0.000141:21:GnomAD_genomes|-:0.000419:3:Korea4K|-:0.000098:26:TOPMED|-:0.00463:1:Vietnamese|CC:0.:0:ALFA
21	31664180	C>G,T	snv	149838880		by-frequency;by-alfa;by-cluster	intron_variant;2KB_upstream_variant;upstream_transcript_variant	SOD1;LOC124900469	T:0.005591:28:1000Genomes|T:0.005934:38:1000Genomes_30X|T:0.000737:156:GnomAD_exomes|T:0.001002:1:GoNL|C:0.5:1:SGDP_PRJ|T:0.00007:1:ALFA
21	31669039	A>T	snv	150127159		by-frequency;by-alfa;by-cluster	500B_downstream_variant;downstream_transcript_variant	SOD1	T:0.001597:8:1000Genomes|T:0.001405:9:1000Genomes_30X|T:0.000071:1:GnomAD_exomes|T:0.001513:226:GnomAD_genomes|T:0.001806:478:TOPMED|T:0.001803:26:ALFA
21	31659049	G>A	snv	150397943		by-frequency;by-alfa;by-cluster	2KB_upstream_variant;upstream_transcript_variant	SOD1	A:0.001597:8:1000Genomes|A:0.001405:9:1000Genomes_30X|A:0.001514:226:GnomAD_genomes|A:0.000013:1:TOMMO|A:0.00181:479:TOPMED|A:0.001803:26:ALFA
21	31660304	C>A,T	snv	180757939		by-frequency;by-alfa;by-cluster	intron_variant	SOD1	T:0.000998:5:1000Genomes|T:0.001249:8:1000Genomes_30X|T:0.000455:68:GnomAD_genomes|T:0.009911:29:KOREAN|T:0.010368:75:Korea4K|C:0.5:1:SGDP_PRJ|T:0.008354:647:TOMMO|T:0.00463:1:Vietnamese|T:0.:0:ALFA
21	31661337	T>A	snv	181284782		by-frequency;by-alfa;by-cluster	intron_variant	SOD1	A:0.000156:1:1000Genomes_30X|A:0.00002:3:GnomAD_genomes|A:0.000049:13:TOPMED|A:0.:0:ALFA
21	31669426	T>A	snv	181318671		by-frequency;by-alfa;by-cluster	500B_downstream_variant;downstream_transcript_variant	SOD1	A:0.000799:4:1000Genomes|A:0.000625:4:1000Genomes_30X|A:0.000817:122:GnomAD_genomes|A:0.001152:305:TOPMED|A:0.000783:11:ALFA
21	31665320	T>G	snv	181705488		by-frequency;by-alfa;by-cluster	intron_variant	SOD1	G:0.0002:1:1000Genomes|G:0.000156:1:1000Genomes_30X|G:0.000067:10:GnomAD_genomes|G:0.000684:2:KOREAN|G:0.003821:7:Korea1K|G:0.001659:12:Korea4K|T:0.5:1:SGDP_PRJ|G:0.000232:18:TOMMO|G:0.000042:11:TOPMED|G:0.000071:1:ALFA
21	31665752	A>G	snv	181894348		by-frequency;by-alfa;by-cluster	intron_variant	SOD1	G:0.002796:14:1000Genomes|G:0.003123:20:1000Genomes_30X|G:0.002686:401:GnomAD_genomes|G:0.00463:1:Qatari|A:0.5:3:SGDP_PRJ|G:0.003075:814:TOPMED|G:0.002011:29:ALFA
21	31662418	A>C,G	snv	182103343		by-frequency;by-alfa;by-cluster	upstream_transcript_variant;intron_variant;2KB_upstream_variant	SOD1;LOC124900469	C:0.000156:1:1000Genomes_30X|C:0.000013:2:GnomAD_genomes|C:0.002053:6:KOREAN|C:0.000004:1:TOPMED|C:0.:0:ALFA
21	31658441	C>T	snv	182299066		by-frequency;by-alfa;by-cluster	upstream_transcript_variant;2KB_upstream_variant	SOD1	T:0.000399:2:1000Genomes|T:0.000312:2:1000Genomes_30X|T:0.00004:6:GnomAD_genomes|T:0.000415:3:Korea4K|T:0.000452:35:TOMMO|T:0.000038:10:TOPMED|T:0.:0:ALFA
21	31662794	C>G,T	snv	182487491		by-frequency;by-alfa;by-cluster	upstream_transcript_variant;intron_variant;2KB_upstream_variant	SOD1;LOC124900469	T:0.000799:4:1000Genomes|T:0.000625:4:1000Genomes_30X|T:0.000141:21:GnomAD_genomes|T:0.011294:33:KOREAN|T:0.008571:62:Korea4K|T:0.007541:584:TOMMO|T:0.:0:ALFA
21	31666268	C>T	snv	182669044		by-frequency;by-alfa;by-cluster	intron_variant	SOD1	T:0.0002:1:1000Genomes|T:0.000156:1:1000Genomes_30X|T:0.000013:2:GnomAD_genomes|T:0.000011:3:TOPMED|T:0.:0:ALFA
21	31662072	C>G,T	snv	183577942		by-frequency;by-alfa;by-cluster	intron_variant	SOD1	G:0.0002:1:1000Genomes|G:0.000156:1:1000Genomes_30X|G:0.000007:1:GnomAD_genomes|T:0.000013:1:TOMMO|G:0.000004:1:TOPMED|G:0.:0:ALFA
21	31664637	G>C	snv	183603801		by-frequency;by-alfa;by-cluster	intron_variant;500B_downstream_variant;downstream_transcript_variant	SOD1;LOC124900469	C:0.000599:3:1000Genomes|C:0.000937:6:1000Genomes_30X|C:0.000114:17:GnomAD_genomes|C:0.000138:1:Korea4K|C:0.000052:4:TOMMO|C:0.000072:19:TOPMED|C:0.000071:1:ALFA
21	31658290	T>C	snv	184044308		by-frequency;by-alfa;by-cluster	upstream_transcript_variant;2KB_upstream_variant	SOD1	C:0.0002:1:1000Genomes|C:0.000156:1:1000Genomes_30X|C:0.00002:3:GnomAD_genomes|C:0.000011:3:TOPMED|C:0.:0:ALFA
21	31658878	C>T	snv	184206283		by-frequency;by-cluster	upstream_transcript_variant;2KB_upstream_variant	SOD1	T:0.0002:1:1000Genomes|T:0.000312:2:1000Genomes_30X|T:0.000007:1:GnomAD_genomes
21	31668950	T>A	snv	184438684		by-frequency;by-alfa;by-cluster	500B_downstream_variant;downstream_transcript_variant	SOD1	A:0.000799:4:1000Genomes|A:0.000937:6:1000Genomes_30X|A:0.000778:3:ALSPAC|A:0.000599:49:GnomAD_exomes|A:0.000683:102:GnomAD_genomes|A:0.001002:1:GoNL|A:0.00085:225:TOPMED|A:0.000539:2:TWINSUK|A:0.000555:8:ALFA
21	31663417	A>G	snv	185246457		by-frequency;by-alfa;by-cluster	upstream_transcript_variant;intron_variant;2KB_upstream_variant	SOD1;LOC124900469	G:0.0002:1:1000Genomes|G:0.000156:1:1000Genomes_30X|G:0.000519:2:ALSPAC|G:0.00004:6:GnomAD_genomes|G:0.:0:TWINSUK|G:0.000071:1:ALFA
21	31660713	G>A	snv	185373794		by-frequency;by-alfa;by-cluster	intron_variant	SOD1	A:0.001597:8:1000Genomes|A:0.001718:11:1000Genomes_30X|A:0.001366:204:GnomAD_genomes|A:0.001538:407:TOPMED|A:0.000763:11:ALFA
21	31665875	A>G	snv	186419043		by-frequency;by-alfa;by-cluster	intron_variant	SOD1	G:0.000799:4:1000Genomes|G:0.000937:6:1000Genomes_30X|G:0.001557:6:ALSPAC|G:0.001339:6:Estonian|G:0.025:1:GENOME_DK|G:0.0013:194:GnomAD_genomes|G:0.001133:300:TOPMED|G:0.003236:12:TWINSUK|G:0.001323:25:ALFA
21	31664776	G>A,T	snv	186448511		by-frequency;by-alfa;by-cluster	intron_variant;500B_downstream_variant;downstream_transcript_variant	SOD1;LOC124900469	A:0.000399:2:1000Genomes|A:0.000468:3:1000Genomes_30X|A:0.000047:7:GnomAD_genomes|A:0.000026:2:TOMMO|T:0.:0:ALFA
21	31661862	A>C	snv	186530743		by-frequency;by-alfa;by-cluster	intron_variant	SOD1	C:0.0002:1:1000Genomes|C:0.000312:2:1000Genomes_30X|C:0.000027:4:GnomAD_genomes|C:0.000053:14:TOPMED|C:0.000071:1:ALFA
21	31662436	G>A	snv	186694820		by-frequency;by-alfa;by-cluster	upstream_transcript_variant;intron_variant;2KB_upstream_variant	SOD1;LOC124900469	A:0.0002:1:1000Genomes|A:0.000312:2:1000Genomes_30X|A:0.000033:5:GnomAD_genomes|A:0.:0:ALFA
21	31665473	G>A	snv	186840943		by-frequency;by-alfa;by-cluster	intron_variant	SOD1	A:0.000399:2:1000Genomes|A:0.000312:2:1000Genomes_30X|A:0.000275:41:GnomAD_genomes|A:0.000238:63:TOPMED|A:0.000069:1:ALFA
21	31658468	G>A	snv	186913570		by-frequency;by-alfa;by-cluster	upstream_transcript_variant;2KB_upstream_variant	SOD1	A:0.0002:1:1000Genomes|A:0.000312:2:1000Genomes_30X|A:0.000007:1:GnomAD_genomes|A:0.:0:ALFA
21	31662135	C>T	snv	187282815		by-frequency;by-cluster	intron_variant	SOD1	T:0.0002:1:1000Genomes|T:0.000156:1:1000Genomes_30X|T:0.000007:1:GnomAD_genomes
21	31662872	G>A,T	snv	188110394		by-frequency;by-alfa;by-cluster	upstream_transcript_variant;intron_variant;2KB_upstream_variant	SOD1;LOC124900469	A:0.000156:1:1000Genomes_30X|A:0.000034:5:GnomAD_genomes|A:0.001369:4:KOREAN|A:0.000546:1:Korea1K|A:0.001106:8:Korea4K|A:0.000362:28:TOMMO|A:0.000034:9:TOPMED|A:0.:0:ALFA
21	31666725	C>A,T	snv	188140371		by-frequency;by-alfa;by-cluster	intron_variant	SOD1	T:0.0002:1:1000Genomes|T:0.000312:2:1000Genomes_30X|T:0.000027:4:GnomAD_genomes|T:0.000026:7:TOPMED|T:0.:0:ALFA
21	31668044	C>A,G,T	snv	188383876		by-frequency;by-alfa;by-cluster	intron_variant	SOD1	T:0.000156:1:1000Genomes_30X|G:0.000038:10:TOPMED|G:0.:0:ALFA
21	31661086	A>G	snv	188511204		by-frequency;by-alfa;by-cluster	intron_variant	SOD1	G:0.000312:2:1000Genomes_30X|G:0.000778:3:ALSPAC|G:0.000141:21:GnomAD_genomes|G:0.000193:51:TOPMED|G:0.000539:2:TWINSUK|G:0.000208:3:ALFA
21	31658417	A>C,G	snv	188939095		by-frequency;by-alfa;by-cluster	upstream_transcript_variant;2KB_upstream_variant	SOD1	C:0.0014:7:1000Genomes|C:0.00125:8:1000Genomes_30X|C:0.00028:4:ALFA
21	31666089	A>T	snv	189646251		by-frequency;by-alfa;by-cluster	intron_variant	SOD1	T:0.002396:12:1000Genomes|T:0.002811:18:1000Genomes_30X|T:0.018682:72:ALSPAC|T:0.014286:64:Estonian|T:0.05:2:GENOME_DK|T:0.010121:1499:GnomAD_genomes|T:0.01503:15:GoNL|T:0.01:6:NorthernSweden|A:0.5:2:Siberian|T:0.008289:2194:TOPMED|T:0.018069:67:TWINSUK|T:0.011593:219:ALFA
21	31665168	A>T	snv	189705998		by-frequency;by-alfa;by-cluster	intron_variant	SOD1	T:0.000998:5:1000Genomes|T:0.001405:9:1000Genomes_30X|T:0.000446:2:Estonian|T:0.000751:112:GnomAD_genomes|T:0.003422:10:KOREAN|T:0.004367:8:Korea1K|T:0.003318:24:Korea4K|A:0.5:2:SGDP_PRJ|T:0.001175:91:TOMMO|T:0.001164:308:TOPMED|T:0.000318:6:ALFA
21	31669247	A>C	snv	189717049		by-frequency;by-alfa;by-cluster	500B_downstream_variant;downstream_transcript_variant	SOD1	C:0.000156:1:1000Genomes_30X|C:0.000013:2:GnomAD_genomes|C:0.000342:1:KOREAN|A:0.5:1:SGDP_PRJ|C:0.000004:1:TOPMED|C:0.004717:1:Vietnamese|C:0.:0:ALFA
21	31659029	C>G,T	snv	190218615		by-frequency;by-alfa;by-cluster	upstream_transcript_variant;2KB_upstream_variant	SOD1	T:0.0002:1:1000Genomes|T:0.000312:2:1000Genomes_30X|T:0.00002:3:GnomAD_genomes|T:0.:0:ALFA
21	31663427	T>G	snv	190497229		by-frequency;by-cluster	upstream_transcript_variant;intron_variant;2KB_upstream_variant	SOD1;LOC124900469	G:0.0002:1:1000Genomes|G:0.000156:1:1000Genomes_30X|G:0.000007:1:GnomAD_genomes
21	31665563	T>C	snv	190740308		by-frequency;by-alfa;by-cluster	intron_variant	SOD1	C:0.0002:1:1000Genomes|C:0.000312:2:1000Genomes_30X|C:0.000033:5:GnomAD_genomes|C:0.000053:14:TOPMED|C:0.:0:ALFA
21	31662344	A>G	snv	190987945		by-frequency;by-alfa;by-cluster	upstream_transcript_variant;intron_variant;2KB_upstream_variant	SOD1;LOC124900469	G:0.001198:6:1000Genomes|G:0.000937:6:1000Genomes_30X|G:0.000576:86:GnomAD_genomes|G:0.000582:154:TOPMED|G:0.000347:5:ALFA
21	31667094	A>G,T	snv	191243135		by-frequency;by-alfa;by-cluster	intron_variant	SOD1	G:0.0008:4:1000Genomes|G:0.00062:4:1000Genomes_30X|G:0.00274:8:KOREAN|G:0.0018:13:Korea4K|G:0.00023:18:TOMMO|G:0.00467:1:Vietnamese|T:0.:0:ALFA
21	31662694	T>C	snv	191500857		by-frequency;by-alfa;by-cluster	upstream_transcript_variant;intron_variant;2KB_upstream_variant	SOD1;LOC124900469	C:0.0002:1:1000Genomes|C:0.000312:2:1000Genomes_30X|C:0.000259:1:ALSPAC|C:0.000013:2:GnomAD_genomes|C:0.000023:6:TOPMED|C:0.:0:TWINSUK|C:0.:0:ALFA
21	31658539	C>T	snv	191752505		by-frequency;by-alfa;by-cluster	upstream_transcript_variant;2KB_upstream_variant	SOD1	T:0.000799:4:1000Genomes|T:0.000781:5:1000Genomes_30X|T:0.000663:99:GnomAD_genomes|T:0.00463:1:Qatari|C:0.5:1:SGDP_PRJ|T:0.000676:179:TOPMED|T:0.000427:6:ALFA
21	31657982	C>T	snv	191803596		by-frequency;by-alfa;by-cluster	upstream_transcript_variant;2KB_upstream_variant	SOD1	T:0.000399:2:1000Genomes|T:0.000312:2:1000Genomes_30X|T:0.000034:5:GnomAD_genomes|T:0.000026:7:TOPMED|T:0.:0:ALFA
21	31662057	A>G	snv	191807129		by-frequency;by-alfa;by-cluster	intron_variant	SOD1	G:0.000799:4:1000Genomes|G:0.000781:5:1000Genomes_30X|G:0.000663:99:GnomAD_genomes|G:0.000546:1:Korea1K|G:0.00463:1:Qatari|A:0.5:1:SGDP_PRJ|G:0.000013:1:TOMMO|G:0.000695:184:TOPMED|G:0.000427:6:ALFA
21	31668052	T>C	snv	192333564		by-frequency;by-alfa;by-cluster	intron_variant	SOD1	C:0.000312:2:1000Genomes_30X|C:0.000074:11:GnomAD_genomes|C:0.000038:10:TOPMED|C:0.000071:1:ALFA
21	31664128	C>T	snv	192548935		by-frequency;by-alfa;by-cluster	upstream_transcript_variant;intron_variant;2KB_upstream_variant	SOD1;LOC124900469	T:0.001398:7:1000Genomes|T:0.001405:9:1000Genomes_30X|T:0.000519:2:ALSPAC|T:0.000684:102:GnomAD_genomes|T:0.:0:KOREAN|T:0.009259:2:Qatari|T:0.001103:292:TOPMED|T:0.:0:TWINSUK|T:0.000347:5:ALFA
21	31658430	G>A	snv	192667447		by-frequency;by-alfa;by-cluster	upstream_transcript_variant;2KB_upstream_variant	SOD1	A:0.000799:4:1000Genomes|A:0.000781:5:1000Genomes_30X|A:0.000241:36:GnomAD_genomes|G:0.5:1:SGDP_PRJ|A:0.000223:59:TOPMED|A:0.000071:1:ALFA
21	31659162	C>A	snv	192979833		by-frequency;by-alfa;by-cluster	upstream_transcript_variant;2KB_upstream_variant	SOD1	A:0.0002:1:1000Genomes|A:0.009598:43:Estonian|A:0.001086:162:GnomAD_genomes|C:0.:0:SGDP_PRJ|A:0.000091:24:TOPMED|A:0.002277:43:ALFA
21	31663068	G>C	snv	193060339		by-frequency;by-alfa;by-cluster	upstream_transcript_variant;intron_variant;2KB_upstream_variant	SOD1;LOC124900469	C:0.000799:4:1000Genomes|C:0.001874:12:1000Genomes_30X|C:0.000299:44:GnomAD_genomes|C:0.001711:5:KOREAN|C:0.001638:3:Korea1K|C:0.003179:23:Korea4K|G:0.5:5:SGDP_PRJ|C:0.001033:80:TOMMO|C:0.000276:73:TOPMED|C:0.000069:1:ALFA
21	31657873	T>G	snv	199792737		by-frequency;by-alfa;by-cluster	upstream_transcript_variant;2KB_upstream_variant	SOD1	G:0.00103:3:KOREAN|G:0.00164:3:Korea1K|G:0.00097:7:Korea4K|G:0.:0:ALFA
21	31659816	A>G	snv	200016533		by-frequency;by-alfa;by-cluster	coding_sequence_variant;missense_variant	SOD1	G:0.000015:21:GnomAD_exomes|G:0.0000067:1:GnomAD_genomes|G:0.0000076:2:TOPMED|G:0.000033:1:ALFA
21	31663834	G>C,T	snv	200072460		by-frequency;by-alfa;by-cluster	coding_sequence_variant;synonymous_variant;2KB_upstream_variant;upstream_transcript_variant	SOD1;LOC124900469	T:0.0000014:2:GnomAD_exomes|C:0.0000067:1:GnomAD_genomes|C:0.0000038:1:TOPMED|C:0.:0:ALFA
21	31668623	T>C	snv	200321360		by-frequency;by-cluster	3_prime_UTR_variant	SOD1	C:0.0000018:2:GnomAD_exomes|C:0.0000517:4:TOMMO
21	31659725	C>A,G,T	snv	200447364		by-frequency;by-alfa;by-cluster	5_prime_UTR_variant	SOD1	G:0.0002:1:1000Genomes|G:0.00016:1:1000Genomes_30X|T:0.00187:1:MGP|T:0.00001:1:TOMMO|G:0.:0:ALFA
21	31659820	C>A,T	snv	200454724		by-frequency;by-alfa;by-cluster	coding_sequence_variant;synonymous_variant	SOD1	A:0.0000136:19:GnomAD_exomes|A:0.0000067:1:GnomAD_genomes|T:0.:0:ALFA
21	31663125	C>G,T	snv	200518251		by-frequency;by-alfa;by-cluster	upstream_transcript_variant;intron_variant;2KB_upstream_variant	SOD1;LOC124900469	T:0.0787:17:Qatari|C:0.5:45:SGDP_PRJ|C:0.5:1:Siberian|G:0.00182:141:TOMMO|T:0.0311:803:ALFA
21	31657691	A>-	delins	200735628		by-frequency;by-alfa;by-cluster		SOD1	-:0.003794:19:1000Genomes|-:0.003592:23:1000Genomes_30X|-:0.015179:68:Estonian|-:0.007798:1163:GnomAD_genomes|-:0.017034:17:GoNL|-:0.001092:2:Korea1K|-:0.001106:8:Korea4K|-:0.003333:2:NorthernSweden|-:0.000181:14:TOMMO|-:0.005777:1529:TOPMED|AA:0.008153:151:ALFA
21	31668014	T>A,C	snv	200938419		by-frequency;by-alfa;by-cluster	intron_variant	SOD1	T:0.40541:30:SGDP_PRJ|C:0.:0:ALFA
21	31668987	->AACA	delins	201182313		by-frequency;by-alfa;by-cluster	500B_downstream_variant;downstream_transcript_variant	SOD1	AACA:0.005791:29:1000Genomes|AACA:0.000687:28:GnomAD_exomes|AACA:0.005057:755:GnomAD_genomes|AACA:0.001002:1:GoNL|AACA:0.006219:1646:TOPMED|AACAAACA:0.004698:66:ALFA
21	31667462	A>G,T	snv	201524601		by-frequency;by-alfa;by-cluster	intron_variant	SOD1	G:0.000002:1:GnomAD_exomes|A:0.416667:10:SGDP_PRJ|G:0.000039:3:TOMMO|T:0.:0:ALFA
21	31663765	C>G,T	snv	201746008		by-frequency;by-alfa;by-cluster	upstream_transcript_variant;intron_variant;2KB_upstream_variant	SOD1;LOC124900469	G:0.0002:1:1000Genomes|G:0.000156:1:1000Genomes_30X|G:0.000007:1:GnomAD_genomes|T:0.:0:ALFA
21	31668459	A>G	snv	202007987		by-frequency;by-alfa;by-cluster	intron_variant	SOD1	G:0.0002:1:1000Genomes|G:0.000156:1:1000Genomes_30X|G:0.000007:1:GnomAD_genomes|G:0.:0:ALFA
21	31658036	->AC	ins	202045389		by-cluster	upstream_transcript_variant;2KB_upstream_variant	SOD1
21	31667302	T>C	snv	202198235		by-frequency;by-alfa;by-cluster	coding_sequence_variant;missense_variant	SOD1	C:0.000009:7:GnomAD_exomes|C:0.:0:ALFA
21	31660511	C>A	snv	367879829			intron_variant	SOD1
21	31666205	C>A	snv	368166527		by-frequency;by-alfa;by-cluster	intron_variant	SOD1	A:0.000013:2:GnomAD_genomes|A:0.000546:1:Korea1K|A:0.000057:15:TOPMED|A:0.000071:1:ALFA
21	31665860	G>C	snv	368426485			intron_variant	SOD1
21	31660316	G>T	snv	368635492		by-frequency;by-alfa;by-cluster	intron_variant	SOD1	T:0.000008:2:TOPMED|T:0.:0:ALFA
21	31668280	C>A	snv	369202989			intron_variant	SOD1
21	31664006	C>G	snv	369360821		by-frequency;by-alfa;by-cluster	upstream_transcript_variant;intron_variant;2KB_upstream_variant	SOD1;LOC124900469	G:0.000035:20:GnomAD_exomes|G:0.000013:2:GnomAD_genomes|G:0.001027:3:KOREAN|G:0.000276:2:Korea4K|G:0.000504:39:TOMMO|G:0.000034:9:TOPMED|G:0.:0:ALFA
21	31667342	A>G	snv	369415073		by-frequency;by-alfa;by-cluster	coding_sequence_variant;synonymous_variant	SOD1	G:0.000008:1:ExAC|G:0.000001:1:GnomAD_exomes|G:0.000007:1:GnomAD_genomes|G:0.000077:1:GoESP|G:0.000015:4:TOPMED|G:0.:0:ALFA
21	31665358	ATTAA>-	delins	369471108		by-frequency;by-alfa;by-cluster	intron_variant	SOD1	-:0.002811:18:1000Genomes_30X|-:0.003981:594:GnomAD_genomes|-:0.000039:3:TOMMO|-:0.00487:1289:TOPMED|TTAA:0.004199:59:ALFA
21	31667901	T>C	snv	369471543		by-frequency;by-alfa	intron_variant	SOD1	C:0.:0:ALFA
21	31659758	G>A,T	snv	369622986		by-frequency;by-alfa;by-cluster	5_prime_UTR_variant	SOD1	T:0.0002:1:1000Genomes|T:0.000156:1:1000Genomes_30X|T:0.000033:4:ExAC|T:0.000054:8:GnomAD_genomes|T:0.000154:2:GoESP|T:0.000125:33:TOPMED|T:0.:0:ALFA
21	31657913	T>A,C	snv	369734071		by-frequency;by-alfa;by-cluster	upstream_transcript_variant;2KB_upstream_variant	SOD1	C:0.00579:29:1000Genomes|C:0.00547:35:1000Genomes_30X|C:0.00026:1:ALSPAC|C:0.00027:1:TWINSUK|C:0.00007:1:ALFA
21	31662788	G>C	snv	369902907			upstream_transcript_variant;intron_variant;2KB_upstream_variant	SOD1;LOC124900469
21	31664424	G>-	delins	370112591		by-frequency;by-alfa;by-cluster	intron_variant;non_coding_transcript_variant	SOD1;LOC124900469	-:0.0001:4:GnomAD_exomes|-:0.000234:35:GnomAD_genomes|-:0.000242:64:TOPMED|GGG:0.000071:1:ALFA
21	31660186	G>A,T	snv	370122932		by-frequency;by-alfa;by-cluster	intron_variant	SOD1	T:0.00016:1:1000Genomes_30X|T:0.:0:ALFA
21	31659887	C>G,T	snv	370394828		by-frequency;by-alfa;by-cluster	intron_variant	SOD1	T:0.000011:3:TOPMED|T:0.:0:ALFA
21	31658542	T>A,C	snv	370526117		by-frequency;by-alfa;by-cluster	upstream_transcript_variant;2KB_upstream_variant	SOD1	A:0.000007:1:GnomAD_genomes|A:0.000004:1:TOPMED|A:0.:0:ALFA
21	31659892	C>A,G,T	snv	371102436		by-frequency;by-alfa;by-cluster	intron_variant	SOD1	G:0.0002:1:1000Genomes|A:0.000223:1:Estonian|G:0.000231:3:GoESP|T:0.000039:3:TOMMO|G:0.000321:85:TOPMED|G:0.000159:3:ALFA
21	31666341	T>C,G	snv	371317857		by-frequency;by-alfa;by-cluster	intron_variant	SOD1	C:0.:0:ALFA
21	31666542	A>G	snv	371379092		by-frequency;by-alfa;by-cluster	intron_variant	SOD1	G:0.0001997:1:1000Genomes|G:0.0001562:1:1000Genomes_30X|G:0.0002595:1:ALSPAC|G:0.0000758:8:ExAC|G:0.0001378:181:GnomAD_exomes|G:0.0000603:9:GnomAD_genomes|G:0.0002307:3:GoESP|G:0.0018727:1:MGP|G:0.0000907:24:TOPMED|G:0.0002697:1:TWINSUK|G:0.0001282:3:ALFA
21	31662161	C>T	snv	371434239		by-frequency;by-alfa;by-cluster	intron_variant	SOD1	T:0.00002:3:GnomAD_genomes|T:0.00003:8:TOPMED|T:0.:0:ALFA
21	31659527	C>A,G,T	snv	371864059		by-frequency;by-alfa;by-cluster	upstream_transcript_variant;2KB_upstream_variant	SOD1	C:0.5:1:SGDP_PRJ|T:0.00001:1:TOMMO|T:0.:0:ALFA
21	31667501	A>C,G	snv	372360012		by-frequency;by-alfa;by-cluster	intron_variant	SOD1	G:0.000017:10:GnomAD_exomes|G:0.00002:3:GnomAD_genomes|G:0.000039:3:TOMMO|G:0.000008:2:TOPMED|G:0.:0:ALFA
21	31660343	C>T	snv	372430056			intron_variant	SOD1
21	31667210	T>A,C	snv	372609861		by-frequency;by-alfa;by-cluster	intron_variant	SOD1	A:0.000259:1:ALSPAC|A:0.00066:74:ExAC|A:0.000538:7:GoESP|A:0.001002:1:GoNL|A:0.001667:1:NorthernSweden|A:0.000574:152:TOPMED|A:0.001348:5:TWINSUK|A:0.000069:1:ALFA
21	31658108	C>G	snv	373263746		by-frequency;by-alfa;by-cluster	upstream_transcript_variant;2KB_upstream_variant	SOD1	G:0.000399:2:1000Genomes|G:0.000312:2:1000Genomes_30X|G:0.000028:4:GnomAD_genomes|G:0.000138:1:Korea4K|G:0.000194:15:TOMMO|G:0.00003:8:TOPMED|G:0.004717:1:Vietnamese|G:0.:0:ALFA
21	31662839	C>G	snv	373507877		by-frequency;by-alfa;by-cluster	upstream_transcript_variant;intron_variant;2KB_upstream_variant	SOD1;LOC124900469	G:0.000007:1:GnomAD_genomes|G:0.000013:1:TOMMO|G:0.000008:2:TOPMED|G:0.:0:ALFA
21	31666047	C>T	snv	373972705		by-cluster	intron_variant	SOD1
21	31660429	A>C,T	snv	374288825		by-frequency;by-alfa;by-cluster	intron_variant	SOD1	C:0.000799:4:1000Genomes|C:0.000625:4:1000Genomes_30X|C:0.000147:22:GnomAD_genomes|C:0.000684:2:KOREAN|C:0.000277:2:Korea4K|T:0.000026:2:TOMMO|C:0.00006:16:TOPMED|C:0.:0:ALFA
21	31661366	C>G	snv	374684501		by-frequency;by-alfa;by-cluster	intron_variant	SOD1	G:0.006789:34:1000Genomes|G:0.006246:40:1000Genomes_30X|G:0.000259:1:ALSPAC|G:0.000885:132:GnomAD_genomes|G:0.000174:46:TOPMED|G:0.00027:1:TWINSUK|G:0.000277:4:ALFA
21	31666883	C>G,T	snv	374759511		by-frequency;by-alfa;by-cluster	intron_variant	SOD1	G:0.0014:7:1000Genomes|G:0.00141:9:1000Genomes_30X|G:0.:0:ALSPAC|G:0.00027:1:TWINSUK|T:0.:0:ALFA
21	31664699	A>T	snv	375013057			intron_variant;500B_downstream_variant;downstream_transcript_variant	SOD1;LOC124900469
21	31665437	T>A,G	snv	375052386		by-frequency;by-alfa;by-cluster	intron_variant	SOD1	A:0.000399:2:1000Genomes|A:0.000312:2:1000Genomes_30X|A:0.000042:11:TOPMED|A:0.004717:1:Vietnamese|G:0.:0:ALFA
21	31667422	G>A	snv	375225231		by-frequency;by-alfa;by-cluster	intron_variant	SOD1	A:0.0000165:2:ExAC|A:0.0000077:8:GnomAD_exomes|A:0.0000201:3:GnomAD_genomes|A:0.0000769:1:GoESP|A:0.0000416:11:TOPMED|A:0.0000434:1:ALFA
21	31666551	G>A	snv	375975158		by-frequency;by-alfa;by-cluster	intron_variant	SOD1	A:0.000019:2:ExAC|A:0.000007:1:GnomAD_genomes|A:0.000077:1:GoESP|A:0.000162:43:TOPMED|A:0.:0:ALFA
21	31659994	C>T	snv	376055638		by-frequency;by-alfa;by-cluster	intron_variant	SOD1	T:0.000021:10:GnomAD_exomes|T:0.00004:6:GnomAD_genomes|T:0.000013:1:TOMMO|T:0.000113:30:TOPMED|T:0.:0:ALFA
21	31664147	T>C	snv	376170953		by-frequency;by-alfa	upstream_transcript_variant;intron_variant;2KB_upstream_variant	SOD1;LOC124900469	C:0.:0:ALFA
21	31667569	C>G	snv	376791992		by-frequency;by-alfa;by-cluster	intron_variant	SOD1	G:0.000023:6:TOPMED|G:0.:0:ALFA
21	31669191	G>-	del	376837445		by-frequency;by-alfa	500B_downstream_variant;downstream_transcript_variant	SOD1	-:0.:0:ALFA
21	31663591	T>C	snv	376864244			upstream_transcript_variant;intron_variant;2KB_upstream_variant	SOD1;LOC124900469
21	31659886	G>A,C,T	snv	376950416		by-frequency;by-alfa;by-cluster	intron_variant	SOD1	C:0.000007:1:GnomAD_genomes|A:0.000077:1:GoESP|A:0.000011:3:TOPMED|A:0.000102:2:ALFA
21	31658170	C>A,T	snv	377097450		by-frequency;by-alfa;by-cluster	upstream_transcript_variant;2KB_upstream_variant	SOD1	A:0.000007:1:GnomAD_genomes|C:0.5:1:SGDP_PRJ|A:0.000019:5:TOPMED|A:0.:0:ALFA
21	31664294	A>G	snv	377594373			upstream_transcript_variant;intron_variant;2KB_upstream_variant	SOD1;LOC124900469
21	31659749	C>G,T	snv	377633271		by-frequency;by-alfa;by-cluster	5_prime_UTR_variant	SOD1	T:0.0002:1:1000Genomes|T:0.000156:1:1000Genomes_30X|T:0.000007:1:GnomAD_genomes|T:0.000077:1:GoESP|G:0.000004:1:TOPMED|G:0.:0:ALFA
21	31659734	C>T	snv	377672428		by-frequency;by-alfa;by-cluster	5_prime_UTR_variant	SOD1	T:0.0000084:1:ExAC|T:0.0000021:3:GnomAD_exomes|T:0.0000769:1:GoESP|T:0.0000076:2:TOPMED|T:0.:0:ALFA
21	31665971	TTTTTTT>-,TT,TTT,TTTT,TTTTT,TTTTTT,TTTTTTTT,TTTTTTTTT,TTTTTTTTTT,TTTTTTTTTTT	delins	397866461		by-frequency;by-alfa;by-cluster	intron_variant	SOD1	TTTTTTTTTTTTTT:0.:0:ALFA
21	31661573	A>G	snv	527414348		by-frequency;by-cluster	intron_variant	SOD1	G:0.0002:1:1000Genomes
21	31666837	ATT>-	del	527717238		by-frequency;by-alfa;by-cluster	intron_variant	SOD1	-:0.000998:5:1000Genomes|-:0.001557:6:ALSPAC|-:0.002679:12:Estonian|-:0.001125:279:GnomAD_exomes|-:0.00102:152:GnomAD_genomes|-:0.000026:2:TOMMO|-:0.000763:202:TOPMED|-:0.001079:4:TWINSUK|-:0.00135:25:ALFA
21	31660496	A>G,T	snv	527796894		by-frequency;by-alfa;by-cluster	intron_variant	SOD1	T:0.000047:7:GnomAD_genomes|T:0.000034:9:TOPMED|T:0.:0:ALFA
21	31667686	A>G	snv	527840942		by-frequency;by-alfa;by-cluster	intron_variant	SOD1	G:0.000399:2:1000Genomes|G:0.000312:2:1000Genomes_30X|G:0.000067:10:GnomAD_genomes|G:0.000342:1:KOREAN|G:0.000415:3:Korea4K|G:0.000038:10:TOPMED|G:0.:0:ALFA
21	31660762	C>T	snv	527845895		by-frequency;by-alfa;by-cluster	intron_variant	SOD1	T:0.000399:2:1000Genomes|T:0.000468:3:1000Genomes_30X|T:0.000127:19:GnomAD_genomes|T:0.000098:26:TOPMED|T:0.000142:2:ALFA
21	31667107	C>T	snv	527981077		by-frequency;by-alfa;by-cluster	intron_variant	SOD1	T:0.0002:1:1000Genomes|T:0.000156:1:1000Genomes_30X|T:0.000148:75:GnomAD_exomes|T:0.000154:23:GnomAD_genomes|T:0.000013:1:TOMMO|T:0.00011:29:TOPMED|T:0.000069:1:ALFA
21	31658562	T>G	snv	528537618		by-frequency;by-cluster	upstream_transcript_variant;2KB_upstream_variant	SOD1	G:0.0002:1:1000Genomes|G:0.000156:1:1000Genomes_30X|G:0.000007:1:GnomAD_genomes
21	31658099	C>G,T	snv	528576042		by-frequency;by-alfa;by-cluster	upstream_transcript_variant;2KB_upstream_variant	SOD1	G:0.0002:1:1000Genomes|G:0.000156:1:1000Genomes_30X|T:0.000026:7:TOPMED|T:0.:0:ALFA
21	31664303	T>C	snv	528604003		by-frequency;by-alfa;by-cluster	upstream_transcript_variant;intron_variant;2KB_upstream_variant	SOD1;LOC124900469	C:0.0002:1:1000Genomes|C:0.000156:1:1000Genomes_30X|C:0.000049:6:GnomAD_exomes|C:0.000241:36:GnomAD_genomes|C:0.000234:62:TOPMED|C:0.000071:1:ALFA
21	31659893	C>G,T	snv	528842654		by-frequency;by-alfa;by-cluster	intron_variant	SOD1	T:0.000399:2:1000Genomes|T:0.000156:1:1000Genomes_30X|T:0.000017:2:ExAC|T:0.000007:1:GnomAD_genomes|T:0.:0:ALFA
21	31658639	T>C	snv	529411731		by-frequency;by-alfa;by-cluster	upstream_transcript_variant;2KB_upstream_variant	SOD1	C:0.000799:4:1000Genomes|C:0.000781:5:1000Genomes_30X|C:0.000663:99:GnomAD_genomes|C:0.00463:1:Qatari|T:0.5:1:SGDP_PRJ|C:0.000676:179:TOPMED|C:0.000427:6:ALFA
21	31665026	A>T	snv	529800027		by-frequency;by-cluster	intron_variant	SOD1	T:0.0002:1:1000Genomes|T:0.000312:2:1000Genomes_30X|T:0.000007:1:GnomAD_genomes
21	31668976	T>C	snv	530212613		by-frequency;by-alfa;by-cluster	500B_downstream_variant;downstream_transcript_variant	SOD1	C:0.0002:1:1000Genomes|C:0.000312:2:1000Genomes_30X|C:0.000007:1:GnomAD_genomes|C:0.000004:1:TOPMED|C:0.:0:ALFA
21	31663637	G>A,T	snv	530445006		by-frequency;by-alfa;by-cluster	upstream_transcript_variant;intron_variant;2KB_upstream_variant	SOD1;LOC124900469	A:0.000399:2:1000Genomes|A:0.000625:4:1000Genomes_30X|A:0.001557:6:ALSPAC|A:0.000223:1:Estonian|A:0.00059:88:GnomAD_genomes|A:0.000544:144:TOPMED|A:0.000539:2:TWINSUK|A:0.000741:14:ALFA
21	31665600	T>A	snv	530693741		by-frequency;by-alfa;by-cluster	intron_variant	SOD1	A:0.0002:1:1000Genomes|A:0.000156:1:1000Genomes_30X|A:0.000141:21:GnomAD_genomes|A:0.000136:36:TOPMED|A:0.000214:3:ALFA
21	31665162	A>T	snv	530728999		by-frequency;by-alfa;by-cluster	intron_variant	SOD1	T:0.0002:1:1000Genomes|T:0.000013:2:GnomAD_genomes|T:0.:0:ALFA
21	31663712	C>A,G,T	snv	531001639		by-frequency;by-cluster	upstream_transcript_variant;intron_variant;2KB_upstream_variant	SOD1;LOC124900469	G:0.0002:1:1000Genomes|G:0.000156:1:1000Genomes_30X|G:0.000007:1:GnomAD_genomes|T:0.000342:1:KOREAN
21	31664368	T>A	snv	531004302		by-frequency	intron_variant;non_coding_transcript_variant	SOD1;LOC124900469	A:0.001:1:GoNL
21	31662993	C>A,T	snv	531040207		by-frequency;by-alfa;by-cluster	upstream_transcript_variant;intron_variant;2KB_upstream_variant	SOD1;LOC124900469	T:0.002796:14:1000Genomes|T:0.002498:16:1000Genomes_30X|T:0.000512:75:GnomAD_genomes|T:0.013699:40:KOREAN|T:0.012555:23:Korea1K|T:0.012027:87:Korea4K|C:0.5:1:SGDP_PRJ|T:0.016864:1306:TOMMO|T:0.:0:ALFA
21	31669140	T>A	snv	531483945		by-frequency;by-alfa;by-cluster	500B_downstream_variant;downstream_transcript_variant	SOD1	A:0.000399:2:1000Genomes|A:0.000468:3:1000Genomes_30X|A:0.000201:30:GnomAD_genomes|A:0.000227:60:TOPMED|A:0.000071:1:ALFA
21	31662126	C>G,T	snv	531752965		by-frequency;by-alfa;by-cluster	intron_variant	SOD1	T:0.000399:2:1000Genomes|T:0.000468:3:1000Genomes_30X|T:0.00006:9:GnomAD_genomes|T:0.:0:ALFA
21	31668406	G>A,C	snv	532358455		by-frequency;by-alfa;by-cluster	intron_variant	SOD1	C:0.0002:1:1000Genomes|C:0.000312:2:1000Genomes_30X|C:0.000026:21:GnomAD_exomes|C:0.000015:4:TOPMED|C:0.:0:ALFA
21	31666784	A>C,G	snv	532363426		by-frequency;by-alfa;by-cluster	intron_variant	SOD1	C:0.000007:1:GnomAD_genomes|C:0.001002:1:GoNL|C:0.001667:1:NorthernSweden|C:0.000004:1:TOPMED|C:0.:0:ALFA
21	31667762	A>C,T	snv	532630183		by-frequency;by-cluster	intron_variant	SOD1	C:0.0002:1:1000Genomes|C:0.000156:1:1000Genomes_30X|C:0.000007:1:GnomAD_genomes|T:0.000168:13:TOMMO
21	31662736	C>A,T	snv	532645836		by-frequency;by-alfa;by-cluster	upstream_transcript_variant;intron_variant;2KB_upstream_variant	SOD1;LOC124900469	A:0.0002:1:1000Genomes|A:0.000312:2:1000Genomes_30X|A:0.00004:6:GnomAD_genomes|T:0.:0:ALFA
21	31662257	A>G	snv	532681839		by-frequency;by-alfa;by-cluster	intron_variant	SOD1	G:0.0002:1:1000Genomes|G:0.000312:2:1000Genomes_30X|G:0.00002:3:GnomAD_genomes|G:0.000004:1:TOPMED|G:0.:0:ALFA
21	31667077	A>G	snv	532902565		by-frequency;by-alfa;by-cluster	intron_variant	SOD1	G:0.0002:1:1000Genomes|G:0.000312:2:1000Genomes_30X|G:0.000027:4:GnomAD_genomes|G:0.000057:15:TOPMED|G:0.000071:1:ALFA
21	31660739	A>T	snv	533038070		by-frequency;by-alfa;by-cluster	intron_variant	SOD1	T:0.0002:1:1000Genomes|T:0.000156:1:1000Genomes_30X|T:0.000027:4:GnomAD_genomes|T:0.000042:11:TOPMED|T:0.:0:ALFA
21	31662564	A>G,T	snv	533640561		by-frequency;by-alfa;by-cluster	2KB_upstream_variant;upstream_transcript_variant;intron_variant	SOD1;LOC124900469	G:0.0002:1:1000Genomes|G:0.000156:1:1000Genomes_30X|G:0.000042:11:TOPMED|G:0.000071:1:ALFA
21	31661713	G>C	snv	533689540		by-frequency;by-alfa;by-cluster	intron_variant	SOD1	C:0.0002:1:1000Genomes|C:0.000156:1:1000Genomes_30X|C:0.002335:9:ALSPAC|C:0.000878:131:GnomAD_genomes|C:0.004008:4:GoNL|G:0.5:1:SGDP_PRJ|C:0.001016:269:TOPMED|C:0.001888:7:TWINSUK|C:0.001456:21:ALFA
21	31660464	G>A	snv	533758426			intron_variant	SOD1
21	31666609	G>A	snv	533821670		by-frequency;by-alfa;by-cluster	intron_variant	SOD1	A:0.0002:1:1000Genomes|A:0.000156:1:1000Genomes_30X|A:0.000017:14:GnomAD_exomes|A:0.000007:1:GnomAD_genomes|A:0.000013:1:TOMMO|A:0.000004:1:TOPMED|A:0.:0:ALFA
21	31666716	C>T	snv	534256309		by-frequency;by-alfa;by-cluster	intron_variant	SOD1	T:0.0002:1:1000Genomes|T:0.000156:1:1000Genomes_30X|T:0.000009:4:GnomAD_exomes|T:0.000013:2:GnomAD_genomes|T:0.000004:1:TOPMED|T:0.:0:ALFA
21	31658420	A>G	snv	534408761		by-frequency;by-alfa;by-cluster	2KB_upstream_variant;upstream_transcript_variant	SOD1	G:0.001198:6:1000Genomes|G:0.001562:10:1000Genomes_30X|G:0.000449:67:GnomAD_genomes|G:0.013889:3:Qatari|A:0.5:2:SGDP_PRJ|G:0.000359:95:TOPMED|G:0.000277:4:ALFA
21	31662545	A>G	snv	534672809		by-frequency;by-alfa;by-cluster	2KB_upstream_variant;upstream_transcript_variant;intron_variant	SOD1;LOC124900469	G:0.0002:1:1000Genomes|G:0.000156:1:1000Genomes_30X|G:0.001557:6:ALSPAC|G:0.000563:84:GnomAD_genomes|G:0.004008:4:GoNL|G:0.001667:1:NorthernSweden|G:0.000521:138:TOPMED|G:0.000809:3:TWINSUK|G:0.000159:3:ALFA
21	31664739	C>A,G,T	snv	534749722		by-frequency;by-alfa;by-cluster	downstream_transcript_variant;intron_variant;500B_downstream_variant	SOD1;LOC124900469	A:0.0002:1:1000Genomes|A:0.000156:1:1000Genomes_30X|A:0.000007:1:GnomAD_genomes|G:0.000103:8:TOMMO|T:0.:0:ALFA
21	31669380	T>A	snv	534767447		by-frequency	downstream_transcript_variant;500B_downstream_variant	SOD1	A:0.001:1:GoNL
21	31667440	ATTG>-	delins	534860517		by-frequency;by-alfa;by-cluster	intron_variant	SOD1	-:0.000799:4:1000Genomes|-:0.000937:6:1000Genomes_30X|-:0.000778:3:ALSPAC|-:0.000893:4:Estonian|-:0.000861:850:GnomAD_exomes|-:0.000658:97:GnomAD_genomes|-:0.001002:1:GoNL|-:0.01:6:NorthernSweden|-:0.000103:8:TOMMO|-:0.00045:119:TOPMED|-:0.001079:4:TWINSUK|TTG:0.00054:10:ALFA
21	31663192	G>C,T	snv	535846352		by-frequency;by-alfa;by-cluster	2KB_upstream_variant;upstream_transcript_variant;intron_variant	SOD1;LOC124900469	C:0.000399:2:1000Genomes|C:0.000312:2:1000Genomes_30X|C:0.000014:2:GnomAD_genomes|G:0.5:1:SGDP_PRJ|T:0.:0:ALFA
21	31663897	T>A,C	snv	535923763		by-frequency;by-cluster	2KB_upstream_variant;upstream_transcript_variant;intron_variant	SOD1;LOC124900469	A:0.000008:1:ExAC|C:0.000013:1:TOMMO
21	31661829	G>A,C	snv	536381269		by-frequency;by-alfa;by-cluster	intron_variant	SOD1	C:0.0002:1:1000Genomes|C:0.000156:1:1000Genomes_30X|C:0.000167:25:GnomAD_genomes|C:0.:0:ALFA
21	31663970	C>G,T	snv	536586198		by-frequency;by-alfa;by-cluster	2KB_upstream_variant;upstream_transcript_variant;intron_variant	SOD1;LOC124900469	T:0.000399:2:1000Genomes|T:0.000312:2:1000Genomes_30X|T:0.000241:36:GnomAD_genomes|T:0.000242:64:TOPMED|T:0.004717:1:Vietnamese|T:0.000142:2:ALFA
21	31657775	T>A	snv	536602156		by-frequency;by-cluster	2KB_upstream_variant;upstream_transcript_variant	SOD1	A:0.0002:1:1000Genomes|A:0.000156:1:1000Genomes_30X|A:0.000007:1:GnomAD_genomes
21	31662304	A>G	snv	536747882		by-frequency;by-cluster	intron_variant	SOD1	G:0.0002:1:1000Genomes|G:0.000156:1:1000Genomes_30X|G:0.000007:1:GnomAD_genomes
21	31662248	G>A	snv	537681710		by-frequency;by-alfa;by-cluster	intron_variant	SOD1	A:0.001002:1:GoNL|A:0.000004:1:TOPMED|A:0.:0:ALFA
21	31666738	T>C	snv	537940144		by-frequency;by-alfa;by-cluster	intron_variant	SOD1	C:0.0002:1:1000Genomes|C:0.000156:1:1000Genomes_30X|C:0.000002:1:GnomAD_exomes|C:0.000013:2:GnomAD_genomes|C:0.000023:6:TOPMED|C:0.:0:ALFA
21	31662402	G>A	snv	537992551		by-frequency;by-alfa;by-cluster	2KB_upstream_variant;upstream_transcript_variant;intron_variant	SOD1;LOC124900469	A:0.0002:1:1000Genomes|A:0.000156:1:1000Genomes_30X|A:0.000013:2:GnomAD_genomes|A:0.000019:5:TOPMED|A:0.:0:ALFA
21	31661880	A>G	snv	538127098		by-frequency;by-alfa;by-cluster	intron_variant	SOD1	G:0.0002:1:1000Genomes|G:0.000312:2:1000Genomes_30X|G:0.000007:1:GnomAD_genomes|G:0.000138:1:Korea4K|G:0.:0:ALFA
21	31660799	T>G	snv	538162240		by-frequency;by-cluster	intron_variant	SOD1	G:0.0002:1:1000Genomes|G:0.000312:2:1000Genomes_30X|G:0.000007:1:GnomAD_genomes
21	31668105	C>A,G	snv	538168405		by-frequency;by-alfa;by-cluster	intron_variant	SOD1	G:0.0002:1:1000Genomes|G:0.000156:1:1000Genomes_30X|G:0.000007:1:GnomAD_genomes|A:0.000011:3:TOPMED|G:0.:0:ALFA
21	31662498	C>G	snv	538587007		by-frequency;by-alfa;by-cluster	2KB_upstream_variant;upstream_transcript_variant;intron_variant	SOD1;LOC124900469	G:0.0002:1:1000Genomes|G:0.000312:2:1000Genomes_30X|G:0.:0:ALSPAC|G:0.000033:5:GnomAD_genomes|G:0.000026:7:TOPMED|G:0.00027:1:TWINSUK|G:0.000142:2:ALFA
21	31661771	T>C	snv	538603815		by-frequency;by-alfa;by-cluster	intron_variant	SOD1	C:0.0002:1:1000Genomes|C:0.000156:1:1000Genomes_30X|C:0.00002:3:GnomAD_genomes|C:0.000026:7:TOPMED|C:0.:0:ALFA
21	31664738	C>A,T	snv	538674132		by-frequency;by-alfa;by-cluster	downstream_transcript_variant;intron_variant;500B_downstream_variant	SOD1;LOC124900469	T:0.00104:4:ALSPAC|T:0.00156:7:Estonian|T:0.00301:3:GoNL|C:0.5:1:Siberian|T:0.00027:1:TWINSUK|T:0.:0:ALFA
21	31661065	T>A	snv	538739634		by-frequency;by-alfa;by-cluster	intron_variant	SOD1	A:0.0002:1:1000Genomes|A:0.000312:2:1000Genomes_30X|A:0.00002:3:GnomAD_genomes|A:0.000011:3:TOPMED|A:0.000094:1:ALFA
21	31663043	A>G,T	snv	538919858		by-frequency;by-alfa;by-cluster	2KB_upstream_variant;upstream_transcript_variant;intron_variant	SOD1;LOC124900469	T:0.000399:2:1000Genomes|T:0.000312:2:1000Genomes_30X|T:0.000028:4:GnomAD_genomes|T:0.000015:4:TOPMED|T:0.:0:ALFA
21	31669185	T>G	snv	538956791		by-frequency;by-alfa;by-cluster	downstream_transcript_variant;500B_downstream_variant	SOD1	G:0.000399:2:1000Genomes|G:0.000008:2:TOPMED|G:0.000094:1:ALFA
21	31662795	A>T	snv	539362309		by-frequency	2KB_upstream_variant;upstream_transcript_variant;intron_variant	SOD1;LOC124900469	T:0.001:1:GoNL
21	31667037	GAGTTT>-	del	539706937		by-frequency;by-alfa;by-cluster	intron_variant	SOD1	-:0.001997:10:1000Genomes|-:0.002498:16:1000Genomes_30X|-:0.000223:1:Estonian|-:0.002304:952:GnomAD_exomes|-:0.000911:136:GnomAD_genomes|-:0.000495:131:TOPMED|-:0.000864:16:ALFA
21	31665980	T>C,G	snv	540128017		by-frequency;by-alfa;by-cluster	intron_variant	SOD1	G:0.000399:2:1000Genomes|G:0.000312:2:1000Genomes_30X|G:0.00002:3:GnomAD_genomes|C:0.000004:1:TOPMED|G:0.:0:ALFA
21	31659020	G>C	snv	540130008		by-frequency;by-cluster	2KB_upstream_variant;upstream_transcript_variant	SOD1	C:0.0002:1:1000Genomes|C:0.000312:2:1000Genomes_30X|C:0.000007:1:GnomAD_genomes
21	31666998	A>G	snv	540207911		by-frequency;by-alfa;by-cluster	intron_variant	SOD1	G:0.0002:1:1000Genomes|G:0.000156:1:1000Genomes_30X|G:0.000034:12:GnomAD_exomes|G:0.000248:37:GnomAD_genomes|G:0.000298:79:TOPMED|G:0.000142:2:ALFA
21	31661360	C>T	snv	540395658		by-frequency;by-alfa;by-cluster	intron_variant	SOD1	T:0.000399:2:1000Genomes|T:0.000156:1:1000Genomes_30X|T:0.000007:1:GnomAD_genomes|T:0.000004:1:TOPMED|T:0.:0:ALFA
21	31659889	C>G,T	snv	540569412		by-frequency;by-alfa;by-cluster	intron_variant	SOD1	T:0.0002:1:1000Genomes|T:0.000156:1:1000Genomes_30X|T:0.00012:14:ExAC|T:0.000087:13:GnomAD_genomes|T:0.00104:3:KOREAN|T:0.000042:11:TOPMED|T:0.:0:ALFA
21	31666146	->T	delins	540607817		by-frequency;by-alfa;by-cluster	intron_variant	SOD1	T:0.001797:9:1000Genomes|T:0.001874:12:1000Genomes_30X|T:0.00095:141:GnomAD_genomes|T:0.001217:322:TOPMED|TTTTTTT:0.000783:11:ALFA
21	31665017	G>A,T	snv	540767938		by-frequency;by-alfa;by-cluster	intron_variant	SOD1	A:0.000998:5:1000Genomes|A:0.001093:7:1000Genomes_30X|A:0.000094:14:GnomAD_genomes|T:0.000013:1:TOMMO|A:0.000098:26:TOPMED|A:0.000071:1:ALFA
21	31662741	G>A	snv	541409547		by-frequency;by-alfa;by-cluster	2KB_upstream_variant;upstream_transcript_variant;intron_variant	SOD1;LOC124900469	A:0.000399:2:1000Genomes|A:0.000074:11:GnomAD_genomes|A:0.000013:1:TOMMO|A:0.000057:15:TOPMED|A:0.:0:ALFA
21	31663603	A>C	snv	541621565		by-frequency;by-cluster	2KB_upstream_variant;upstream_transcript_variant;intron_variant	SOD1;LOC124900469	C:0.0002:1:1000Genomes|C:0.0003:2:1000Genomes_30X
21	31658453	A>G	snv	542008042		by-frequency;by-alfa;by-cluster	2KB_upstream_variant;upstream_transcript_variant	SOD1	G:0.0002:1:1000Genomes|G:0.000156:1:1000Genomes_30X|G:0.000007:1:GnomAD_genomes|G:0.:0:ALFA
21	31662066	C>T	snv	542384349		by-frequency;by-alfa;by-cluster	intron_variant	SOD1	T:0.001198:6:1000Genomes|T:0.000937:6:1000Genomes_30X|T:0.000577:86:GnomAD_genomes|T:0.000601:159:TOPMED|T:0.000416:6:ALFA
21	31657963	G>A,C,T	snv	542498471		by-frequency;by-alfa;by-cluster	2KB_upstream_variant;upstream_transcript_variant	SOD1	C:0.0004:2:1000Genomes|C:0.00047:3:1000Genomes_30X|C:0.00103:3:KOREAN|G:0.5:1:SGDP_PRJ|C:0.0001:8:TOMMO|C:0.:0:ALFA
21	31664211	G>A,C	snv	542566256		by-frequency;by-alfa;by-cluster	2KB_upstream_variant;upstream_transcript_variant;intron_variant	SOD1;LOC124900469	A:0.0002:1:1000Genomes|A:0.000156:1:1000Genomes_30X|A:0.000007:1:GnomAD_genomes|C:0.:0:ALFA
21	31660611	T>G	snv	543133889		by-frequency;by-alfa;by-cluster	intron_variant	SOD1	G:0.00006:9:GnomAD_genomes|G:0.001002:1:GoNL|G:0.000049:13:TOPMED|G:0.000285:4:ALFA
21	31665950	A>-	del	543822694		by-frequency;by-alfa;by-cluster	intron_variant	SOD1	-:0.000102:15:GnomAD_genomes|-:0.000011:3:TOPMED|-:0.:0:ALFA
21	31669355	A>G	snv	544034404		by-frequency;by-alfa;by-cluster	downstream_transcript_variant;500B_downstream_variant	SOD1	G:0.000027:4:GnomAD_genomes|A:0.5:2:SGDP_PRJ|G:0.:0:ALFA
21	31660694	C>T	snv	544194261		by-frequency;by-cluster	intron_variant	SOD1	T:0.0002:1:1000Genomes|T:0.000156:1:1000Genomes_30X|T:0.000007:1:GnomAD_genomes
21	31667568	T>C	snv	544194681		by-frequency;by-cluster	intron_variant	SOD1	C:0.0002:1:1000Genomes|C:0.000312:2:1000Genomes_30X|C:0.000007:1:GnomAD_genomes
21	31667042	T>G	snv	544232783		by-frequency;by-cluster	intron_variant	SOD1	G:0.0002:1:1000Genomes|G:0.000002:1:GnomAD_exomes|G:0.000007:1:GnomAD_genomes
21	31666223	C>T	snv	544325740		by-frequency;by-alfa;by-cluster	intron_variant	SOD1	T:0.0002:1:1000Genomes|T:0.000312:2:1000Genomes_30X|T:0.000013:2:GnomAD_genomes|T:0.000015:4:TOPMED|T:0.:0:ALFA
21	31665213	G>C	snv	544551373		by-frequency;by-alfa;by-cluster	intron_variant	SOD1	C:0.001398:7:1000Genomes|C:0.001093:7:1000Genomes_30X|C:0.000141:21:GnomAD_genomes|C:0.000023:6:TOPMED|C:0.:0:ALFA
21	31659418	A>G	snv	544559747		by-frequency;by-alfa;by-cluster	2KB_upstream_variant;upstream_transcript_variant	SOD1	G:0.000255:59:GnomAD_exomes|G:0.000268:40:GnomAD_genomes|A:0.375:3:SGDP_PRJ|G:0.00031:24:TOMMO|G:0.000193:51:TOPMED|G:0.000277:4:ALFA
21	31659234	T>A	snv	544719990		by-frequency;by-cluster	2KB_upstream_variant;upstream_transcript_variant	SOD1	A:0.0002:1:1000Genomes|A:0.000156:1:1000Genomes_30X|A:0.000007:1:GnomAD_genomes
21	31667612	G>A,C	snv	544820540		by-frequency;by-alfa;by-cluster	intron_variant	SOD1	A:0.0002:1:1000Genomes|A:0.000312:2:1000Genomes_30X|A:0.000446:2:Estonian|C:0.:0:KOREAN|G:0.5:1:SGDP_PRJ|A:0.000026:7:TOPMED|A:0.000108:2:ALFA
21	31659751	C>G,T	snv	544906408		by-frequency;by-alfa;by-cluster	5_prime_UTR_variant	SOD1	T:0.000025:3:ExAC|T:0.00002:3:GnomAD_genomes|T:0.000116:9:TOMMO|T:0.000011:3:TOPMED|T:0.:0:ALFA
21	31661501	C>A,T	snv	545031051		by-frequency;by-cluster	intron_variant	SOD1	T:0.0002:1:1000Genomes|T:0.000312:2:1000Genomes_30X|T:0.000007:1:GnomAD_genomes|A:0.000013:1:TOMMO
21	31664906	G>A,C,T	snv	546186619		by-frequency;by-alfa;by-cluster	downstream_transcript_variant;intron_variant;500B_downstream_variant	SOD1;LOC124900469	T:0.0004:2:1000Genomes|T:0.00031:2:1000Genomes_30X|C:0.:0:ALFA
21	31658089	G>A,C	snv	546188254		by-frequency;by-alfa;by-cluster	2KB_upstream_variant;upstream_transcript_variant	SOD1	A:0.000399:2:1000Genomes|A:0.000312:2:1000Genomes_30X|A:0.000602:83:GnomAD_genomes|G:0.5:1:SGDP_PRJ|A:0.000604:160:TOPMED|C:0.:0:ALFA
21	31664233	A>C	snv	546225062		by-frequency;by-alfa;by-cluster	2KB_upstream_variant;upstream_transcript_variant;intron_variant	SOD1;LOC124900469	C:0.0002:1:1000Genomes|C:0.000156:1:1000Genomes_30X|C:0.000495:79:GnomAD_exomes|C:0.000255:38:GnomAD_genomes|C:0.000336:89:TOPMED|C:0.000832:12:ALFA
21	31659524	C>A,T	snv	546242121		by-frequency;by-alfa;by-cluster	2KB_upstream_variant;upstream_transcript_variant	SOD1	T:0.0004:2:1000Genomes|T:0.00047:3:1000Genomes_30X|T:0.00069:2:KOREAN|T:0.00111:8:Korea4K|C:0.5:1:SGDP_PRJ|T:0.00077:60:TOMMO|T:0.:0:ALFA
21	31664688	G>A	snv	546553644		by-frequency;by-alfa;by-cluster	downstream_transcript_variant;intron_variant;500B_downstream_variant	SOD1;LOC124900469	A:0.000156:1:1000Genomes_30X|A:0.006027:27:Estonian|A:0.000912:136:GnomAD_genomes|A:0.001002:1:GoNL|A:0.018333:11:NorthernSweden|A:0.000103:8:TOMMO|A:0.000582:154:TOPMED|A:0.00217:41:ALFA
21	31664388	A>G,T	snv	547262607		by-frequency;by-alfa;by-cluster	non_coding_transcript_variant;intron_variant	SOD1;LOC124900469	T:0.0002:1:1000Genomes|T:0.000156:1:1000Genomes_30X|T:0.000047:7:GnomAD_genomes|G:0.000276:2:Korea4K|T:0.000053:14:TOPMED|T:0.:0:ALFA
21	31661146	C>A	snv	547410131		by-frequency;by-alfa;by-cluster	intron_variant	SOD1	A:0.000027:4:GnomAD_genomes|A:0.001002:1:GoNL|A:0.000015:4:TOPMED|A:0.000071:1:ALFA
21	31661788	T>C	snv	547498656		by-frequency;by-alfa;by-cluster	intron_variant	SOD1	C:0.000998:5:1000Genomes|C:0.001249:8:1000Genomes_30X|C:0.000777:116:GnomAD_genomes|C:0.00463:1:Qatari|C:0.000782:207:TOPMED|C:0.000498:7:ALFA
21	31667827	A>G	snv	547534378		by-frequency;by-cluster	intron_variant	SOD1	G:0.0002:1:1000Genomes|G:0.0002:1:1000Genomes_30X
21	31662268	T>G	snv	547755049		by-frequency;by-cluster	intron_variant	SOD1	G:0.0002:1:1000Genomes|G:0.000156:1:1000Genomes_30X|G:0.000007:1:GnomAD_genomes
21	31668027	->T	delins	547824111		by-frequency;by-alfa;by-cluster	intron_variant	SOD1	T:0.001797:9:1000Genomes|T:0.002186:14:1000Genomes_30X|T:0.000382:57:GnomAD_genomes|T:0.000053:14:TOPMED|TTTTTTT:0.000142:2:ALFA
21	31658672	C>T	snv	548046723		by-frequency;by-alfa;by-cluster	2KB_upstream_variant;upstream_transcript_variant	SOD1	T:0.000599:3:1000Genomes|T:0.000468:3:1000Genomes_30X|T:0.000027:4:GnomAD_genomes|T:0.000004:1:TOPMED|T:0.:0:ALFA
21	31664549	C>G,T	snv	548120103		by-frequency;by-alfa;by-cluster	downstream_transcript_variant;intron_variant;500B_downstream_variant	SOD1;LOC124900469	G:0.0002:1:1000Genomes|G:0.000156:1:1000Genomes_30X|G:0.00002:3:GnomAD_genomes|G:0.00463:1:Vietnamese|T:0.:0:ALFA
21	31662896	T>A	snv	548565552		by-frequency;by-cluster	2KB_upstream_variant;upstream_transcript_variant;intron_variant	SOD1;LOC124900469	A:0.0002:1:1000Genomes|A:0.000312:2:1000Genomes_30X|A:0.000007:1:GnomAD_genomes
21	31669026	C>T	snv	548739230		by-frequency;by-alfa;by-cluster	downstream_transcript_variant;500B_downstream_variant	SOD1	T:0.0002:1:1000Genomes|T:0.000156:1:1000Genomes_30X|T:0.000011:3:TOPMED|T:0.:0:ALFA
21	31669130	->TCATTTTAG	delins	549136432		by-frequency;by-alfa;by-cluster	downstream_transcript_variant;500B_downstream_variant	SOD1	TTAGTCATT:0.001398:7:1000Genomes|TTAGTCATT:0.001249:8:1000Genomes_30X|TTAGTCATT:0.001654:247:GnomAD_genomes|TTAGTCATT:0.001991:527:TOPMED|TTAGTCATTTTAGTCATTTTAG:0.001423:20:ALFA
21	31664858	C>T	snv	549186188		by-frequency;by-alfa;by-cluster	downstream_transcript_variant;intron_variant;500B_downstream_variant	SOD1;LOC124900469	T:0.0002:1:1000Genomes|T:0.000312:2:1000Genomes_30X|T:0.000047:7:GnomAD_genomes|T:0.000026:7:TOPMED|T:0.000071:1:ALFA
21	31662317	G>A,C	snv	549208481		by-frequency;by-alfa;by-cluster	2KB_upstream_variant;upstream_transcript_variant;intron_variant	SOD1;LOC124900469	A:0.0013:5:ALSPAC|A:0.002:2:GoNL|A:0.00108:4:TWINSUK|A:0.00014:2:ALFA
21	31667139	A>G	snv	549304039		by-frequency;by-alfa;by-cluster	intron_variant	SOD1	G:0.0002:1:1000Genomes|G:0.000156:1:1000Genomes_30X|G:0.000002:1:GnomAD_exomes|G:0.000007:1:GnomAD_genomes|G:0.000004:1:TOPMED|G:0.:0:ALFA
21	31660663	G>A,C	snv	549496955		by-frequency;by-alfa;by-cluster	intron_variant	SOD1	C:0.00002:3:GnomAD_genomes|G:0.333333:2:SGDP_PRJ|C:0.:0:ALFA
21	31661596	T>A,G	snv	549517711		by-frequency;by-alfa;by-cluster	intron_variant	SOD1	G:0.001198:6:1000Genomes|G:0.000937:6:1000Genomes_30X|G:0.00003:8:TOPMED|G:0.:0:ALFA
21	31667730	A>T	snv	549744846		by-frequency;by-alfa;by-cluster	intron_variant	SOD1	T:0.0002:1:1000Genomes|T:0.000312:2:1000Genomes_30X|T:0.000047:7:GnomAD_genomes|T:0.00463:1:Qatari|T:0.:0:ALFA
21	31667200	A>G,T	snv	549784212		by-frequency;by-alfa;by-cluster	intron_variant	SOD1	T:0.0002:1:1000Genomes|T:0.000156:1:1000Genomes_30X|T:0.00002:3:GnomAD_genomes|T:0.000026:7:TOPMED|T:0.:0:ALFA
21	31669183	A>G,T	snv	549969290		by-frequency;by-alfa;by-cluster	downstream_transcript_variant;500B_downstream_variant	SOD1	T:0.000399:2:1000Genomes|T:0.000007:1:GnomAD_genomes|T:0.:0:ALFA
21	31662994	G>A	snv	549984048		by-frequency;by-alfa;by-cluster	2KB_upstream_variant;upstream_transcript_variant;intron_variant	SOD1;LOC124900469	A:0.003994:20:1000Genomes|A:0.003592:23:1000Genomes_30X|A:0.002305:341:GnomAD_genomes|G:0.5:2:SGDP_PRJ|A:0.002524:668:TOPMED|A:0.002207:27:ALFA
21	31660776	C>T	snv	550584052		by-frequency;by-alfa;by-cluster	intron_variant	SOD1	T:0.000011:3:TOPMED|T:0.:0:ALFA
21	31659925	C>A,G,T	snv	550598897		by-frequency;by-alfa;by-cluster	intron_variant	SOD1	G:0.0002:1:1000Genomes|G:0.00016:1:1000Genomes_30X|A:0.00104:3:KOREAN|A:0.00028:2:Korea4K|G:0.:0:ALFA
21	31666510	T>C	snv	550738116		by-frequency;by-cluster	coding_sequence_variant;synonymous_variant	SOD1	C:0.0002:1:1000Genomes|C:0.000156:1:1000Genomes_30X|C:0.000009:1:ExAC|C:0.000007:1:GnomAD_genomes
21	31665906	A>C	snv	551177192		by-frequency;by-alfa;by-cluster	intron_variant	SOD1	C:0.000399:2:1000Genomes|C:0.000312:2:1000Genomes_30X|C:0.000262:39:GnomAD_genomes|C:0.000351:93:TOPMED|C:0.000214:3:ALFA
21	31666405	C>A,G,T	snv	551299649		by-frequency;by-cluster	intron_variant	SOD1	C:0.5:1:SGDP_PRJ
21	31659041	A>G	snv	551689387			2KB_upstream_variant;upstream_transcript_variant	SOD1
21	31659729	G>A	snv	551822673		by-frequency;by-alfa;by-cluster	5_prime_UTR_variant	SOD1	A:0.0000057:8:GnomAD_exomes|A:0.0000201:3:GnomAD_genomes|A:0.0000508:1:ALFA
21	31667090	G>C,T	snv	551934450		by-frequency;by-alfa;by-cluster	intron_variant	SOD1	T:0.0002:1:1000Genomes|T:0.000156:1:1000Genomes_30X|T:0.000002:1:GnomAD_exomes|T:0.000027:4:GnomAD_genomes|T:0.:0:ALFA
21	31659510	G>A,C,T	snv	551959904		by-frequency;by-alfa;by-cluster	2KB_upstream_variant;upstream_transcript_variant	SOD1	A:0.0002:1:1000Genomes|A:0.000312:2:1000Genomes_30X|A:0.00002:3:GnomAD_genomes|G:0.5:1:SGDP_PRJ|C:0.:0:ALFA
21	31660220	G>A,T	snv	551989025		by-frequency;by-alfa;by-cluster	intron_variant	SOD1	A:0.000399:2:1000Genomes|A:0.000312:2:1000Genomes_30X|A:0.000259:1:ALSPAC|A:0.006473:29:Estonian|A:0.001577:1:GnomAD_exomes|A:0.001287:192:GnomAD_genomes|G:0.5:1:SGDP_PRJ|A:0.000103:8:TOMMO|A:0.00027:1:TWINSUK|A:0.001643:31:ALFA
21	31658823	C>T	snv	552098338		by-frequency;by-cluster	2KB_upstream_variant;upstream_transcript_variant	SOD1	T:0.000399:2:1000Genomes|T:0.000156:1:1000Genomes_30X|T:0.000007:1:GnomAD_genomes
21	31664767	C>T	snv	553266775		by-frequency;by-alfa;by-cluster	downstream_transcript_variant;intron_variant;500B_downstream_variant	SOD1;LOC124900469	T:0.0002:1:1000Genomes|T:0.000312:2:1000Genomes_30X|T:0.000101:15:GnomAD_genomes|T:0.000168:13:TOMMO|T:0.000094:25:TOPMED|T:0.000071:1:ALFA
21	31657938	G>A	snv	553509064		by-frequency;by-alfa;by-cluster	2KB_upstream_variant;upstream_transcript_variant	SOD1	A:0.0002:1:1000Genomes|A:0.000312:2:1000Genomes_30X|A:0.000013:2:GnomAD_genomes|A:0.000004:1:TOPMED|A:0.:0:ALFA
21	31659760	C>A,G,T	snv	553644744		by-frequency;by-alfa;by-cluster	5_prime_UTR_variant	SOD1	T:0.000008:1:ExAC|T:0.000007:1:GnomAD_genomes|T:0.000008:2:TOPMED|T:0.:0:ALFA
21	31662542	A>G	snv	553704871		by-frequency;by-alfa;by-cluster	2KB_upstream_variant;upstream_transcript_variant;intron_variant	SOD1;LOC124900469	G:0.0002:1:1000Genomes|G:0.000156:1:1000Genomes_30X|G:0.000074:11:GnomAD_genomes|G:0.000057:15:TOPMED|G:0.000071:1:ALFA
21	31668639	A>C,G,T	snv	553743756		by-frequency;by-alfa;by-cluster	3_prime_UTR_variant	SOD1	T:0.0002:1:1000Genomes|T:0.00031:2:1000Genomes_30X|T:0.0001:8:TOMMO|C:0.:0:ALFA
21	31661160	G>T	snv	553812447		by-frequency;by-alfa;by-cluster	intron_variant	SOD1	T:0.0002:1:1000Genomes|T:0.000156:1:1000Genomes_30X|T:0.00002:3:GnomAD_genomes|T:0.000113:30:TOPMED|T:0.000142:2:ALFA
21	31664033	G>A	snv	554122649		by-frequency;by-alfa;by-cluster	2KB_upstream_variant;upstream_transcript_variant;intron_variant	SOD1;LOC124900469	A:0.0002:1:1000Genomes|A:0.000156:1:1000Genomes_30X|A:0.000043:21:GnomAD_exomes|A:0.000067:10:GnomAD_genomes|A:0.000013:1:TOMMO|A:0.000042:11:TOPMED|A:0.000071:1:ALFA
21	31663327	G>A	snv	554161758		by-frequency;by-alfa;by-cluster	2KB_upstream_variant;upstream_transcript_variant;intron_variant	SOD1;LOC124900469	A:0.0002:1:1000Genomes|A:0.000781:5:1000Genomes_30X|A:0.000087:13:GnomAD_genomes|A:0.005476:16:KOREAN|A:0.004009:29:Korea4K|A:0.003861:299:TOMMO|A:0.00014:37:TOPMED|A:0.:0:ALFA
21	31668773	T>C	snv	554734047		by-frequency;by-cluster	3_prime_UTR_variant	SOD1	C:0.0002:1:1000Genomes|C:0.000156:1:1000Genomes_30X|C:0.000007:1:GnomAD_genomes
21	31663268	A>C,G	snv	555160035		by-frequency;by-alfa;by-cluster	2KB_upstream_variant;upstream_transcript_variant;intron_variant	SOD1;LOC124900469	C:0.001297:5:ALSPAC|C:0.002004:2:GoNL|C:0.000427:113:TOPMED|C:0.001079:4:TWINSUK|C:0.000582:11:ALFA
21	31659716	T>C,G	snv	555453865		by-frequency;by-alfa;by-cluster	5_prime_UTR_variant	SOD1	G:0.0002:1:1000Genomes|G:0.000312:2:1000Genomes_30X|C:0.000004:1:TOPMED|C:0.:0:ALFA
21	31666129	G>A	snv	555492510		by-frequency;by-alfa;by-cluster	intron_variant	SOD1	A:0.0002:1:1000Genomes|A:0.000312:2:1000Genomes_30X|A:0.000067:10:GnomAD_genomes|A:0.000053:14:TOPMED|A:0.009346:2:Vietnamese|A:0.:0:ALFA
21	31664130	C>A,T	snv	555553482		by-frequency;by-alfa;by-cluster	2KB_upstream_variant;upstream_transcript_variant;intron_variant	SOD1;LOC124900469	A:0.001398:7:1000Genomes|A:0.001093:7:1000Genomes_30X|A:0.000141:21:GnomAD_genomes|T:0.:0:ALFA
21	31658121	T>C	snv	555866100		by-frequency;by-alfa;by-cluster	2KB_upstream_variant;upstream_transcript_variant	SOD1	C:0.0002:1:1000Genomes|C:0.000156:1:1000Genomes_30X|C:0.000357:51:GnomAD_genomes|C:0.001002:1:GoNL|C:0.000276:73:TOPMED|C:0.000693:10:ALFA
21	31660314	T>C	snv	556065150		by-frequency;by-alfa;by-cluster	intron_variant	SOD1	C:0.0002:1:1000Genomes|C:0.000156:1:1000Genomes_30X|C:0.000013:2:GnomAD_genomes|C:0.:0:ALFA
21	31660841	G>T	snv	556121537		by-frequency;by-alfa;by-cluster	intron_variant	SOD1	T:0.0002:1:1000Genomes|T:0.000156:1:1000Genomes_30X|T:0.00002:3:GnomAD_genomes|T:0.000053:14:TOPMED|T:0.:0:ALFA
21	31668612	C>A,T	snv	556141480		by-frequency;by-alfa;by-cluster	3_prime_UTR_variant	SOD1	A:0.000399:2:1000Genomes|A:0.000468:3:1000Genomes_30X|A:0.000008:1:ExAC|T:0.:0:ALFA
21	31660469	G>A	snv	556158357		by-frequency;by-cluster	intron_variant	SOD1	A:0.0002:1:1000Genomes|A:0.000156:1:1000Genomes_30X|A:0.000007:1:GnomAD_genomes
21	31668141	T>A,C	snv	556190188		by-frequency;by-alfa;by-cluster	intron_variant	SOD1	C:0.0002:1:1000Genomes|C:0.00031:2:1000Genomes_30X|A:0.00005:4:TOMMO|C:0.:0:ALFA
21	31661928	T>C	snv	556456850		by-frequency;by-alfa;by-cluster	intron_variant	SOD1	C:0.0002:1:1000Genomes|C:0.000156:1:1000Genomes_30X|C:0.000047:7:GnomAD_genomes|C:0.000053:14:TOPMED|C:0.:0:ALFA
21	31658886	G>A,T	snv	557253710		by-frequency;by-alfa;by-cluster	2KB_upstream_variant;upstream_transcript_variant	SOD1	A:0.0002:1:1000Genomes|A:0.000312:2:1000Genomes_30X|A:0.00004:6:GnomAD_genomes|A:0.000065:5:TOMMO|T:0.:0:ALFA
21	31661885	C>G	snv	557332194		by-cluster	intron_variant	SOD1
21	31658588	C>G,T	snv	557396022		by-frequency;by-cluster	2KB_upstream_variant;upstream_transcript_variant	SOD1	G:0.0002:1:1000Genomes|G:0.000156:1:1000Genomes_30X|G:0.000007:1:GnomAD_genomes|C:0.5:1:SGDP_PRJ
21	31660567	G>C	snv	557528938		by-frequency;by-alfa;by-cluster	intron_variant	SOD1	C:0.0002:1:1000Genomes|C:0.000156:1:1000Genomes_30X|C:0.000107:16:GnomAD_genomes|C:0.000113:30:TOPMED|C:0.000071:1:ALFA
21	31665343	T>C	snv	557605838		by-frequency;by-cluster	intron_variant	SOD1	C:0.0002:1:1000Genomes|C:0.000312:2:1000Genomes_30X|C:0.000007:1:GnomAD_genomes
21	31662889	C>T	snv	557663324		by-frequency;by-alfa;by-cluster	2KB_upstream_variant;upstream_transcript_variant;intron_variant	SOD1;LOC124900469	T:0.00002:3:GnomAD_genomes|T:0.001002:1:GoNL|T:0.000011:3:TOPMED|T:0.:0:ALFA
21	31664104	T>C,G	snv	558191243		by-frequency;by-alfa;by-cluster	2KB_upstream_variant;upstream_transcript_variant;intron_variant	SOD1;LOC124900469	G:0.0002:1:1000Genomes|G:0.00016:1:1000Genomes_30X|G:0.:0:ALFA
21	31665021	C>G,T	snv	559274935		by-frequency;by-alfa;by-cluster	intron_variant	SOD1	T:0.0002:1:1000Genomes|T:0.000156:1:1000Genomes_30X|T:0.000446:2:Estonian|T:0.00006:9:GnomAD_genomes|T:0.000108:2:ALFA
21	31664032	C>T	snv	559407424		by-frequency;by-alfa;by-cluster	2KB_upstream_variant;upstream_transcript_variant;intron_variant	SOD1;LOC124900469	T:0.000029:14:GnomAD_exomes|T:0.000013:2:GnomAD_genomes|T:0.001002:1:GoNL|T:0.000155:12:TOMMO|T:0.000015:4:TOPMED|T:0.:0:ALFA
21	31664534	A>G,T	snv	559528368		by-frequency;by-alfa;by-cluster	downstream_transcript_variant;intron_variant;500B_downstream_variant	SOD1;LOC124900469	G:0.0002:1:1000Genomes|G:0.000312:2:1000Genomes_30X|G:0.000007:1:GnomAD_genomes|T:0.:0:ALFA
21	31668971	A>G	snv	559726952		by-frequency;by-alfa;by-cluster	downstream_transcript_variant;500B_downstream_variant	SOD1	G:0.0002:1:1000Genomes|G:0.000156:1:1000Genomes_30X|G:0.000058:4:GnomAD_exomes|G:0.000033:5:GnomAD_genomes|G:0.001369:4:KOREAN|G:0.001092:2:Korea1K|G:0.001935:14:Korea4K|G:0.000362:28:TOMMO|G:0.000068:18:TOPMED|G:0.000071:1:ALFA
21	31663626	A>G	snv	559747566		by-frequency;by-alfa;by-cluster	2KB_upstream_variant;upstream_transcript_variant;intron_variant	SOD1;LOC124900469	G:0.0002:1:1000Genomes|G:0.000156:1:1000Genomes_30X|G:0.000013:2:GnomAD_genomes|G:0.000026:7:TOPMED|G:0.:0:ALFA
21	31661988	A>G	snv	559905321		by-frequency;by-alfa;by-cluster	intron_variant	SOD1	G:0.000998:5:1000Genomes|G:0.001093:7:1000Genomes_30X|G:0.000536:80:GnomAD_genomes|G:0.000536:142:TOPMED|G:0.000693:10:ALFA
21	31667631	G>T	snv	560724749		by-frequency;by-alfa;by-cluster	intron_variant	SOD1	T:0.0002:1:1000Genomes|T:0.000156:1:1000Genomes_30X|T:0.00002:3:GnomAD_genomes|T:0.000342:1:KOREAN|T:0.:0:Korea1K|T:0.000691:5:Korea4K|T:0.000517:40:TOMMO|T:0.000042:11:TOPMED|T:0.:0:ALFA
21	31668237	T>C	snv	561175941		by-frequency;by-alfa;by-cluster	intron_variant	SOD1	C:0.0002:1:1000Genomes|C:0.000312:2:1000Genomes_30X|C:0.000114:17:GnomAD_genomes|C:0.000147:39:TOPMED|C:0.000071:1:ALFA
21	31668656	A>G	snv	561195887		by-frequency;by-alfa;by-cluster	3_prime_UTR_variant	SOD1	G:0.0002:1:1000Genomes|G:0.000156:1:1000Genomes_30X|G:0.00001:9:GnomAD_exomes|G:0.000013:2:GnomAD_genomes|A:0.5:1:SGDP_PRJ|G:0.000004:1:TOPMED|G:0.000094:1:ALFA
21	31667715	T>G	snv	561217440		by-frequency;by-alfa;by-cluster	intron_variant	SOD1	G:0.001597:8:1000Genomes|G:0.001405:9:1000Genomes_30X|G:0.00154:230:GnomAD_genomes|G:0.001825:483:TOPMED|G:0.001803:26:ALFA
21	31661653	C>G,T	snv	561355893		by-frequency;by-alfa;by-cluster	intron_variant	SOD1	T:0.0002:1:1000Genomes|T:0.00052:2:ALSPAC|T:0.00022:1:Estonian|T:0.00003:2:TOMMO|T:0.00162:6:TWINSUK|T:0.00042:8:ALFA
21	31665140	A>G	snv	561466769		by-frequency;by-alfa;by-cluster	intron_variant	SOD1	A:0.5:2:SGDP_PRJ|G:0.000004:1:TOPMED|G:0.:0:ALFA
21	31666337	G>A	snv	561549175		by-frequency;by-alfa;by-cluster	intron_variant	SOD1	A:0.000259:1:ALSPAC|A:0.000072:42:GnomAD_exomes|A:0.00004:6:GnomAD_genomes|A:0.001002:1:GoNL|A:0.000685:2:KOREAN|G:0.5:1:SGDP_PRJ|A:0.000026:7:TOPMED|A:0.000539:2:TWINSUK|A:0.000071:1:ALFA
21	31658037	G>A,T	snv	562285763		by-frequency;by-alfa;by-cluster	2KB_upstream_variant;upstream_transcript_variant	SOD1	T:0.000399:2:1000Genomes|T:0.002136:238:GnomAD_genomes|T:0.008016:8:GoNL|T:0.083333:1:SGDP_PRJ|T:0.001405:372:TOPMED|T:0.000357:5:ALFA
21	31661468	A>C,G	snv	562463901		by-frequency;by-alfa;by-cluster	intron_variant	SOD1	G:0.0002:1:1000Genomes|G:0.000013:2:GnomAD_genomes|C:0.000026:2:TOMMO|G:0.000019:5:TOPMED|G:0.:0:ALFA
21	31667043	A>G	snv	562543108		by-frequency;by-cluster	intron_variant	SOD1	G:0.0002:1:1000Genomes|G:0.000312:2:1000Genomes_30X|G:0.000007:1:GnomAD_genomes
21	31659730	C>G,T	snv	562601052		by-frequency;by-alfa;by-cluster	5_prime_UTR_variant	SOD1	T:0.0002:1:1000Genomes|T:0.000312:2:1000Genomes_30X|T:0.000017:2:ExAC|T:0.000027:4:GnomAD_genomes|T:0.000023:6:TOPMED|T:0.00013:3:ALFA
21	31659408	C>A	snv	563137933		by-frequency;by-alfa;by-cluster	2KB_upstream_variant;upstream_transcript_variant	SOD1	A:0.001997:10:1000Genomes|A:0.001718:11:1000Genomes_30X|A:0.000264:57:GnomAD_exomes|A:0.000348:52:GnomAD_genomes|A:0.008898:26:KOREAN|A:0.008571:62:Korea4K|A:0.002996:232:TOMMO|A:0.000548:145:TOPMED|A:0.004673:1:Vietnamese|A:0.:0:ALFA
21	31665593	T>A,C	snv	563176666		by-frequency;by-alfa;by-cluster	intron_variant	SOD1	C:0.0004:2:1000Genomes|C:0.00031:2:1000Genomes_30X|A:0.00022:1:Estonian|A:0.00007:1:ALFA
21	31665120	A>G	snv	563212865		by-frequency;by-cluster	intron_variant	SOD1	G:0.000599:3:1000Genomes|G:0.000312:2:1000Genomes_30X|G:0.000007:1:GnomAD_genomes
21	31658810	T>C	snv	563532768		by-frequency;by-alfa;by-cluster	2KB_upstream_variant;upstream_transcript_variant	SOD1	C:0.000399:2:1000Genomes|C:0.000468:3:1000Genomes_30X|C:0.00002:3:GnomAD_genomes|C:0.000038:10:TOPMED|C:0.:0:ALFA
21	31664221	C>A,T	snv	563668113		by-frequency;by-alfa;by-cluster	2KB_upstream_variant;upstream_transcript_variant;intron_variant	SOD1;LOC124900469	A:0.000399:2:1000Genomes|A:0.000468:3:1000Genomes_30X|A:0.000006:1:GnomAD_exomes|A:0.000004:1:TOPMED|T:0.:0:ALFA
21	31665674	G>A	snv	563913713		by-frequency;by-alfa;by-cluster	intron_variant	SOD1	A:0.0002:1:1000Genomes|A:0.000312:2:1000Genomes_30X|A:0.000034:5:GnomAD_genomes|A:0.000042:11:TOPMED|A:0.000214:3:ALFA
21	31660200	T>G	snv	563959424		by-frequency;by-cluster	intron_variant	SOD1	G:0.0016:3:Korea1K
21	31662810	G>-,GG	delins	564031072		by-frequency;by-alfa;by-cluster	2KB_upstream_variant;upstream_transcript_variant;intron_variant	SOD1;LOC124900469	-:0.000799:4:1000Genomes|-:0.001093:7:1000Genomes_30X|-:0.000402:60:GnomAD_genomes|GGG:0.:0:ALFA
21	31658091	C>G	snv	564509959		by-frequency;by-alfa;by-cluster	2KB_upstream_variant;upstream_transcript_variant	SOD1	G:0.0002:1:1000Genomes|G:0.000156:1:1000Genomes_30X|G:0.000029:4:GnomAD_genomes|G:0.000042:11:TOPMED|G:0.:0:ALFA
21	31664926	G>A,T	snv	564541974		by-frequency;by-alfa;by-cluster	downstream_transcript_variant;intron_variant;500B_downstream_variant	SOD1;LOC124900469	T:0.002596:13:1000Genomes|T:0.003592:23:1000Genomes_30X|T:0.002527:377:GnomAD_genomes|G:0.5:1:SGDP_PRJ|T:0.000278:4:ALFA
21	31662718	A>G	snv	565171791		by-frequency;by-alfa;by-cluster	2KB_upstream_variant;upstream_transcript_variant;intron_variant	SOD1;LOC124900469	G:0.0002:1:1000Genomes|G:0.000156:1:1000Genomes_30X|G:0.000013:2:GnomAD_genomes|G:0.:0:ALFA
21	31662201	C>T	snv	565211656		by-frequency;by-cluster	intron_variant	SOD1	T:0.0002:1:1000Genomes|T:0.000156:1:1000Genomes_30X|T:0.000007:1:GnomAD_genomes
21	31669243	C>A,T	snv	565378668		by-frequency;by-alfa;by-cluster	downstream_transcript_variant;500B_downstream_variant	SOD1	A:0.0002:1:1000Genomes|A:0.00031:2:1000Genomes_30X|T:0.:0:ALFA
21	31668345	A>C,G	snv	565581880		by-frequency;by-alfa;by-cluster	intron_variant	SOD1	C:0.0002:1:1000Genomes|C:0.00016:1:1000Genomes_30X|G:0.:0:ALFA
21	31662785	C>T	snv	565608772		by-frequency;by-alfa;by-cluster	2KB_upstream_variant;upstream_transcript_variant;intron_variant	SOD1;LOC124900469	T:0.000399:2:1000Genomes|T:0.000312:2:1000Genomes_30X|T:0.000893:4:Estonian|T:0.000871:130:GnomAD_genomes|T:0.001002:1:GoNL|T:0.000026:2:TOMMO|T:0.000023:6:TOPMED|T:0.000212:4:ALFA
21	31663903	G>A	snv	565804287		by-frequency;by-cluster	2KB_upstream_variant;upstream_transcript_variant;intron_variant	SOD1;LOC124900469	A:0.0002:1:1000Genomes|A:0.000312:2:1000Genomes_30X|A:0.000007:1:GnomAD_genomes|A:0.000013:1:TOMMO
21	31658111	C>T	snv	565859287		by-frequency;by-alfa;by-cluster	2KB_upstream_variant;upstream_transcript_variant	SOD1	T:0.0002:1:1000Genomes|T:0.000312:2:1000Genomes_30X|T:0.000033:5:GnomAD_genomes|T:0.000034:9:TOPMED|T:0.:0:ALFA
21	31662287	C>A,T	snv	565968936		by-frequency;by-alfa;by-cluster	intron_variant	SOD1	A:0.0002:1:1000Genomes|A:0.000156:1:1000Genomes_30X|A:0.000007:1:GnomAD_genomes|T:0.:0:ALFA
21	31663117	G>A	snv	565969842		by-frequency;by-alfa;by-cluster	2KB_upstream_variant;upstream_transcript_variant;intron_variant	SOD1;LOC124900469	A:0.0002:1:1000Genomes|A:0.000021:3:GnomAD_genomes|A:0.000065:5:TOMMO|A:0.:0:ALFA
21	31668506	A>G	snv	566007659		by-frequency;by-cluster	coding_sequence_variant;synonymous_variant	SOD1	G:0.0002:1:1000Genomes|G:0.000312:2:1000Genomes_30X|G:0.000008:1:ExAC|G:0.000007:1:GnomAD_genomes
21	31660250	C>T	snv	567097047		by-frequency;by-alfa;by-cluster	intron_variant	SOD1	T:0.001797:9:1000Genomes|T:0.001874:12:1000Genomes_30X|T:0.00138:206:GnomAD_genomes|T:0.001534:406:TOPMED|T:0.000763:11:ALFA
21	31662996	C>T	snv	567379063		by-frequency;by-cluster	intron_variant;upstream_transcript_variant;2KB_upstream_variant	SOD1;LOC124900469	T:0.000399:2:1000Genomes|T:0.000312:2:1000Genomes_30X|T:0.000014:2:GnomAD_genomes
21	31669345	A>C,G	snv	567488048		by-frequency;by-alfa;by-cluster	downstream_transcript_variant;500B_downstream_variant	SOD1	G:0.000007:1:GnomAD_genomes|C:0.001002:1:GoNL|G:0.000004:1:TOPMED|G:0.:0:ALFA
21	31664579	A>C,T	snv	567608751		by-frequency;by-alfa;by-cluster	downstream_transcript_variant;intron_variant;500B_downstream_variant	SOD1;LOC124900469	T:0.000259:1:ALSPAC|T:0.001563:7:Estonian|T:0.001302:2:GnomAD_exomes|T:0.000242:36:GnomAD_genomes|T:0.002004:2:GoNL|T:0.000809:3:TWINSUK|T:0.000371:7:ALFA
21	31667158	C>A,T	snv	567629259		by-frequency;by-alfa;by-cluster	intron_variant	SOD1	T:0.000399:2:1000Genomes|T:0.000312:2:1000Genomes_30X|T:0.00027:188:GnomAD_exomes|T:0.000234:35:GnomAD_genomes|T:0.000283:75:TOPMED|T:0.000139:2:ALFA
21	31660364	C>A	snv	567872788		by-frequency;by-cluster	intron_variant	SOD1	A:0.0002:1:1000Genomes|A:0.000156:1:1000Genomes_30X|A:0.000007:1:GnomAD_genomes
21	31659554	A>C,G	snv	568078232		by-frequency;by-alfa;by-cluster	2KB_upstream_variant;upstream_transcript_variant	SOD1	C:0.000998:5:1000Genomes|G:0.000007:1:GnomAD_genomes|G:0.000004:1:TOPMED|G:0.:0:ALFA
21	31665854	A>G	snv	568129756		by-frequency;by-alfa;by-cluster	intron_variant	SOD1	G:0.0002:1:1000Genomes|G:0.000312:2:1000Genomes_30X|G:0.000121:18:GnomAD_genomes|G:0.000162:43:TOPMED|G:0.000071:1:ALFA
21	31659936	G>C	snv	568944487		by-frequency;by-alfa;by-cluster	intron_variant	SOD1	C:0.0037939:19:1000Genomes|C:0.0028107:18:1000Genomes_30X|C:0.0004135:453:GnomAD_exomes|C:0.0039822:594:GnomAD_genomes|C:0.0048623:1287:TOPMED|C:0.0044383:64:ALFA
21	31660849	A>C,G,T	snv	569146356		by-frequency;by-alfa;by-cluster	intron_variant	SOD1	T:0.00055:1:Korea1K|A:0.5:1:SGDP_PRJ|T:0.:0:ALFA
21	31664034	C>G	snv	569359601		by-frequency;by-alfa;by-cluster	intron_variant;upstream_transcript_variant;2KB_upstream_variant	SOD1;LOC124900469	G:0.0002:1:1000Genomes|G:0.000156:1:1000Genomes_30X|G:0.000037:18:GnomAD_exomes|G:0.000054:8:GnomAD_genomes|G:0.000026:7:TOPMED|G:0.:0:ALFA
21	31665977	T>G	snv	569522128		by-frequency;by-alfa;by-cluster	intron_variant	SOD1	G:0.0002:1:1000Genomes|G:0.000156:1:1000Genomes_30X|G:0.000014:2:GnomAD_genomes|G:0.:0:KOREAN|G:0.000019:5:TOPMED|G:0.:0:ALFA
21	31665365	A>C,G	snv	569558836		by-frequency;by-alfa;by-cluster	intron_variant	SOD1	C:0.0002:1:1000Genomes|C:0.00016:1:1000Genomes_30X|C:0.00026:1:ALSPAC|C:0.00027:1:TWINSUK|G:0.:0:ALFA
21	31665055	A>G	snv	569973474		by-frequency;by-alfa;by-cluster	intron_variant	SOD1	G:0.000259:1:ALSPAC|G:0.000268:40:GnomAD_genomes|G:0.001002:1:GoNL|G:0.000291:77:TOPMED|G:0.:0:TWINSUK|G:0.000139:2:ALFA
21	31658843	C>T	snv	570101341		by-frequency;by-alfa;by-cluster	2KB_upstream_variant;upstream_transcript_variant	SOD1	T:0.000599:3:1000Genomes|T:0.000468:3:1000Genomes_30X|T:0.000194:29:GnomAD_genomes|C:0.5:1:SGDP_PRJ|T:0.000079:21:TOPMED|T:0.000071:1:ALFA
21	31662939	T>A,C	snv	570136750		by-frequency;by-alfa;by-cluster	intron_variant;upstream_transcript_variant;2KB_upstream_variant	SOD1;LOC124900469	C:0.0002:1:1000Genomes|C:0.00094:6:1000Genomes_30X|C:0.00067:3:Estonian|C:0.00018:3:ALFA
21	31662381	G>T	snv	570171978		by-frequency;by-alfa;by-cluster	intron_variant;upstream_transcript_variant;2KB_upstream_variant	SOD1;LOC124900469	T:0.000599:3:1000Genomes|T:0.000312:2:1000Genomes_30X|T:0.000054:8:GnomAD_genomes|T:0.000049:13:TOPMED|T:0.000071:1:ALFA
21	31661859	T>A,C	snv	570249693		by-frequency;by-alfa;by-cluster	intron_variant	SOD1	A:0.00016:1:1000Genomes_30X|C:0.001:1:GoNL|C:0.00034:1:KOREAN|C:0.:0:ALFA
21	31664711	C>T	snv	571290210		by-frequency;by-alfa;by-cluster	downstream_transcript_variant;intron_variant;500B_downstream_variant	SOD1;LOC124900469	T:0.000446:2:Estonian|T:0.000221:33:GnomAD_genomes|T:0.001002:1:GoNL|T:0.00023:61:TOPMED|T:0.000371:7:ALFA
21	31660878	A>G	snv	571355908		by-frequency;by-alfa;by-cluster	intron_variant	SOD1	G:0.0002:1:1000Genomes|G:0.000156:1:1000Genomes_30X|G:0.00002:3:GnomAD_genomes|G:0.:0:ALFA
21	31669184	T>A	snv	571417345		by-frequency;by-alfa;by-cluster	downstream_transcript_variant;500B_downstream_variant	SOD1	A:0.000399:2:1000Genomes|A:0.000008:2:TOPMED|A:0.000094:1:ALFA
21	31666608	C>T	snv	571455001		by-frequency;by-alfa;by-cluster	intron_variant	SOD1	T:0.0002:1:1000Genomes|T:0.000312:2:1000Genomes_30X|T:0.000059:47:GnomAD_exomes|T:0.000034:5:GnomAD_genomes|T:0.001002:1:GoNL|T:0.00463:1:Qatari|T:0.000019:5:TOPMED|T:0.:0:ALFA
21	31663775	G>C	snv	571455561		by-frequency;by-alfa;by-cluster	intron_variant;upstream_transcript_variant;2KB_upstream_variant	SOD1;LOC124900469	C:0.0011981:6:1000Genomes|C:0.0009369:6:1000Genomes_30X|C:0.0001895:23:ExAC|C:0.0000526:72:GnomAD_exomes|C:0.0000402:6:GnomAD_genomes|C:0.0000038:1:TOPMED|C:0.:0:ALFA
21	31668625	C>T	snv	571521279		by-frequency;by-alfa;by-cluster	3_prime_UTR_variant	SOD1	T:0.0001997:1:1000Genomes|T:0.0001562:1:1000Genomes_30X|T:0.0000084:1:ExAC|T:0.0000064:7:GnomAD_exomes|T:0.0000871:13:GnomAD_genomes|T:0.0001133:30:TOPMED|T:0.:0:ALFA
21	31661262	A>G	snv	572454656		by-frequency;by-alfa;by-cluster	intron_variant	SOD1	G:0.000399:2:1000Genomes|G:0.000259:1:ALSPAC|G:0.000877:131:GnomAD_genomes|G:0.001054:279:TOPMED|G:0.:0:TWINSUK|G:0.000356:5:ALFA
21	31666938	A>G	snv	573071252		by-frequency;by-alfa;by-cluster	intron_variant	SOD1	G:0.0002:1:1000Genomes|G:0.000156:1:1000Genomes_30X|G:0.000007:1:GnomAD_genomes|G:0.:0:ALFA
21	31665466	C>T	snv	573230165		by-frequency;by-cluster	intron_variant	SOD1	T:0.000799:4:1000Genomes|T:0.000156:1:1000Genomes_30X|T:0.000007:1:GnomAD_genomes
21	31665013	G>A,C	snv	573237802		by-frequency;by-alfa;by-cluster	intron_variant	SOD1	C:0.0002:1:1000Genomes|C:0.000156:1:1000Genomes_30X|C:0.00002:3:GnomAD_genomes|G:0.5:1:SGDP_PRJ|C:0.:0:ALFA
21	31665549	G>T	snv	573620397		by-frequency;by-alfa;by-cluster	intron_variant	SOD1	T:0.000074:11:GnomAD_genomes|T:0.002004:2:GoNL|T:0.000038:10:TOPMED|T:0.:0:ALFA
21	31667029	G>A,T	snv	573641876		by-frequency;by-cluster	intron_variant	SOD1	T:0.0002:1:1000Genomes|T:0.000156:1:1000Genomes_30X|T:0.000002:1:GnomAD_exomes|A:0.000013:1:TOMMO
21	31666200	C>T	snv	573779554		by-frequency;by-alfa;by-cluster	intron_variant	SOD1	T:0.000799:4:1000Genomes|T:0.000937:6:1000Genomes_30X|T:0.000067:10:GnomAD_genomes|T:0.000076:20:TOPMED|T:0.:0:ALFA
21	31665558	G>A	snv	573817953		by-frequency;by-alfa;by-cluster	intron_variant	SOD1	A:0.0002:1:1000Genomes|A:0.000156:1:1000Genomes_30X|A:0.000663:99:GnomAD_genomes|A:0.00074:196:TOPMED|A:0.000427:6:ALFA
21	31667539	A>T	snv	574008242		by-frequency;by-cluster	intron_variant	SOD1	T:0.0002:1:1000Genomes|T:0.000156:1:1000Genomes_30X|T:0.000007:1:GnomAD_genomes
21	31659208	C>T	snv	574033587		by-frequency;by-alfa;by-cluster	2KB_upstream_variant;upstream_transcript_variant	SOD1	T:0.002995:15:1000Genomes|T:0.003123:20:1000Genomes_30X|T:0.002774:414:GnomAD_genomes|T:0.00463:1:Qatari|C:0.5:3:SGDP_PRJ|T:0.003087:817:TOPMED|T:0.002011:29:ALFA
21	31662610	T>C	snv	574138589		by-frequency;by-cluster	intron_variant;upstream_transcript_variant;2KB_upstream_variant	SOD1;LOC124900469	T:0.5:1:SGDP_PRJ
21	31659371	A>C	snv	574224873		by-frequency;by-alfa;by-cluster	2KB_upstream_variant;upstream_transcript_variant	SOD1	C:0.00001:1:GnomAD_exomes|C:0.000047:7:GnomAD_genomes|C:0.000042:11:TOPMED|C:0.:0:ALFA
21	31664768	G>A	snv	575021201		by-frequency;by-alfa;by-cluster	downstream_transcript_variant;intron_variant;500B_downstream_variant	SOD1;LOC124900469	A:0.0002:1:1000Genomes|A:0.000156:1:1000Genomes_30X|A:0.000013:2:GnomAD_genomes|A:0.000491:38:TOMMO|A:0.:0:ALFA
21	31664548	C>A,G,T	snv	575424588		by-frequency;by-alfa;by-cluster	downstream_transcript_variant;intron_variant;500B_downstream_variant	SOD1;LOC124900469	G:0.0002:1:1000Genomes|G:0.00016:1:1000Genomes_30X|T:0.00014:1:Korea4K|G:0.:0:ALFA
21	31664224	C>T	snv	575748552		by-frequency;by-alfa;by-cluster	intron_variant;upstream_transcript_variant;2KB_upstream_variant	SOD1;LOC124900469	T:0.0002:1:1000Genomes|T:0.000156:1:1000Genomes_30X|T:0.00003:5:GnomAD_exomes|T:0.000007:1:GnomAD_genomes|T:0.000013:1:TOMMO|T:0.000011:3:TOPMED|T:0.:0:ALFA
21	31662334	CTTCA>-	delins	576030849		by-frequency;by-alfa;by-cluster	intron_variant;upstream_transcript_variant;2KB_upstream_variant	SOD1;LOC124900469	-:0.002196:11:1000Genomes|-:0.002498:16:1000Genomes_30X|-:0.000259:1:ALSPAC|-:0.000223:1:Estonian|-:0.000951:142:GnomAD_genomes|-:0.000499:132:TOPMED|-:0.00027:1:TWINSUK|A:0.000864:16:ALFA
21	31663114	G>A	snv	576134395		by-frequency;by-alfa;by-cluster	intron_variant;upstream_transcript_variant;2KB_upstream_variant	SOD1;LOC124900469	A:0.000007:1:GnomAD_genomes|A:0.001002:1:GoNL|A:0.:0:ALFA
21	31668775	A>C	snv	576189393		by-frequency;by-alfa;by-cluster	3_prime_UTR_variant	SOD1	C:0.000399:2:1000Genomes|C:0.000312:2:1000Genomes_30X|C:0.000015:6:GnomAD_exomes|C:0.00002:3:GnomAD_genomes|C:0.000008:2:TOPMED|C:0.000071:1:ALFA
21	31657863	G>A	snv	576495773		by-frequency;by-alfa;by-cluster	2KB_upstream_variant;upstream_transcript_variant	SOD1	A:0.0002:1:1000Genomes|A:0.000156:1:1000Genomes_30X|A:0.000007:1:GnomAD_genomes|A:0.000008:2:TOPMED|A:0.:0:ALFA
21	31668925	A>C,G,T	snv	577484556		by-frequency;by-alfa;by-cluster	3_prime_UTR_variant	SOD1	C:0.0002:1:1000Genomes|C:0.000156:1:1000Genomes_30X|G:0.000009:1:GnomAD_exomes|G:0.000004:1:TOPMED|G:0.:0:ALFA
21	31668154	G>A,C	snv	577604275		by-frequency;by-alfa;by-cluster	intron_variant	SOD1	A:0.000799:4:1000Genomes|A:0.000625:4:1000Genomes_30X|A:0.000442:117:TOPMED|A:0.000356:5:ALFA
21	31667606	A>G	snv	577643519		by-frequency;by-alfa;by-cluster	intron_variant	SOD1	G:0.000399:2:1000Genomes|G:0.000312:2:1000Genomes_30X|G:0.000027:4:GnomAD_genomes|G:0.000049:13:TOPMED|G:0.:0:ALFA
21	31660521	A>G	snv	577679775		by-frequency;by-alfa;by-cluster	intron_variant	SOD1	G:0.0002:1:1000Genomes|G:0.000156:1:1000Genomes_30X|G:0.000007:1:GnomAD_genomes|G:0.:0:ALFA
21	31665722	T>C	snv	577707444		by-frequency;by-alfa;by-cluster	intron_variant	SOD1	C:0.000007:1:GnomAD_genomes|C:0.001002:1:GoNL|C:0.000019:5:TOPMED|C:0.000071:1:ALFA
21	31661471	C>G	snv	577751082		by-frequency;by-alfa;by-cluster	intron_variant	SOD1	G:0.0002:1:1000Genomes|G:0.000156:1:1000Genomes_30X|G:0.000259:1:ALSPAC|G:0.001563:7:Estonian|G:0.000549:82:GnomAD_genomes|G:0.003333:2:NorthernSweden|G:0.000468:124:TOPMED|G:0.00027:1:TWINSUK|G:0.000635:12:ALFA
21	31662478	G>A,C,T	snv	577972406		by-frequency;by-alfa;by-cluster	intron_variant;upstream_transcript_variant;2KB_upstream_variant	SOD1;LOC124900469	T:0.00339:17:1000Genomes|T:0.00281:18:1000Genomes_30X|C:0.:0:ALFA
21	31664068	C>T	snv	578251080		by-frequency;by-alfa;by-cluster	intron_variant;upstream_transcript_variant;2KB_upstream_variant	SOD1;LOC124900469	T:0.000013:2:GnomAD_genomes|C:0.5:1:SGDP_PRJ|T:0.000008:2:TOPMED|T:0.:0:ALFA
21	31667229	T>C	snv	745445038		by-frequency;by-alfa;by-cluster	intron_variant	SOD1	C:0.0000176:2:ExAC|C:0.0000008:1:GnomAD_exomes|C:0.0000134:2:GnomAD_genomes|C:0.0000076:2:TOPMED|C:0.:0:ALFA
21	31657978	T>G	snv	745471732		by-frequency;by-alfa;by-cluster	2KB_upstream_variant;upstream_transcript_variant	SOD1	G:0.:0:ALSPAC|G:0.000027:4:GnomAD_genomes|G:0.000004:1:TOPMED|G:0.00027:1:TWINSUK|G:0.:0:ALFA
21	31659747	A>G	snv	746051985		by-frequency;by-alfa;by-cluster	5_prime_UTR_variant	SOD1	G:0.000008:1:ExAC|G:0.000003:2:GnomAD_exomes|G:0.00002:3:GnomAD_genomes|G:0.000038:10:TOPMED|G:0.:0:ALFA
21	31662796	C>T	snv	746113509		by-frequency;by-cluster	intron_variant;upstream_transcript_variant;2KB_upstream_variant	SOD1;LOC124900469	T:0.:0:ALSPAC|T:0.000007:1:GnomAD_genomes|T:0.00027:1:TWINSUK
21	31666432	C>-	del	746180078		by-frequency	intron_variant	SOD1	-:0.00001:1:ExAC
21	31659254	ACAA>-	delins	746365096		by-frequency;by-alfa;by-cluster	2KB_upstream_variant;upstream_transcript_variant	SOD1	-:0.000259:1:ALSPAC|-:0.000094:14:GnomAD_genomes|-:0.000132:35:TOPMED|-:0.:0:TWINSUK|AA:0.000142:2:ALFA
21	31668543	C>A,G,T	snv	746397967		by-frequency;by-alfa;by-cluster	coding_sequence_variant;missense_variant	SOD1	G:0.000008:1:ExAC|T:0.000008:2:TOPMED|T:0.000037:1:ALFA
21	31665027	A>G	snv	746855409		by-frequency;by-alfa;by-cluster	intron_variant	SOD1	G:0.000013:2:GnomAD_genomes|G:0.000011:3:TOPMED|G:0.:0:ALFA
21	31668351	C>G,T	snv	747179010		by-frequency;by-alfa;by-cluster	intron_variant	SOD1	T:0.000259:1:ALSPAC|T:0.000034:5:GnomAD_genomes|T:0.000023:6:TOPMED|T:0.:0:TWINSUK|T:0.000071:1:ALFA
21	31663794	G>A,C	snv	747214897		by-frequency;by-cluster	2KB_upstream_variant;coding_sequence_variant;upstream_transcript_variant;missense_variant	SOD1;LOC124900469	A:0.:0:GnomAD_exomes
21	31662648	T>G	snv	747466131		by-frequency;by-alfa;by-cluster	intron_variant;upstream_transcript_variant;2KB_upstream_variant	SOD1;LOC124900469	G:0.:0:ALSPAC|G:0.000013:2:GnomAD_genomes|G:0.000008:2:TOPMED|G:0.00027:1:TWINSUK|G:0.:0:ALFA
21	31668732	G>T	snv	747886198		by-frequency;by-alfa;by-cluster	3_prime_UTR_variant	SOD1	T:0.:0:ALSPAC|T:0.00001:5:GnomAD_exomes|T:0.000019:5:TOPMED|T:0.00027:1:TWINSUK|T:0.000071:1:ALFA
21	31663807	G>A	snv	748040402		by-frequency;by-cluster	synonymous_variant;2KB_upstream_variant;coding_sequence_variant;upstream_transcript_variant	SOD1;LOC124900469	A:0.0000165:2:ExAC|A:0.0000179:25:GnomAD_exomes
21	31661215	T>C	snv	748845258		by-frequency;by-alfa;by-cluster	intron_variant	SOD1	C:0.000259:1:ALSPAC|C:0.00002:3:GnomAD_genomes|C:0.000008:2:TOPMED|C:0.00027:1:TWINSUK|C:0.000071:1:ALFA
21	31663856	C>G,T	snv	748897491		by-frequency;by-cluster	2KB_upstream_variant;coding_sequence_variant;upstream_transcript_variant;missense_variant	SOD1;LOC124900469	T:0.000008:1:ExAC
21	31668599	T>C,G	snv	749198316		by-frequency;by-cluster	3_prime_UTR_variant	SOD1	C:0.:0:ALSPAC|G:0.00001:1:TOMMO|C:0.00027:1:TWINSUK
21	31659737	C>G,T	snv	749428274		by-frequency;by-alfa;by-cluster	5_prime_UTR_variant	SOD1	T:0.000017:2:ExAC|G:0.000007:1:GnomAD_genomes|G:0.:0:ALFA
21	31667393	G>T	snv	749737196		by-frequency;by-cluster	intron_variant	SOD1	T:0.0000082:1:ExAC|T:0.0000008:1:GnomAD_exomes
21	31667282	G>T	snv	749831011		by-frequency;by-alfa;by-cluster	synonymous_variant;coding_sequence_variant	SOD1	T:0.000008:1:ExAC|T:0.000002:1:GnomAD_exomes|T:0.000007:1:GnomAD_genomes|T:0.000008:2:TOPMED|T:0.:0:ALFA
21	31669391	G>A,T	snv	750244932		by-frequency;by-alfa;by-cluster	downstream_transcript_variant;500B_downstream_variant	SOD1	T:0.000223:1:Estonian|T:0.000007:1:GnomAD_genomes|T:0.000224:1:ALFA
21	31662036	A>C	snv	750341877		by-frequency;by-alfa;by-cluster	intron_variant	SOD1	C:0.:0:ALSPAC|C:0.000054:8:GnomAD_genomes|C:0.000057:15:TOPMED|C:0.00027:1:TWINSUK|C:0.000214:3:ALFA
21	31668468	C>T	snv	750394840		by-frequency;by-cluster	intron_variant	SOD1	T:0.0000083:1:ExAC|T:0.0000014:2:GnomAD_exomes
21	31659028	G>A	snv	750706292		by-frequency;by-alfa;by-cluster	2KB_upstream_variant;upstream_transcript_variant	SOD1	A:0.:0:ALSPAC|A:0.000007:1:GnomAD_genomes|A:0.000015:4:TOPMED|A:0.00027:1:TWINSUK|A:0.000071:1:ALFA
21	31663121	CTTTT>-	delins	750837385		by-frequency;by-alfa;by-cluster	intron_variant;upstream_transcript_variant;2KB_upstream_variant	SOD1;LOC124900469	-:0.000103:12:GnomAD_genomes|-:0.015677:113:Korea4K|-:0.000143:11:TOMMO|-:0.000147:39:TOPMED|TTTT:0.:0:ALFA
21	31663935	A>C,G	snv	750860939		by-frequency;by-cluster	intron_variant;upstream_transcript_variant;2KB_upstream_variant	SOD1;LOC124900469	C:0.000008:1:ExAC
21	31665421	G>A	snv	750897282		by-frequency;by-cluster	intron_variant	SOD1	A:0.0003:1:ALSPAC|A:0.:0:TWINSUK
21	31665348	A>G	snv	751170536		by-frequency;by-alfa;by-cluster	intron_variant	SOD1	G:0.000519:2:ALSPAC|G:0.00006:9:GnomAD_genomes|G:0.000038:10:TOPMED|G:0.:0:TWINSUK|G:0.000142:2:ALFA
21	31666424	TTT>-,TT,TTTT	delins	751210559		by-frequency;by-alfa;by-cluster	intron_variant	SOD1	-:0.00022:1:Estonian|TTTTTTTTT:0.:0:ALFA
21	31660854	A>G	snv	751543575		by-frequency;by-alfa;by-cluster	intron_variant	SOD1	G:0.:0:ALSPAC|G:0.000013:2:GnomAD_genomes|G:0.000011:3:TOPMED|G:0.00027:1:TWINSUK|G:0.:0:ALFA
21	31667423	T>A	snv	751861175		by-frequency	intron_variant	SOD1	A:0.002:1:MGP
21	31666415	T>C	snv	751865612		by-frequency;by-cluster	intron_variant	SOD1	C:0.000013:1:ExAC|C:0.000002:1:GnomAD_exomes|C:0.000138:1:Korea4K
21	31668744	C>T	snv	752244824		by-cluster	3_prime_UTR_variant	SOD1
21	31668101	C>T	snv	752867459		by-frequency;by-cluster	intron_variant	SOD1	T:0.:0:ALSPAC|T:0.0003:1:TWINSUK
21	31662405	C>T	snv	753534442		by-frequency;by-alfa;by-cluster	intron_variant;upstream_transcript_variant;2KB_upstream_variant	SOD1;LOC124900469	T:0.:0:ALSPAC|T:0.000007:1:GnomAD_genomes|T:0.000004:1:TOPMED|T:0.00027:1:TWINSUK|T:0.000071:1:ALFA
21	31666569	A>C	snv	753778444		by-frequency;by-cluster	intron_variant	SOD1	C:0.0000105:1:ExAC|C:0.0000009:1:GnomAD_exomes
21	31659423	G>A,C,T	snv	754028314		by-frequency;by-alfa;by-cluster	2KB_upstream_variant;upstream_transcript_variant	SOD1	A:0.000259:1:ALSPAC|A:0.000017:4:GnomAD_exomes|A:0.:0:TWINSUK|T:0.:0:ALFA
21	31664732	TCAGCCCC>-	delins	754047065		by-frequency;by-alfa;by-cluster	downstream_transcript_variant;intron_variant;500B_downstream_variant	SOD1;LOC124900469	-:0.001038:4:ALSPAC|-:0.000223:1:Estonian|-:0.000268:40:GnomAD_genomes|-:0.000249:66:TOPMED|-:0.001079:4:TWINSUK|CC:0.00027:5:ALFA
21	31666863	G>C,T	snv	754269930		by-frequency;by-alfa;by-cluster	intron_variant	SOD1	T:0.000259:1:ALSPAC|C:0.000007:1:GnomAD_genomes|C:0.000008:2:TOPMED|T:0.:0:TWINSUK|C:0.:0:ALFA
21	31663760	A>G	snv	754332268		by-frequency;by-cluster	intron_variant;upstream_transcript_variant;2KB_upstream_variant	SOD1;LOC124900469	G:0.0000082:1:ExAC|G:0.0000023:3:GnomAD_exomes
21	31663441	A>G	snv	754349242		by-cluster	intron_variant;upstream_transcript_variant;2KB_upstream_variant	SOD1;LOC124900469
21	31662481	T>G	snv	754530597		by-frequency;by-alfa;by-cluster	intron_variant;upstream_transcript_variant;2KB_upstream_variant	SOD1;LOC124900469	G:0.000259:1:ALSPAC|G:0.000223:1:Estonian|G:0.000013:2:GnomAD_genomes|G:0.000011:3:TOPMED|G:0.:0:TWINSUK|G:0.000108:2:ALFA
21	31667379	A>C,G,T	snv	754532533		by-frequency;by-alfa;by-cluster	intron_variant	SOD1	G:0.000008:1:ExAC|C:0.:0:ALFA
21	31659501	G>A,C	snv	755007630		by-frequency;by-cluster	2KB_upstream_variant;upstream_transcript_variant	SOD1	A:0.00026:1:ALSPAC|A:0.00001:1:TOMMO|A:0.:0:TWINSUK
21	31659728	T>A,C,G	snv	755349211		by-frequency;by-alfa;by-cluster	5_prime_UTR_variant	SOD1	C:0.000008:1:ExAC|A:0.000004:1:TOPMED|C:0.:0:ALFA
21	31666442	T>C	snv	755858208		by-frequency;by-cluster	intron_variant	SOD1	C:0.0000099:1:ExAC|C:0.0000022:3:GnomAD_exomes
21	31661125	A>G	snv	755876052		by-frequency;by-alfa;by-cluster	intron_variant	SOD1	G:0.:0:ALSPAC|G:0.000007:1:GnomAD_genomes|G:0.000011:3:TOPMED|G:0.00027:1:TWINSUK|G:0.:0:ALFA
21	31662188	G>A	snv	755925129		by-frequency;by-alfa;by-cluster	intron_variant	SOD1	A:0.000259:1:ALSPAC|A:0.000013:2:GnomAD_genomes|A:0.000008:2:TOPMED|A:0.:0:TWINSUK|A:0.:0:ALFA
21	31665451	C>T	snv	756466159		by-frequency;by-alfa;by-cluster	intron_variant	SOD1	T:0.000259:1:ALSPAC|T:0.000047:7:GnomAD_genomes|T:0.000049:13:TOPMED|T:0.:0:TWINSUK|T:0.000071:1:ALFA
21	31665352	T>G	snv	756800003		by-frequency;by-cluster	intron_variant	SOD1	G:0.000259:1:ALSPAC|G:0.000007:1:GnomAD_genomes|G:0.:0:TWINSUK
21	31667687	C>G,T	snv	757073448		by-frequency;by-alfa;by-cluster	intron_variant	SOD1	G:0.000223:1:Estonian|G:0.000094:14:GnomAD_genomes|G:0.000054:1:ALFA
21	31660899	G>A,C,T	snv	757087043		by-frequency;by-alfa;by-cluster	intron_variant	SOD1	C:0.:0:ALSPAC|C:0.000013:2:GnomAD_genomes|T:0.000013:1:TOMMO|C:0.000023:6:TOPMED|C:0.00027:1:TWINSUK|C:0.:0:ALFA
21	31659573	C>T	snv	757094746		by-frequency;by-alfa;by-cluster	2KB_upstream_variant;upstream_transcript_variant	SOD1	T:0.:0:ALSPAC|T:0.000007:3:GnomAD_exomes|T:0.000007:1:GnomAD_genomes|T:0.000011:3:TOPMED|T:0.00027:1:TWINSUK|T:0.:0:ALFA
21	31666570	T>C	snv	757128124		by-frequency;by-alfa;by-cluster	intron_variant	SOD1	C:0.:0:ExAC|C:0.000013:2:GnomAD_genomes|C:0.:0:ALFA
21	31668454	C>G,T	snv	757264622		by-frequency;by-alfa;by-cluster	intron_variant	SOD1	T:0.0002595:1:ALSPAC|G:0.0002232:1:Estonian|T:0.0000036:5:GnomAD_exomes|T:0.0000038:1:TOPMED|T:0.:0:TWINSUK|G:0.000066:1:ALFA
21	31659855	C>G,T	snv	757303817		by-frequency;by-alfa;by-cluster	intron_variant	SOD1	T:0.0000084:1:ExAC|T:0.0000007:1:GnomAD_exomes|T:0.0000227:6:TOPMED|T:0.:0:ALFA
21	31663764	T>C	snv	757712477		by-frequency;by-cluster	intron_variant;upstream_transcript_variant;2KB_upstream_variant	SOD1;LOC124900469	C:0.0000082:1:ExAC|C:0.000012:16:GnomAD_exomes
21	31664144	G>A,T	snv	757778694		by-frequency;by-alfa;by-cluster	intron_variant;upstream_transcript_variant;2KB_upstream_variant	SOD1;LOC124900469	T:0.:0:ALSPAC|T:0.00027:1:TWINSUK|T:0.:0:ALFA
21	31667235	A>G,T	snv	757813929		by-frequency;by-alfa;by-cluster	intron_variant	SOD1	G:0.000009:1:ExAC|T:0.000003:2:GnomAD_exomes|G:0.000013:2:GnomAD_genomes|G:0.00003:8:TOPMED|G:0.000071:1:ALFA
21	31664014	C>T	snv	757999733		by-frequency;by-alfa;by-cluster	intron_variant;upstream_transcript_variant;2KB_upstream_variant	SOD1;LOC124900469	T:0.:0:ALSPAC|T:0.000045:24:GnomAD_exomes|T:0.000007:1:GnomAD_genomes|T:0.00003:8:TOPMED|T:0.000539:2:TWINSUK|T:0.:0:ALFA
21	31668476	T>C	snv	758204711		by-frequency;by-alfa;by-cluster	synonymous_variant;coding_sequence_variant	SOD1	C:0.0000247:3:ExAC|C:0.0000128:18:GnomAD_exomes|C:0.0006845:2:KOREAN|C:0.0002765:2:Korea4K|C:0.0003101:24:TOMMO|C:0.0000038:1:TOPMED|C:0.:0:ALFA
21	31667036	A>G	snv	758434127		by-frequency;by-cluster	intron_variant	SOD1	G:0.:0:ALSPAC|G:0.000005:2:GnomAD_exomes|G:0.00027:1:TWINSUK
21	31659868	G>A	snv	758586158		by-frequency;by-cluster	intron_variant	SOD1	A:0.000008:1:ExAC|A:0.000002:1:GnomAD_exomes
21	31663869	T>G	snv	759149157		by-frequency;by-cluster	2KB_upstream_variant;coding_sequence_variant;upstream_transcript_variant;missense_variant	SOD1;LOC124900469	G:0.000008:1:ExAC|G:0.000008:5:GnomAD_exomes
21	31668616	CT>-	delins	759276021		by-frequency;by-cluster	3_prime_UTR_variant	SOD1	-:0.0000083:1:ExAC|-:0.0000009:1:GnomAD_exomes
21	31663703	T>A,C	snv	759369158		by-frequency;by-alfa;by-cluster	intron_variant;upstream_transcript_variant;2KB_upstream_variant	SOD1;LOC124900469	A:0.000259:1:ALSPAC|A:0.000011:10:GnomAD_exomes|A:0.:0:TWINSUK|C:0.:0:ALFA
21	31659882	->C	delins	759472397		by-frequency;by-alfa;by-cluster	intron_variant	SOD1	C:0.000017:2:ExAC|C:0.000002:1:GnomAD_exomes|C:0.000008:2:TOPMED|CCCC:0.:0:ALFA
21	31666131	C>A	snv	759473397		by-frequency;by-cluster	intron_variant	SOD1	A:0.0003:1:ALSPAC|A:0.:0:TWINSUK
21	31661698	T>A	snv	759635051		by-frequency;by-alfa;by-cluster	intron_variant	SOD1	A:0.:0:ALSPAC|A:0.000007:1:GnomAD_genomes|A:0.000004:1:TOPMED|A:0.00027:1:TWINSUK|A:0.:0:ALFA
21	31666550	C>A,T	snv	759675335		by-frequency;by-alfa;by-cluster	intron_variant	SOD1	T:0.000023:6:TOPMED|T:0.:0:ALFA
21	31660817	A>G	snv	759706251		by-frequency;by-cluster	intron_variant	SOD1	G:0.:0:ALSPAC|G:0.0003:1:TWINSUK
21	31667297	T>C	snv	759731506		by-frequency;by-cluster	synonymous_variant;coding_sequence_variant	SOD1	C:0.0000165:2:ExAC|C:0.0000014:2:GnomAD_exomes
21	31669268	A>C,G	snv	759964953		by-frequency;by-alfa;by-cluster	downstream_transcript_variant;500B_downstream_variant	SOD1	G:0.000259:1:ALSPAC|G:0.000034:5:GnomAD_genomes|G:0.000138:1:Korea4K|G:0.000042:11:TOPMED|G:0.:0:TWINSUK|G:0.000071:1:ALFA
21	31666692	C>A	snv	759990744		by-cluster	intron_variant	SOD1
21	31667725	G>T	snv	760101400		by-frequency;by-cluster	intron_variant	SOD1	T:0.0003:1:ALSPAC|T:0.:0:TWINSUK
21	31667316	A>G	snv	760740095		by-frequency;by-alfa;by-cluster	coding_sequence_variant;missense_variant	SOD1	G:0.0000082:1:ExAC|G:0.0000093:13:GnomAD_exomes|G:0.0000129:1:TOMMO|G:0.0000151:4:TOPMED|G:0.0000268:1:ALFA
21	31668443	A>G	snv	760794337		by-frequency;by-cluster	intron_variant	SOD1	G:0.000008:1:ExAC|G:0.000017:10:GnomAD_exomes
21	31667348	C>A,G	snv	761014216		by-frequency;by-cluster	coding_sequence_variant;missense_variant	SOD1	G:0.000001:1:GnomAD_exomes|G:0.000684:2:KOREAN|A:0.000026:2:TOMMO
21	31663748	C>G,T	snv	761076700		by-frequency;by-alfa;by-cluster	intron_variant;upstream_transcript_variant;2KB_upstream_variant	SOD1;LOC124900469	T:0.0000082:1:ExAC|T:0.0000008:1:GnomAD_exomes|T:0.0000067:1:GnomAD_genomes|G:0.0000129:1:TOMMO|T:0.0000038:1:TOPMED|T:0.:0:ALFA
21	31666423	C>A,G,T	snv	761253363		by-frequency;by-cluster	intron_variant	SOD1	T:0.:0:ALSPAC|T:0.00001:1:ExAC|T:0.00027:1:TWINSUK
21	31667647	T>G	snv	761465894		by-frequency;by-alfa;by-cluster	intron_variant	SOD1	G:0.000259:1:ALSPAC|G:0.000013:2:GnomAD_genomes|G:0.000011:3:TOPMED|G:0.00027:1:TWINSUK|G:0.:0:ALFA
21	31668452	T>A,C	snv	761642958		by-frequency;by-alfa;by-cluster	intron_variant	SOD1	A:0.000008:1:ExAC|A:0.:0:ALFA
21	31663118	->C	delins	761676401		by-frequency;by-cluster	intron_variant;upstream_transcript_variant;2KB_upstream_variant	SOD1;LOC124900469	C:0.:0:ALSPAC|C:0.0003:1:TWINSUK
21	31663118	ACTTTT>-	del	761975109			intron_variant;upstream_transcript_variant;2KB_upstream_variant	SOD1;LOC124900469
21	31663915	T>C	snv	762067021		by-frequency;by-cluster	intron_variant;upstream_transcript_variant;2KB_upstream_variant	SOD1;LOC124900469	C:0.000008:1:ExAC
21	31668594	->TTA	ins	762090620		by-frequency	3_prime_UTR_variant	SOD1	TTA:0.000017:2:ExAC
21	31668793	A>G	snv	762299921		by-frequency;by-alfa;by-cluster	3_prime_UTR_variant	SOD1	G:0.000066:24:GnomAD_exomes|G:0.000013:2:GnomAD_genomes|G:0.000011:3:TOPMED|G:0.:0:ALFA
21	31658406	A>G	snv	762440754		by-frequency;by-alfa;by-cluster	2KB_upstream_variant;upstream_transcript_variant	SOD1	G:0.:0:ALSPAC|G:0.000223:1:Estonian|G:0.000201:30:GnomAD_genomes|G:0.000166:44:TOPMED|G:0.00027:1:TWINSUK|G:0.000265:5:ALFA
21	31665296	C>G	snv	762624965		by-frequency;by-alfa;by-cluster	intron_variant	SOD1	G:0.000259:1:ALSPAC|G:0.000013:2:GnomAD_genomes|G:0.000015:4:TOPMED|G:0.:0:TWINSUK|G:0.:0:ALFA
21	31668595	A>C,G	snv	762799893		by-frequency;by-cluster	3_prime_UTR_variant	SOD1	G:0.000008:1:ExAC
21	31666278	A>G	snv	762826313		by-frequency;by-alfa;by-cluster	intron_variant	SOD1	G:0.000259:1:ALSPAC|G:0.000013:2:GnomAD_genomes|G:0.000011:3:TOPMED|G:0.:0:TWINSUK|G:0.:0:ALFA
21	31661882	C>A,T	snv	763086636		by-frequency;by-cluster	intron_variant	SOD1	T:0.0003:1:ALSPAC|T:0.:0:TWINSUK
21	31663936	T>A,C	snv	763177154		by-frequency;by-alfa;by-cluster	intron_variant;upstream_transcript_variant;2KB_upstream_variant	SOD1;LOC124900469	A:0.000042:5:ExAC|C:0.:0:ALFA
21	31662289	A>G,T	snv	763189202		by-frequency;by-alfa;by-cluster	intron_variant	SOD1	T:0.:0:ALFA
21	31659191	G>C	snv	763243276		by-cluster	2KB_upstream_variant;upstream_transcript_variant	SOD1
21	31666532	T>A,C	snv	763518381		by-frequency;by-alfa;by-cluster	intron_variant	SOD1	A:0.000009:1:ExAC|C:0.000007:1:GnomAD_genomes|C:0.000004:1:TOPMED|C:0.:0:ALFA
21	31659724	C>A,G,T	snv	763699755		by-frequency;by-alfa;by-cluster	5_prime_UTR_variant	SOD1	A:0.000034:5:GnomAD_genomes|A:0.000049:13:TOPMED|T:0.:0:ALFA
21	31665345	T>C,G	snv	763707947		by-frequency;by-alfa;by-cluster	intron_variant	SOD1	G:0.:0:ALSPAC|G:0.00027:1:TWINSUK|G:0.:0:ALFA
21	31663507	C>A,T	snv	764111614		by-frequency;by-alfa;by-cluster	intron_variant;upstream_transcript_variant;2KB_upstream_variant	SOD1;LOC124900469	A:0.:0:ALSPAC|A:0.000007:1:GnomAD_genomes|A:0.00027:1:TWINSUK|T:0.:0:ALFA
21	31668449	A>G	snv	764285938		by-frequency;by-cluster	intron_variant	SOD1	G:0.0000083:1:ExAC|G:0.0000029:4:GnomAD_exomes
21	31663756	A>G	snv	764392882		by-frequency;by-cluster	intron_variant;upstream_transcript_variant;2KB_upstream_variant	SOD1;LOC124900469	G:0.0000082:1:ExAC|G:0.0000031:4:GnomAD_exomes
21	31659850	T>C	snv	764625461		by-frequency;by-cluster	intron_variant	SOD1	C:0.0000084:1:ExAC|C:0.0000093:13:GnomAD_exomes
21	31663739	A>C	snv	764837116		by-frequency;by-cluster	intron_variant;upstream_transcript_variant;2KB_upstream_variant	SOD1;LOC124900469	C:0.:0:ALSPAC|C:0.0000082:1:ExAC|C:0.0000077:9:GnomAD_exomes|C:0.0002697:1:TWINSUK
21	31667181	G>A,T	snv	764888472		by-frequency;by-alfa;by-cluster	intron_variant	SOD1	A:0.000001:1:GnomAD_exomes|T:0.000007:1:GnomAD_genomes|A:0.001873:1:MGP|T:0.000008:2:TOPMED|T:0.:0:ALFA
21	31665177	A>G,T	snv	765032620		by-frequency;by-alfa;by-cluster	intron_variant	SOD1	T:0.000259:1:ALSPAC|T:0.000007:1:GnomAD_genomes|T:0.000194:15:TOMMO|T:0.000015:4:TOPMED|T:0.:0:TWINSUK|T:0.000094:1:ALFA
21	31659892	C>-,CC	delins	765098981		by-frequency;by-alfa;by-cluster	intron_variant	SOD1	-:0.000468:3:1000Genomes_30X|-:0.000285:33:ExAC|-:0.000262:39:GnomAD_genomes|-:0.00016:2:GoESP|-:0.000268:71:TOPMED|CCCCC:0.00013:3:ALFA
21	31660847	G>C	snv	765177291		by-frequency;by-alfa;by-cluster	intron_variant	SOD1	C:0.:0:ALSPAC|C:0.000007:1:GnomAD_genomes|C:0.000004:1:TOPMED|C:0.00027:1:TWINSUK|C:0.:0:ALFA
21	31663766	T>C	snv	765242312		by-frequency;by-cluster	intron_variant;upstream_transcript_variant;2KB_upstream_variant	SOD1;LOC124900469	C:0.0000165:2:ExAC|C:0.0000045:6:GnomAD_exomes
21	31665852	ATA>-	delins	765272445		by-frequency;by-alfa;by-cluster	intron_variant	SOD1	-:0.:0:ALSPAC|-:0.000013:2:GnomAD_genomes|-:0.000023:6:TOPMED|-:0.00027:1:TWINSUK|TAATA:0.:0:ALFA
21	31659014	C>T	snv	765366223		by-frequency;by-cluster	2KB_upstream_variant;upstream_transcript_variant	SOD1	T:0.00003:2:TOMMO
21	31669307	C>A,T	snv	765598306		by-frequency;by-alfa;by-cluster	downstream_transcript_variant;500B_downstream_variant	SOD1	T:0.000259:1:ALSPAC|T:0.00008:12:GnomAD_genomes|T:0.00027:1:TWINSUK|T:0.:0:ALFA
21	31663934	G>C	snv	765836386		by-frequency;by-cluster	intron_variant;upstream_transcript_variant;2KB_upstream_variant	SOD1;LOC124900469	C:0.0000166:2:ExAC|C:0.0000025:3:GnomAD_exomes
21	31668491	C>T	snv	765931024		by-frequency;by-alfa;by-cluster	synonymous_variant;coding_sequence_variant	SOD1	T:0.0000082:1:ExAC|T:0.0000029:4:GnomAD_exomes|T:0.0000067:1:GnomAD_genomes|T:0.0000038:1:TOPMED|T:0.:0:ALFA
21	31663742	T>A,C	snv	766078896		by-frequency;by-alfa;by-cluster	intron_variant;upstream_transcript_variant;2KB_upstream_variant	SOD1;LOC124900469	C:0.000016:2:ExAC|C:0.:0:ALFA
21	31663126	TTTTTT>-,T,TTT,TTTT,TTTTT,TTTTTTT,TTTTTTTT	delins	766108641		by-frequency;by-alfa;by-cluster	intron_variant;upstream_transcript_variant;2KB_upstream_variant	SOD1;LOC124900469	-:0.055786:215:ALSPAC|T:0.038869:22:NorthernSweden|-:0.000008:2:TOPMED|-:0.052859:196:TWINSUK|TTTTTTTTTTTTTT:0.:0:ALFA
21	31668602	G>A	snv	766294613		by-frequency;by-alfa;by-cluster	3_prime_UTR_variant	SOD1	A:0.0000083:1:ExAC|A:0.0000979:129:GnomAD_exomes|A:0.0000335:5:GnomAD_genomes|A:0.0000416:11:TOPMED|A:0.0000712:1:ALFA
21	31666402	G>A	snv	766520850		by-frequency;by-cluster	intron_variant	SOD1	A:0.000013:1:ExAC|A:0.000005:3:GnomAD_exomes
21	31659291	T>A,G	snv	766578173		by-frequency;by-cluster	2KB_upstream_variant;upstream_transcript_variant	SOD1	A:0.00026:1:ALSPAC|G:0.00004:1:GnomAD_exomes|A:0.:0:TWINSUK
21	31666590	T>C	snv	766860898		by-frequency;by-alfa;by-cluster	intron_variant	SOD1	C:0.000259:1:ALSPAC|C:0.000013:12:GnomAD_exomes|C:0.000004:1:TOPMED|C:0.:0:TWINSUK|C:0.:0:ALFA
21	31663356	T>C	snv	766938597		by-cluster	intron_variant;upstream_transcript_variant;2KB_upstream_variant	SOD1;LOC124900469
21	31668627	G>A	snv	767088423		by-frequency;by-alfa;by-cluster	3_prime_UTR_variant	SOD1	A:0.0000084:1:ExAC|A:0.0000009:1:GnomAD_exomes|A:0.0000067:1:GnomAD_genomes|A:0.:0:ALFA
21	31661045	C>G,T	snv	767432996		by-frequency;by-alfa;by-cluster	intron_variant	SOD1	G:0.:0:ALSPAC|T:0.000004:1:TOPMED|G:0.00027:1:TWINSUK|T:0.:0:ALFA
21	31658881	G>A,C,T	snv	767726954		by-frequency;by-alfa;by-cluster	2KB_upstream_variant;upstream_transcript_variant	SOD1	A:0.000259:1:ALSPAC|A:0.000121:18:GnomAD_genomes|C:0.000138:1:Korea4K|A:0.000132:35:TOPMED|A:0.000809:3:TWINSUK|A:0.000069:1:ALFA
21	31668641	T>A	snv	768576216		by-frequency;by-cluster	3_prime_UTR_variant	SOD1	A:0.:0:ALSPAC|A:0.000007:7:GnomAD_exomes|A:0.00027:1:TWINSUK
21	31668577	A>C	snv	768697100		by-frequency;by-alfa;by-cluster	terminator_codon_variant;stop_lost	SOD1	C:0.0000082:1:ExAC|C:0.0000072:10:GnomAD_exomes|C:0.0000067:1:GnomAD_genomes|C:0.0000534:2:ALFA
21	31667419	CA>-	delins	768755222		by-frequency;by-alfa;by-cluster	intron_variant	SOD1	-:0.0000082:1:ExAC|-:0.0000028:3:GnomAD_exomes|-:0.0000067:1:GnomAD_genomes|-:0.0000076:2:TOPMED|A:0.:0:ALFA
21	31659755	G>A,C,T	snv	768768369		by-frequency;by-alfa;by-cluster	5_prime_UTR_variant	SOD1	C:0.000008:1:ExAC|T:0.000013:2:GnomAD_genomes|C:0.000181:14:TOMMO|T:0.000011:3:TOPMED|T:0.:0:ALFA
21	31658166	C>G,T	snv	769300533		by-frequency;by-cluster	2KB_upstream_variant;upstream_transcript_variant	SOD1	G:0.0003:1:ALSPAC|G:0.:0:TWINSUK
21	31666136	T>C	snv	769477105		by-frequency;by-cluster	intron_variant	SOD1	C:0.0005:2:ALSPAC|C:0.:0:TWINSUK
21	31666528	T>A,C	snv	770036508		by-frequency;by-cluster	intron_variant	SOD1	C:0.000009:1:ExAC
21	31664242	G>T	snv	770176708		by-frequency;by-alfa;by-cluster	intron_variant;upstream_transcript_variant;2KB_upstream_variant	SOD1;LOC124900469	T:0.:0:ALSPAC|T:0.000048:7:GnomAD_exomes|T:0.000027:4:GnomAD_genomes|T:0.00006:16:TOPMED|T:0.00027:1:TWINSUK|T:0.:0:ALFA
21	31668961	C>G	snv	770375921		by-frequency;by-alfa;by-cluster	downstream_transcript_variant;500B_downstream_variant	SOD1	G:0.000156:1:1000Genomes_30X|G:0.:0:ALSPAC|G:0.000179:13:GnomAD_exomes|G:0.000121:18:GnomAD_genomes|G:0.001667:1:NorthernSweden|C:0.5:1:SGDP_PRJ|G:0.000064:17:TOPMED|G:0.00027:1:TWINSUK|G:0.:0:ALFA
21	31663866	A>T	snv	770404622		by-frequency;by-cluster	2KB_upstream_variant;coding_sequence_variant;upstream_transcript_variant;missense_variant	SOD1;LOC124900469	T:0.000008:1:ExAC
21	31666480	T>C	snv	770457607		by-frequency;by-cluster	synonymous_variant;coding_sequence_variant	SOD1	C:0.000009:1:ExAC|C:0.000002:1:GnomAD_exomes
21	31665034	T>A	snv	770838557		by-frequency;by-alfa;by-cluster	intron_variant	SOD1	A:0.00026:1:ALSPAC|A:0.:0:TWINSUK|A:0.00007:1:ALFA
21	31659742	C>G	snv	771010834		by-frequency;by-cluster	5_prime_UTR_variant	SOD1	G:0.0000167:2:ExAC|G:0.0000036:5:GnomAD_exomes
21	31667410	T>A,G	snv	771393347		by-frequency;by-cluster	intron_variant	SOD1	G:0.000008:1:ExAC
21	31661597	C>A,T	snv	771395626		by-frequency;by-alfa;by-cluster	intron_variant	SOD1	T:0.:0:ALSPAC|T:0.00014:1:Korea4K|T:0.00027:1:TWINSUK|T:0.:0:ALFA
21	31658606	A>G	snv	771766654		by-frequency;by-alfa;by-cluster	2KB_upstream_variant;upstream_transcript_variant	SOD1	G:0.000074:11:GnomAD_genomes|G:0.000079:21:TOPMED|G:0.000142:2:ALFA
21	31668789	T>C	snv	771827992		by-frequency;by-alfa;by-cluster	3_prime_UTR_variant	SOD1	C:0.:0:ALSPAC|C:0.000046:17:GnomAD_exomes|C:0.000007:1:GnomAD_genomes|C:0.000019:5:TOPMED|C:0.00027:1:TWINSUK|C:0.:0:ALFA
21	31659720	G>A,C,T	snv	771875500		by-frequency;by-alfa;by-cluster	5_prime_UTR_variant	SOD1	T:0.000008:1:ExAC|C:0.:0:ALFA
21	31668596	->AACCTCATAA	ins	772118116		by-frequency	3_prime_UTR_variant	SOD1	AACCTCATAA:0.000008:1:ExAC
21	31668428	A>G	snv	772195986		by-frequency;by-cluster	intron_variant	SOD1	G:0.0000083:1:ExAC|G:0.000006:7:GnomAD_exomes
21	31660294	C>T	snv	772491982		by-frequency;by-alfa;by-cluster	intron_variant	SOD1	T:0.000259:1:ALSPAC|T:0.000027:4:GnomAD_genomes|T:0.00003:8:TOPMED|T:0.:0:TWINSUK|T:0.:0:ALFA
21	31668858	A>G	snv	772711633		by-frequency;by-alfa;by-cluster	3_prime_UTR_variant	SOD1	G:0.000519:2:ALSPAC|G:0.000287:67:GnomAD_exomes|G:0.000154:23:GnomAD_genomes|G:0.00014:37:TOPMED|G:0.:0:TWINSUK|G:0.000208:3:ALFA
21	31661402	C>G,T	snv	772763141		by-frequency;by-alfa;by-cluster	intron_variant	SOD1	T:0.000259:1:ALSPAC|T:0.000034:5:GnomAD_genomes|T:0.:0:TWINSUK|T:0.:0:ALFA
21	31668594	T>A,C,G	snv	772828451		by-frequency;by-alfa;by-cluster	3_prime_UTR_variant	SOD1	C:0.000066:8:ExAC|C:0.000015:4:TOPMED|G:0.:0:ALFA
21	31658711	G>T	snv	773143163		by-cluster	2KB_upstream_variant;upstream_transcript_variant	SOD1
21	31663553	G>A,C	snv	773165920		by-frequency;by-cluster	intron_variant;2KB_upstream_variant;upstream_transcript_variant	SOD1;LOC124900469	A:0.:0:ALSPAC|C:0.00001:1:TOMMO|A:0.00054:2:TWINSUK
21	31668036	G>A,T	snv	773366704		by-frequency;by-alfa;by-cluster	intron_variant	SOD1	A:0.000013:2:GnomAD_genomes|T:0.:0:ALFA
21	31660472	T>G	snv	773651558		by-frequency;by-cluster	intron_variant	SOD1	G:0.:0:ALSPAC|G:0.0003:1:TWINSUK
21	31666530	C>G,T	snv	773793650		by-frequency;by-cluster	intron_variant	SOD1	T:0.000009:1:ExAC
21	31663747	T>C	snv	773990137		by-frequency;by-cluster	intron_variant;2KB_upstream_variant;upstream_transcript_variant	SOD1;LOC124900469	C:0.000008:1:ExAC
21	31666390	G>C,T	snv	774127429		by-frequency;by-alfa;by-cluster	intron_variant	SOD1	T:0.:0:ALSPAC|T:0.000011:3:TOPMED|T:0.00027:1:TWINSUK|T:0.:0:ALFA
21	31667613	A>G	snv	774178426		by-frequency;by-alfa;by-cluster	intron_variant	SOD1	G:0.000778:3:ALSPAC|G:0.000241:36:GnomAD_genomes|G:0.000174:46:TOPMED|G:0.000539:2:TWINSUK|G:0.000208:3:ALFA
21	31664666	T>C	snv	774357938		by-frequency;by-alfa;by-cluster	500B_downstream_variant;intron_variant;downstream_transcript_variant	SOD1;LOC124900469	C:0.:0:ALSPAC|C:0.000023:6:TOPMED|C:0.00027:1:TWINSUK|C:0.:0:ALFA
21	31662717	T>A	snv	774588455		by-frequency;by-alfa;by-cluster	intron_variant;2KB_upstream_variant;upstream_transcript_variant	SOD1;LOC124900469	A:0.000047:7:GnomAD_genomes|A:0.000079:21:TOPMED|A:0.000142:2:ALFA
21	31658837	A>G	snv	774689536		by-frequency;by-alfa;by-cluster	2KB_upstream_variant;upstream_transcript_variant	SOD1	G:0.:0:ALSPAC|G:0.000004:1:TOPMED|G:0.00027:1:TWINSUK|G:0.:0:ALFA
21	31658182	C>A,T	snv	774925499		by-frequency;by-alfa;by-cluster	2KB_upstream_variant;upstream_transcript_variant	SOD1	T:0.000519:2:ALSPAC|T:0.001027:3:KOREAN|T:0.000829:6:Korea4K|T:0.000194:15:TOMMO|T:0.000072:19:TOPMED|T:0.:0:TWINSUK|T:0.000071:1:ALFA
21	31667417	A>G	snv	775049343		by-frequency;by-cluster	intron_variant	SOD1	G:0.000008:1:ExAC|G:0.000002:1:GnomAD_exomes
21	31666185	G>C,T	snv	775364736		by-frequency;by-alfa;by-cluster	intron_variant	SOD1	T:0.:0:ALSPAC|C:0.000007:1:GnomAD_genomes|C:0.000004:1:TOPMED|T:0.00027:1:TWINSUK|C:0.:0:ALFA
21	31668432	C>T	snv	775374443		by-frequency;by-alfa;by-cluster	intron_variant	SOD1	T:0.0000083:1:ExAC|T:0.0000088:11:GnomAD_exomes|T:0.0000201:3:GnomAD_genomes|T:0.0000038:1:TOPMED|T:0.:0:ALFA
21	31667453	G>A,C,T	snv	775561326		by-frequency;by-alfa;by-cluster	intron_variant	SOD1	A:0.00068:2:KOREAN|A:0.00003:2:TOMMO|C:0.:0:ALFA
21	31659721	T>A,C,G	snv	775589608		by-frequency;by-alfa;by-cluster	5_prime_UTR_variant	SOD1	A:0.000008:1:ExAC|C:0.:0:ALFA
21	31662285	A>G	snv	775694101		by-cluster	intron_variant	SOD1
21	31659190	G>A,C	snv	775749137		by-frequency;by-alfa;by-cluster	2KB_upstream_variant;upstream_transcript_variant	SOD1	C:0.000007:1:GnomAD_genomes|C:0.:0:ALFA
21	31663333	C>T	snv	775754179		by-frequency;by-cluster	intron_variant;2KB_upstream_variant;upstream_transcript_variant	SOD1;LOC124900469	T:0.:0:ALSPAC|T:0.0003:1:TWINSUK
21	31662905	->A	ins	776415000		by-frequency;by-alfa;by-cluster	intron_variant;2KB_upstream_variant;upstream_transcript_variant	SOD1;LOC124900469	A:0.000259:1:ALSPAC|A:0.000007:1:GnomAD_genomes|A:0.000004:1:TOPMED|A:0.:0:TWINSUK|A:0.:0:ALFA
21	31668606	->CTTA	delins	776422349		by-frequency;by-alfa;by-cluster	3_prime_UTR_variant	SOD1	CTTA:0.0000083:1:ExAC|CTTA:0.0000048:6:GnomAD_exomes|CTTA:0.:0:GnomAD_genomes|CTTA:0.0000038:1:TOPMED|CTTACTTA:0.:0:ALFA
21	31662735	C>T	snv	776791863		by-frequency;by-alfa;by-cluster	intron_variant;2KB_upstream_variant;upstream_transcript_variant	SOD1;LOC124900469	T:0.000519:2:ALSPAC|T:0.000034:5:GnomAD_genomes|T:0.00003:8:TOPMED|T:0.:0:TWINSUK|T:0.:0:ALFA
21	31668450	T>C	snv	776799530		by-frequency;by-alfa;by-cluster	intron_variant	SOD1	C:0.0000165:2:ExAC|C:0.0000102:14:GnomAD_exomes|C:0.0000067:1:GnomAD_genomes|C:0.0000189:5:TOPMED|C:0.:0:ALFA
21	31668579	A>G	snv	776859347		by-frequency;by-cluster	3_prime_UTR_variant	SOD1	G:0.0000083:1:ExAC|G:0.0000007:1:GnomAD_exomes
21	31663898	G>T	snv	776992135		by-frequency;by-alfa;by-cluster	intron_variant;2KB_upstream_variant;upstream_transcript_variant	SOD1;LOC124900469	T:0.000016:2:ExAC|T:0.000007:4:GnomAD_exomes|T:0.000013:1:TOMMO|T:0.000004:1:TOPMED|T:0.:0:ALFA
21	31668313	G>C,T	snv	777018910		by-frequency;by-alfa;by-cluster	intron_variant	SOD1	T:0.000013:2:GnomAD_genomes|T:0.:0:ALFA
21	31666557	T>A	snv	777389559		by-frequency;by-cluster	intron_variant	SOD1	A:0.0000198:2:ExAC|A:0.0000101:12:GnomAD_exomes
21	31657700	T>A	snv	777558482		by-frequency;by-cluster	2KB_upstream_variant;upstream_transcript_variant	SOD1	A:0.:0:ALSPAC|A:0.0003:1:TWINSUK
21	31663821	G>A,C,T	snv	777560607		by-frequency;by-alfa;by-cluster	coding_sequence_variant;missense_variant;2KB_upstream_variant;upstream_transcript_variant	SOD1;LOC124900469	T:0.000008:1:ExAC|C:0.000002:1:GnomAD_exomes|T:0.000007:1:GnomAD_genomes|A:0.000342:1:KOREAN|T:0.000011:3:TOPMED|T:0.:0:ALFA
21	31661312	T>C	snv	778221878		by-frequency;by-cluster	intron_variant	SOD1	C:0.0003:1:ALSPAC|C:0.:0:TWINSUK
21	31666485	C>A,T	snv	778327622		by-frequency;by-cluster	coding_sequence_variant;missense_variant	SOD1	T:0.000018:2:ExAC
21	31660251	->G	delins	778422440			intron_variant	SOD1
21	31662619	G>C	snv	778472402		by-frequency;by-alfa;by-cluster	intron_variant;2KB_upstream_variant;upstream_transcript_variant	SOD1;LOC124900469	C:0.000259:1:ALSPAC|C:0.00004:6:GnomAD_genomes|C:0.00003:8:TOPMED|C:0.:0:TWINSUK|C:0.:0:ALFA
21	31660948	A>G	snv	778559898		by-frequency;by-alfa;by-cluster	intron_variant	SOD1	G:0.000013:2:GnomAD_genomes|G:0.000034:9:TOPMED|G:0.000071:1:ALFA
21	31667376	G>T	snv	779393665		by-frequency;by-alfa;by-cluster	splice_donor_variant	SOD1	T:0.0000082:1:ExAC|T:0.0000029:4:GnomAD_exomes|T:0.:0:ALFA
21	31660646	T>A	snv	779519278		by-cluster	intron_variant	SOD1
21	31661172	G>A,T	snv	779730589		by-frequency;by-alfa;by-cluster	intron_variant	SOD1	A:0.000259:1:ALSPAC|A:0.000007:1:GnomAD_genomes|A:0.:0:TWINSUK|T:0.:0:ALFA
21	31664304	C>A,G,T	snv	780166226		by-frequency;by-alfa;by-cluster	intron_variant;2KB_upstream_variant;upstream_transcript_variant	SOD1;LOC124900469	G:0.:0:ALSPAC|T:0.000007:1:GnomAD_genomes|T:0.000015:4:TOPMED|G:0.00027:1:TWINSUK|T:0.:0:ALFA
21	31666164	GG>-	delins	780299901		by-frequency;by-cluster	intron_variant	SOD1	-:0.0003:1:ALSPAC|-:0.0019:7:TWINSUK
21	31665476	T>G	snv	780400576		by-frequency;by-cluster	intron_variant	SOD1	G:0.:0:ALSPAC|G:0.0003:1:TWINSUK
21	31659884	C>T	snv	780405968		by-frequency;by-alfa;by-cluster	intron_variant	SOD1	T:0.0000085:1:ExAC|T:0.0000051:7:GnomAD_exomes|T:0.0000134:2:GnomAD_genomes|T:0.0000076:2:TOPMED|T:0.:0:ALFA
21	31661829	GATAGTGGAG>-	delins	780429440		by-frequency;by-alfa;by-cluster	intron_variant	SOD1	-:0.:0:ALSPAC|-:0.000007:1:GnomAD_genomes|-:0.00027:1:TWINSUK|G:0.:0:ALFA
21	31667307	G>-	del	780665387		by-frequency;by-cluster	coding_sequence_variant;frameshift_variant	SOD1	-:0.0000082:1:ExAC|-:0.0000014:2:GnomAD_exomes
21	31666435	C>T	snv	780864032		by-frequency;by-alfa;by-cluster	intron_variant	SOD1	T:0.00001:1:ExAC|T:0.0008:13:ALFA
21	31659606	G>A,T	snv	780922430		by-frequency;by-alfa;by-cluster	2KB_upstream_variant;upstream_transcript_variant	SOD1	A:0.00052:2:ALSPAC|A:0.00027:1:TWINSUK|T:0.:0:ALFA
21	31668520	C>T	snv	781031581		by-frequency;by-alfa;by-cluster	coding_sequence_variant;missense_variant	SOD1	T:0.0000082:1:ExAC|T:0.00003:42:GnomAD_exomes|T:0.0000134:2:GnomAD_genomes|T:0.0000151:4:TOPMED|T:0.0001423:2:ALFA
21	31666891	TA>-	del	781037384		by-frequency;by-alfa;by-cluster	intron_variant	SOD1	-:0.000259:1:ALSPAC|-:0.000004:1:TOPMED|-:0.:0:TWINSUK|-:0.000094:1:ALFA
21	31669381	T>C	snv	781115142		by-cluster	500B_downstream_variant;downstream_transcript_variant	SOD1
21	31664165	G>C	snv	781721590		by-frequency;by-alfa;by-cluster	intron_variant;2KB_upstream_variant;upstream_transcript_variant	SOD1;LOC124900469	C:0.000259:1:ALSPAC|C:0.000036:8:GnomAD_exomes|C:0.000027:4:GnomAD_genomes|C:0.000026:7:TOPMED|C:0.:0:TWINSUK|C:0.:0:ALFA
21	31660389	GAA>AAT	mnv	796163339			intron_variant	SOD1
21	31659092	G>A	snv	796255780		by-frequency;by-alfa;by-cluster	2KB_upstream_variant;upstream_transcript_variant	SOD1	A:0.0001:15:GnomAD_genomes|A:0.000091:24:TOPMED|A:0.000214:3:ALFA
21	31664905	C>G,T	snv	865975984		by-frequency;by-alfa;by-cluster	500B_downstream_variant;intron_variant;downstream_transcript_variant	SOD1;LOC124900469	T:0.00926:2:Qatari|T:0.:0:ALFA
21	31657726	T>C	snv	866221758		by-frequency	2KB_upstream_variant;upstream_transcript_variant	SOD1	C:0.005:1:Qatari
21	31667813	A>G	snv	866248527		by-frequency	intron_variant	SOD1	G:0.005:1:Qatari
21	31660994	C>G,T	snv	866530375		by-frequency;by-alfa;by-cluster	intron_variant	SOD1	T:0.:0:GnomAD_genomes|G:0.00463:1:Qatari|G:0.000008:2:TOPMED|G:0.:0:ALFA
21	31665548	G>A	snv	867031285		by-frequency;by-alfa;by-cluster	intron_variant	SOD1	A:0.009259:2:Qatari|A:0.000013:1:TOMMO|A:0.000023:6:TOPMED|A:0.:0:ALFA
21	31660719	C>G,T	snv	867524540		by-frequency;by-alfa;by-cluster	intron_variant	SOD1	G:0.00463:1:Qatari|C:0.5:1:SGDP_PRJ|G:0.000004:1:TOPMED|T:0.:0:ALFA
21	31660145	C>G,T	snv	868153253		by-frequency;by-alfa;by-cluster	intron_variant	SOD1	T:0.000013:2:GnomAD_genomes|G:0.00069:2:KOREAN|T:0.00463:1:Qatari|T:0.000008:2:TOPMED|T:0.:0:ALFA
21	31662608	C>T	snv	878886187		by-frequency;by-cluster	intron_variant;2KB_upstream_variant;upstream_transcript_variant	SOD1;LOC124900469	T:0.00001:1:TOMMO
21	31663887	->C,CTGTACCAGTGCAGGTCCTCACTTTAATCCTCTA	ins	879086133		by-cluster	upstream_transcript_variant;2KB_upstream_variant;splice_donor_variant	SOD1;LOC124900469
21	31665496	C>A	snv	879159560			intron_variant	SOD1
21	31659843	C>A,T	snv	879164769		by-frequency;by-alfa;by-cluster	splice_donor_variant	SOD1	T:0.000001:1:GnomAD_exomes|T:0.000004:1:TOPMED|T:0.:0:ALFA
21	31668469	A>T	snv	879209309			splice_acceptor_variant	SOD1
21	31659680	G>-,GG	delins	879551362		by-frequency;by-alfa;by-cluster	2KB_upstream_variant;upstream_transcript_variant	SOD1	-:0.000101:15:GnomAD_genomes|-:0.00011:29:TOPMED|GGGGG:0.000071:1:ALFA
21	31658263	CCCT>-	del	879798862		by-frequency;by-alfa;by-cluster	2KB_upstream_variant;upstream_transcript_variant	SOD1	-:0.000011:3:TOPMED|-:0.:0:ALFA
21	31664099	G>A	snv	879940576		by-frequency;by-alfa;by-cluster	intron_variant;2KB_upstream_variant;upstream_transcript_variant	SOD1;LOC124900469	A:0.000067:10:GnomAD_genomes|A:0.001667:1:NorthernSweden|A:0.000038:10:TOPMED|A:0.000142:2:ALFA
21	31665682	G>A,T	snv	886404955		by-frequency;by-alfa;by-cluster	intron_variant	SOD1	T:0.00001:1:TOMMO|T:0.:0:ALFA
21	31666098	A>C	snv	886550146			intron_variant	SOD1
21	31663529	T>C	snv	887594796		by-frequency;by-alfa;by-cluster	intron_variant;2KB_upstream_variant;upstream_transcript_variant	SOD1;LOC124900469	C:0.000007:1:GnomAD_genomes|C:0.000019:5:TOPMED|C:0.:0:ALFA
21	31663116	C>A,T	snv	887721039		by-frequency;by-alfa;by-cluster	intron_variant;2KB_upstream_variant;upstream_transcript_variant	SOD1;LOC124900469	T:0.000035:5:GnomAD_genomes|T:0.000013:1:TOMMO|T:0.:0:ALFA
21	31659429	T>A,C,G	snv	887970151		by-frequency;by-alfa;by-cluster	2KB_upstream_variant;upstream_transcript_variant	SOD1	G:0.000016:4:GnomAD_exomes|C:0.:0:ALFA
21	31664592	C>T	snv	888069256		by-frequency;by-alfa;by-cluster	500B_downstream_variant;intron_variant;downstream_transcript_variant	SOD1;LOC124900469	T:0.000007:1:GnomAD_genomes|T:0.000019:5:TOPMED|T:0.:0:ALFA
21	31667927	T>A,C	snv	888217632		by-frequency;by-cluster	intron_variant	SOD1	A:0.:0:GnomAD_genomes
21	31662180	A>C,G	snv	888601863		by-frequency;by-cluster	intron_variant	SOD1	C:0.00001:1:TOMMO
21	31661864	A>G	snv	888706754		by-frequency;by-alfa;by-cluster	intron_variant	SOD1	G:0.000007:1:GnomAD_genomes|G:0.000008:2:TOPMED|G:0.:0:ALFA
21	31659485	G>A	snv	889208254		by-frequency;by-alfa;by-cluster	2KB_upstream_variant;upstream_transcript_variant	SOD1	A:0.000014:5:GnomAD_exomes|A:0.000013:2:GnomAD_genomes|A:0.000023:6:TOPMED|A:0.:0:ALFA
21	31664181	C>G	snv	889261235		by-frequency;by-alfa;by-cluster	intron_variant;2KB_upstream_variant;upstream_transcript_variant	SOD1;LOC124900469	G:0.000009:2:GnomAD_exomes|G:0.00004:6:GnomAD_genomes|G:0.000011:3:TOPMED|G:0.:0:ALFA
21	31664743	T>A,C	snv	889277278		by-frequency;by-alfa;by-cluster	500B_downstream_variant;intron_variant;downstream_transcript_variant	SOD1;LOC124900469	C:0.00031:2:1000Genomes_30X|C:0.:0:ALFA
21	31663979	T>A	snv	889313634		by-frequency;by-alfa;by-cluster	intron_variant;2KB_upstream_variant;upstream_transcript_variant	SOD1;LOC124900469	A:0.000007:1:GnomAD_genomes|A:0.000011:3:TOPMED|A:0.:0:ALFA
21	31659288	C>T	snv	889322756			2KB_upstream_variant;upstream_transcript_variant	SOD1
21	31664588	C>G,T	snv	889383964		by-frequency;by-alfa;by-cluster	500B_downstream_variant;intron_variant;downstream_transcript_variant	SOD1;LOC124900469	G:0.001339:6:Estonian|T:0.000004:1:TOPMED|G:0.000324:6:ALFA
21	31669317	A>G	snv	889480011		by-frequency;by-alfa;by-cluster	500B_downstream_variant;downstream_transcript_variant	SOD1	G:0.000156:1:1000Genomes_30X|G:0.000054:8:GnomAD_genomes|G:0.000342:1:KOREAN|G:0.000079:21:TOPMED|G:0.000071:1:ALFA
21	31666968	A>G,T	snv	890079434		by-frequency;by-alfa;by-cluster	intron_variant	SOD1	T:0.:0:ALFA
21	31660371	G>C	snv	890895418			intron_variant	SOD1
21	31662750	T>C,G	snv	890937207		by-frequency;by-alfa;by-cluster	intron_variant;2KB_upstream_variant;upstream_transcript_variant	SOD1;LOC124900469	C:0.000065:5:TOMMO|C:0.00006:16:TOPMED|C:0.000071:1:ALFA
21	31666056	C>G	snv	890939762			intron_variant	SOD1
21	31668125	AAAA>-,AAA,AAAAA	delins	891138565		by-frequency;by-alfa;by-cluster	intron_variant	SOD1	A:0.000013:2:GnomAD_genomes|-:0.000065:5:TOMMO|AAAAAA:0.:0:ALFA
21	31662808	A>G	snv	891562942		by-frequency;by-cluster	intron_variant;2KB_upstream_variant;upstream_transcript_variant	SOD1;LOC124900469	G:0.000007:1:GnomAD_genomes
21	31657872	T>A,C,G	snv	892053834		by-frequency;by-alfa;by-cluster	2KB_upstream_variant;upstream_transcript_variant	SOD1	G:0.00004:3:TOMMO|C:0.:0:ALFA
21	31659620	T>G	snv	892157956		by-frequency;by-alfa;by-cluster	2KB_upstream_variant;upstream_transcript_variant	SOD1	G:0.000007:4:GnomAD_exomes|G:0.000007:1:GnomAD_genomes|G:0.000013:1:TOMMO|G:0.000004:1:TOPMED|G:0.:0:ALFA
21	31661447	T>C,G	snv	892519233		by-frequency;by-alfa;by-cluster	intron_variant	SOD1	C:0.000007:1:GnomAD_genomes|C:0.000011:3:TOPMED|C:0.:0:ALFA
21	31661617	C>T	snv	892571798		by-frequency;by-alfa;by-cluster	intron_variant	SOD1	T:0.00002:3:GnomAD_genomes|T:0.00009:7:TOMMO|T:0.000026:7:TOPMED|T:0.:0:ALFA
21	31666969	T>C	snv	892692425		by-frequency;by-alfa;by-cluster	intron_variant	SOD1	C:0.000004:1:TOPMED|C:0.:0:ALFA
21	31662277	G>A	snv	892920860		by-frequency;by-alfa	intron_variant	SOD1	A:0.000008:2:TOPMED|A:0.:0:ALFA
21	31658853	T>C	snv	893159784		by-frequency;by-alfa;by-cluster	2KB_upstream_variant;upstream_transcript_variant	SOD1	C:0.000007:1:GnomAD_genomes|C:0.000019:5:TOPMED|C:0.:0:ALFA
21	31664173	A>G,T	snv	893245610		by-frequency;by-alfa;by-cluster	intron_variant;2KB_upstream_variant;upstream_transcript_variant	SOD1;LOC124900469	T:0.000008:2:TOPMED|T:0.000094:1:ALFA
21	31658939	T>A	snv	893784126		by-frequency;by-alfa;by-cluster	2KB_upstream_variant;upstream_transcript_variant	SOD1	A:0.000007:1:GnomAD_genomes|A:0.000004:1:TOPMED|A:0.:0:ALFA
21	31658678	A>T	snv	893837892		by-frequency;by-alfa;by-cluster	2KB_upstream_variant;upstream_transcript_variant	SOD1	T:0.00002:3:GnomAD_genomes|T:0.000011:3:TOPMED|T:0.:0:ALFA
21	31663578	C>T	snv	893933075		by-frequency;by-alfa;by-cluster	intron_variant;2KB_upstream_variant;upstream_transcript_variant	SOD1;LOC124900469	T:0.000013:2:GnomAD_genomes|T:0.000019:5:TOPMED|T:0.000071:1:ALFA
21	31661930	C>G,T	snv	894120333		by-frequency;by-alfa	intron_variant	SOD1	G:0.000004:1:TOPMED|T:0.:0:ALFA
21	31661332	C>T	snv	894402049		by-frequency;by-alfa;by-cluster	intron_variant	SOD1	T:0.000034:5:GnomAD_genomes|T:0.003765:11:KOREAN|T:0.002729:5:Korea1K|T:0.003732:27:Korea4K|T:0.004713:365:TOMMO|T:0.000011:3:TOPMED|T:0.:0:ALFA
21	31659718	G>A,C,T	snv	894847258		by-frequency;by-alfa;by-cluster	5_prime_UTR_variant	SOD1	T:0.00022:1:Estonian|T:0.00005:1:ALFA
21	31665414	C>G	snv	894914571		by-frequency;by-alfa;by-cluster	intron_variant	SOD1	G:0.:0:ALFA
21	31660656	T>C	snv	895797217		by-frequency;by-alfa;by-cluster	intron_variant	SOD1	C:0.00002:3:GnomAD_genomes|C:0.000015:4:TOPMED|C:0.:0:ALFA
21	31660444	C>T	snv	895849693		by-frequency;by-alfa	intron_variant	SOD1	T:0.000004:1:TOPMED|T:0.:0:ALFA
21	31666300	C>A,T	snv	895885570		by-frequency;by-alfa;by-cluster	intron_variant	SOD1	A:0.000002:1:GnomAD_exomes|T:0.000013:2:GnomAD_genomes|T:0.000011:3:TOPMED|T:0.:0:ALFA
21	31666094	A>G	snv	895949905		by-frequency;by-alfa;by-cluster	intron_variant	SOD1	G:0.00002:3:GnomAD_genomes|G:0.000034:9:TOPMED|G:0.:0:ALFA
21	31662283	G>A	snv	896035021		by-frequency;by-alfa;by-cluster	intron_variant	SOD1	A:0.00004:6:GnomAD_genomes|A:0.000076:20:TOPMED|A:0.000071:1:ALFA
21	31662529	G>A	snv	896086108		by-frequency;by-alfa;by-cluster	intron_variant;2KB_upstream_variant;upstream_transcript_variant	SOD1;LOC124900469	A:0.00006:9:GnomAD_genomes|A:0.000053:14:TOPMED|A:0.:0:ALFA
21	31660934	A>C	snv	896527155		by-frequency;by-alfa;by-cluster	intron_variant	SOD1	C:0.000007:1:GnomAD_genomes|C:0.000008:2:TOPMED|C:0.:0:ALFA
21	31666878	T>C	snv	896579431		by-frequency;by-alfa;by-cluster	intron_variant	SOD1	C:0.000027:4:GnomAD_genomes|C:0.000023:6:TOPMED|C:0.:0:ALFA
21	31658247	T>C	snv	896912382		by-frequency;by-alfa;by-cluster	2KB_upstream_variant;upstream_transcript_variant	SOD1	C:0.000013:2:GnomAD_genomes|C:0.000015:4:TOPMED|C:0.:0:ALFA
21	31662547	C>T	snv	897111513		by-frequency;by-alfa;by-cluster	intron_variant;2KB_upstream_variant;upstream_transcript_variant	SOD1;LOC124900469	T:0.000013:2:GnomAD_genomes|T:0.000011:3:TOPMED|T:0.:0:ALFA
21	31663219	C>A,T	snv	897154618		by-frequency;by-alfa;by-cluster	intron_variant;2KB_upstream_variant;upstream_transcript_variant	SOD1;LOC124900469	T:0.000081:11:GnomAD_genomes|T:0.000128:34:TOPMED|T:0.000084:1:ALFA
21	31668758	A>-	del	897173536		by-frequency;by-alfa;by-cluster	3_prime_UTR_variant	SOD1	-:0.000005:2:GnomAD_exomes|-:0.00002:3:GnomAD_genomes|-:0.000015:4:TOPMED|-:0.:0:ALFA
21	31658275	C>T	snv	897645188		by-frequency;by-alfa;by-cluster	2KB_upstream_variant;upstream_transcript_variant	SOD1	T:0.000027:4:GnomAD_genomes|T:0.000019:5:TOPMED|T:0.000142:2:ALFA
21	31658464	A>C	snv	897692992		by-cluster	2KB_upstream_variant;upstream_transcript_variant	SOD1
21	31663586	C>T	snv	897707976			intron_variant;2KB_upstream_variant;upstream_transcript_variant	SOD1;LOC124900469
21	31659224	A>G	snv	897967881		by-frequency;by-alfa;by-cluster	2KB_upstream_variant;upstream_transcript_variant	SOD1	G:0.000054:8:GnomAD_genomes|G:0.000091:24:TOPMED|G:0.:0:ALFA
21	31664277	C>T	snv	898064965		by-frequency;by-alfa;by-cluster	intron_variant;2KB_upstream_variant;upstream_transcript_variant	SOD1;LOC124900469	T:0.000053:6:GnomAD_exomes|T:0.000007:1:GnomAD_genomes|T:0.000008:2:TOPMED|T:0.:0:ALFA
21	31660389	G>A	snv	898309189		by-frequency;by-alfa;by-cluster	intron_variant	SOD1	A:0.000047:7:GnomAD_genomes|A:0.000023:6:TOPMED|A:0.:0:ALFA
21	31666087	T>A	snv	898386504			intron_variant	SOD1
21	31664625	T>A,G	snv	898826373		by-frequency;by-alfa	500B_downstream_variant;intron_variant;downstream_transcript_variant	SOD1;LOC124900469	G:0.:0:ALFA
21	31667161	->T	delins	898844708		by-frequency;by-alfa;by-cluster	intron_variant	SOD1	T:0.00002:3:GnomAD_genomes|T:0.000008:2:TOPMED|TTTT:0.:0:ALFA
21	31666981	->G,GG	delins	898896780		by-frequency;by-alfa;by-cluster	intron_variant	SOD1	GGGGG:0.:0:ALFA
21	31659500	C>A,G,T	snv	899317463		by-frequency;by-alfa;by-cluster	2KB_upstream_variant;upstream_transcript_variant	SOD1	T:0.000013:2:GnomAD_genomes|T:0.000342:1:KOREAN|A:0.000013:1:TOMMO|T:0.:0:ALFA
21	31659589	C>A	snv	899372692		by-frequency;by-alfa;by-cluster	2KB_upstream_variant;upstream_transcript_variant	SOD1	A:0.000017:8:GnomAD_exomes|A:0.000007:1:GnomAD_genomes|A:0.:0:ALFA
21	31664778	C>G	snv	899383121			500B_downstream_variant;intron_variant;downstream_transcript_variant	SOD1;LOC124900469
21	31667445	T>A,G	snv	899506121		by-frequency;by-alfa;by-cluster	intron_variant	SOD1	A:0.000012:11:GnomAD_exomes|G:0.:0:ALFA
21	31661644	G>A	snv	899986079		by-frequency;by-cluster	intron_variant	SOD1	A:0.00001:1:TOMMO
21	31661807	G>C	snv	900036880		by-frequency;by-alfa;by-cluster	intron_variant	SOD1	C:0.000013:2:GnomAD_genomes|C:0.000023:6:TOPMED|C:0.000071:1:ALFA
21	31665770	G>T	snv	900509952			intron_variant	SOD1
21	31658191	T>C	snv	901547673		by-frequency;by-alfa;by-cluster	2KB_upstream_variant;upstream_transcript_variant	SOD1	C:0.000156:1:1000Genomes_30X|C:0.000114:17:GnomAD_genomes|C:0.000159:42:TOPMED|C:0.000071:1:ALFA
21	31663077	A>G,T	snv	901556022		by-frequency;by-alfa;by-cluster	intron_variant;2KB_upstream_variant;upstream_transcript_variant	SOD1;LOC124900469	G:0.:0:ALFA
21	31660122	->GGCGGG	delins	901609623		by-frequency;by-alfa;by-cluster	intron_variant	SOD1	GGGGCG:0.000048:7:GnomAD_genomes|GGGGCG:0.000013:1:TOMMO|GGGGCG:0.000038:10:TOPMED|GGGGCGGGGGCGGGGGCGGG:0.000071:1:ALFA
21	31662841	C>A,G,T	snv	901662168		by-frequency;by-alfa;by-cluster	intron_variant;2KB_upstream_variant;upstream_transcript_variant	SOD1;LOC124900469	T:0.000223:1:Estonian|G:0.000013:1:TOMMO|T:0.00003:8:TOPMED|T:0.000061:1:ALFA
21	31669244	C>T	snv	901724907		by-frequency;by-alfa;by-cluster	500B_downstream_variant;downstream_transcript_variant	SOD1	T:0.000007:1:GnomAD_genomes|T:0.000138:1:Korea4K|T:0.000008:2:TOPMED|T:0.:0:ALFA
21	31665141	T>C	snv	901805520		by-frequency;by-alfa	intron_variant	SOD1	C:0.000008:2:TOPMED|C:0.:0:ALFA
21	31660116	C>T	snv	902164891		by-frequency;by-alfa;by-cluster	intron_variant	SOD1	T:0.001113:20:GnomAD_exomes|T:0.000667:99:GnomAD_genomes|T:0.000899:238:TOPMED|T:0.001248:18:ALFA
21	31659727	T>C,G	snv	902279948		by-frequency;by-cluster	5_prime_UTR_variant	SOD1	C:0.0000022:3:GnomAD_exomes
21	31662220	G>A,C	snv	902870854		by-frequency;by-alfa;by-cluster	intron_variant	SOD1	C:0.00004:6:GnomAD_genomes|C:0.000071:1:ALFA
21	31667487	A>C	snv	903040501		by-frequency;by-alfa;by-cluster	intron_variant	SOD1	C:0.000007:1:GnomAD_genomes|C:0.000011:3:TOPMED|C:0.:0:ALFA
21	31659217	G>A	snv	903169188		by-frequency;by-alfa;by-cluster	2KB_upstream_variant;upstream_transcript_variant	SOD1	A:0.00004:6:GnomAD_genomes|A:0.000057:15:TOPMED|A:0.000071:1:ALFA
21	31659454	G>A	snv	903222563		by-frequency;by-alfa;by-cluster	2KB_upstream_variant;upstream_transcript_variant	SOD1	A:0.000109:31:GnomAD_exomes|A:0.000107:16:GnomAD_genomes|A:0.000138:1:Korea4K|A:0.000094:25:TOPMED|A:0.000214:3:ALFA
21	31664568	G>A	snv	903229431		by-frequency;by-alfa;by-cluster	500B_downstream_variant;intron_variant;downstream_transcript_variant	SOD1;LOC124900469	A:0.00002:3:GnomAD_genomes|A:0.000034:9:TOPMED|A:0.000142:2:ALFA
21	31665089	T>G	snv	903725681		by-frequency;by-alfa;by-cluster	intron_variant	SOD1	G:0.000013:2:GnomAD_genomes|G:0.000004:1:TOPMED|G:0.:0:ALFA
21	31661394	C>T	snv	903831664		by-frequency;by-alfa;by-cluster	intron_variant	SOD1	T:0.00002:3:GnomAD_genomes|T:0.000011:3:TOPMED|T:0.:0:ALFA
21	31661021	T>C	snv	903957611		by-frequency;by-alfa;by-cluster	intron_variant	SOD1	C:0.000007:1:GnomAD_genomes|C:0.000004:1:TOPMED|C:0.:0:ALFA
21	31666895	C>A,G,T	snv	904013781		by-frequency;by-alfa;by-cluster	intron_variant	SOD1	T:0.00001:1:TOMMO|G:0.:0:ALFA
21	31660092	A>G	snv	904599425		by-frequency;by-alfa;by-cluster	intron_variant	SOD1	G:0.000007:1:GnomAD_genomes|A:0.5:1:Siberian|G:0.:0:ALFA
21	31660678	C>G,T	snv	904600718		by-frequency;by-alfa;by-cluster	intron_variant	SOD1	G:0.000007:1:GnomAD_genomes|T:0.:0:ALFA
21	31664619	GTTT>-,GTTTGTTT	delins	904938454		by-frequency;by-alfa;by-cluster	500B_downstream_variant;intron_variant;downstream_transcript_variant	SOD1;LOC124900469	-:0.000148:22:GnomAD_genomes|-:0.000116:9:TOMMO|TTTGTTTGTTTGTTTGTTT:0.:0:ALFA
21	31662543	T>G	snv	905514967			intron_variant;2KB_upstream_variant;upstream_transcript_variant	SOD1;LOC124900469
21	31660614	C>T	snv	905731184		by-frequency;by-alfa;by-cluster	intron_variant	SOD1	T:0.000007:1:GnomAD_genomes|T:0.000008:2:TOPMED|T:0.:0:ALFA
21	31660418	G>C	snv	905786703		by-frequency;by-alfa;by-cluster	intron_variant	SOD1	C:0.000007:1:GnomAD_genomes|C:0.000004:1:TOPMED|C:0.:0:ALFA
21	31660207	C>G	snv	905835897		by-frequency;by-alfa;by-cluster	intron_variant	SOD1	G:0.00006:9:GnomAD_genomes|G:0.000083:22:TOPMED|G:0.:0:ALFA
21	31665698	C>T	snv	905944906		by-frequency;by-alfa;by-cluster	intron_variant	SOD1	T:0.00002:3:GnomAD_genomes|T:0.000019:5:TOPMED|T:0.000071:1:ALFA
21	31665123	A>G	snv	906193280		by-frequency;by-alfa;by-cluster	intron_variant	SOD1	G:0.000027:4:GnomAD_genomes|G:0.000138:1:Korea4K|G:0.000039:3:TOMMO|G:0.:0:ALFA
21	31658902	C>A	snv	906401531		by-frequency;by-alfa;by-cluster	2KB_upstream_variant;upstream_transcript_variant	SOD1	A:0.000007:1:GnomAD_genomes|A:0.000011:3:TOPMED|A:0.:0:ALFA
21	31663523	A>C,G	snv	906560821		by-frequency;by-alfa;by-cluster	intron_variant;2KB_upstream_variant;upstream_transcript_variant	SOD1;LOC124900469	G:0.00001:1:TOMMO|G:0.:0:ALFA
21	31659712	C>G,T	snv	906695375		by-frequency;by-alfa;by-cluster	5_prime_UTR_variant	SOD1	T:0.000013:2:GnomAD_genomes|T:0.000045:12:TOPMED|T:0.000071:1:ALFA
21	31669059	T>C	snv	906718739		by-frequency;by-alfa;by-cluster	500B_downstream_variant;downstream_transcript_variant	SOD1	C:0.000034:5:GnomAD_genomes|C:0.000019:5:TOPMED|C:0.:0:ALFA
21	31659607	C>G,T	snv	906810483		by-frequency;by-alfa;by-cluster	2KB_upstream_variant;upstream_transcript_variant	SOD1	T:0.:0:ALFA
21	31664010	C>G,T	snv	907183546		by-frequency;by-alfa;by-cluster	intron_variant;2KB_upstream_variant;upstream_transcript_variant	SOD1;LOC124900469	T:0.000047:7:GnomAD_genomes|T:0.002396:7:KOREAN|T:0.000546:1:Korea1K|T:0.000691:5:Korea4K|T:0.009103:705:TOMMO|T:0.:0:ALFA
21	31659694	C>A,G,T	snv	907404744		by-frequency;by-alfa;by-cluster	5_prime_UTR_variant	SOD1	T:0.000007:1:GnomAD_genomes|T:0.000013:1:TOMMO|T:0.:0:ALFA
21	31659601	->G	delins	907455510		by-frequency;by-alfa;by-cluster	2KB_upstream_variant;upstream_transcript_variant	SOD1	G:0.00001:5:GnomAD_exomes|G:0.00008:12:GnomAD_genomes|G:0.000117:31:TOPMED|GG:0.000142:2:ALFA
21	31660742	G>A,C	snv	907567306		by-frequency;by-alfa;by-cluster	intron_variant	SOD1	C:0.00004:6:GnomAD_genomes|C:0.:0:ALFA
21	31666208	A>G	snv	907734134		by-frequency;by-alfa;by-cluster	intron_variant	SOD1	G:0.000007:1:GnomAD_genomes|G:0.000038:10:TOPMED|G:0.:0:ALFA
21	31666026	C>A	snv	907777543		by-frequency;by-alfa	intron_variant	SOD1	A:0.000007:1:GnomAD_genomes|A:0.:0:ALFA
21	31661494	G>C	snv	908308962		by-cluster	intron_variant	SOD1
21	31666770	G>A,C	snv	908415270		by-frequency;by-alfa;by-cluster	intron_variant	SOD1	C:0.000007:1:GnomAD_genomes|C:0.000008:2:TOPMED|C:0.:0:ALFA
21	31667086	C>A,G,T	snv	908467270		by-frequency;by-alfa;by-cluster	intron_variant	SOD1	G:0.000007:1:GnomAD_genomes|G:0.000004:1:TOPMED|T:0.:0:ALFA
21	31662088	C>A,G	snv	908590525		by-frequency;by-alfa;by-cluster	intron_variant	SOD1	G:0.00014:1:Korea4K|G:0.:0:ALFA
21	31661801	G>T	snv	908641592		by-frequency;by-alfa	intron_variant	SOD1	T:0.:0:ALFA
21	31667375	G>A,T	snv	908732457		by-frequency;by-alfa;by-cluster	coding_sequence_variant;synonymous_variant	SOD1	T:0.0000007:1:GnomAD_exomes|A:0.0000038:1:TOPMED|A:0.:0:ALFA
21	31667140	T>C	snv	908790296		by-frequency;by-alfa;by-cluster	intron_variant	SOD1	C:0.000006:3:GnomAD_exomes|C:0.000004:1:TOPMED|C:0.:0:ALFA
21	31658744	G>A,T	snv	908902071		by-frequency;by-alfa;by-cluster	2KB_upstream_variant;upstream_transcript_variant	SOD1	T:0.000007:1:GnomAD_genomes|T:0.:0:ALFA
21	31663940	C>A,T	snv	909086277		by-frequency;by-alfa;by-cluster	intron_variant;2KB_upstream_variant;upstream_transcript_variant	SOD1;LOC124900469	T:0.000034:5:GnomAD_genomes|C:0.5:1:SGDP_PRJ|T:0.00003:8:TOPMED|T:0.000071:1:ALFA
21	31659684	T>A,C,G	snv	909291858		by-frequency;by-alfa;by-cluster	2KB_upstream_variant;upstream_transcript_variant	SOD1	C:0.000076:20:TOPMED|G:0.:0:ALFA
21	31664733	C>G	snv	909454943		by-frequency;by-alfa	500B_downstream_variant;intron_variant;downstream_transcript_variant	SOD1;LOC124900469	G:0.000015:4:TOPMED|G:0.:0:ALFA
21	31662518	T>G	snv	910082780			intron_variant;2KB_upstream_variant;upstream_transcript_variant	SOD1;LOC124900469
21	31668397	A>G	snv	910096409		by-frequency;by-alfa;by-cluster	intron_variant	SOD1	G:0.000004:3:GnomAD_exomes|G:0.000008:2:TOPMED|G:0.:0:ALFA
21	31668742	C>T	snv	910155762		by-frequency;by-alfa;by-cluster	3_prime_UTR_variant	SOD1	T:0.000004:2:GnomAD_exomes|T:0.:0:GnomAD_genomes|T:0.000011:3:TOPMED|T:0.:0:ALFA
21	31659574	G>C,T	snv	910528252		by-frequency;by-cluster	2KB_upstream_variant;upstream_transcript_variant	SOD1	T:0.000002:1:GnomAD_exomes
21	31659410	T>-	delins	910539926		by-frequency;by-alfa;by-cluster	2KB_upstream_variant;upstream_transcript_variant	SOD1	-:0.000005:1:GnomAD_exomes|-:0.000013:2:GnomAD_genomes|-:0.000038:10:TOPMED|TTT:0.:0:ALFA
21	31659681	G>A,C,T	snv	910580613		by-frequency;by-alfa;by-cluster	2KB_upstream_variant;upstream_transcript_variant	SOD1	A:0.000223:1:Estonian|A:0.00002:3:GnomAD_genomes|T:0.:0:ALFA
21	31664974	T>C	snv	910750155		by-frequency;by-alfa;by-cluster	500B_downstream_variant;intron_variant;downstream_transcript_variant	SOD1;LOC124900469	C:0.000013:2:GnomAD_genomes|C:0.:0:ALFA
21	31660279	G>C	snv	911483122		by-frequency;by-alfa	intron_variant	SOD1	C:0.000004:1:TOPMED|C:0.:0:ALFA
21	31658491	G>A	snv	912164575		by-frequency;by-alfa;by-cluster	2KB_upstream_variant;upstream_transcript_variant	SOD1	A:0.000007:1:GnomAD_genomes|A:0.000049:13:TOPMED|A:0.000071:1:ALFA
21	31663207	G>A,C	snv	912271243		by-frequency;by-alfa;by-cluster	intron_variant;2KB_upstream_variant;upstream_transcript_variant	SOD1;LOC124900469	A:0.000011:3:TOPMED|C:0.:0:ALFA
21	31666717	A>G	snv	912316885		by-frequency;by-cluster	intron_variant	SOD1	G:0.000007:3:GnomAD_exomes
21	31669207	A>G	snv	913046678		by-frequency;by-alfa;by-cluster	500B_downstream_variant;downstream_transcript_variant	SOD1	G:0.000074:11:GnomAD_genomes|G:0.000138:1:Korea4K|G:0.000072:19:TOPMED|G:0.:0:ALFA
21	31658165	T>A,G	snv	913377360		by-frequency;by-alfa;by-cluster	2KB_upstream_variant;upstream_transcript_variant	SOD1	G:0.000007:1:GnomAD_genomes|G:0.000011:3:TOPMED|G:0.:0:ALFA
21	31658385	A>T	snv	913412717			2KB_upstream_variant;upstream_transcript_variant	SOD1
21	31665219	G>T	snv	913582816		by-frequency;by-alfa;by-cluster	intron_variant	SOD1	T:0.00004:6:GnomAD_genomes|T:0.000026:7:TOPMED|T:0.000071:1:ALFA
21	31668135	C>T	snv	913937882		by-frequency;by-alfa;by-cluster	intron_variant	SOD1	T:0.000081:12:GnomAD_genomes|T:0.00011:29:TOPMED|T:0.000069:1:ALFA
21	31668337	A>G	snv	914000710		by-frequency;by-cluster	intron_variant	SOD1	G:0.000002:1:GnomAD_exomes
21	31662907	C>G,T	snv	914215417		by-frequency;by-alfa;by-cluster	intron_variant;2KB_upstream_variant;upstream_transcript_variant	SOD1;LOC124900469	G:0.000094:25:TOPMED|T:0.:0:ALFA
21	31668291	C>G	snv	914419199		by-frequency;by-alfa;by-cluster	intron_variant	SOD1	G:0.000013:2:GnomAD_genomes|G:0.000008:2:TOPMED|G:0.000071:1:ALFA
21	31664468	T>G	snv	914565559		by-frequency;by-alfa;by-cluster	non_coding_transcript_variant;intron_variant	SOD1;LOC124900469	G:0.000312:2:1000Genomes_30X|G:0.000072:1:GnomAD_exomes|G:0.000121:18:GnomAD_genomes|G:0.000321:85:TOPMED|G:0.000071:1:ALFA
21	31659532	G>T	snv	915103141		by-frequency;by-alfa;by-cluster	2KB_upstream_variant;upstream_transcript_variant	SOD1	T:0.000008:3:GnomAD_exomes|T:0.000007:1:GnomAD_genomes|T:0.000011:3:TOPMED|T:0.:0:ALFA
21	31659177	->GAA	delins	915163183		by-frequency;by-alfa	2KB_upstream_variant;upstream_transcript_variant	SOD1	AAG:0.000004:1:TOPMED|AAGAAGAA:0.:0:ALFA
21	31664455	C>G	snv	915200131		by-frequency;by-alfa;by-cluster	non_coding_transcript_variant;intron_variant	SOD1;LOC124900469	G:0.00002:3:GnomAD_genomes|G:0.000034:9:TOPMED|G:0.000071:1:ALFA
21	31661519	A>G	snv	915719398		by-frequency;by-alfa;by-cluster	intron_variant	SOD1	G:0.00006:9:GnomAD_genomes|G:0.000128:34:TOPMED|G:0.000071:1:ALFA
21	31659082	->A	ins	916266513		by-frequency;by-alfa;by-cluster	2KB_upstream_variant;upstream_transcript_variant	SOD1	A:0.000121:18:GnomAD_genomes|A:0.00011:29:TOPMED|A:0.000142:2:ALFA
21	31665970	G>T	snv	916288361		by-frequency;by-alfa;by-cluster	intron_variant	SOD1	T:0.001855:233:GnomAD_genomes|T:0.006734:4:NorthernSweden|T:0.002002:530:TOPMED|T:0.001794:32:ALFA
21	31663774	T>G	snv	916440275		by-frequency;by-alfa;by-cluster	2KB_upstream_variant;intron_variant;upstream_transcript_variant	SOD1;LOC124900469	G:0.000003:2:GnomAD_exomes|G:0.00003:8:TOPMED|G:0.:0:ALFA
21	31663416	A>G	snv	916508669		by-frequency;by-alfa	2KB_upstream_variant;intron_variant;upstream_transcript_variant	SOD1;LOC124900469	G:0.000004:1:TOPMED|G:0.:0:ALFA
21	31669241	A>G	snv	916616458		by-frequency;by-alfa;by-cluster	downstream_transcript_variant;500B_downstream_variant	SOD1	G:0.000007:1:GnomAD_genomes|G:0.000004:1:TOPMED|G:0.:0:ALFA
21	31669027	A>G	snv	916649732		by-frequency;by-alfa;by-cluster	downstream_transcript_variant;500B_downstream_variant	SOD1	G:0.00004:6:GnomAD_genomes|G:0.000276:2:Korea4K|G:0.000144:38:TOPMED|G:0.000071:1:ALFA
21	31661089	T>A	snv	917128241		by-frequency;by-alfa	intron_variant	SOD1	A:0.000019:5:TOPMED|A:0.:0:ALFA
21	31666612	T>G	snv	917284539		by-frequency;by-alfa;by-cluster	intron_variant	SOD1	G:0.000013:10:GnomAD_exomes|G:0.000026:7:TOPMED|G:0.000142:2:ALFA
21	31662772	T>A,C	snv	917397685		by-frequency;by-alfa;by-cluster	2KB_upstream_variant;intron_variant;upstream_transcript_variant	SOD1;LOC124900469	C:0.:0:ALFA
21	31662908	A>C,G	snv	917449898		by-frequency;by-alfa;by-cluster	2KB_upstream_variant;intron_variant;upstream_transcript_variant	SOD1;LOC124900469	C:0.00001:1:TOMMO|G:0.:0:ALFA
21	31669083	C>T	snv	917470947		by-frequency;by-alfa;by-cluster	downstream_transcript_variant;500B_downstream_variant	SOD1	T:0.000074:11:GnomAD_genomes|T:0.000087:23:TOPMED|T:0.000142:2:ALFA
21	31657830	C>T	snv	917972328		by-frequency;by-alfa	2KB_upstream_variant;upstream_transcript_variant	SOD1	T:0.000008:2:TOPMED|T:0.:0:ALFA
21	31658862	T>C	snv	918233942		by-frequency;by-alfa;by-cluster	2KB_upstream_variant;upstream_transcript_variant	SOD1	C:0.000027:4:GnomAD_genomes|C:0.000015:4:TOPMED|C:0.:0:ALFA
21	31663341	TAAAA>-	delins	918399626		by-frequency;by-alfa;by-cluster	2KB_upstream_variant;intron_variant;upstream_transcript_variant	SOD1;LOC124900469	-:0.000446:2:Estonian|-:0.000013:2:GnomAD_genomes|-:0.000138:1:Korea4K|-:0.000052:4:TOMMO|-:0.000023:6:TOPMED|AAAA:0.000216:4:ALFA
21	31663022	GAAA>-	delins	918438155		by-frequency;by-alfa	2KB_upstream_variant;intron_variant;upstream_transcript_variant	SOD1;LOC124900469	-:0.000008:2:TOPMED|AAA:0.:0:ALFA
21	31669194	AGAG>-,AG	delins	918502054		by-frequency;by-alfa;by-cluster	downstream_transcript_variant;500B_downstream_variant	SOD1	AG:0.:0:ALFA
21	31659071	C>A,T	snv	918896001		by-frequency;by-alfa;by-cluster	2KB_upstream_variant;upstream_transcript_variant	SOD1	T:0.000004:1:TOPMED|T:0.:0:ALFA
21	31664131	C>T	snv	919072223		by-frequency;by-alfa;by-cluster	2KB_upstream_variant;intron_variant;upstream_transcript_variant	SOD1;LOC124900469	T:0.000013:2:GnomAD_genomes|T:0.000026:7:TOPMED|T:0.:0:ALFA
21	31663968	C>G,T	snv	919188438		by-frequency;by-alfa;by-cluster	2KB_upstream_variant;intron_variant;upstream_transcript_variant	SOD1;LOC124900469	T:0.000002:2:GnomAD_exomes|T:0.000007:1:GnomAD_genomes|G:0.000013:1:TOMMO|T:0.:0:ALFA
21	31659537	C>T	snv	919299860		by-frequency;by-alfa;by-cluster	2KB_upstream_variant;upstream_transcript_variant	SOD1	T:0.000008:3:GnomAD_exomes|T:0.000013:2:GnomAD_genomes|T:0.000023:6:TOPMED|T:0.:0:ALFA
21	31664723	A>G	snv	919395804		by-frequency;by-alfa;by-cluster	downstream_transcript_variant;intron_variant;500B_downstream_variant	SOD1;LOC124900469	G:0.000081:12:GnomAD_genomes|G:0.000091:24:TOPMED|G:0.000142:2:ALFA
21	31661217	T>C	snv	919557079		by-frequency;by-alfa;by-cluster	intron_variant	SOD1	C:0.:0:ALFA
21	31666729	T>C	snv	919747901			intron_variant	SOD1
21	31659876	G>A	snv	920576064		by-frequency;by-alfa;by-cluster	intron_variant	SOD1	A:0.000007:1:GnomAD_genomes|A:0.000011:3:TOPMED|A:0.:0:ALFA
21	31662476	G>A,T	snv	921250009		by-frequency;by-alfa;by-cluster	2KB_upstream_variant;intron_variant;upstream_transcript_variant	SOD1;LOC124900469	A:0.000156:1:1000Genomes_30X|A:0.000151:40:TOPMED|T:0.:0:ALFA
21	31661511	G>A	snv	921302763		by-frequency;by-alfa;by-cluster	intron_variant	SOD1	A:0.000156:1:1000Genomes_30X|A:0.000013:2:GnomAD_genomes|A:0.000008:2:TOPMED|A:0.:0:ALFA
21	31662167	A>G	snv	921354516		by-frequency;by-alfa;by-cluster	intron_variant	SOD1	G:0.000034:5:GnomAD_genomes|G:0.000684:2:KOREAN|G:0.001092:2:Korea1K|G:0.001244:9:Korea4K|G:0.001253:97:TOMMO|G:0.000008:2:TOPMED|G:0.:0:ALFA
21	31667100	G>A	snv	921409797		by-frequency;by-alfa;by-cluster	intron_variant	SOD1	A:0.000011:3:TOPMED|A:0.:0:ALFA
21	31668359	A>C,T	snv	921417599		by-frequency;by-alfa;by-cluster	intron_variant	SOD1	C:0.000007:1:GnomAD_genomes|C:0.000011:3:TOPMED|C:0.000071:1:ALFA
21	31668153	C>T	snv	921535811		by-frequency;by-alfa;by-cluster	intron_variant	SOD1	T:0.000074:11:GnomAD_genomes|T:0.:0:ALFA
21	31659673	C>G,T	snv	922407156		by-frequency;by-alfa;by-cluster	2KB_upstream_variant;upstream_transcript_variant	SOD1	T:0.0000018:2:GnomAD_exomes|G:0.0000076:2:TOPMED|G:0.:0:ALFA
21	31659565	G>A	snv	922519202		by-frequency;by-alfa;by-cluster	2KB_upstream_variant;upstream_transcript_variant	SOD1	A:0.000005:2:GnomAD_exomes|A:0.000004:1:TOPMED|A:0.:0:ALFA
21	31660552	A>C	snv	922925353		by-frequency;by-alfa;by-cluster	intron_variant	SOD1	C:0.000013:2:GnomAD_genomes|C:0.000019:5:TOPMED|C:0.000071:1:ALFA
21	31663388	A>G	snv	923061307		by-frequency;by-alfa;by-cluster	2KB_upstream_variant;intron_variant;upstream_transcript_variant	SOD1;LOC124900469	G:0.000004:1:TOPMED|G:0.:0:ALFA
21	31658640	T>C	snv	923410667		by-frequency;by-alfa;by-cluster	2KB_upstream_variant;upstream_transcript_variant	SOD1	C:0.00002:3:GnomAD_genomes|C:0.000053:14:TOPMED|C:0.:0:ALFA
21	31666210	A>G	snv	923581133		by-frequency;by-alfa;by-cluster	intron_variant	SOD1	G:0.00004:6:GnomAD_genomes|G:0.000102:27:TOPMED|G:0.:0:ALFA
21	31660328	G>A	snv	923643445		by-frequency;by-alfa;by-cluster	intron_variant	SOD1	A:0.00002:3:GnomAD_genomes|A:0.00003:8:TOPMED|A:0.000071:1:ALFA
21	31658129	T>C	snv	924042390		by-frequency;by-alfa;by-cluster	2KB_upstream_variant;upstream_transcript_variant	SOD1	C:0.000007:1:GnomAD_genomes|C:0.000011:3:TOPMED|C:0.:0:ALFA
21	31660722	T>A,G	snv	924074105		by-frequency;by-alfa;by-cluster	intron_variant	SOD1	A:0.0002:1:Estonian|A:0.0002:1:ALFA
21	31660524	C>T	snv	924227417		by-cluster	intron_variant	SOD1
21	31668257	T>A	snv	924357532		by-frequency;by-alfa;by-cluster	intron_variant	SOD1	A:0.000007:1:GnomAD_genomes|A:0.000015:4:TOPMED|A:0.:0:ALFA
21	31664960	T>G	snv	924588132			downstream_transcript_variant;intron_variant;500B_downstream_variant	SOD1;LOC124900469
21	31660102	G>C	snv	924912906		by-frequency;by-alfa	intron_variant	SOD1	C:0.000019:5:TOPMED|C:0.:0:ALFA
21	31665883	G>T	snv	924971236		by-frequency;by-alfa	intron_variant	SOD1	T:0.000004:1:TOPMED|T:0.:0:ALFA
21	31665610	G>T	snv	925025108		by-frequency;by-alfa	intron_variant	SOD1	T:0.000008:2:TOPMED|T:0.:0:ALFA
21	31661565	T>C	snv	925339367		by-frequency;by-alfa;by-cluster	intron_variant	SOD1	C:0.000007:1:GnomAD_genomes|C:0.000026:7:TOPMED|C:0.000071:1:ALFA
21	31662538	TCACCATTACCTG>-	delins	925430904		by-frequency;by-alfa	2KB_upstream_variant;intron_variant;upstream_transcript_variant	SOD1;LOC124900469	-:0.000008:2:TOPMED|CACCATTACCTG:0.:0:ALFA
21	31661749	C>T	snv	925871611		by-frequency;by-alfa;by-cluster	intron_variant	SOD1	T:0.000007:1:GnomAD_genomes|T:0.000015:4:TOPMED|T:0.000071:1:ALFA
21	31661220	G>A	snv	925946018		by-frequency;by-alfa;by-cluster	intron_variant	SOD1	A:0.000013:2:GnomAD_genomes|A:0.000008:2:TOPMED|A:0.:0:ALFA
21	31666678	T>-	delins	926082360		by-frequency;by-alfa;by-cluster	intron_variant	SOD1	-:0.:0:GnomAD_exomes|-:0.00002:3:GnomAD_genomes|-:0.000026:7:TOPMED|TTT:0.000084:1:ALFA
21	31665022	G>A	snv	926256167		by-frequency;by-alfa;by-cluster	intron_variant	SOD1	A:0.00004:6:GnomAD_genomes|A:0.000015:4:TOPMED|A:0.:0:ALFA
21	31659414	G>A	snv	926380766		by-frequency;by-alfa;by-cluster	2KB_upstream_variant;upstream_transcript_variant	SOD1	A:0.000009:2:GnomAD_exomes|A:0.000007:1:GnomAD_genomes|A:0.000004:1:TOPMED|A:0.:0:ALFA
21	31659167	T>C	snv	926483630		by-frequency;by-alfa;by-cluster	2KB_upstream_variant;upstream_transcript_variant	SOD1	C:0.000007:1:GnomAD_genomes|C:0.000342:1:KOREAN|C:0.001562:121:TOMMO|C:0.:0:ALFA
21	31664381	A>G	snv	926538794		by-cluster	intron_variant;non_coding_transcript_variant	SOD1;LOC124900469
21	31661039	T>G	snv	927038386		by-frequency;by-alfa	intron_variant	SOD1	G:0.000023:6:TOPMED|G:0.:0:ALFA
21	31660756	C>T	snv	927120360		by-frequency;by-alfa;by-cluster	intron_variant	SOD1	T:0.00002:3:GnomAD_genomes|T:0.000038:10:TOPMED|T:0.:0:ALFA
21	31666243	G>A	snv	927256577		by-frequency;by-alfa;by-cluster	intron_variant	SOD1	A:0.000007:1:GnomAD_genomes|A:0.000004:1:TOPMED|A:0.:0:ALFA
21	31664101	A>C,G	snv	927877054		by-frequency;by-alfa;by-cluster	2KB_upstream_variant;intron_variant;upstream_transcript_variant	SOD1;LOC124900469	C:0.000007:1:GnomAD_genomes|G:0.:0:ALFA
21	31660237	G>T	snv	928060042		by-frequency;by-alfa;by-cluster	intron_variant	SOD1	T:0.00002:3:GnomAD_genomes|T:0.000019:5:TOPMED|T:0.000071:1:ALFA
21	31665377	C>A,T	snv	928170227		by-frequency;by-alfa	intron_variant	SOD1	T:0.:0:ALFA
21	31659992	->C	delins	928753718		by-frequency;by-alfa;by-cluster	intron_variant	SOD1	C:0.000004:2:GnomAD_exomes|C:0.000007:1:GnomAD_genomes|C:0.000004:1:TOPMED|CCCCCC:0.:0:ALFA
21	31665181	T>C	snv	928881925		by-frequency;by-alfa;by-cluster	intron_variant	SOD1	C:0.000027:4:GnomAD_genomes|C:0.00003:8:TOPMED|C:0.:0:ALFA
21	31659539	C>G,T	snv	929375150		by-frequency;by-alfa;by-cluster	2KB_upstream_variant;upstream_transcript_variant	SOD1	T:0.000003:1:GnomAD_exomes|G:0.000007:1:GnomAD_genomes|G:0.000015:4:TOPMED|G:0.:0:ALFA
21	31659689	G>A,C,T	snv	929380734		by-frequency;by-alfa;by-cluster	2KB_upstream_variant;upstream_transcript_variant	SOD1	A:0.000013:2:GnomAD_genomes|A:0.000052:4:TOMMO|A:0.000026:7:TOPMED|A:0.:0:ALFA
21	31659877	C>A,T	snv	929408677		by-frequency;by-cluster	intron_variant	SOD1	T:0.0000007:1:GnomAD_exomes
21	31664728	C>G,T	snv	929491973		by-frequency;by-alfa;by-cluster	downstream_transcript_variant;intron_variant;500B_downstream_variant	SOD1;LOC124900469	G:0.000027:4:GnomAD_genomes|T:0.000004:1:TOPMED|T:0.:0:ALFA
21	31665056	T>C	snv	929535373		by-frequency;by-alfa;by-cluster	intron_variant	SOD1	C:0.000004:1:TOPMED|C:0.:0:ALFA
21	31667425	A>G	snv	930300979		by-frequency;by-alfa;by-cluster	intron_variant	SOD1	G:0.0000048:5:GnomAD_exomes|G:0.0000076:2:TOPMED|G:0.:0:ALFA
21	31667163	T>G	snv	930354628		by-frequency;by-alfa	intron_variant	SOD1	G:0.000004:1:TOPMED|G:0.:0:ALFA
21	31660808	G>T	snv	931032273		by-frequency;by-alfa;by-cluster	intron_variant	SOD1	T:0.000067:10:GnomAD_genomes|T:0.000083:22:TOPMED|T:0.000071:1:ALFA
21	31661250	T>C,G	snv	931106741		by-frequency;by-alfa;by-cluster	intron_variant	SOD1	C:0.000007:1:GnomAD_genomes|C:0.000008:2:TOPMED|C:0.000094:1:ALFA
21	31666395	T>C	snv	931212861		by-frequency;by-alfa;by-cluster	intron_variant	SOD1	C:0.000004:1:TOPMED|C:0.:0:ALFA
21	31663026	AAA>-,A,AA,AAAA	delins	931231929		by-frequency;by-alfa;by-cluster	2KB_upstream_variant;intron_variant;upstream_transcript_variant	SOD1;LOC124900469	AAAAAAAA:0.:0:ALFA
21	31668990	C>G,T	snv	931312047		by-frequency;by-alfa;by-cluster	downstream_transcript_variant;500B_downstream_variant	SOD1	T:0.000028:1:GnomAD_exomes|T:0.000064:17:TOPMED|T:0.:0:ALFA
21	31668783	T>C	snv	931364210		by-frequency;by-alfa;by-cluster	3_prime_UTR_variant	SOD1	C:0.000003:1:GnomAD_exomes|C:0.00004:6:GnomAD_genomes|C:0.000045:12:TOPMED|C:0.000071:1:ALFA
21	31658212	A>C,G	snv	931626095		by-frequency;by-alfa;by-cluster	2KB_upstream_variant;upstream_transcript_variant	SOD1	C:0.00003:8:TOPMED|C:0.:0:ALFA
21	31663105	C>A,T	snv	931845405		by-frequency;by-alfa;by-cluster	2KB_upstream_variant;intron_variant;upstream_transcript_variant	SOD1;LOC124900469	A:0.000004:1:TOPMED|T:0.:0:ALFA
21	31658183	G>A	snv	932223596		by-frequency;by-alfa;by-cluster	2KB_upstream_variant;upstream_transcript_variant	SOD1	A:0.000027:4:GnomAD_genomes|A:0.000034:9:TOPMED|A:0.:0:ALFA
21	31668720	T>C	snv	932485579		by-frequency;by-alfa;by-cluster	3_prime_UTR_variant	SOD1	C:0.000002:1:GnomAD_exomes|C:0.000007:1:GnomAD_genomes|C:0.000015:4:TOPMED|C:0.:0:ALFA
21	31668323	T>C	snv	932560694		by-frequency;by-alfa;by-cluster	intron_variant	SOD1	C:0.000015:7:GnomAD_exomes|C:0.000007:1:GnomAD_genomes|C:0.000004:1:TOPMED|C:0.:0:ALFA
21	31662175	T>G	snv	932721310		by-frequency;by-alfa;by-cluster	intron_variant	SOD1	G:0.000013:2:GnomAD_genomes|G:0.000015:4:TOPMED|G:0.:0:ALFA
21	31668366	T>C	snv	932938559		by-frequency;by-alfa;by-cluster	intron_variant	SOD1	C:0.000004:1:TOPMED|C:0.:0:ALFA
21	31665656	G>T	snv	933220829		by-frequency;by-alfa	intron_variant	SOD1	T:0.000008:2:TOPMED|T:0.:0:ALFA
21	31659462	G>C	snv	933300195		by-frequency;by-alfa;by-cluster	2KB_upstream_variant;upstream_transcript_variant	SOD1	C:0.000468:3:1000Genomes_30X|C:0.000003:1:GnomAD_exomes|C:0.000047:7:GnomAD_genomes|G:0.5:1:SGDP_PRJ|C:0.000034:9:TOPMED|C:0.:0:ALFA
21	31659569	C>T	snv	933857599		by-frequency;by-alfa;by-cluster	2KB_upstream_variant;upstream_transcript_variant	SOD1	T:0.000086:37:GnomAD_exomes|T:0.000737:110:GnomAD_genomes|T:0.001001:265:TOPMED|T:0.000783:11:ALFA
21	31661289	T>C	snv	934110261		by-frequency;by-alfa;by-cluster	intron_variant	SOD1	C:0.000013:2:GnomAD_genomes|C:0.00003:8:TOPMED|C:0.:0:ALFA
21	31666908	A>G	snv	934208178		by-frequency;by-alfa;by-cluster	intron_variant	SOD1	G:0.000008:2:GnomAD_exomes|G:0.000011:3:TOPMED|G:0.:0:ALFA
21	31668272	G>T	snv	934451725		by-frequency;by-alfa;by-cluster	intron_variant	SOD1	T:0.000013:2:GnomAD_genomes|T:0.000019:5:TOPMED|T:0.:0:ALFA
21	31660336	G>C	snv	935007510		by-frequency;by-alfa;by-cluster	intron_variant	SOD1	C:0.000007:1:GnomAD_genomes|C:0.000011:3:TOPMED|C:0.000071:1:ALFA
21	31666035	G>A	snv	935050329		by-frequency;by-alfa;by-cluster	intron_variant	SOD1	A:0.000041:6:GnomAD_genomes|A:0.000169:2:ALFA
21	31665689	G>A	snv	935157906			intron_variant	SOD1
21	31659168	A>G	snv	935166297		by-frequency;by-alfa;by-cluster	2KB_upstream_variant;upstream_transcript_variant	SOD1	G:0.000007:1:GnomAD_genomes|G:0.000004:1:TOPMED|G:0.:0:ALFA
21	31658921	A>T	snv	935220064		by-frequency;by-alfa;by-cluster	2KB_upstream_variant;upstream_transcript_variant	SOD1	T:0.000007:1:GnomAD_genomes|T:0.000008:2:TOPMED|T:0.:0:ALFA
21	31662799	G>A	snv	935682465		by-frequency;by-alfa;by-cluster	2KB_upstream_variant;intron_variant;upstream_transcript_variant	SOD1;LOC124900469	A:0.000004:1:TOPMED|A:0.:0:ALFA
21	31661485	T>C	snv	935980953		by-frequency;by-alfa;by-cluster	intron_variant	SOD1	C:0.000027:4:GnomAD_genomes|C:0.00003:8:TOPMED|C:0.000071:1:ALFA
21	31661230	A>C	snv	936016099		by-frequency;by-alfa;by-cluster	intron_variant	SOD1	C:0.000007:1:GnomAD_genomes|C:0.000015:4:TOPMED|C:0.:0:ALFA
21	31657789	G>C	snv	936169916		by-frequency;by-alfa;by-cluster	2KB_upstream_variant;upstream_transcript_variant	SOD1	C:0.:0:ALFA
21	31666719	T>-,TT	delins	936181614		by-frequency;by-alfa;by-cluster	intron_variant	SOD1	-:0.000027:12:GnomAD_exomes|-:0.000011:3:TOPMED|TTT:0.:0:ALFA
21	31663037	T>C,G	snv	936220350		by-frequency;by-alfa;by-cluster	2KB_upstream_variant;intron_variant;upstream_transcript_variant	SOD1;LOC124900469	C:0.000156:1:1000Genomes_30X|C:0.000223:1:Estonian|C:0.00012:17:GnomAD_genomes|C:0.000013:1:TOMMO|G:0.000004:1:TOPMED|C:0.000054:1:ALFA
21	31667325	T>A,C,G	snv	936838632		by-frequency;by-cluster	missense_variant;coding_sequence_variant	SOD1	A:0.000009:7:GnomAD_exomes|C:0.000342:1:KOREAN
21	31662725	C>A,T	snv	936954702		by-frequency;by-alfa;by-cluster	2KB_upstream_variant;intron_variant;upstream_transcript_variant	SOD1;LOC124900469	T:0.000007:1:GnomAD_genomes|T:0.:0:ALFA
21	31660625	C>T	snv	937260926		by-frequency;by-alfa	intron_variant	SOD1	T:0.000004:1:TOPMED|T:0.:0:ALFA
21	31664164	G>A	snv	937339664		by-frequency;by-alfa;by-cluster	2KB_upstream_variant;intron_variant;upstream_transcript_variant	SOD1;LOC124900469	A:0.000007:1:GnomAD_genomes|A:0.000011:3:TOPMED|A:0.:0:ALFA
21	31659415	C>G	snv	937721440		by-frequency;by-alfa;by-cluster	2KB_upstream_variant;upstream_transcript_variant	SOD1	G:0.000004:1:GnomAD_exomes|G:0.000013:2:GnomAD_genomes|G:0.000038:10:TOPMED|G:0.:0:ALFA
21	31664430	G>C,T	snv	937921648		by-frequency;by-alfa;by-cluster	intron_variant;non_coding_transcript_variant	SOD1;LOC124900469	T:0.00003:1:GnomAD_exomes|T:0.000007:1:GnomAD_genomes|T:0.:0:ALFA
21	31662127	G>A,T	snv	938213469		by-frequency;by-alfa;by-cluster	intron_variant	SOD1	T:0.:0:ALFA
21	31661284	T>C	snv	938511522		by-frequency;by-alfa;by-cluster	intron_variant	SOD1	C:0.00004:6:GnomAD_genomes|C:0.00006:16:TOPMED|C:0.000071:1:ALFA
21	31660856	A>G	snv	938625564		by-frequency;by-alfa;by-cluster	intron_variant	SOD1	G:0.000004:1:TOPMED|G:0.:0:ALFA
21	31659709	C>G,T	snv	938894400		by-frequency;by-alfa;by-cluster	5_prime_UTR_variant	SOD1	T:0.:0:ALFA
21	31665183	T>A	snv	938966412		by-frequency;by-alfa	intron_variant	SOD1	A:0.000023:6:TOPMED|A:0.:0:ALFA
21	31665032	G>A	snv	939035028		by-frequency;by-alfa;by-cluster	intron_variant	SOD1	A:0.00002:3:GnomAD_genomes|A:0.000019:5:TOPMED|A:0.000071:1:ALFA
21	31665387	T>C	snv	939039763		by-frequency;by-alfa;by-cluster	intron_variant	SOD1	C:0.000312:2:1000Genomes_30X|C:0.00004:6:GnomAD_genomes|C:0.000026:7:TOPMED|C:0.:0:ALFA
21	31659917	G>C,T	snv	939513975		by-frequency;by-alfa;by-cluster	intron_variant	SOD1	T:0.000007:1:GnomAD_genomes|T:0.000011:3:TOPMED|T:0.:0:ALFA
21	31661806	C>T	snv	940155522		by-frequency;by-alfa;by-cluster	intron_variant	SOD1	T:0.000007:1:GnomAD_genomes|T:0.000013:1:TOMMO|T:0.000004:1:TOPMED|T:0.:0:ALFA
21	31661572	C>T	snv	940185703		by-frequency;by-alfa;by-cluster	intron_variant	SOD1	T:0.000007:1:GnomAD_genomes|T:0.000015:4:TOPMED|T:0.:0:ALFA
21	31662519	T>G	snv	940197412			2KB_upstream_variant;intron_variant;upstream_transcript_variant	SOD1;LOC124900469
21	31668760	A>G	snv	940249245		by-frequency;by-alfa;by-cluster	3_prime_UTR_variant	SOD1	G:0.000014:6:GnomAD_exomes|G:0.000013:2:GnomAD_genomes|G:0.000023:6:TOPMED|G:0.000071:1:ALFA
21	31667153	G>A,C,T	snv	940277948		by-frequency;by-alfa;by-cluster	intron_variant	SOD1	A:0.000067:10:GnomAD_genomes|T:0.:0:ALFA
21	31662193	T>A	snv	940314299			intron_variant	SOD1
21	31666831	A>G,T	snv	940694072		by-frequency;by-alfa;by-cluster	intron_variant	SOD1	T:0.:0:ALFA
21	31658749	T>C	snv	941704383		by-frequency;by-alfa;by-cluster	2KB_upstream_variant;upstream_transcript_variant	SOD1	C:0.000047:7:GnomAD_genomes|C:0.000019:5:TOPMED|C:0.:0:ALFA
21	31658433	C>T	snv	941803810		by-frequency;by-alfa;by-cluster	2KB_upstream_variant;upstream_transcript_variant	SOD1	T:0.000156:1:1000Genomes_30X|T:0.00006:9:GnomAD_genomes|T:0.000076:20:TOPMED|T:0.000071:1:ALFA
21	31663946	A>G	snv	941870776			2KB_upstream_variant;intron_variant;upstream_transcript_variant	SOD1;LOC124900469
21	31666029	T>C,G	snv	941967909		by-frequency;by-alfa;by-cluster	intron_variant	SOD1	G:0.000007:1:GnomAD_genomes|G:0.:0:ALFA
21	31660568	A>T	snv	942448552		by-frequency;by-alfa;by-cluster	intron_variant	SOD1	T:0.000013:2:GnomAD_genomes|T:0.000019:5:TOPMED|T:0.000071:1:ALFA
21	31666075	G>A	snv	942673258		by-frequency;by-alfa;by-cluster	intron_variant	SOD1	A:0.:0:ALFA
21	31660291	G>A	snv	942998478		by-frequency;by-alfa;by-cluster	intron_variant	SOD1	A:0.00006:9:GnomAD_genomes|A:0.00011:29:TOPMED|A:0.:0:ALFA
21	31665617	G>C	snv	943161376		by-frequency;by-alfa;by-cluster	intron_variant	SOD1	C:0.000007:1:GnomAD_genomes|C:0.000019:5:TOPMED|C:0.:0:ALFA
21	31659682	G>A,C,T	snv	943350860		by-frequency;by-alfa;by-cluster	2KB_upstream_variant;upstream_transcript_variant	SOD1	A:0.00007:1:ALFA
21	31659578	C>G,T	snv	943463734		by-frequency;by-alfa;by-cluster	2KB_upstream_variant;upstream_transcript_variant	SOD1	T:0.000073:33:GnomAD_exomes|T:0.000013:2:GnomAD_genomes|G:0.000013:1:TOMMO|T:0.000004:1:TOPMED|T:0.:0:ALFA
21	31658528	C>-	del	943662812		by-frequency;by-alfa;by-cluster	2KB_upstream_variant;upstream_transcript_variant	SOD1	-:0.00002:3:GnomAD_genomes|-:0.000011:3:TOPMED|-:0.:0:ALFA
21	31662759	AA>-	del	943878539		by-frequency;by-alfa	2KB_upstream_variant;intron_variant;upstream_transcript_variant	SOD1;LOC124900469	-:0.000004:1:TOPMED|-:0.:0:ALFA
21	31662141	A>G	snv	944016679		by-frequency;by-alfa;by-cluster	intron_variant	SOD1	G:0.000023:6:TOPMED|G:0.:0:ALFA
21	31668369	T>C	snv	944026802		by-frequency;by-alfa;by-cluster	intron_variant	SOD1	C:0.000007:4:GnomAD_exomes|C:0.00004:6:GnomAD_genomes|C:0.000064:17:TOPMED|C:0.:0:ALFA
21	31661791	G>A	snv	944132801		by-frequency;by-alfa;by-cluster	intron_variant	SOD1	A:0.000013:2:GnomAD_genomes|A:0.000008:2:TOPMED|A:0.:0:ALFA
21	31667728	G>A	snv	944329479		by-frequency;by-alfa;by-cluster	intron_variant	SOD1	A:0.000004:1:TOPMED|A:0.:0:ALFA
21	31664536	TG>-	del	944827491		by-frequency;by-alfa;by-cluster	downstream_transcript_variant;intron_variant;500B_downstream_variant	SOD1;LOC124900469	-:0.000027:4:GnomAD_genomes|-:0.000038:10:TOPMED|-:0.:0:ALFA
21	31664185	C>T	snv	944880055		by-frequency;by-alfa;by-cluster	2KB_upstream_variant;intron_variant;upstream_transcript_variant	SOD1;LOC124900469	T:0.000005:1:GnomAD_exomes|T:0.000007:1:GnomAD_genomes|T:0.000004:1:TOPMED|T:0.:0:ALFA
21	31665244	T>C	snv	945133252		by-frequency;by-alfa	intron_variant	SOD1	C:0.000004:1:TOPMED|C:0.:0:ALFA
21	31659210	C>T	snv	945260738		by-frequency;by-alfa;by-cluster	2KB_upstream_variant;upstream_transcript_variant	SOD1	T:0.000013:2:GnomAD_genomes|T:0.000023:6:TOPMED|T:0.:0:ALFA
21	31659435	C>G,T	snv	945340649		by-frequency;by-alfa;by-cluster	2KB_upstream_variant;upstream_transcript_variant	SOD1	G:0.00002:3:GnomAD_genomes|G:0.000008:2:TOPMED|T:0.:0:ALFA
21	31663335	T>C	snv	945689128			2KB_upstream_variant;intron_variant;upstream_transcript_variant	SOD1;LOC124900469
21	31663056	C>G	snv	945805554		by-frequency;by-alfa;by-cluster	2KB_upstream_variant;intron_variant;upstream_transcript_variant	SOD1;LOC124900469	G:0.000026:7:TOPMED|G:0.:0:ALFA
21	31661115	A>G	snv	945931398		by-frequency;by-alfa;by-cluster	intron_variant	SOD1	G:0.000223:1:Estonian|G:0.000013:2:GnomAD_genomes|G:0.000004:1:TOPMED|G:0.000061:1:ALFA
21	31669225	T>C	snv	946024351		by-frequency;by-alfa;by-cluster	downstream_transcript_variant;500B_downstream_variant	SOD1	C:0.00004:6:GnomAD_genomes|C:0.:0:KOREAN|C:0.000138:1:Korea4K|C:0.000336:26:TOMMO|C:0.000057:15:TOPMED|C:0.:0:ALFA
21	31666623	T>C	snv	946092560		by-frequency;by-alfa	intron_variant	SOD1	C:0.000008:2:TOPMED|C:0.:0:ALFA
21	31666336	C>T	snv	946175093		by-frequency;by-alfa;by-cluster	intron_variant	SOD1	T:0.00001:6:GnomAD_exomes|T:0.00002:3:GnomAD_genomes|T:0.000026:2:TOMMO|T:0.000008:2:TOPMED|T:0.:0:ALFA
21	31659403	T>C	snv	946650453		by-frequency;by-alfa;by-cluster	2KB_upstream_variant;upstream_transcript_variant	SOD1	C:0.000007:1:GnomAD_genomes|C:0.000015:4:TOPMED|C:0.:0:ALFA
21	31659187	G>A	snv	946664028		by-frequency;by-alfa;by-cluster	2KB_upstream_variant;upstream_transcript_variant	SOD1	A:0.00002:3:GnomAD_genomes|A:0.000008:2:TOPMED|A:0.:0:ALFA
21	31663960	G>A	snv	946863583		by-frequency;by-alfa;by-cluster	2KB_upstream_variant;intron_variant;upstream_transcript_variant	SOD1;LOC124900469	A:0.000006:6:GnomAD_exomes|A:0.000013:2:GnomAD_genomes|A:0.000011:3:TOPMED|A:0.:0:ALFA
21	31664705	G>A	snv	947372854		by-frequency;by-alfa;by-cluster	downstream_transcript_variant;intron_variant;500B_downstream_variant	SOD1;LOC124900469	A:0.00002:3:GnomAD_genomes|A:0.000011:3:TOPMED|A:0.000071:1:ALFA
21	31664508	A>C,T	snv	947489333		by-frequency;by-alfa;by-cluster	downstream_transcript_variant;intron_variant;500B_downstream_variant	SOD1;LOC124900469	T:0.000075:11:GnomAD_genomes|T:0.000342:1:KOREAN|T:0.000065:5:TOMMO|T:0.000038:10:TOPMED|T:0.:0:ALFA
21	31660083	C>T	snv	947601571		by-frequency;by-alfa;by-cluster	intron_variant	SOD1	T:0.00002:3:GnomAD_genomes|T:0.000008:2:TOPMED|T:0.:0:ALFA
21	31658874	C>A,T	snv	947846864		by-frequency;by-alfa;by-cluster	2KB_upstream_variant;upstream_transcript_variant	SOD1	A:0.000013:2:GnomAD_genomes|T:0.:0:ALFA
21	31658633	G>C	snv	947932675		by-frequency;by-alfa	2KB_upstream_variant;upstream_transcript_variant	SOD1	C:0.000004:1:TOPMED|C:0.:0:ALFA
21	31667218	G>A,T	snv	948150464		by-frequency;by-alfa;by-cluster	intron_variant	SOD1	A:0.000004:1:TOPMED|A:0.:0:ALFA
21	31661531	T>C	snv	948685823		by-frequency;by-alfa;by-cluster	intron_variant	SOD1	C:0.000101:15:GnomAD_genomes|C:0.000091:24:TOPMED|C:0.000071:1:ALFA
21	31664989	G>C,T	snv	948935184		by-frequency;by-alfa;by-cluster	intron_variant	SOD1	T:0.:0:ALFA
21	31659077	G>A	snv	949179731			2KB_upstream_variant;upstream_transcript_variant	SOD1
21	31657833	C>T	snv	949489474		by-frequency;by-alfa;by-cluster	2KB_upstream_variant;upstream_transcript_variant	SOD1	T:0.000027:4:GnomAD_genomes|T:0.000026:7:TOPMED|T:0.:0:ALFA
21	31662413	A>T	snv	949596398		by-frequency;by-alfa;by-cluster	2KB_upstream_variant;intron_variant;upstream_transcript_variant	SOD1;LOC124900469	T:0.000094:14:GnomAD_genomes|T:0.000079:21:TOPMED|T:0.:0:ALFA
21	31667850	A>C	snv	949803510		by-frequency;by-alfa;by-cluster	intron_variant	SOD1	C:0.00002:3:GnomAD_genomes|C:0.000008:2:TOPMED|C:0.:0:ALFA
21	31668817	A>C	snv	949872041		by-frequency;by-alfa;by-cluster	3_prime_UTR_variant	SOD1	C:0.000007:1:GnomAD_genomes|C:0.000004:1:TOPMED|C:0.:0:ALFA
21	31662530	C>T	snv	950280755		by-frequency;by-alfa;by-cluster	2KB_upstream_variant;intron_variant;upstream_transcript_variant	SOD1;LOC124900469	T:0.00006:9:GnomAD_genomes|T:0.000053:14:TOPMED|T:0.:0:ALFA
21	31659932	C>A,G,T	snv	950631215		by-frequency;by-alfa;by-cluster	intron_variant	SOD1	T:0.000007:1:GnomAD_genomes|T:0.000053:14:TOPMED|T:0.:0:ALFA
21	31660221	T>A	snv	950744885			intron_variant	SOD1
21	31660441	G>C	snv	951339771		by-frequency;by-alfa;by-cluster	intron_variant	SOD1	C:0.000027:4:GnomAD_genomes|C:0.000019:5:TOPMED|C:0.:0:ALFA
21	31660880	G>A	snv	951622454		by-frequency;by-alfa;by-cluster	intron_variant	SOD1	A:0.000013:2:GnomAD_genomes|A:0.000015:4:TOPMED|A:0.:0:ALFA
21	31662874	G>A	snv	952023762		by-frequency;by-alfa;by-cluster	2KB_upstream_variant;intron_variant;upstream_transcript_variant	SOD1;LOC124900469	A:0.000013:2:GnomAD_genomes|A:0.000004:1:TOPMED|A:0.:0:ALFA
21	31659326	A>G,T	snv	952291004		by-frequency;by-alfa;by-cluster	2KB_upstream_variant;upstream_transcript_variant	SOD1	G:0.000083:22:TOPMED|T:0.:0:ALFA
21	31667479	G>C	snv	952435527		by-frequency;by-alfa;by-cluster	intron_variant	SOD1	C:0.000017:12:GnomAD_exomes|C:0.000013:2:GnomAD_genomes|C:0.000013:1:TOMMO|C:0.000015:4:TOPMED|C:0.:0:ALFA
21	31661486	C>G	snv	952480852		by-frequency;by-alfa;by-cluster	intron_variant	SOD1	G:0.000156:1:1000Genomes_30X|G:0.000033:5:GnomAD_genomes|G:0.000121:32:TOPMED|G:0.:0:ALFA
21	31667053	A>G	snv	952548884		by-frequency;by-cluster	intron_variant	SOD1	G:0.000002:1:GnomAD_exomes
21	31669427	A>G	snv	952595540		by-frequency;by-alfa	downstream_transcript_variant;500B_downstream_variant	SOD1	G:0.000015:4:TOPMED|G:0.:0:ALFA
21	31669212	T>G	snv	952649241		by-frequency;by-alfa;by-cluster	downstream_transcript_variant;500B_downstream_variant	SOD1	G:0.000027:4:GnomAD_genomes|G:0.000015:4:TOPMED|G:0.:0:ALFA
21	31664090	C>T	snv	953161364		by-frequency;by-alfa;by-cluster	2KB_upstream_variant;intron_variant;upstream_transcript_variant	SOD1;LOC124900469	T:0.000004:1:TOPMED|T:0.:0:ALFA
21	31658922	A>G	snv	953506347		by-frequency;by-alfa;by-cluster	2KB_upstream_variant;upstream_transcript_variant	SOD1	G:0.000107:16:GnomAD_genomes|G:0.000162:43:TOPMED|G:0.000142:2:ALFA
21	31658673	A>G	snv	953623033		by-frequency;by-alfa;by-cluster	2KB_upstream_variant;upstream_transcript_variant	SOD1	G:0.00006:5:TOMMO|G:0.:0:ALFA
21	31663176	G>A,C,T	snv	953678011		by-frequency;by-alfa;by-cluster	2KB_upstream_variant;intron_variant;upstream_transcript_variant	SOD1;LOC124900469	A:0.000054:8:GnomAD_genomes|C:0.:0:ALFA
21	31662921	A>C	snv	953734383		by-frequency;by-alfa;by-cluster	2KB_upstream_variant;intron_variant;upstream_transcript_variant	SOD1;LOC124900469	C:0.000007:1:GnomAD_genomes|C:0.000004:1:TOPMED|C:0.:0:ALFA
21	31668902	G>C,T	snv	953857117		by-frequency;by-alfa;by-cluster	3_prime_UTR_variant	SOD1	C:0.00002:3:GnomAD_genomes|T:0.:0:ALFA
21	31662726	C>T	snv	954072211			2KB_upstream_variant;intron_variant;upstream_transcript_variant	SOD1;LOC124900469
21	31669014	G>A	snv	954099149		by-frequency;by-alfa;by-cluster	downstream_transcript_variant;500B_downstream_variant	SOD1	A:0.000041:1:GnomAD_exomes|A:0.000013:2:GnomAD_genomes|A:0.000038:10:TOPMED|A:0.000071:1:ALFA
21	31668730	C>A,T	snv	954213437		by-frequency;by-alfa;by-cluster	3_prime_UTR_variant	SOD1	A:0.00007:1:ALFA
21	31660729	AA>-,AAAA	delins	954339263		by-frequency;by-alfa	intron_variant	SOD1	-:0.000004:1:TOPMED|AAAAA:0.:0:ALFA
21	31665206	T>A	snv	954730633			intron_variant	SOD1
21	31664963	G>T	snv	954986778		by-frequency;by-alfa;by-cluster	downstream_transcript_variant;intron_variant;500B_downstream_variant	SOD1;LOC124900469	T:0.000007:1:GnomAD_genomes|T:0.000011:3:TOPMED|T:0.:0:ALFA
21	31662059	->T	delins	955341465		by-frequency;by-alfa	intron_variant	SOD1	T:0.000008:2:TOPMED|TTTTTTT:0.:0:ALFA
21	31665452	G>A,C	snv	955432417		by-frequency;by-alfa;by-cluster	intron_variant	SOD1	A:0.00001:1:TOMMO|C:0.:0:ALFA
21	31668654	A>C	snv	955759160		by-frequency;by-alfa;by-cluster	3_prime_UTR_variant	SOD1	C:0.000013:11:GnomAD_exomes|C:0.000027:4:GnomAD_genomes|C:0.000019:5:TOPMED|C:0.000071:1:ALFA
21	31662403	G>A	snv	955849145			2KB_upstream_variant;intron_variant;upstream_transcript_variant	SOD1;LOC124900469
21	31659374	G>C,T	snv	956486213		by-frequency;by-alfa;by-cluster	2KB_upstream_variant;upstream_transcript_variant	SOD1	T:0.000037:4:GnomAD_exomes|T:0.000013:2:GnomAD_genomes|T:0.:0:ALFA
21	31666237	G>C	snv	956510016			intron_variant	SOD1
21	31666665	A>C,G,T	snv	956578160		by-frequency;by-alfa;by-cluster	intron_variant	SOD1	G:0.000007:1:GnomAD_genomes|G:0.000004:1:TOPMED|G:0.:0:ALFA
21	31660732	G>A,C	snv	956969357		by-frequency;by-alfa;by-cluster	intron_variant	SOD1	C:0.000013:2:GnomAD_genomes|A:0.000013:1:TOMMO|C:0.000008:2:TOPMED|C:0.009434:2:Vietnamese|C:0.:0:ALFA
21	31669418	C>T	snv	957139878		by-frequency;by-alfa;by-cluster	downstream_transcript_variant;500B_downstream_variant	SOD1	T:0.000007:1:GnomAD_genomes|T:0.000414:32:TOMMO|T:0.000004:1:TOPMED|T:0.:0:ALFA
21	31662002	A>C	snv	957255905		by-frequency;by-alfa;by-cluster	intron_variant	SOD1	C:0.:0:GnomAD_genomes|C:0.000465:123:TOPMED|C:0.:0:ALFA
21	31658558	A>G	snv	957357192		by-frequency;by-alfa;by-cluster	2KB_upstream_variant;upstream_transcript_variant	SOD1	G:0.000013:2:GnomAD_genomes|G:0.000038:10:TOPMED|G:0.000142:2:ALFA
21	31667332	T>C	snv	957386804		by-frequency;by-alfa;by-cluster	missense_variant;coding_sequence_variant	SOD1	C:0.000001:1:GnomAD_exomes|C:0.000004:1:TOPMED|C:0.:0:ALFA
21	31658309	C>G,T	snv	957471899		by-frequency;by-alfa;by-cluster	2KB_upstream_variant;upstream_transcript_variant	SOD1	T:0.000007:1:GnomAD_genomes|T:0.:0:ALFA
21	31661747	C>A	snv	957512402		by-frequency;by-alfa;by-cluster	intron_variant	SOD1	A:0.000027:4:GnomAD_genomes|A:0.000023:6:TOPMED|A:0.000071:1:ALFA
21	31668104	T>A,C	snv	958145779		by-frequency;by-alfa;by-cluster	intron_variant	SOD1	C:0.00004:6:GnomAD_genomes|C:0.:0:ALFA
21	31658132	C>G	snv	958155737		by-frequency;by-alfa;by-cluster	2KB_upstream_variant;upstream_transcript_variant	SOD1	G:0.000013:2:GnomAD_genomes|G:0.000011:3:TOPMED|G:0.:0:ALFA
21	31662871	C>G,T	snv	958298338		by-frequency;by-alfa;by-cluster	2KB_upstream_variant;intron_variant;upstream_transcript_variant	SOD1;LOC124900469	T:0.000013:2:GnomAD_genomes|G:0.000004:1:TOPMED|T:0.:0:ALFA
21	31661083	G>A	snv	958495055		by-frequency;by-alfa;by-cluster	intron_variant	SOD1	A:0.000013:2:GnomAD_genomes|A:0.000011:3:TOPMED|A:0.:0:ALFA
21	31666848	T>C	snv	958858041		by-frequency;by-alfa;by-cluster	intron_variant	SOD1	C:0.00002:3:GnomAD_genomes|C:0.000049:13:TOPMED|C:0.:0:ALFA
21	31659637	G>A	snv	959011844		by-frequency;by-alfa;by-cluster	2KB_upstream_variant;upstream_transcript_variant	SOD1	A:0.000017:12:GnomAD_exomes|A:0.00004:6:GnomAD_genomes|A:0.000038:10:TOPMED|A:0.:0:ALFA
21	31657823	G>A	snv	959342420		by-frequency;by-alfa;by-cluster	2KB_upstream_variant;upstream_transcript_variant	SOD1	A:0.000007:1:GnomAD_genomes|A:0.000004:1:TOPMED|A:0.:0:ALFA
21	31662581	T>A	snv	959479818		by-frequency;by-alfa;by-cluster	2KB_upstream_variant;intron_variant;upstream_transcript_variant	SOD1;LOC124900469	A:0.000007:1:GnomAD_genomes|A:0.000015:4:TOPMED|A:0.:0:ALFA
21	31664669	A>T	snv	959582868		by-frequency;by-alfa;by-cluster	downstream_transcript_variant;intron_variant;500B_downstream_variant	SOD1;LOC124900469	T:0.00006:9:GnomAD_genomes|T:0.000087:23:TOPMED|T:0.:0:ALFA
21	31668212	A>G,T	snv	959599928		by-frequency;by-alfa;by-cluster	intron_variant	SOD1	T:0.000004:1:TOPMED|T:0.:0:ALFA
21	31661503	A>G	snv	959744081		by-frequency;by-alfa;by-cluster	intron_variant	SOD1	G:0.000008:2:TOPMED|G:0.:0:ALFA
21	31662383	T>G	snv	959769930		by-frequency;by-alfa;by-cluster	2KB_upstream_variant;intron_variant;upstream_transcript_variant	SOD1;LOC124900469	G:0.000027:4:GnomAD_genomes|G:0.000015:4:TOPMED|G:0.:0:ALFA
21	31667945	T>G	snv	959895810		by-frequency;by-alfa;by-cluster	intron_variant	SOD1	G:0.000013:2:GnomAD_genomes|G:0.000015:4:TOPMED|G:0.:0:ALFA
21	31659992	G>A,C,T	snv	960155187		by-frequency;by-alfa;by-cluster	intron_variant	SOD1	T:0.:0:ALFA
21	31660660	C>G,T	snv	960678003		by-frequency;by-alfa	intron_variant	SOD1	T:0.:0:ALFA
21	31660456	A>G	snv	960791765		by-frequency;by-alfa;by-cluster	intron_variant	SOD1	G:0.000007:1:GnomAD_genomes|G:0.000004:1:TOPMED|G:0.:0:ALFA
21	31665943	G>A	snv	961018225		by-frequency;by-alfa;by-cluster	intron_variant	SOD1	A:0.000014:2:GnomAD_genomes|A:0.000049:13:TOPMED|A:0.:0:ALFA
21	31657754	C>G	snv	961217738		by-frequency;by-alfa;by-cluster	2KB_upstream_variant;upstream_transcript_variant	SOD1	G:0.000013:2:GnomAD_genomes|G:0.000023:6:TOPMED|G:0.000071:1:ALFA
21	31662740	C>T	snv	961414696		by-frequency;by-alfa;by-cluster	2KB_upstream_variant;intron_variant;upstream_transcript_variant	SOD1;LOC124900469	T:0.000034:5:GnomAD_genomes|T:0.000038:10:TOPMED|T:0.:0:ALFA
21	31662900	A>G	snv	961466522		by-frequency;by-alfa;by-cluster	2KB_upstream_variant;intron_variant;upstream_transcript_variant	SOD1;LOC124900469	G:0.000312:2:1000Genomes_30X|G:0.000114:17:GnomAD_genomes|G:0.000144:38:TOPMED|G:0.000071:1:ALFA
21	31667714	T>G	snv	961537479		by-frequency;by-alfa;by-cluster	intron_variant	SOD1	G:0.00002:3:GnomAD_genomes|G:0.000072:19:TOPMED|G:0.:0:ALFA
21	31659035	G>C	snv	962207881		by-frequency;by-alfa;by-cluster	2KB_upstream_variant;upstream_transcript_variant	SOD1	C:0.000013:2:GnomAD_genomes|C:0.000011:3:TOPMED|C:0.:0:ALFA
21	31660202	C>G,T	snv	962959047		by-frequency;by-alfa;by-cluster	intron_variant	SOD1	T:0.00016:1:1000Genomes_30X|T:0.:0:ALFA
21	31664243	G>T	snv	963120479		by-frequency;by-alfa;by-cluster	2KB_upstream_variant;intron_variant;upstream_transcript_variant	SOD1;LOC124900469	T:0.000014:2:GnomAD_exomes|T:0.000007:1:GnomAD_genomes|T:0.000004:1:TOPMED|T:0.:0:ALFA
21	31666815	A>G	snv	963157639		by-frequency;by-alfa;by-cluster	intron_variant	SOD1	G:0.000013:2:GnomAD_genomes|G:0.000013:1:TOMMO|G:0.000011:3:TOPMED|G:0.:0:ALFA
21	31661023	G>A	snv	963388042		by-frequency;by-alfa	intron_variant	SOD1	A:0.000023:6:TOPMED|A:0.:0:ALFA
21	31659368	C>G	snv	963682480		by-frequency;by-alfa;by-cluster	2KB_upstream_variant;upstream_transcript_variant	SOD1	G:0.00003:3:GnomAD_exomes|G:0.000027:4:GnomAD_genomes|G:0.000045:12:TOPMED|G:0.000071:1:ALFA
21	31666720	T>G	snv	963808562		by-frequency;by-alfa;by-cluster	intron_variant	SOD1	G:0.000002:1:GnomAD_exomes|G:0.000007:1:GnomAD_genomes|G:0.000015:4:TOPMED|G:0.:0:ALFA
21	31659023	T>C	snv	963930583		by-frequency;by-alfa;by-cluster	2KB_upstream_variant;upstream_transcript_variant	SOD1	C:0.00004:6:GnomAD_genomes|C:0.000038:10:TOPMED|C:0.:0:ALFA
21	31667018	G>C	snv	964163693		by-frequency;by-alfa;by-cluster	intron_variant	SOD1	C:0.000008:2:TOPMED|C:0.:0:ALFA
21	31661456	C>T	snv	964301885		by-frequency;by-alfa;by-cluster	intron_variant	SOD1	T:0.000027:4:GnomAD_genomes|T:0.000045:12:TOPMED|T:0.000142:2:ALFA
21	31665900	G>A	snv	964415798		by-frequency;by-alfa	intron_variant	SOD1	A:0.000015:4:TOPMED|A:0.:0:ALFA
21	31660698	C>G,T	snv	964586954		by-frequency;by-alfa;by-cluster	intron_variant	SOD1	T:0.000008:2:TOPMED|T:0.:0:ALFA
21	31665282	T>A	snv	964735271		by-frequency;by-alfa;by-cluster	intron_variant	SOD1	A:0.000013:2:GnomAD_genomes|A:0.000023:6:TOPMED|A:0.000071:1:ALFA
21	31665462	T>C	snv	964787311		by-frequency;by-alfa;by-cluster	intron_variant	SOD1	C:0.000047:7:GnomAD_genomes|C:0.000064:17:TOPMED|C:0.000071:1:ALFA
21	31669394	->T	delins	965158933		by-frequency;by-alfa;by-cluster	downstream_transcript_variant;500B_downstream_variant	SOD1	T:0.000007:1:GnomAD_genomes|T:0.000008:2:TOPMED|TT:0.:0:ALFA
21	31669186	A>G	snv	965210691		by-frequency;by-alfa;by-cluster	downstream_transcript_variant;500B_downstream_variant	SOD1	G:0.000027:4:GnomAD_genomes|G:0.000038:10:TOPMED|G:0.:0:ALFA
21	31668655	C>A	snv	965517582		by-frequency;by-alfa;by-cluster	3_prime_UTR_variant	SOD1	A:0.000005:4:GnomAD_exomes|A:0.00004:6:GnomAD_genomes|A:0.000034:9:TOPMED|A:0.000142:2:ALFA
21	31662448	T>C	snv	965915894		by-frequency;by-alfa;by-cluster	2KB_upstream_variant;intron_variant;upstream_transcript_variant	SOD1;LOC124900469	C:0.000004:1:TOPMED|C:0.:0:ALFA
21	31659660	T>C	snv	966452334		by-frequency;by-alfa;by-cluster	2KB_upstream_variant;upstream_transcript_variant	SOD1	C:0.000331:322:GnomAD_exomes|C:0.000154:23:GnomAD_genomes|C:0.000147:39:TOPMED|C:0.000071:1:ALFA
21	31664927	T>G	snv	966589818			downstream_transcript_variant;intron_variant;500B_downstream_variant	SOD1;LOC124900469
21	31665187	T>A	snv	966640017			intron_variant	SOD1
21	31659547	C>T	snv	966943395		by-frequency;by-alfa;by-cluster	2KB_upstream_variant;upstream_transcript_variant	SOD1	T:0.000021:8:GnomAD_exomes|T:0.000034:5:GnomAD_genomes|T:0.000011:3:TOPMED|T:0.:0:ALFA
21	31664053	C>T	snv	967648475		by-frequency;by-alfa;by-cluster	2KB_upstream_variant;intron_variant;upstream_transcript_variant	SOD1;LOC124900469	T:0.000007:1:GnomAD_genomes|T:0.:0:ALFA
21	31667056	T>G	snv	967735071		by-frequency;by-alfa	intron_variant	SOD1	G:0.000008:2:TOPMED|G:0.:0:ALFA
21	31658638	C>A	snv	967829923		by-frequency;by-alfa;by-cluster	2KB_upstream_variant;upstream_transcript_variant	SOD1	A:0.000007:1:GnomAD_genomes|A:0.000004:1:TOPMED|A:0.:0:ALFA
21	31660506	A>G	snv	968243084		by-frequency;by-alfa;by-cluster	intron_variant	SOD1	G:0.00002:3:GnomAD_genomes|G:0.000049:13:TOPMED|G:0.:0:ALFA
21	31666176	G>C,T	snv	968259904		by-frequency;by-alfa;by-cluster	intron_variant	SOD1	C:0.000013:2:GnomAD_genomes|T:0.:0:ALFA
21	31659091	T>C	snv	969162150		by-frequency;by-alfa;by-cluster	2KB_upstream_variant;upstream_transcript_variant	SOD1	C:0.000007:1:GnomAD_genomes|C:0.000011:3:TOPMED|C:0.:0:ALFA
21	31664314	G>A	snv	969175414		by-frequency;by-alfa;by-cluster	intron_variant;non_coding_transcript_variant	SOD1;LOC124900469	A:0.000007:1:GnomAD_genomes|A:0.000008:2:TOPMED|A:0.:0:ALFA
21	31660478	C>T	snv	969254729		by-frequency;by-alfa;by-cluster	intron_variant	SOD1	T:0.00002:3:GnomAD_genomes|T:0.000038:10:TOPMED|T:0.:0:ALFA
21	31659351	C>T	snv	969490549		by-frequency;by-alfa;by-cluster	2KB_upstream_variant;upstream_transcript_variant	SOD1	T:0.000013:2:GnomAD_genomes|T:0.000011:3:TOPMED|T:0.:0:ALFA
21	31662033	G>A,T	snv	969800539		by-frequency;by-alfa;by-cluster	intron_variant	SOD1	A:0.000068:18:TOPMED|A:0.000071:1:ALFA
21	31659958	C>T	snv	970110765		by-frequency;by-alfa;by-cluster	intron_variant	SOD1	T:0.000004:3:GnomAD_exomes|T:0.00002:3:GnomAD_genomes|T:0.000011:3:TOPMED|T:0.:0:ALFA
21	31664320	A>G	snv	970530835		by-frequency;by-alfa;by-cluster	intron_variant;non_coding_transcript_variant	SOD1;LOC124900469	G:0.000004:1:TOPMED|G:0.:0:ALFA
21	31659393	G>A,C,T	snv	970783384		by-frequency;by-alfa;by-cluster	upstream_transcript_variant;2KB_upstream_variant	SOD1	A:0.000026:4:GnomAD_exomes|A:0.000027:4:GnomAD_genomes|A:0.000023:6:TOPMED|T:0.:0:ALFA
21	31662687	A>C,G	snv	970898090		by-frequency;by-alfa	upstream_transcript_variant;2KB_upstream_variant;intron_variant	SOD1;LOC124900469	G:0.:0:ALFA
21	31659513	G>A,C	snv	970918458		by-frequency;by-alfa;by-cluster	upstream_transcript_variant;2KB_upstream_variant	SOD1	A:0.000156:1:1000Genomes_30X|A:0.000013:2:GnomAD_genomes|A:0.000026:7:TOPMED|A:0.:0:ALFA
21	31669105	T>C,G	snv	971061488		by-frequency;by-alfa;by-cluster	500B_downstream_variant;downstream_transcript_variant	SOD1	G:0.:0:ALFA
21	31658074	T>A	snv	971354167			upstream_transcript_variant;2KB_upstream_variant	SOD1
21	31662941	G>C	snv	971586979		by-frequency;by-alfa;by-cluster	upstream_transcript_variant;2KB_upstream_variant;intron_variant	SOD1;LOC124900469	C:0.000047:7:GnomAD_genomes|C:0.000079:21:TOPMED|C:0.000142:2:ALFA
21	31664296	A>T	snv	971774440			upstream_transcript_variant;2KB_upstream_variant;intron_variant	SOD1;LOC124900469
21	31659037	C>T	snv	972275224		by-frequency;by-alfa;by-cluster	upstream_transcript_variant;2KB_upstream_variant	SOD1	T:0.000007:1:GnomAD_genomes|T:0.000077:6:TOMMO|T:0.000008:2:TOPMED|T:0.:0:ALFA
21	31658533	A>C,G	snv	972380022		by-frequency;by-alfa;by-cluster	upstream_transcript_variant;2KB_upstream_variant	SOD1	G:0.000013:2:GnomAD_genomes|C:0.000013:1:TOMMO|G:0.000023:6:TOPMED|G:0.:0:ALFA
21	31659369	A>C	snv	972697523			upstream_transcript_variant;2KB_upstream_variant	SOD1
21	31662906	T>C	snv	972779911			upstream_transcript_variant;2KB_upstream_variant;intron_variant	SOD1;LOC124900469
21	31663320	A>-	del	972925370		by-frequency;by-alfa;by-cluster	upstream_transcript_variant;2KB_upstream_variant;intron_variant	SOD1;LOC124900469	-:0.000027:4:GnomAD_genomes|-:0.000019:5:TOPMED|-:0.:0:ALFA
21	31661038	G>A,T	snv	973153410		by-frequency;by-alfa;by-cluster	intron_variant	SOD1	T:0.:0:ALFA
21	31666214	T>A	snv	973330239		by-frequency;by-alfa;by-cluster	intron_variant	SOD1	A:0.00002:3:GnomAD_genomes|A:0.000026:7:TOPMED|A:0.:0:ALFA
21	31669081	T>C	snv	973393033		by-frequency;by-alfa;by-cluster	500B_downstream_variant;downstream_transcript_variant	SOD1	C:0.00002:3:GnomAD_genomes|C:0.:0:ALFA
21	31665463	T>G	snv	973452902			intron_variant	SOD1
21	31660746	T>-,TT	delins	973590819		by-frequency;by-alfa;by-cluster	intron_variant	SOD1	TTTTT:0.:0:ALFA
21	31657764	C>T	snv	973946987		by-frequency;by-alfa;by-cluster	upstream_transcript_variant;2KB_upstream_variant	SOD1	T:0.000027:4:GnomAD_genomes|T:0.000026:7:TOPMED|T:0.:0:ALFA
21	31660208	C>A	snv	974002784			intron_variant	SOD1
21	31662116	G>C	snv	974215662		by-frequency;by-alfa;by-cluster	intron_variant	SOD1	C:0.000007:1:GnomAD_genomes|C:0.000004:1:TOPMED|C:0.:0:ALFA
21	31667392	->ATT	ins	974339634		by-frequency;by-alfa	intron_variant	SOD1	ATT:0.000004:1:TOPMED|ATT:0.:0:ALFA
21	31662360	A>G	snv	974542611		by-frequency;by-alfa	upstream_transcript_variant;2KB_upstream_variant;intron_variant	SOD1;LOC124900469	G:0.000004:1:TOPMED|G:0.:0:ALFA
21	31661187	C>T	snv	975124282		by-frequency;by-alfa;by-cluster	intron_variant	SOD1	T:0.000013:2:GnomAD_genomes|T:0.000019:5:TOPMED|T:0.:0:ALFA
21	31660775	T>C	snv	975449940			intron_variant	SOD1
21	31659528	G>A	snv	976047570		by-frequency;by-alfa;by-cluster	upstream_transcript_variant;2KB_upstream_variant	SOD1	A:0.000007:1:GnomAD_genomes|A:0.000019:5:TOPMED|A:0.:0:ALFA
21	31661457	A>C	snv	976057894			intron_variant	SOD1
21	31662152	A>G	snv	976709006		by-frequency;by-alfa;by-cluster	intron_variant	SOD1	G:0.:0:ALFA
21	31658407	T>C	snv	976772879			upstream_transcript_variant;2KB_upstream_variant	SOD1
21	31668668	A>C,T	snv	976796519		by-frequency;by-alfa;by-cluster	3_prime_UTR_variant	SOD1	T:0.000013:2:GnomAD_genomes|T:0.000011:3:TOPMED|T:0.:0:ALFA
21	31668347	C>A,G	snv	976968484		by-frequency;by-alfa;by-cluster	intron_variant	SOD1	A:0.000027:4:GnomAD_genomes|A:0.000026:7:TOPMED|A:0.000071:1:ALFA
21	31660548	T>G	snv	976993918		by-frequency;by-alfa;by-cluster	intron_variant	SOD1	G:0.000007:1:GnomAD_genomes|G:0.000023:6:TOPMED|G:0.:0:ALFA
21	31662459	G>A,C	snv	977169757		by-frequency;by-alfa;by-cluster	upstream_transcript_variant;2KB_upstream_variant;intron_variant	SOD1;LOC124900469	A:0.00016:1:1000Genomes_30X|C:0.:0:ALFA
21	31664709	C>G,T	snv	977386615		by-frequency;by-alfa;by-cluster	500B_downstream_variant;downstream_transcript_variant;intron_variant	SOD1;LOC124900469	G:0.000013:1:TOMMO|T:0.000004:1:TOPMED|T:0.:0:ALFA
21	31664931	T>A	snv	977438814			500B_downstream_variant;downstream_transcript_variant;intron_variant	SOD1;LOC124900469
21	31659549	C>T	snv	978069805		by-frequency;by-alfa;by-cluster	upstream_transcript_variant;2KB_upstream_variant	SOD1	T:0.000003:1:GnomAD_exomes|T:0.000008:2:TOPMED|T:0.:0:ALFA
21	31657874	C>T	snv	978238822		by-frequency;by-alfa;by-cluster	upstream_transcript_variant;2KB_upstream_variant	SOD1	T:0.000013:2:GnomAD_genomes|T:0.000015:4:TOPMED|T:0.:0:ALFA
21	31662417	C>G	snv	978367475		by-frequency;by-alfa;by-cluster	upstream_transcript_variant;2KB_upstream_variant;intron_variant	SOD1;LOC124900469	G:0.000013:2:GnomAD_genomes|G:0.000004:1:TOPMED|G:0.:0:ALFA
21	31661721	A>G	snv	978581223		by-cluster	intron_variant	SOD1
21	31666008	G>C,T	snv	979058084		by-frequency;by-alfa;by-cluster	intron_variant	SOD1	T:0.000447:2:Estonian|T:0.000418:55:GnomAD_genomes|C:0.000013:1:TOMMO|T:0.000551:9:ALFA
21	31660265	C>A	snv	979400886		by-frequency;by-alfa;by-cluster	intron_variant	SOD1	A:0.000007:1:GnomAD_genomes|A:0.000011:3:TOPMED|A:0.:0:ALFA
21	31660080	TGGCGGGAGCGCG>-	delins	979551397		by-frequency;by-alfa;by-cluster	intron_variant	SOD1	-:0.:0:GnomAD_genomes|-:0.000566:1:Korea1K|-:0.00014:1:Korea4K|-:0.000008:2:TOPMED|GCGCG:0.:0:ALFA
21	31669116	G>A	snv	979738508		by-frequency;by-alfa;by-cluster	500B_downstream_variant;downstream_transcript_variant	SOD1	A:0.000468:3:1000Genomes_30X|A:0.000302:45:GnomAD_genomes|A:0.00034:90:TOPMED|A:0.000142:2:ALFA
21	31669359	G>T	snv	979786218		by-frequency;by-alfa;by-cluster	500B_downstream_variant;downstream_transcript_variant	SOD1	T:0.00006:9:GnomAD_genomes|T:0.000083:22:TOPMED|T:0.000139:2:ALFA
21	31660508	G>A,C	snv	980128003		by-frequency;by-alfa;by-cluster	intron_variant	SOD1	C:0.000156:1:1000Genomes_30X|C:0.000208:31:GnomAD_genomes|C:0.:0:ALFA
21	31657743	G>A,C	snv	980143930		by-frequency;by-alfa;by-cluster	upstream_transcript_variant;2KB_upstream_variant	SOD1	C:0.000034:5:GnomAD_genomes|C:0.:0:ALFA
21	31658088	C>T	snv	980194886		by-frequency;by-alfa;by-cluster	upstream_transcript_variant;2KB_upstream_variant	SOD1	T:0.000051:7:GnomAD_genomes|T:0.000065:5:TOMMO|T:0.000068:18:TOPMED|T:0.:0:ALFA
21	31663272	G>A	snv	980306888		by-frequency;by-alfa;by-cluster	upstream_transcript_variant;2KB_upstream_variant;intron_variant	SOD1;LOC124900469	A:0.000156:1:1000Genomes_30X|A:0.000013:2:GnomAD_genomes|G:0.5:1:SGDP_PRJ|A:0.000019:5:TOPMED|A:0.:0:ALFA
21	31665176	T>A	snv	980311871		by-frequency;by-alfa;by-cluster	intron_variant	SOD1	A:0.000054:8:GnomAD_genomes|A:0.000546:1:Korea1K|A:0.000138:1:Korea4K|A:0.000026:2:TOMMO|A:0.:0:ALFA
21	31662984	C>T	snv	980637004		by-frequency;by-alfa;by-cluster	upstream_transcript_variant;2KB_upstream_variant;intron_variant	SOD1;LOC124900469	T:0.000047:7:GnomAD_genomes|T:0.000071:1:ALFA
21	31667639	C>G	snv	980741778			intron_variant	SOD1
21	31668077	A>G,T	snv	980792513		by-frequency;by-alfa;by-cluster	intron_variant	SOD1	T:0.:0:ALFA
21	31659082	T>C	snv	981815829		by-frequency;by-alfa;by-cluster	upstream_transcript_variant;2KB_upstream_variant	SOD1	C:0.000013:2:GnomAD_genomes|C:0.000015:4:TOPMED|C:0.:0:ALFA
21	31659354	A>G	snv	981857683		by-frequency;by-alfa;by-cluster	upstream_transcript_variant;2KB_upstream_variant	SOD1	G:0.000014:1:GnomAD_exomes|G:0.00002:3:GnomAD_genomes|G:0.00003:8:TOPMED|G:0.:0:ALFA
21	31664334	A>C	snv	981926325			intron_variant;non_coding_transcript_variant	SOD1;LOC124900469
21	31664081	A>T	snv	981984855		by-frequency;by-alfa;by-cluster	upstream_transcript_variant;2KB_upstream_variant;intron_variant	SOD1;LOC124900469	T:0.000027:4:GnomAD_genomes|T:0.000019:5:TOPMED|T:0.:0:ALFA
21	31664654	T>C	snv	982365346		by-cluster	500B_downstream_variant;downstream_transcript_variant;intron_variant	SOD1;LOC124900469
21	31667067	G>A	snv	982544838		by-frequency;by-alfa;by-cluster	intron_variant	SOD1	A:0.000009:4:GnomAD_exomes|A:0.000047:7:GnomAD_genomes|A:0.000094:25:TOPMED|A:0.000071:1:ALFA
21	31661488	C>G	snv	982588445		by-frequency;by-alfa;by-cluster	intron_variant	SOD1	G:0.000047:7:GnomAD_genomes|G:0.000023:6:TOPMED|G:0.000071:1:ALFA
21	31667482	C>T	snv	982597252		by-frequency;by-alfa;by-cluster	intron_variant	SOD1	T:0.000004:1:TOPMED|T:0.:0:ALFA
21	31661260	C>T	snv	982921235			intron_variant	SOD1
21	31666006	C>A,G	snv	983356690		by-frequency;by-alfa;by-cluster	intron_variant	SOD1	G:0.000022:3:GnomAD_genomes|A:0.000207:16:TOMMO|G:0.000019:5:TOPMED|G:0.000071:1:ALFA
21	31660231	C>T	snv	983532755		by-frequency;by-alfa;by-cluster	intron_variant	SOD1	T:0.000156:1:1000Genomes_30X|T:0.000074:11:GnomAD_genomes|T:0.000102:27:TOPMED|T:0.:0:ALFA
21	31665884	G>T	snv	983657548		by-frequency;by-alfa;by-cluster	intron_variant	SOD1	T:0.000007:1:GnomAD_genomes|T:0.000004:1:TOPMED|T:0.:0:ALFA
21	31666186	C>A,G	snv	983689973		by-frequency;by-alfa;by-cluster	intron_variant	SOD1	G:0.000007:1:GnomAD_genomes|A:0.000039:3:TOMMO|G:0.000004:1:TOPMED|G:0.:0:ALFA
21	31659074	G>-	del	983813088		by-frequency;by-alfa	upstream_transcript_variant;2KB_upstream_variant	SOD1	-:0.:0:ALFA
21	31658871	C>T	snv	983813761		by-frequency;by-alfa;by-cluster	upstream_transcript_variant;2KB_upstream_variant	SOD1	T:0.000027:4:GnomAD_genomes|T:0.00003:8:TOPMED|T:0.:0:ALFA
21	31664050	G>A,C	snv	983900138		by-frequency;by-alfa;by-cluster	upstream_transcript_variant;2KB_upstream_variant;intron_variant	SOD1;LOC124900469	A:0.00002:3:GnomAD_genomes|A:0.000011:3:TOPMED|A:0.:0:ALFA
21	31663758	A>C	snv	983947599		by-frequency;by-alfa;by-cluster	upstream_transcript_variant;2KB_upstream_variant;intron_variant	SOD1;LOC124900469	C:0.0000253:33:GnomAD_exomes|C:0.0000076:2:TOPMED|C:0.:0:ALFA
21	31669220	G>T	snv	984105834		by-frequency;by-alfa;by-cluster	500B_downstream_variant;downstream_transcript_variant	SOD1	T:0.00002:3:GnomAD_genomes|T:0.000015:4:TOPMED|T:0.000071:1:ALFA
21	31662511	C>T	snv	984205894		by-frequency;by-alfa;by-cluster	upstream_transcript_variant;2KB_upstream_variant;intron_variant	SOD1;LOC124900469	T:0.00004:6:GnomAD_genomes|T:0.000015:4:TOPMED|T:0.:0:ALFA
21	31669020	T>A	snv	984278646		by-frequency;by-alfa;by-cluster	500B_downstream_variant;downstream_transcript_variant	SOD1	A:0.000007:1:GnomAD_genomes|A:0.000011:3:TOPMED|A:0.:0:ALFA
21	31662734	G>A	snv	984491616		by-frequency;by-alfa;by-cluster	upstream_transcript_variant;2KB_upstream_variant;intron_variant	SOD1;LOC124900469	A:0.000007:1:GnomAD_genomes|A:0.000004:1:TOPMED|A:0.:0:ALFA
21	31659739	G>A	snv	984766079		by-frequency;by-alfa;by-cluster	5_prime_UTR_variant	SOD1	A:0.000007:1:GnomAD_genomes|A:0.000004:1:TOPMED|A:0.:0:ALFA
21	31664971	C>G,T	snv	984973299		by-frequency;by-alfa;by-cluster	500B_downstream_variant;downstream_transcript_variant;intron_variant	SOD1;LOC124900469	G:0.000188:28:GnomAD_genomes|G:0.000091:24:TOPMED|T:0.00463:1:Vietnamese|G:0.:0:ALFA
21	31663194	G>A,C	snv	985086378		by-frequency;by-alfa;by-cluster	upstream_transcript_variant;2KB_upstream_variant;intron_variant	SOD1;LOC124900469	C:0.:0:ALFA
21	31664096	C>T	snv	985775241		by-frequency;by-alfa;by-cluster	upstream_transcript_variant;2KB_upstream_variant;intron_variant	SOD1;LOC124900469	T:0.000027:4:GnomAD_genomes|T:0.000015:4:TOPMED|T:0.:0:ALFA
21	31663881	C>G,T	snv	986277034		by-cluster	upstream_transcript_variant;2KB_upstream_variant;coding_sequence_variant;missense_variant	SOD1;LOC124900469
21	31658696	A>G	snv	986367060		by-frequency;by-alfa;by-cluster	upstream_transcript_variant;2KB_upstream_variant	SOD1	G:0.:0:ALFA
21	31659672	G>A,C	snv	986370681		by-frequency;by-alfa;by-cluster	upstream_transcript_variant;2KB_upstream_variant	SOD1	A:0.00004:6:GnomAD_genomes|A:0.000023:6:TOPMED|C:0.:0:ALFA
21	31658965	T>C	snv	986420990		by-frequency;by-alfa;by-cluster	upstream_transcript_variant;2KB_upstream_variant	SOD1	C:0.000027:4:GnomAD_genomes|C:0.000011:3:TOPMED|C:0.:0:ALFA
21	31666699	G>A,C	snv	986450130		by-frequency;by-alfa;by-cluster	intron_variant	SOD1	A:0.000002:1:GnomAD_exomes|A:0.000034:5:GnomAD_genomes|A:0.000004:1:TOPMED|A:0.:0:ALFA
21	31661097	G>A	snv	987083783		by-frequency;by-alfa;by-cluster	intron_variant	SOD1	A:0.000008:2:TOPMED|A:0.000094:1:ALFA
21	31667131	T>C	snv	987425171		by-frequency;by-alfa;by-cluster	intron_variant	SOD1	C:0.000027:4:GnomAD_genomes|C:0.000019:5:TOPMED|C:0.:0:ALFA
21	31664969	A>C	snv	987565675		by-frequency;by-alfa;by-cluster	500B_downstream_variant;downstream_transcript_variant;intron_variant	SOD1;LOC124900469	C:0.000007:1:GnomAD_genomes|C:0.000011:3:TOPMED|C:0.:0:ALFA
21	31659512	G>-,GG,GGGGGG	delins	987925923		by-frequency;by-alfa;by-cluster	upstream_transcript_variant;2KB_upstream_variant	SOD1	GGGGGGG:0.:0:ALFA
21	31664437	T>A,G	snv	988106686		by-frequency;by-alfa;by-cluster	intron_variant;non_coding_transcript_variant	SOD1;LOC124900469	A:0.00003:1:GnomAD_exomes|G:0.:0:ALFA
21	31668116	A>G	snv	988242718		by-frequency;by-alfa;by-cluster	intron_variant	SOD1	G:0.000013:2:GnomAD_genomes|G:0.000026:7:TOPMED|G:0.000071:1:ALFA
21	31668308	T>G	snv	988515265		by-frequency;by-alfa;by-cluster	intron_variant	SOD1	G:0.000013:2:GnomAD_genomes|G:0.000011:3:TOPMED|G:0.:0:ALFA
21	31662086	T>C	snv	988714417		by-frequency;by-alfa;by-cluster	intron_variant	SOD1	C:0.000007:1:GnomAD_genomes|C:0.000011:3:TOPMED|C:0.:0:ALFA
21	31660241	C>G	snv	988919406		by-frequency;by-alfa;by-cluster	intron_variant	SOD1	G:0.00002:3:GnomAD_genomes|G:0.000004:1:TOPMED|G:0.:0:ALFA
21	31660068	G>C	snv	988986434		by-frequency;by-alfa;by-cluster	intron_variant	SOD1	C:0.000007:1:GnomAD_genomes|C:0.000004:1:TOPMED|C:0.:0:ALFA
21	31664879	G>A	snv	989274071		by-frequency;by-alfa;by-cluster	500B_downstream_variant;downstream_transcript_variant;intron_variant	SOD1;LOC124900469	A:0.000148:22:GnomAD_genomes|A:0.00014:37:TOPMED|A:0.:0:ALFA
21	31658151	T>C	snv	989655309		by-frequency;by-alfa;by-cluster	upstream_transcript_variant;2KB_upstream_variant	SOD1	T:0.5:1:SGDP_PRJ|C:0.000065:5:TOMMO|C:0.00003:8:TOPMED|C:0.000071:1:ALFA
21	31668862	A>C	snv	989824563		by-frequency;by-alfa;by-cluster	3_prime_UTR_variant	SOD1	C:0.000007:1:GnomAD_genomes|C:0.000004:1:TOPMED|C:0.:0:ALFA
21	31662731	A>C,G	snv	989830742		by-frequency;by-alfa;by-cluster	upstream_transcript_variant;2KB_upstream_variant;intron_variant	SOD1;LOC124900469	G:0.000004:1:TOPMED|G:0.:0:ALFA
21	31658349	C>T	snv	990223475			upstream_transcript_variant;2KB_upstream_variant	SOD1
21	31665576	G>A	snv	990525487		by-frequency;by-alfa;by-cluster	intron_variant	SOD1	A:0.000007:1:GnomAD_genomes|A:0.000008:2:TOPMED|A:0.:0:ALFA
21	31660462	C>A	snv	990851389		by-frequency;by-alfa;by-cluster	intron_variant	SOD1	A:0.000013:2:GnomAD_genomes|A:0.000019:5:TOPMED|A:0.000071:1:ALFA
21	31662649	A>G	snv	990925638		by-frequency;by-alfa;by-cluster	upstream_transcript_variant;2KB_upstream_variant;intron_variant	SOD1;LOC124900469	G:0.00002:3:GnomAD_genomes|G:0.000015:4:TOPMED|G:0.:0:ALFA
21	31660278	G>A,C,T	snv	990965932		by-frequency;by-alfa;by-cluster	intron_variant	SOD1	C:0.:0:ALFA
21	31662397	C>T	snv	990976440		by-frequency;by-alfa	upstream_transcript_variant;2KB_upstream_variant;intron_variant	SOD1;LOC124900469	T:0.000008:2:TOPMED|T:0.:0:ALFA
21	31657826	T>G	snv	991228660		by-frequency;by-alfa;by-cluster	upstream_transcript_variant;2KB_upstream_variant	SOD1	G:0.00004:6:GnomAD_genomes|G:0.000026:7:TOPMED|G:0.:0:ALFA
21	31665961	C>T	snv	991470774		by-frequency;by-alfa;by-cluster	intron_variant	SOD1	T:0.000007:1:GnomAD_genomes|T:0.:0:ALFA
21	31668215	TA>-	delins	991494824		by-frequency;by-alfa;by-cluster	intron_variant	SOD1	-:0.000067:10:GnomAD_genomes|-:0.000094:25:TOPMED|A:0.000071:1:ALFA
21	31664454	C>G	snv	991924856		by-frequency;by-alfa;by-cluster	intron_variant;non_coding_transcript_variant	SOD1;LOC124900469	G:0.00002:3:GnomAD_genomes|G:0.000042:11:TOPMED|G:0.:0:ALFA
21	31658067	G>T	snv	992059881		by-frequency;by-alfa;by-cluster	upstream_transcript_variant;2KB_upstream_variant	SOD1	T:0.000144:16:GnomAD_genomes|T:0.00014:37:TOPMED|T:0.000142:2:ALFA
21	31661702	C>T	snv	992526208		by-frequency;by-alfa;by-cluster	intron_variant	SOD1	T:0.000027:4:GnomAD_genomes|T:0.000013:1:TOMMO|T:0.000019:5:TOPMED|T:0.:0:ALFA
21	31661419	A>T	snv	992603105		by-frequency;by-alfa;by-cluster	intron_variant	SOD1	T:0.000013:2:GnomAD_genomes|T:0.000008:2:TOPMED|T:0.:0:ALFA
21	31666854	G>A,C	snv	992770112		by-frequency;by-alfa;by-cluster	intron_variant	SOD1	A:0.000004:1:GnomAD_exomes|A:0.000142:2:ALFA
21	31664808	C>T	snv	993130859		by-frequency;by-alfa;by-cluster	500B_downstream_variant;downstream_transcript_variant;intron_variant	SOD1;LOC124900469	T:0.000013:2:GnomAD_genomes|T:0.000008:2:TOPMED|T:0.:0:ALFA
21	31664626	G>C	snv	993244640			500B_downstream_variant;downstream_transcript_variant;intron_variant	SOD1;LOC124900469
21	31659507	G>A,C	snv	993790473		by-frequency;by-alfa;by-cluster	upstream_transcript_variant;2KB_upstream_variant	SOD1	A:0.000004:1:TOPMED|C:0.:0:ALFA
21	31664284	T>A	snv	993804843		by-frequency;by-alfa;by-cluster	upstream_transcript_variant;2KB_upstream_variant;intron_variant	SOD1;LOC124900469	A:0.000009:1:GnomAD_exomes|A:0.000047:7:GnomAD_genomes|A:0.000011:3:TOPMED|A:0.:0:ALFA
21	31669425	T>C	snv	994001124		by-frequency;by-alfa;by-cluster	500B_downstream_variant;downstream_transcript_variant	SOD1	C:0.000007:1:GnomAD_genomes|C:0.000004:1:TOPMED|C:0.:0:ALFA
21	31659605	C>G,T	snv	994078572		by-frequency;by-alfa;by-cluster	upstream_transcript_variant;2KB_upstream_variant	SOD1	G:0.000002:1:GnomAD_exomes|T:0.000004:1:TOPMED|T:0.:0:ALFA
21	31663625	C>T	snv	994136306			upstream_transcript_variant;2KB_upstream_variant;intron_variant	SOD1;LOC124900469
21	31663222	C>A	snv	994252057		by-cluster	upstream_transcript_variant;2KB_upstream_variant;intron_variant	SOD1;LOC124900469
21	31669308	G>A	snv	994316145		by-frequency;by-alfa;by-cluster	500B_downstream_variant;downstream_transcript_variant	SOD1	A:0.000221:33:GnomAD_genomes|A:0.000234:62:TOPMED|A:0.000214:3:ALFA
21	31666987	A>C	snv	994618008		by-frequency;by-alfa	intron_variant	SOD1	C:0.:0:ALFA
21	31665797	G>C,T	snv	994759400		by-frequency;by-alfa;by-cluster	intron_variant	SOD1	T:0.:0:ALFA
21	31661389	A>C	snv	994920575		by-frequency;by-alfa	intron_variant	SOD1	C:0.000004:1:TOPMED|C:0.:0:ALFA
21	31660584	T>C	snv	995359439			intron_variant	SOD1
21	31669298	A>G	snv	995456955		by-frequency;by-alfa;by-cluster	500B_downstream_variant;downstream_transcript_variant	SOD1	G:0.000223:1:Estonian|G:0.000395:59:GnomAD_genomes|A:0.5:2:SGDP_PRJ|A:0.5:1:Siberian|G:0.000019:5:TOPMED|G:0.000053:1:ALFA
21	31662797	G>A	snv	995867185		by-frequency;by-alfa;by-cluster	upstream_transcript_variant;2KB_upstream_variant;intron_variant	SOD1;LOC124900469	A:0.00002:3:GnomAD_genomes|A:0.000023:6:TOPMED|A:0.000071:1:ALFA
21	31660390	A>G,T	snv	995868632		by-frequency;by-alfa;by-cluster	intron_variant	SOD1	T:0.000054:8:GnomAD_genomes|T:0.:0:ALFA
21	31666778	G>A	snv	996228498		by-frequency;by-alfa;by-cluster	intron_variant	SOD1	A:0.000006:2:GnomAD_exomes|G:0.5:1:Siberian|A:0.000004:1:TOPMED|A:0.:0:ALFA
21	31662869	G>A	snv	996528516		by-frequency;by-alfa;by-cluster	upstream_transcript_variant;2KB_upstream_variant;intron_variant	SOD1;LOC124900469	A:0.000007:1:GnomAD_genomes|A:0.000004:1:TOPMED|A:0.:0:ALFA
21	31660101	A>C,G,T	snv	996631172		by-frequency;by-alfa;by-cluster	intron_variant	SOD1	T:0.000007:1:GnomAD_genomes|G:0.006392:18:KOREAN|A:0.5:2:Siberian|T:0.:0:ALFA
21	31661651	C>G,T	snv	997140925		by-frequency;by-alfa;by-cluster	intron_variant	SOD1	G:0.000007:1:GnomAD_genomes|G:0.000015:4:TOPMED|G:0.:0:ALFA
21	31660162	C>T	snv	997256526		by-frequency;by-alfa;by-cluster	intron_variant	SOD1	T:0.000027:4:GnomAD_genomes|T:0.000034:9:TOPMED|T:0.000071:1:ALFA
21	31658885	C>A,G,T	snv	997980830		by-frequency;by-alfa;by-cluster	upstream_transcript_variant;2KB_upstream_variant	SOD1	G:0.:0:ALFA
21	31669252	G>A	snv	998153059			500B_downstream_variant;downstream_transcript_variant	SOD1
21	31660708	->GAGT	delins	998362330		by-frequency;by-alfa;by-cluster	intron_variant	SOD1	GTGA:0.000114:17:GnomAD_genomes|GTGA:0.000147:39:TOPMED|GTGAGTGAGT:0.000214:3:ALFA
21	31667303	G>A	snv	998760030		by-frequency;by-alfa;by-cluster	coding_sequence_variant;synonymous_variant	SOD1	A:0.000013:2:GnomAD_genomes|A:0.000011:3:TOPMED|A:0.:0:ALFA
21	31662230	G>A	snv	998997005		by-frequency;by-alfa;by-cluster	intron_variant	SOD1	A:0.000007:1:GnomAD_genomes|A:0.000004:1:TOPMED|A:0.:0:ALFA
21	31665188	A>T	snv	999429446		by-frequency;by-alfa;by-cluster	intron_variant	SOD1	T:0.000156:1:1000Genomes_30X|T:0.00002:3:GnomAD_genomes|T:0.000019:5:TOPMED|T:0.:0:ALFA
21	31658648	G>A,C	snv	999477105		by-frequency;by-alfa;by-cluster	upstream_transcript_variant;2KB_upstream_variant	SOD1	C:0.000077:6:TOMMO|A:0.000015:4:TOPMED|A:0.000071:1:ALFA
21	31665450	C>T	snv	999481998		by-frequency;by-alfa;by-cluster	intron_variant	SOD1	T:0.000007:1:GnomAD_genomes|T:0.000008:2:TOPMED|T:0.:0:ALFA
21	31658380	A>-	delins	999531128		by-frequency;by-alfa;by-cluster	upstream_transcript_variant;2KB_upstream_variant	SOD1	-:0.000234:35:GnomAD_genomes|-:0.000196:52:TOPMED|AAAAAA:0.000142:2:ALFA
21	31663537	T>C	snv	999586292		by-frequency;by-alfa;by-cluster	upstream_transcript_variant;2KB_upstream_variant;intron_variant	SOD1;LOC124900469	C:0.000027:4:GnomAD_genomes|C:0.000019:5:TOPMED|C:0.:0:ALFA
21	31669072	A>G	snv	999691679		by-frequency;by-alfa;by-cluster	500B_downstream_variant;downstream_transcript_variant	SOD1	G:0.00002:3:GnomAD_genomes|G:0.000008:2:TOPMED|G:0.:0:ALFA
21	31662855	A>G	snv	999692387		by-frequency;by-alfa;by-cluster	upstream_transcript_variant;2KB_upstream_variant;intron_variant	SOD1;LOC124900469	G:0.00002:3:GnomAD_genomes|G:0.000015:4:TOPMED|G:0.:0:ALFA
21	31660127	C>A,T	snv	999707073		by-frequency;by-alfa;by-cluster	intron_variant	SOD1	A:0.0001:1:GnomAD_exomes|T:0.:0:ALFA
21	31668852	TT>-,TTT	delins	999744184		by-frequency;by-alfa;by-cluster	3_prime_UTR_variant	SOD1	T:0.000007:1:GnomAD_genomes|T:0.000277:2:Korea4K|T:0.001086:84:TOMMO|T:0.:0:ALFA
21	31663072	T>G	snv	1000042332		by-frequency;by-alfa;by-cluster	upstream_transcript_variant;2KB_upstream_variant;intron_variant	SOD1;LOC124900469	G:0.000014:2:GnomAD_genomes|G:0.000546:1:Korea1K|G:0.000008:2:TOPMED|G:0.:0:ALFA
21	31668243	T>C,G	snv	1000108530		by-frequency;by-alfa;by-cluster	intron_variant	SOD1	G:0.:0:ALFA
21	31666392	A>G,T	snv	1000379490		by-frequency;by-alfa;by-cluster	intron_variant	SOD1	T:0.000034:9:TOPMED|T:0.:0:ALFA
21	31666113	A>G	snv	1000430520		by-frequency;by-alfa	intron_variant	SOD1	G:0.000015:4:TOPMED|G:0.000169:2:ALFA
21	31661395	G>A,C	snv	1000994601		by-frequency;by-alfa;by-cluster	intron_variant	SOD1	A:0.000156:1:1000Genomes_30X|A:0.000034:5:GnomAD_genomes|A:0.000023:6:TOPMED|A:0.:0:ALFA
21	31666910	A>G	snv	1000996461		by-frequency;by-alfa;by-cluster	intron_variant	SOD1	G:0.000008:2:GnomAD_exomes|G:0.000013:1:TOMMO|G:0.000011:3:TOPMED|G:0.:0:ALFA
21	31666564	A>G	snv	1001102409			intron_variant	SOD1
21	31661032	G>A	snv	1001341759		by-frequency;by-alfa;by-cluster	intron_variant	SOD1	A:0.000034:5:GnomAD_genomes|A:0.000042:11:TOPMED|A:0.:0:ALFA
21	31660219	C>G,T	snv	1001545830		by-frequency;by-alfa;by-cluster	intron_variant	SOD1	G:0.00002:3:GnomAD_genomes|T:0.:0:ALFA
21	31665717	T>G	snv	1001643690		by-frequency;by-alfa;by-cluster	intron_variant	SOD1	G:0.00006:9:GnomAD_genomes|G:0.000053:14:TOPMED|G:0.000071:1:ALFA
21	31660436	A>G	snv	1001891577		by-frequency;by-alfa	intron_variant	SOD1	G:0.000004:1:TOPMED|G:0.:0:ALFA
21	31663638	G>A,C,T	snv	1002006227		by-frequency;by-alfa;by-cluster	upstream_transcript_variant;2KB_upstream_variant;intron_variant	SOD1;LOC124900469	T:0.000007:3:GnomAD_exomes|C:0.:0:ALFA
21	31658544	T>C	snv	1002055099		by-frequency;by-alfa;by-cluster	upstream_transcript_variant;2KB_upstream_variant	SOD1	C:0.000007:1:GnomAD_genomes|C:0.:0:ALFA
21	31658846	G>C	snv	1002107308		by-cluster	upstream_transcript_variant;2KB_upstream_variant	SOD1
21	31660617	T>C	snv	1002717419			intron_variant	SOD1
21	31659515	G>A,C	snv	1003162536		by-frequency;by-alfa;by-cluster	upstream_transcript_variant;2KB_upstream_variant	SOD1	A:0.000052:4:TOMMO|A:0.000026:7:TOPMED|A:0.:0:ALFA
21	31664849	C>G	snv	1003282821		by-cluster	500B_downstream_variant;downstream_transcript_variant;intron_variant	SOD1;LOC124900469
21	31664630	->T	delins	1003315766		by-frequency;by-alfa;by-cluster	500B_downstream_variant;downstream_transcript_variant;intron_variant	SOD1;LOC124900469	T:0.00004:6:GnomAD_genomes|T:0.000045:12:TOPMED|TTTTTTT:0.:0:ALFA
21	31664415	G>A,T	snv	1003368110		by-frequency;by-alfa;by-cluster	intron_variant;non_coding_transcript_variant	SOD1;LOC124900469	T:0.:0:ALFA
21	31665159	C>T	snv	1003744687		by-frequency;by-alfa;by-cluster	intron_variant	SOD1	T:0.000148:22:GnomAD_genomes|T:0.000264:70:TOPMED|T:0.000142:2:ALFA
21	31661671	A>G	snv	1003840576		by-frequency;by-alfa;by-cluster	intron_variant	SOD1	G:0.00004:6:GnomAD_genomes|G:0.000034:9:TOPMED|G:0.:0:ALFA
21	31667937	G>T	snv	1003953051		by-frequency;by-alfa;by-cluster	intron_variant	SOD1	T:0.000054:8:GnomAD_genomes|T:0.000091:24:TOPMED|T:0.:0:ALFA
21	31661903	T>C,G	snv	1004395705		by-frequency;by-alfa;by-cluster	intron_variant	SOD1	C:0.000034:5:GnomAD_genomes|G:0.:0:ALFA
21	31660449	G>A	snv	1004842658		by-frequency;by-alfa;by-cluster	intron_variant	SOD1	A:0.000007:1:GnomAD_genomes|A:0.000015:4:TOPMED|A:0.:0:ALFA
21	31664614	G>T	snv	1005228388		by-frequency;by-alfa;by-cluster	500B_downstream_variant;downstream_transcript_variant;intron_variant	SOD1;LOC124900469	T:0.000034:5:GnomAD_genomes|T:0.000053:14:TOPMED|T:0.000071:1:ALFA
21	31664312	T>G	snv	1005280828		by-frequency;by-alfa	intron_variant;non_coding_transcript_variant	SOD1;LOC124900469	G:0.000004:1:TOPMED|G:0.:0:ALFA
21	31666107	G>C	snv	1005364784		by-frequency;by-alfa;by-cluster	intron_variant	SOD1	C:0.000004:1:TOPMED|C:0.:0:ALFA
21	31662881	G>T	snv	1005565584		by-frequency;by-alfa;by-cluster	upstream_transcript_variant;2KB_upstream_variant;intron_variant	SOD1;LOC124900469	T:0.000011:3:TOPMED|T:0.:0:ALFA
21	31669294	A>G	snv	1005584397		by-frequency;by-cluster	500B_downstream_variant;downstream_transcript_variant	SOD1	G:0.000007:1:GnomAD_genomes
21	31658238	A>G	snv	1005949644		by-frequency;by-alfa;by-cluster	upstream_transcript_variant;2KB_upstream_variant	SOD1	G:0.000013:2:GnomAD_genomes|G:0.000138:1:Korea4K|G:0.00003:8:TOPMED|G:0.:0:ALFA
21	31657988	C>T	snv	1006065749			upstream_transcript_variant;2KB_upstream_variant	SOD1
21	31665688	T>C	snv	1006235670		by-frequency;by-alfa	intron_variant	SOD1	C:0.000004:1:TOPMED|C:0.:0:ALFA
21	31660381	A>G	snv	1006613725			intron_variant	SOD1
21	31669163	CTC>-	delins	1006652643		by-frequency;by-alfa;by-cluster	500B_downstream_variant;downstream_transcript_variant	SOD1	-:0.000127:19:GnomAD_genomes|-:0.000138:1:Korea4K|-:0.000168:13:TOMMO|-:0.000166:44:TOPMED|CCTC:0.000214:3:ALFA
21	31660191	G>C,T	snv	1006738435		by-frequency;by-alfa;by-cluster	intron_variant	SOD1	T:0.000004:1:TOPMED|T:0.:0:ALFA
21	31665763	T>G	snv	1007199498		by-cluster	intron_variant	SOD1
21	31665096	G>-	delins	1007407801		by-frequency;by-alfa	intron_variant	SOD1	-:0.000004:1:TOPMED|GG:0.:0:ALFA
21	31664859	G>A,T	snv	1007455376		by-frequency;by-alfa;by-cluster	500B_downstream_variant;downstream_transcript_variant;intron_variant	SOD1;LOC124900469	A:0.000047:7:GnomAD_genomes|A:0.000049:13:TOPMED|A:0.000071:1:ALFA
21	31659492	A>G	snv	1007626590		by-frequency;by-cluster	upstream_transcript_variant;2KB_upstream_variant	SOD1	G:0.000058:21:GnomAD_exomes
21	31664234	A>G	snv	1007650442		by-frequency;by-alfa;by-cluster	upstream_transcript_variant;2KB_upstream_variant;intron_variant	SOD1;LOC124900469	G:0.:0:ALFA
21	31659340	C>T	snv	1007739774		by-frequency;by-alfa;by-cluster	upstream_transcript_variant;2KB_upstream_variant	SOD1	T:0.000007:1:GnomAD_genomes|T:0.000008:2:TOPMED|T:0.:0:ALFA
21	31664618	T>G	snv	1007790399		by-frequency;by-alfa;by-cluster	500B_downstream_variant;downstream_transcript_variant;intron_variant	SOD1;LOC124900469	G:0.000114:17:GnomAD_genomes|G:0.000117:31:TOPMED|G:0.000142:2:ALFA
21	31662321	C>T	snv	1008124378		by-frequency;by-alfa;by-cluster	upstream_transcript_variant;2KB_upstream_variant;intron_variant	SOD1;LOC124900469	T:0.00004:6:GnomAD_genomes|T:0.00009:7:TOMMO|T:0.000011:3:TOPMED|T:0.:0:ALFA
21	31661623	A>G	snv	1008287203		by-frequency;by-alfa;by-cluster	intron_variant	SOD1	G:0.000007:1:GnomAD_genomes|G:0.000015:4:TOPMED|G:0.:0:ALFA
21	31658011	T>C	snv	1008376356		by-frequency;by-alfa;by-cluster	upstream_transcript_variant;2KB_upstream_variant	SOD1	C:0.000073:10:GnomAD_genomes|C:0.000026:7:TOPMED|C:0.:0:ALFA
21	31661449	C>T	snv	1008401832		by-frequency;by-alfa;by-cluster	intron_variant	SOD1	T:0.000007:1:GnomAD_genomes|T:0.000052:4:TOMMO|T:0.000004:1:TOPMED|T:0.:0:ALFA
21	31667648	T>C	snv	1008741627		by-frequency;by-alfa	intron_variant	SOD1	C:0.000008:2:TOPMED|C:0.:0:ALFA
21	31665455	T>C,G	snv	1008910913		by-frequency;by-alfa;by-cluster	intron_variant	SOD1	C:0.000027:4:GnomAD_genomes|G:0.:0:ALFA
21	31663981	T>G	snv	1009076673		by-frequency;by-alfa;by-cluster	upstream_transcript_variant;2KB_upstream_variant;intron_variant	SOD1;LOC124900469	G:0.000031:17:GnomAD_exomes|G:0.000013:2:GnomAD_genomes|G:0.001027:3:KOREAN|G:0.000546:1:Korea1K|G:0.000415:3:Korea4K|T:0.5:1:SGDP_PRJ|G:0.000129:10:TOMMO|G:0.000023:6:TOPMED|G:0.:0:ALFA
21	31664843	C>G	snv	1009412320		by-frequency;by-alfa;by-cluster	500B_downstream_variant;downstream_transcript_variant;intron_variant	SOD1;LOC124900469	G:0.000968:75:TOMMO|G:0.000004:1:TOPMED|G:0.:0:ALFA
21	31664642	G>A	snv	1009876715		by-frequency;by-alfa;by-cluster	500B_downstream_variant;downstream_transcript_variant;intron_variant	SOD1;LOC124900469	A:0.000013:2:GnomAD_genomes|A:0.000023:6:TOPMED|A:0.:0:ALFA
21	31662827	A>C	snv	1009964995		by-frequency;by-alfa;by-cluster	upstream_transcript_variant;2KB_upstream_variant;intron_variant	SOD1;LOC124900469	C:0.000007:1:GnomAD_genomes|C:0.000008:2:TOPMED|C:0.:0:ALFA
21	31662580	C>G,T	snv	1010081010		by-frequency;by-alfa;by-cluster	upstream_transcript_variant;2KB_upstream_variant;intron_variant	SOD1;LOC124900469	G:0.000004:1:TOPMED|G:0.:0:ALFA
21	31660670	A>G	snv	1010244791		by-frequency;by-alfa;by-cluster	intron_variant	SOD1	G:0.000013:2:GnomAD_genomes|G:0.000138:1:Korea4K|G:0.000008:2:TOPMED|G:0.:0:ALFA
21	31665417	A>T	snv	1010642845			intron_variant	SOD1
21	31659641	G>A	snv	1010694730		by-frequency;by-alfa;by-cluster	upstream_transcript_variant;2KB_upstream_variant	SOD1	A:0.000003:2:GnomAD_exomes|A:0.000013:2:GnomAD_genomes|A:0.000015:4:TOPMED|A:0.:0:ALFA
21	31665170	T>A	snv	1010758937		by-frequency;by-alfa;by-cluster	intron_variant	SOD1	A:0.00004:6:GnomAD_genomes|A:0.00006:16:TOPMED|A:0.000084:1:ALFA
21	31658958	A>G	snv	1010928929		by-frequency;by-alfa;by-cluster	upstream_transcript_variant;2KB_upstream_variant	SOD1	G:0.000013:1:TOMMO|G:0.000004:1:TOPMED|G:0.:0:ALFA
21	31658701	A>G	snv	1010984561		by-frequency;by-alfa	upstream_transcript_variant;2KB_upstream_variant	SOD1	G:0.000008:2:TOPMED|G:0.:0:ALFA
21	31663138	T>A	snv	1011135979		by-frequency;by-alfa;by-cluster	upstream_transcript_variant;2KB_upstream_variant;intron_variant	SOD1;LOC124900469	A:0.000156:1:1000Genomes_30X|A:0.000007:1:GnomAD_genomes|A:0.000008:2:TOPMED|A:0.:0:ALFA
21	31658584	G>A,T	snv	1012112950		by-frequency;by-alfa;by-cluster	upstream_transcript_variant;2KB_upstream_variant	SOD1	A:0.000034:5:GnomAD_genomes|A:0.000045:12:TOPMED|T:0.:0:ALFA
21	31660975	T>C	snv	1012213179		by-frequency;by-alfa;by-cluster	intron_variant	SOD1	C:0.000007:1:GnomAD_genomes|C:0.000004:1:TOPMED|C:0.:0:ALFA
21	31662815	C>T	snv	1012307518		by-frequency;by-alfa;by-cluster	upstream_transcript_variant;2KB_upstream_variant;intron_variant	SOD1;LOC124900469	T:0.000007:1:GnomAD_genomes|T:0.000008:2:TOPMED|T:0.:0:ALFA
21	31666122	C>T	snv	1012377153		by-frequency;by-alfa;by-cluster	intron_variant	SOD1	T:0.000013:2:GnomAD_genomes|T:0.000023:6:TOPMED|T:0.:0:ALFA
21	31668796	G>A	snv	1012821887		by-frequency;by-alfa;by-cluster	3_prime_UTR_variant	SOD1	A:0.000003:1:GnomAD_exomes|A:0.000007:1:GnomAD_genomes|A:0.000015:4:TOPMED|A:0.000071:1:ALFA
21	31659438	C>T	snv	1013157719		by-frequency;by-alfa	upstream_transcript_variant;2KB_upstream_variant	SOD1	T:0.000004:1:TOPMED|T:0.:0:ALFA
21	31659332	T>G	snv	1013625521		by-frequency;by-alfa;by-cluster	upstream_transcript_variant;2KB_upstream_variant	SOD1	G:0.000031:1:GnomAD_exomes|G:0.000034:5:GnomAD_genomes|G:0.000011:3:TOPMED|G:0.:0:ALFA
21	31662291	T>C,G	snv	1013885245		by-frequency;by-alfa;by-cluster	intron_variant	SOD1	C:0.000074:11:GnomAD_genomes|C:0.000071:1:ALFA
21	31661958	G>A	snv	1013928994		by-frequency;by-alfa	intron_variant	SOD1	A:0.000026:7:TOPMED|A:0.:0:ALFA
21	31661987	G>A,T	snv	1014000897		by-frequency;by-alfa;by-cluster	intron_variant	SOD1	T:0.000004:1:TOPMED|T:0.:0:ALFA
21	31668223	T>G	snv	1014107868			intron_variant	SOD1
21	31667989	T>C	snv	1014464295		by-frequency;by-alfa;by-cluster	intron_variant	SOD1	C:0.000021:3:GnomAD_genomes|C:0.000026:7:TOPMED|C:0.:0:ALFA
21	31660962	C>T	snv	1014572591		by-frequency;by-alfa	intron_variant	SOD1	T:0.000004:1:TOPMED|T:0.:0:ALFA
21	31666767	A>G	snv	1014685647		by-frequency;by-alfa;by-cluster	intron_variant	SOD1	G:0.000016:6:GnomAD_exomes|G:0.000004:1:TOPMED|G:0.:0:ALFA
21	31658005	G>T	snv	1014720447		by-frequency;by-alfa;by-cluster	upstream_transcript_variant;2KB_upstream_variant	SOD1	T:0.000007:1:GnomAD_genomes|T:0.000004:1:TOPMED|T:0.:0:ALFA
21	31666521	A>G	snv	1014736600		by-frequency;by-alfa;by-cluster	intron_variant	SOD1	G:0.0000007:1:GnomAD_exomes|G:0.0000134:2:GnomAD_genomes|G:0.0000264:7:TOPMED|G:0.0000329:1:ALFA
21	31661697	C>T	snv	1015182729		by-frequency;by-alfa;by-cluster	intron_variant	SOD1	T:0.000054:8:GnomAD_genomes|T:0.00003:8:TOPMED|T:0.:0:ALFA
21	31658244	C>G	snv	1015183569			upstream_transcript_variant;2KB_upstream_variant	SOD1
21	31661904	C>T	snv	1015234918		by-frequency;by-alfa;by-cluster	intron_variant	SOD1	T:0.000015:4:TOPMED|T:0.:0:ALFA
21	31667525	G>A,C	snv	1015405722		by-frequency;by-alfa;by-cluster	intron_variant	SOD1	A:0.000027:4:GnomAD_genomes|A:0.000342:1:KOREAN|A:0.000013:1:TOMMO|A:0.000042:11:TOPMED|A:0.:0:ALFA
21	31664622	G>A,T	snv	1015911637		by-frequency;by-alfa;by-cluster	500B_downstream_variant;downstream_transcript_variant;intron_variant	SOD1;LOC124900469	A:0.000013:2:GnomAD_genomes|A:0.000019:5:TOPMED|T:0.:0:ALFA
21	31665170	T>-,TT	delins	1016414897		by-frequency;by-alfa;by-cluster	intron_variant	SOD1	TTTTTTTT:0.:0:ALFA
21	31659952	A>C,G	snv	1016657598		by-frequency;by-alfa;by-cluster	intron_variant	SOD1	G:0.000004:1:TOPMED|G:0.:0:ALFA
21	31659343	A>G	snv	1016806032		by-frequency;by-alfa;by-cluster	upstream_transcript_variant;2KB_upstream_variant	SOD1	G:0.000013:2:GnomAD_genomes|G:0.000019:5:TOPMED|G:0.:0:ALFA
21	31662888	G>A,T	snv	1016868850		by-frequency;by-alfa;by-cluster	upstream_transcript_variant;2KB_upstream_variant;intron_variant	SOD1;LOC124900469	A:0.000015:4:TOPMED|A:0.:0:ALFA
21	31663215	C>A	snv	1016921132		by-frequency;by-alfa;by-cluster	upstream_transcript_variant;2KB_upstream_variant;intron_variant	SOD1;LOC124900469	A:0.000076:11:GnomAD_genomes|A:0.:0:ALFA
21	31669295	T>C	snv	1017142255		by-frequency;by-alfa;by-cluster	500B_downstream_variant;downstream_transcript_variant	SOD1	C:0.:0:ALFA
21	31665102	A>T	snv	1017477455		by-frequency;by-alfa;by-cluster	intron_variant	SOD1	T:0.000007:1:GnomAD_genomes|T:0.000008:2:TOPMED|T:0.:0:ALFA
21	31664877	A>G	snv	1017529804		by-frequency;by-alfa;by-cluster	500B_downstream_variant;downstream_transcript_variant;intron_variant	SOD1;LOC124900469	G:0.000034:5:GnomAD_genomes|G:0.000026:7:TOPMED|G:0.:0:ALFA
21	31661368	A>G	snv	1017623179		by-frequency;by-alfa;by-cluster	intron_variant	SOD1	G:0.000007:1:GnomAD_genomes|G:0.000015:4:TOPMED|G:0.:0:ALFA
21	31665764	A>G	snv	1017640293		by-frequency;by-alfa;by-cluster	intron_variant	SOD1	G:0.000013:2:GnomAD_genomes|G:0.000008:2:TOPMED|G:0.:0:ALFA
21	31665458	C>G	snv	1017998426			intron_variant	SOD1
21	31660194	C>T	snv	1018094073		by-frequency;by-alfa;by-cluster	intron_variant	SOD1	T:0.000008:2:TOPMED|T:0.:0:ALFA
21	31666394	G>A,C	snv	1018482044		by-frequency;by-alfa;by-cluster	intron_variant	SOD1	C:0.000013:2:GnomAD_genomes|C:0.000011:3:TOPMED|C:0.:0:ALFA
21	31662621	G>A	snv	1018760006		by-frequency;by-alfa;by-cluster	upstream_transcript_variant;2KB_upstream_variant;intron_variant	SOD1;LOC124900469	A:0.000007:1:GnomAD_genomes|A:0.000004:1:TOPMED|A:0.:0:ALFA
21	31662447	A>G	snv	1018875035		by-frequency;by-alfa;by-cluster	upstream_transcript_variant;2KB_upstream_variant;intron_variant	SOD1;LOC124900469	G:0.:0:GnomAD_genomes|G:0.000013:1:TOMMO|G:0.000019:5:TOPMED|G:0.:0:ALFA
21	31660543	C>T	snv	1018893905		by-frequency;by-alfa;by-cluster	intron_variant	SOD1	T:0.00004:6:GnomAD_genomes|T:0.000342:1:KOREAN|T:0.000023:6:TOPMED|T:0.000071:1:ALFA
21	31659032	T>C	snv	1019109362		by-frequency;by-alfa;by-cluster	upstream_transcript_variant;2KB_upstream_variant	SOD1	C:0.00002:3:GnomAD_genomes|C:0.000011:3:TOPMED|C:0.:0:ALFA
21	31663671	T>C	snv	1019228388		by-frequency;by-alfa;by-cluster	upstream_transcript_variant;2KB_upstream_variant;intron_variant	SOD1;LOC124900469	C:0.000041:24:GnomAD_exomes|C:0.00004:6:GnomAD_genomes|C:0.000057:15:TOPMED|C:0.:0:ALFA
21	31667443	A>C,T	snv	1019732764		by-frequency;by-alfa;by-cluster	intron_variant	SOD1	T:0.000007:1:GnomAD_genomes|T:0.000004:1:TOPMED|T:0.:0:ALFA
21	31661450	G>A	snv	1019769664		by-frequency;by-alfa;by-cluster	intron_variant	SOD1	A:0.000156:1:1000Genomes_30X|A:0.000223:1:Estonian|A:0.00004:6:GnomAD_genomes|A:0.001027:3:KOREAN|A:0.000553:4:Korea4K|A:0.001253:97:TOMMO|A:0.000011:3:TOPMED|A:0.000054:1:ALFA
21	31669183	TAT>-	delins	1019844039		by-frequency;by-alfa;by-cluster	500B_downstream_variant;downstream_transcript_variant	SOD1	-:0.000047:7:GnomAD_genomes|-:0.000125:33:TOPMED|AT:0.000214:3:ALFA
21	31661134	A>G	snv	1019884861			intron_variant	SOD1
21	31660458	TT>-	delins	1020399772		by-frequency;by-alfa;by-cluster	intron_variant	SOD1	-:0.00002:3:GnomAD_genomes|-:0.00003:8:TOPMED|T:0.:0:ALFA
21	31664039	C>T	snv	1020443974		by-frequency;by-alfa;by-cluster	upstream_transcript_variant;2KB_upstream_variant;intron_variant	SOD1;LOC124900469	T:0.000223:1:Estonian|T:0.00006:9:GnomAD_genomes|T:0.000013:1:TOMMO|T:0.000045:12:TOPMED|T:0.000108:2:ALFA
21	31660246	G>C	snv	1020453616		by-frequency;by-alfa	intron_variant	SOD1	C:0.000004:1:TOPMED|C:0.:0:ALFA
21	31666102	G>T	snv	1020490439		by-frequency;by-alfa	intron_variant	SOD1	T:0.000008:2:TOPMED|T:0.:0:ALFA
21	31663731	G>A,C	snv	1020558560		by-frequency;by-alfa;by-cluster	upstream_transcript_variant;2KB_upstream_variant;intron_variant	SOD1;LOC124900469	A:0.000094:14:GnomAD_genomes|A:0.000151:40:TOPMED|A:0.:0:ALFA
21	31668960	G>C	snv	1020986306		by-frequency;by-alfa;by-cluster	500B_downstream_variant;downstream_transcript_variant	SOD1	C:0.000101:15:GnomAD_genomes|C:0.000136:36:TOPMED|C:0.000071:1:ALFA
21	31668885	A>G	snv	1021782333		by-frequency;by-alfa;by-cluster	3_prime_UTR_variant	SOD1	G:0.00002:3:GnomAD_genomes|G:0.000042:11:TOPMED|G:0.:0:ALFA
21	31659512	G>A,T	snv	1022119176		by-frequency;by-alfa;by-cluster	upstream_transcript_variant;2KB_upstream_variant	SOD1	A:0.000008:3:GnomAD_exomes|T:0.000013:2:GnomAD_genomes|T:0.:0:ALFA
21	31664644	A>T	snv	1022216645		by-frequency;by-alfa	500B_downstream_variant;downstream_transcript_variant;intron_variant	SOD1;LOC124900469	T:0.000004:1:TOPMED|T:0.:0:ALFA
21	31659648	G>T	snv	1022455366		by-cluster	upstream_transcript_variant;2KB_upstream_variant	SOD1
21	31668231	T>C	snv	1022786760		by-frequency;by-alfa;by-cluster	intron_variant	SOD1	C:0.000156:1:1000Genomes_30X|C:0.0001:15:GnomAD_genomes|C:0.000151:40:TOPMED|C:0.000071:1:ALFA
21	31668056	C>A	snv	1022895603		by-frequency;by-alfa;by-cluster	intron_variant	SOD1	A:0.000027:4:GnomAD_genomes|A:0.000023:6:TOPMED|A:0.:0:ALFA
21	31659348	T>G	snv	1023284765		by-frequency;by-alfa;by-cluster	upstream_transcript_variant;2KB_upstream_variant	SOD1	G:0.000013:2:GnomAD_genomes|G:0.000023:6:TOPMED|G:0.:0:ALFA
21	31664313	T>C	snv	1023390212		by-frequency;by-alfa;by-cluster	intron_variant;non_coding_transcript_variant	SOD1;LOC124900469	C:0.000154:23:GnomAD_genomes|C:0.000147:39:TOPMED|C:0.000214:3:ALFA
21	31664071	G>C	snv	1023443938		by-frequency;by-alfa;by-cluster	upstream_transcript_variant;2KB_upstream_variant;intron_variant	SOD1;LOC124900469	C:0.000027:4:GnomAD_genomes|C:0.000015:4:TOPMED|C:0.:0:ALFA
21	31666128	C>T	snv	1023900593		by-frequency;by-alfa;by-cluster	intron_variant	SOD1	T:0.00002:3:GnomAD_genomes|T:0.000004:1:TOPMED|T:0.:0:ALFA
21	31661018	G>T	snv	1024020584		by-frequency;by-alfa;by-cluster	intron_variant	SOD1	T:0.000007:1:GnomAD_genomes|T:0.000011:3:TOPMED|T:0.:0:ALFA
21	31661700	C>T	snv	1024076847		by-frequency;by-alfa;by-cluster	intron_variant	SOD1	T:0.000047:7:GnomAD_genomes|T:0.000023:6:TOPMED|T:0.:0:ALFA
21	31663635	G>C	snv	1024231583			upstream_transcript_variant;2KB_upstream_variant;intron_variant	SOD1;LOC124900469
21	31663250	G>A	snv	1024346157		by-frequency;by-alfa;by-cluster	upstream_transcript_variant;2KB_upstream_variant;intron_variant	SOD1;LOC124900469	A:0.000004:1:TOPMED|A:0.:0:ALFA
21	31658069	C>A	snv	1024757174		by-frequency;by-alfa;by-cluster	2KB_upstream_variant;upstream_transcript_variant	SOD1	A:0.000023:6:TOPMED|A:0.:0:ALFA
21	31658284	T>A,C	snv	1024889860		by-frequency;by-alfa;by-cluster	2KB_upstream_variant;upstream_transcript_variant	SOD1	C:0.000026:7:TOPMED|C:0.:0:ALFA
21	31658307	T>C	snv	1024906296		by-frequency;by-alfa	2KB_upstream_variant;upstream_transcript_variant	SOD1	C:0.000004:1:TOPMED|C:0.:0:ALFA
21	31669331	T>C,G	snv	1024992137		by-frequency;by-alfa;by-cluster	downstream_transcript_variant;500B_downstream_variant	SOD1	G:0.00001:1:TOMMO|G:0.:0:ALFA
21	31662826	A>G	snv	1025081660		by-frequency;by-alfa;by-cluster	2KB_upstream_variant;upstream_transcript_variant;intron_variant	SOD1;LOC124900469	G:0.000007:1:GnomAD_genomes|G:0.000004:1:TOPMED|G:0.:0:ALFA
21	31662665	G>A	snv	1025133935		by-frequency;by-alfa	2KB_upstream_variant;upstream_transcript_variant;intron_variant	SOD1;LOC124900469	A:0.000004:1:TOPMED|A:0.:0:ALFA
21	31668832	A>G	snv	1025180818		by-frequency;by-alfa	3_prime_UTR_variant	SOD1	G:0.000004:1:TOPMED|G:0.:0:ALFA
21	31658110	C>A	snv	1025392026		by-frequency;by-alfa	2KB_upstream_variant;upstream_transcript_variant	SOD1	A:0.000008:2:TOPMED|A:0.:0:ALFA
21	31660391	A>G,T	snv	1025551870		by-frequency;by-alfa;by-cluster	intron_variant	SOD1	T:0.000047:7:GnomAD_genomes|T:0.000023:6:TOPMED|T:0.:0:ALFA
21	31663705	C>A,T	snv	1025819056		by-frequency;by-alfa;by-cluster	2KB_upstream_variant;upstream_transcript_variant;intron_variant	SOD1;LOC124900469	T:0.000004:1:TOPMED|T:0.:0:ALFA
21	31664829	A>C	snv	1025906169			downstream_transcript_variant;intron_variant;500B_downstream_variant	SOD1;LOC124900469
21	31659389	A>C,T	snv	1026011651		by-frequency;by-alfa;by-cluster	2KB_upstream_variant;upstream_transcript_variant	SOD1	T:0.000008:1:GnomAD_exomes|T:0.00008:12:GnomAD_genomes|T:0.000128:34:TOPMED|T:0.:0:ALFA
21	31659921	C>A,G,T	snv	1026156723		by-frequency;by-alfa;by-cluster	intron_variant	SOD1	T:0.000007:1:GnomAD_genomes|G:0.000013:1:TOMMO|T:0.000011:3:TOPMED|T:0.:0:ALFA
21	31667476	A>C	snv	1026698035		by-frequency;by-alfa	intron_variant	SOD1	C:0.:0:ALFA
21	31665162	A>-,AA	delins	1026771265		by-frequency;by-alfa;by-cluster	intron_variant	SOD1	-:0.000134:20:GnomAD_genomes|-:0.000065:5:TOMMO|AAAAAAAAA:0.:0:ALFA
21	31667051	G>A,C	snv	1026816169		by-frequency;by-alfa;by-cluster	intron_variant	SOD1	C:0.000002:1:GnomAD_exomes|C:0.000004:1:TOPMED|C:0.:0:ALFA
21	31666095	C>G,T	snv	1027589289		by-frequency;by-alfa;by-cluster	intron_variant	SOD1	G:0.000013:2:GnomAD_genomes|T:0.:0:ALFA
21	31661652	C>A,G,T	snv	1027646425		by-frequency;by-alfa;by-cluster	intron_variant	SOD1	G:0.000101:15:GnomAD_genomes|G:0.000039:3:TOMMO|T:0.:0:ALFA
21	31665843	A>G	snv	1027705097		by-frequency;by-alfa;by-cluster	intron_variant	SOD1	G:0.000223:1:Estonian|G:0.000007:1:GnomAD_genomes|G:0.000008:2:TOPMED|G:0.000054:1:ALFA
21	31659308	T>G	snv	1027829638		by-frequency;by-alfa;by-cluster	2KB_upstream_variant;upstream_transcript_variant	SOD1	G:0.000007:1:GnomAD_genomes|G:0.000004:1:TOPMED|G:0.:0:ALFA
21	31659048	C>T	snv	1027873648		by-frequency;by-alfa;by-cluster	2KB_upstream_variant;upstream_transcript_variant	SOD1	T:0.000013:1:TOMMO|T:0.000004:1:TOPMED|T:0.:0:ALFA
21	31662290	T>C	snv	1028148154		by-frequency;by-alfa;by-cluster	intron_variant	SOD1	C:0.000027:4:GnomAD_genomes|C:0.000023:6:TOPMED|C:0.:0:ALFA
21	31668699	A>G	snv	1028487005		by-frequency;by-alfa;by-cluster	3_prime_UTR_variant	SOD1	G:0.000074:46:GnomAD_exomes|G:0.000087:13:GnomAD_genomes|G:0.000098:26:TOPMED|G:0.:0:ALFA
21	31667615	C>A,G	snv	1028764768		by-frequency;by-alfa;by-cluster	intron_variant	SOD1	G:0.000013:2:GnomAD_genomes|G:0.:0:ALFA
21	31662674	C>A	snv	1028768143		by-frequency;by-alfa;by-cluster	2KB_upstream_variant;upstream_transcript_variant;intron_variant	SOD1;LOC124900469	A:0.000007:1:GnomAD_genomes|A:0.000015:4:TOPMED|A:0.:0:ALFA
21	31660105	A>G	snv	1028967969		by-frequency;by-cluster	intron_variant	SOD1	A:0.5:1:Siberian|G:0.00009:7:TOMMO
21	31663145	AAGT>-	del	1029205260		by-frequency;by-alfa;by-cluster	2KB_upstream_variant;upstream_transcript_variant;intron_variant	SOD1;LOC124900469	-:0.000444:64:GnomAD_genomes|-:0.000506:6:ALFA
21	31660181	G>C,T	snv	1029417410		by-frequency;by-alfa;by-cluster	intron_variant	SOD1	T:0.000467:1:GnomAD_exomes|T:0.00004:6:GnomAD_genomes|T:0.002405:7:KOREAN|T:0.002753:5:Korea1K|T:0.001803:13:Korea4K|T:0.000015:4:TOPMED|T:0.:0:ALFA
21	31660860	G>A,C	snv	1029834409		by-frequency;by-alfa;by-cluster	intron_variant	SOD1	C:0.:0:ALFA
21	31664086	C>T	snv	1030034037		by-frequency;by-alfa;by-cluster	2KB_upstream_variant;upstream_transcript_variant;intron_variant	SOD1;LOC124900469	T:0.000007:1:GnomAD_genomes|T:0.000008:2:TOPMED|T:0.:0:ALFA
21	31659264	A>G	snv	1030419330		by-frequency;by-alfa;by-cluster	2KB_upstream_variant;upstream_transcript_variant	SOD1	G:0.00002:3:GnomAD_genomes|G:0.000079:21:TOPMED|G:0.:0:ALFA
21	31666174	A>C,G	snv	1030504914		by-frequency;by-alfa;by-cluster	intron_variant	SOD1	G:0.:0:ALFA
21	31658889	C>A,T	snv	1030532427		by-frequency;by-alfa;by-cluster	2KB_upstream_variant;upstream_transcript_variant	SOD1	A:0.000004:1:TOPMED|T:0.:0:ALFA
21	31666661	C>A,T	snv	1030705689		by-cluster	intron_variant	SOD1
21	31664225	G>A,C,T	snv	1031003113		by-frequency;by-alfa;by-cluster	2KB_upstream_variant;upstream_transcript_variant;intron_variant	SOD1;LOC124900469	A:0.00032:25:TOMMO|A:0.:0:ALFA
21	31658667	G>A,C	snv	1031007800		by-frequency;by-alfa;by-cluster	2KB_upstream_variant;upstream_transcript_variant	SOD1	C:0.000004:1:TOPMED|C:0.:0:ALFA
21	31666915	T>A	snv	1031267162		by-frequency;by-alfa	intron_variant	SOD1	A:0.:0:ALFA
21	31668852	T>C	snv	1031272845		by-frequency;by-alfa;by-cluster	3_prime_UTR_variant	SOD1	C:0.000007:1:GnomAD_genomes|C:0.000004:1:TOPMED|C:0.:0:ALFA
21	31662870	C>A	snv	1031626592		by-frequency;by-alfa;by-cluster	2KB_upstream_variant;upstream_transcript_variant;intron_variant	SOD1;LOC124900469	A:0.000007:1:GnomAD_genomes|A:0.000011:3:TOPMED|A:0.:0:ALFA
21	31665203	C>T	snv	1032123392			intron_variant	SOD1
21	31668273	G>C,T	snv	1032385587		by-frequency;by-alfa;by-cluster	intron_variant	SOD1	C:0.000007:1:GnomAD_genomes|T:0.000039:3:TOMMO|C:0.000004:1:TOPMED|C:0.:0:ALFA
21	31661723	G>T	snv	1032877616		by-frequency;by-alfa	intron_variant	SOD1	T:0.000004:1:TOPMED|T:0.:0:ALFA
21	31667574	A>G	snv	1032894628		by-frequency;by-alfa	intron_variant	SOD1	G:0.000019:5:TOPMED|G:0.:0:ALFA
21	31667074	C>T	snv	1033000214		by-frequency;by-alfa;by-cluster	intron_variant	SOD1	T:0.000004:2:GnomAD_exomes|T:0.000008:2:TOPMED|T:0.:0:ALFA
21	31661997	T>G	snv	1033240081		by-frequency;by-alfa;by-cluster	intron_variant	SOD1	G:0.000013:2:GnomAD_genomes|G:0.000011:3:TOPMED|G:0.000071:1:ALFA
21	31662396	A>G	snv	1033288585		by-frequency;by-alfa;by-cluster	2KB_upstream_variant;upstream_transcript_variant;intron_variant	SOD1;LOC124900469	G:0.000013:2:GnomAD_genomes|G:0.000011:3:TOPMED|G:0.:0:ALFA
21	31659631	C>A	snv	1033334350		by-frequency;by-cluster	2KB_upstream_variant;upstream_transcript_variant	SOD1	A:0.00001:1:TOMMO
21	31664655	G>C	snv	1033501986		by-frequency;by-alfa	downstream_transcript_variant;intron_variant;500B_downstream_variant	SOD1;LOC124900469	C:0.:0:ALFA
21	31664851	C>T	snv	1033967164		by-frequency;by-alfa;by-cluster	downstream_transcript_variant;intron_variant;500B_downstream_variant	SOD1;LOC124900469	T:0.000156:1:1000Genomes_30X|T:0.000188:28:GnomAD_genomes|T:0.000234:62:TOPMED|T:0.000214:3:ALFA
21	31661406	C>G	snv	1034054698		by-frequency;by-alfa;by-cluster	intron_variant	SOD1	G:0.000007:1:GnomAD_genomes|G:0.000004:1:TOPMED|G:0.:0:ALFA
21	31666988	T>C	snv	1034155041		by-frequency;by-alfa;by-cluster	intron_variant	SOD1	C:0.000012:4:GnomAD_exomes|C:0.000007:1:GnomAD_genomes|C:0.000011:3:TOPMED|C:0.:0:ALFA
21	31658297	G>A,C,T	snv	1034276774		by-frequency;by-alfa;by-cluster	2KB_upstream_variant;upstream_transcript_variant	SOD1	C:0.:0:ALFA
21	31663646	G>A,C	snv	1034550545		by-frequency;by-alfa;by-cluster	2KB_upstream_variant;upstream_transcript_variant;intron_variant	SOD1;LOC124900469	C:0.000228:34:GnomAD_genomes|C:0.000298:79:TOPMED|C:0.000142:2:ALFA
21	31663293	T>C	snv	1034907409		by-frequency;by-alfa;by-cluster	2KB_upstream_variant;upstream_transcript_variant;intron_variant	SOD1;LOC124900469	C:0.000007:1:GnomAD_genomes|C:0.000008:2:TOPMED|C:0.:0:ALFA
21	31660454	A>G,T	snv	1034960748		by-frequency;by-alfa;by-cluster	intron_variant	SOD1	G:0.00001:1:TOMMO|T:0.:0:ALFA
21	31660659	A>G	snv	1035013165		by-frequency;by-alfa;by-cluster	intron_variant	SOD1	G:0.000156:1:1000Genomes_30X|G:0.00002:3:GnomAD_genomes|G:0.:0:ALFA
21	31666112	T>C	snv	1035227467		by-frequency;by-alfa;by-cluster	intron_variant	SOD1	C:0.000034:5:GnomAD_genomes|C:0.000142:2:ALFA
21	31665726	G>A	snv	1035850436		by-frequency;by-alfa;by-cluster	intron_variant	SOD1	A:0.000013:2:GnomAD_genomes|A:0.000038:10:TOPMED|A:0.:0:ALFA
21	31665530	C>T	snv	1035901227		by-frequency;by-alfa	intron_variant	SOD1	T:0.000004:1:TOPMED|T:0.:0:ALFA
21	31666978	C>T	snv	1036068916		by-frequency;by-alfa;by-cluster	intron_variant	SOD1	T:0.000009:3:GnomAD_exomes|T:0.00002:3:GnomAD_genomes|T:0.000015:4:TOPMED|T:0.:0:ALFA
21	31658442	G>A	snv	1036095417		by-frequency;by-alfa;by-cluster	2KB_upstream_variant;upstream_transcript_variant	SOD1	A:0.00002:3:GnomAD_genomes|A:0.000015:4:TOPMED|A:0.:0:ALFA
21	31663948	T>C	snv	1036120432		by-frequency;by-alfa;by-cluster	2KB_upstream_variant;upstream_transcript_variant;intron_variant	SOD1;LOC124900469	C:0.000004:1:TOPMED|C:0.:0:ALFA
21	31663567	G>C	snv	1036235368		by-frequency;by-alfa;by-cluster	2KB_upstream_variant;upstream_transcript_variant;intron_variant	SOD1;LOC124900469	C:0.000174:26:GnomAD_genomes|C:0.000234:62:TOPMED|C:0.000214:3:ALFA
21	31658762	C>A	snv	1036555082		by-frequency;by-alfa;by-cluster	2KB_upstream_variant;upstream_transcript_variant	SOD1	A:0.000007:1:GnomAD_genomes|A:0.000045:12:TOPMED|A:0.:0:ALFA
21	31658024	G>A	snv	1036769919		by-frequency;by-alfa;by-cluster	2KB_upstream_variant;upstream_transcript_variant	SOD1	A:0.000015:2:GnomAD_genomes|A:0.000011:3:TOPMED|A:0.:0:ALFA
21	31668197	C>T	snv	1036784368		by-frequency;by-alfa;by-cluster	intron_variant	SOD1	T:0.000008:2:TOPMED|T:0.:0:ALFA
21	31663014	AAAAA>-,A,AAAA,AAAAAA,AAAAAAA	delins	1036862755		by-frequency;by-alfa;by-cluster	2KB_upstream_variant;upstream_transcript_variant;intron_variant	SOD1;LOC124900469	-:0.00042:52:GnomAD_genomes|A:0.023472:43:Korea1K|A:0.001667:1:NorthernSweden|AAAAAAAAAA:0.:0:ALFA
21	31668752	A>G	snv	1037020578		by-frequency;by-alfa;by-cluster	3_prime_UTR_variant	SOD1	G:0.000005:2:GnomAD_exomes|G:0.000007:1:GnomAD_genomes|G:0.000011:3:TOPMED|G:0.:0:ALFA
21	31668371	T>C	snv	1037071996		by-frequency;by-alfa	intron_variant	SOD1	C:0.000023:6:TOPMED|C:0.:0:ALFA
21	31668434	T>C,G	snv	1037082852		by-frequency;by-alfa;by-cluster	intron_variant	SOD1	G:0.:0:ALFA
21	31662524	A>G	snv	1037129535		by-frequency;by-alfa;by-cluster	2KB_upstream_variant;upstream_transcript_variant;intron_variant	SOD1;LOC124900469	G:0.000004:1:TOPMED|G:0.:0:ALFA
21	31662198	G>A	snv	1037245274		by-frequency;by-alfa;by-cluster	intron_variant	SOD1	A:0.00002:3:GnomAD_genomes|A:0.00003:8:TOPMED|A:0.:0:ALFA
21	31662783	G>A	snv	1037319801		by-frequency;by-alfa	2KB_upstream_variant;upstream_transcript_variant;intron_variant	SOD1;LOC124900469	A:0.000004:1:TOPMED|A:0.:0:ALFA
21	31660597	G>C	snv	1037533131		by-frequency;by-alfa;by-cluster	intron_variant	SOD1	C:0.00002:3:GnomAD_genomes|C:0.000011:3:TOPMED|C:0.:0:ALFA
21	31666030	G>A	snv	1037688255		by-frequency;by-alfa	intron_variant	SOD1	A:0.000004:1:TOPMED|A:0.:0:ALFA
21	31665690	T>C	snv	1037742130		by-frequency;by-alfa	intron_variant	SOD1	C:0.000004:1:TOPMED|C:0.:0:ALFA
21	31659499	C>A,T	snv	1037888902		by-frequency;by-alfa;by-cluster	2KB_upstream_variant;upstream_transcript_variant	SOD1	A:0.000005:2:GnomAD_exomes|A:0.000054:8:GnomAD_genomes|T:0.:0:ALFA
21	31664775	C>A,T	snv	1037912493		by-frequency;by-alfa;by-cluster	downstream_transcript_variant;intron_variant;500B_downstream_variant	SOD1;LOC124900469	T:0.:0:ALFA
21	31660395	T>C	snv	1037983123		by-frequency;by-alfa	intron_variant	SOD1	C:0.000008:2:TOPMED|C:0.:0:ALFA
21	31659580	A>C	snv	1038176496		by-frequency;by-alfa;by-cluster	2KB_upstream_variant;upstream_transcript_variant	SOD1	C:0.000156:1:1000Genomes_30X|C:0.000022:10:GnomAD_exomes|C:0.000188:28:GnomAD_genomes|C:0.000121:32:TOPMED|C:0.000071:1:ALFA
21	31661605	A>C,G	snv	1038585493		by-frequency;by-alfa;by-cluster	intron_variant	SOD1	C:0.000007:1:GnomAD_genomes|C:0.004367:8:Korea1K|G:0.000004:1:TOPMED|G:0.:0:ALFA
21	31659890	G>T	snv	1038795618		by-frequency;by-alfa;by-cluster	intron_variant	SOD1	T:0.0000007:1:GnomAD_exomes|T:0.0000067:1:GnomAD_genomes|T:0.0000038:1:TOPMED|T:0.:0:ALFA
21	31665620	T>A	snv	1038823473		by-frequency;by-alfa;by-cluster	intron_variant	SOD1	A:0.000013:2:GnomAD_genomes|A:0.000015:4:TOPMED|A:0.:0:ALFA
21	31665352	CTT>-	delins	1038877467		by-frequency;by-alfa;by-cluster	intron_variant	SOD1	-:0.000107:16:GnomAD_genomes|-:0.000174:46:TOPMED|TTCTT:0.000071:1:ALFA
21	31661810	G>A	snv	1038942715		by-frequency;by-alfa;by-cluster	intron_variant	SOD1	A:0.000013:2:GnomAD_genomes|A:0.000011:3:TOPMED|A:0.:0:ALFA
21	31660121	G>T	snv	1039156345		by-frequency;by-alfa;by-cluster	intron_variant	SOD1	T:0.000007:1:GnomAD_genomes|T:0.000011:3:TOPMED|T:0.:0:ALFA
21	31666383	C>G	snv	1039485875		by-frequency;by-alfa;by-cluster	intron_variant	SOD1	G:0.0000037:4:GnomAD_exomes|G:0.0000671:10:GnomAD_genomes|G:0.0000718:19:TOPMED|G:0.0000712:1:ALFA
21	31660384	G>A	snv	1039585833		by-frequency;by-alfa;by-cluster	intron_variant	SOD1	A:0.000101:15:GnomAD_genomes|A:0.000102:27:TOPMED|A:0.000071:1:ALFA
21	31666083	T>C,G	snv	1040031701		by-frequency;by-alfa;by-cluster	intron_variant	SOD1	G:0.000138:1:Korea4K|G:0.003551:275:TOMMO|G:0.000004:1:TOPMED|G:0.:0:ALFA
21	31660810	A>G	snv	1040204234		by-frequency;by-alfa;by-cluster	intron_variant	SOD1	G:0.000013:2:GnomAD_genomes|G:0.000026:7:TOPMED|G:0.:0:ALFA
21	31662832	G>A	snv	1040253200		by-frequency;by-alfa;by-cluster	2KB_upstream_variant;upstream_transcript_variant;intron_variant	SOD1;LOC124900469	A:0.000027:4:GnomAD_genomes|A:0.000011:3:TOPMED|A:0.000071:1:ALFA
21	31657961	G>A,T	snv	1040464502		by-frequency;by-alfa;by-cluster	2KB_upstream_variant;upstream_transcript_variant	SOD1	A:0.000007:1:GnomAD_genomes|T:0.:0:ALFA
21	31664574	A>G	snv	1040940229		by-frequency;by-alfa;by-cluster	downstream_transcript_variant;intron_variant;500B_downstream_variant	SOD1;LOC124900469	G:0.000094:14:GnomAD_genomes|G:0.00023:61:TOPMED|G:0.000214:3:ALFA
21	31661797	T>G	snv	1041142391			intron_variant	SOD1
21	31661631	G>A	snv	1041263310			intron_variant	SOD1
21	31667843	G>A	snv	1041304889		by-frequency;by-alfa;by-cluster	intron_variant	SOD1	A:0.000007:1:GnomAD_genomes|A:0.000008:2:TOPMED|A:0.:0:ALFA
21	31668146	G>T	snv	1041578790			intron_variant	SOD1
21	31659214	A>G	snv	1041732726		by-frequency;by-alfa;by-cluster	2KB_upstream_variant;upstream_transcript_variant	SOD1	G:0.000007:1:GnomAD_genomes|G:0.000004:1:TOPMED|G:0.:0:ALFA
21	31660786	C>T	snv	1041740627		by-frequency;by-alfa	intron_variant	SOD1	T:0.000004:1:TOPMED|T:0.:0:ALFA
21	31666660	T>A,G	snv	1041821670		by-frequency;by-alfa	intron_variant	SOD1	G:0.000002:1:GnomAD_exomes|A:0.:0:ALFA
21	31664528	C>T	snv	1041822133		by-frequency;by-alfa;by-cluster	downstream_transcript_variant;intron_variant;500B_downstream_variant	SOD1;LOC124900469	T:0.000013:2:GnomAD_genomes|T:0.000004:1:TOPMED|T:0.:0:ALFA
21	31664188	G>A	snv	1041938677		by-frequency;by-alfa;by-cluster	2KB_upstream_variant;upstream_transcript_variant;intron_variant	SOD1;LOC124900469	A:0.000007:1:GnomAD_genomes|A:0.000004:1:TOPMED|A:0.:0:ALFA
21	31659446	G>A,C	snv	1042678916		by-cluster	2KB_upstream_variant;upstream_transcript_variant	SOD1
21	31660097	G>A,C,T	snv	1043343548		by-frequency;by-alfa;by-cluster	intron_variant	SOD1	G:0.5:1:SGDP_PRJ|C:0.:0:ALFA
21	31661539	A>G	snv	1043361208			intron_variant	SOD1
21	31665646	C>G	snv	1043493152			intron_variant	SOD1
21	31659866	->TG	delins	1043783037		by-frequency;by-alfa;by-cluster	intron_variant	SOD1	TG:0.0000043:6:GnomAD_exomes|TG:0.0000038:1:TOPMED|TGTG:0.:0:ALFA
21	31660110	C>G,T	snv	1043797689		by-frequency;by-alfa;by-cluster	intron_variant	SOD1	G:0.000007:1:GnomAD_genomes|T:0.000004:1:TOPMED|T:0.:0:ALFA
21	31660324	C>A,T	snv	1043967147		by-frequency;by-alfa;by-cluster	intron_variant	SOD1	A:0.00002:3:GnomAD_genomes|A:0.000019:5:TOPMED|A:0.:0:ALFA
21	31668830	G>T	snv	1044174451		by-frequency;by-alfa;by-cluster	3_prime_UTR_variant	SOD1	T:0.000053:14:TOPMED|T:0.:0:ALFA
21	31659592	G>A,C	snv	1044613942		by-frequency;by-alfa;by-cluster	2KB_upstream_variant;upstream_transcript_variant	SOD1	C:0.000015:7:GnomAD_exomes|C:0.:0:ALFA
21	31664762	G>A	snv	1044733081		by-frequency;by-alfa;by-cluster	downstream_transcript_variant;intron_variant;500B_downstream_variant	SOD1;LOC124900469	A:0.000047:7:GnomAD_genomes|A:0.000038:10:TOPMED|A:0.:0:ALFA
21	31659688	G>A	snv	1044948611		by-frequency;by-alfa;by-cluster	2KB_upstream_variant;upstream_transcript_variant	SOD1	A:0.0000089:11:GnomAD_exomes|A:0.0000067:1:GnomAD_genomes|A:0.0000129:1:TOMMO|A:0.0000076:2:TOPMED|A:0.:0:ALFA
21	31661964	A>G	snv	1045473390		by-frequency;by-alfa	intron_variant	SOD1	G:0.000008:2:TOPMED|G:0.:0:ALFA
21	31667474	A>G	snv	1045558292		by-frequency;by-alfa;by-cluster	intron_variant	SOD1	G:0.000013:9:GnomAD_exomes|G:0.000047:7:GnomAD_genomes|G:0.000023:6:TOPMED|G:0.:0:ALFA
21	31663998	G>A,T	snv	1045754065		by-frequency;by-alfa;by-cluster	2KB_upstream_variant;upstream_transcript_variant;intron_variant	SOD1;LOC124900469	T:0.00001:6:GnomAD_exomes|T:0.000013:2:GnomAD_genomes|T:0.000011:3:TOPMED|T:0.:0:ALFA
21	31663060	C>G,T	snv	1046467113		by-frequency;by-alfa;by-cluster	2KB_upstream_variant;upstream_transcript_variant;intron_variant	SOD1;LOC124900469	G:0.000014:2:GnomAD_genomes|T:0.:0:ALFA
21	31669259	A>G	snv	1046476753		by-frequency;by-alfa;by-cluster	downstream_transcript_variant;500B_downstream_variant	SOD1	G:0.000007:1:GnomAD_genomes|G:0.000008:2:TOPMED|G:0.:0:ALFA
21	31658488	G>A	snv	1046622171		by-frequency;by-alfa;by-cluster	2KB_upstream_variant;upstream_transcript_variant	SOD1	A:0.00002:3:GnomAD_genomes|A:0.000023:6:TOPMED|A:0.000071:1:ALFA
21	31664146	A>G	snv	1046734152		by-frequency;by-alfa;by-cluster	2KB_upstream_variant;upstream_transcript_variant;intron_variant	SOD1;LOC124900469	G:0.000034:5:GnomAD_genomes|G:0.000049:13:TOPMED|G:0.000071:1:ALFA
21	31660821	C>G,T	snv	1046906338		by-frequency;by-alfa;by-cluster	intron_variant	SOD1	T:0.000007:1:GnomAD_genomes|T:0.000004:1:TOPMED|T:0.:0:ALFA
21	31669044	A>G	snv	1046988178		by-frequency;by-alfa	downstream_transcript_variant;500B_downstream_variant	SOD1	G:0.000008:2:TOPMED|G:0.:0:ALFA
21	31664297	A>G	snv	1047157398		by-frequency;by-alfa;by-cluster	2KB_upstream_variant;upstream_transcript_variant;intron_variant	SOD1;LOC124900469	G:0.000007:1:GnomAD_genomes|G:0.000004:1:TOPMED|G:0.:0:ALFA
21	31660604	G>T	snv	1047295759			intron_variant	SOD1
21	31665109	G>A	snv	1047416623			intron_variant	SOD1
21	31660352	T>G	snv	1047495380		by-frequency;by-alfa;by-cluster	intron_variant	SOD1	G:0.000007:1:GnomAD_genomes|G:0.000004:1:TOPMED|G:0.:0:ALFA
21	31660165	C>A	snv	1047550017		by-frequency;by-alfa;by-cluster	intron_variant	SOD1	A:0.0003:1:GnomAD_exomes|A:0.000013:2:GnomAD_genomes|A:0.000019:5:TOPMED|A:0.:0:ALFA
21	31665374	C>A	snv	1047708992		by-frequency;by-alfa;by-cluster	intron_variant	SOD1	A:0.000013:2:GnomAD_genomes|A:0.000008:2:TOPMED|A:0.:0:ALFA
21	31665370	T>C	snv	1047966195		by-frequency;by-alfa;by-cluster	intron_variant	SOD1	C:0.000007:1:GnomAD_genomes|C:0.:0:ALFA
21	31667868	C>G	snv	1048024847		by-frequency;by-alfa;by-cluster	intron_variant	SOD1	G:0.000013:2:GnomAD_genomes|G:0.000015:4:TOPMED|G:0.000071:1:ALFA
21	31668155	G>C	snv	1048078367			intron_variant	SOD1
21	31658578	C>G,T	snv	1048154481		by-frequency;by-alfa;by-cluster	2KB_upstream_variant;upstream_transcript_variant	SOD1	T:0.00004:6:GnomAD_genomes|T:0.000013:1:TOMMO|T:0.000045:12:TOPMED|T:0.:0:ALFA
21	31663375	A>G	snv	1048269463		by-frequency;by-alfa	2KB_upstream_variant;upstream_transcript_variant;intron_variant	SOD1;LOC124900469	G:0.000008:2:TOPMED|G:0.:0:ALFA
21	31659706	C>A,G,T	snv	1048373736		by-frequency;by-alfa;by-cluster	5_prime_UTR_variant	SOD1	T:0.000026:2:TOMMO|T:0.000053:14:TOPMED|T:0.:0:ALFA
21	31668785	CT>-	delins	1048516334		by-frequency;by-alfa;by-cluster	3_prime_UTR_variant	SOD1	-:0.000032:12:GnomAD_exomes|-:0.000033:5:GnomAD_genomes|-:0.000038:10:TOPMED|T:0.:0:ALFA
21	31668383	T>C,G	snv	1048624863		by-frequency;by-alfa;by-cluster	intron_variant	SOD1	G:0.000223:1:Estonian|G:0.000013:2:GnomAD_genomes|G:0.000023:6:TOPMED|G:0.000054:1:ALFA
21	31663027	A>C	snv	1048802685		by-frequency;by-alfa;by-cluster	2KB_upstream_variant;upstream_transcript_variant;intron_variant	SOD1;LOC124900469	C:0.000007:1:GnomAD_genomes|C:0.000004:1:TOPMED|C:0.:0:ALFA
21	31662176	T>G	snv	1049055529		by-frequency;by-alfa;by-cluster	intron_variant	SOD1	G:0.000007:1:GnomAD_genomes|G:0.:0:ALFA
21	31666420	T>G	snv	1049080066		by-frequency;by-alfa;by-cluster	intron_variant	SOD1	G:0.000004:1:TOPMED|G:0.:0:ALFA
21	31659564	G>A,C	snv	1049165773		by-frequency;by-alfa;by-cluster	2KB_upstream_variant;upstream_transcript_variant	SOD1	A:0.000013:2:GnomAD_genomes|C:0.000013:1:TOMMO|A:0.000015:4:TOPMED|A:0.:0:ALFA
21	31662742	T>G	snv	1049483037		by-frequency;by-alfa;by-cluster	2KB_upstream_variant;upstream_transcript_variant;intron_variant	SOD1;LOC124900469	G:0.000007:1:GnomAD_genomes|G:0.000004:1:TOPMED|G:0.:0:ALFA
21	31669263	T>G	snv	1049699799		by-frequency;by-alfa;by-cluster	downstream_transcript_variant;500B_downstream_variant	SOD1	G:0.000027:4:GnomAD_genomes|G:0.000026:7:TOPMED|G:0.000071:1:ALFA
21	31658220	C>T	snv	1050054414		by-frequency;by-alfa;by-cluster	2KB_upstream_variant;upstream_transcript_variant	SOD1	T:0.00006:9:GnomAD_genomes|T:0.000079:21:TOPMED|T:0.000142:2:ALFA
21	31668328	C>T	snv	1050110154		by-frequency;by-alfa;by-cluster	intron_variant	SOD1	T:0.000002:1:GnomAD_exomes|T:0.000004:1:TOPMED|T:0.:0:ALFA
21	31663460	A>G,T	snv	1050297915		by-frequency;by-alfa;by-cluster	2KB_upstream_variant;upstream_transcript_variant;intron_variant	SOD1;LOC124900469	G:0.000027:4:GnomAD_genomes|T:0.:0:ALFA
21	31663111	C>A,T	snv	1050657614		by-frequency;by-alfa;by-cluster	2KB_upstream_variant;upstream_transcript_variant;intron_variant	SOD1;LOC124900469	C:0.5:1:SGDP_PRJ|T:0.:0:ALFA
21	31660349	A>C	snv	1050718821		by-frequency;by-alfa;by-cluster	intron_variant	SOD1	C:0.000013:2:GnomAD_genomes|C:0.000008:2:TOPMED|C:0.:0:ALFA
21	31660558	C>T	snv	1050758837		by-frequency;by-alfa;by-cluster	intron_variant	SOD1	T:0.000007:1:GnomAD_genomes|T:0.000015:4:TOPMED|T:0.:0:ALFA
21	31666054	C>A,G	snv	1050966407		by-frequency;by-alfa;by-cluster	intron_variant	SOD1	G:0.000027:4:GnomAD_genomes|G:0.:0:ALFA
21	31665738	G>C	snv	1051342169		by-frequency;by-alfa;by-cluster	intron_variant	SOD1	C:0.000008:2:TOPMED|C:0.:0:ALFA
21	31666948	TTTAA>-	delins	1051369463		by-frequency;by-alfa;by-cluster	intron_variant	SOD1	-:0.000072:18:GnomAD_exomes|-:0.000107:16:GnomAD_genomes|-:0.000013:1:TOMMO|-:0.000106:28:TOPMED|AA:0.:0:ALFA
21	31659482	G>A,C	snv	1051732092		by-frequency;by-alfa;by-cluster	2KB_upstream_variant;upstream_transcript_variant	SOD1	A:0.000312:2:1000Genomes_30X|A:0.000027:4:GnomAD_genomes|A:0.000023:6:TOPMED|A:0.000142:2:ALFA
21	31661609	G>A,T	snv	1052395088		by-frequency;by-alfa;by-cluster	intron_variant	SOD1	A:0.000013:2:GnomAD_genomes|T:0.:0:ALFA
21	31669270	C>A	snv	1052591919		by-frequency;by-alfa;by-cluster	downstream_transcript_variant;500B_downstream_variant	SOD1	A:0.000007:1:GnomAD_genomes|A:0.000008:2:TOPMED|A:0.:0:ALFA
21	31669074	A>C,G	snv	1052642182		by-frequency;by-alfa;by-cluster	downstream_transcript_variant;500B_downstream_variant	SOD1	G:0.:0:ALFA
21	31659710	A>C,G	snv	1053394936		by-frequency;by-alfa;by-cluster	5_prime_UTR_variant	SOD1	G:0.000223:1:Estonian|G:0.000013:2:GnomAD_genomes|G:0.000015:4:TOPMED|G:0.000054:1:ALFA
21	31658848	C>A,T	snv	1053625888		by-frequency;by-alfa;by-cluster	2KB_upstream_variant;upstream_transcript_variant	SOD1	T:0.:0:ALFA
21	31657962	C>-	del	1054019598		by-frequency;by-alfa;by-cluster	2KB_upstream_variant;upstream_transcript_variant	SOD1	-:0.000027:4:GnomAD_genomes|-:0.000057:15:TOPMED|-:0.:0:ALFA
21	31663042	G>A,C	snv	1054140577		by-frequency;by-alfa;by-cluster	2KB_upstream_variant;upstream_transcript_variant;intron_variant	SOD1;LOC124900469	C:0.000014:2:GnomAD_genomes|C:0.000004:1:TOPMED|C:0.:0:ALFA
21	31662574	T>A	snv	1054208267		by-cluster	2KB_upstream_variant;upstream_transcript_variant;intron_variant	SOD1;LOC124900469
21	31662244	T>G	snv	1054224535		by-frequency;by-alfa;by-cluster	intron_variant	SOD1	G:0.000027:4:GnomAD_genomes|G:0.000026:7:TOPMED|G:0.:0:ALFA
21	31668901	G>A	snv	1054265376		by-frequency;by-alfa;by-cluster	3_prime_UTR_variant	SOD1	A:0.000036:5:GnomAD_exomes|A:0.000013:2:GnomAD_genomes|A:0.004107:12:KOREAN|A:0.001638:3:Korea1K|A:0.002212:16:Korea4K|A:0.000698:54:TOMMO|A:0.:0:ALFA
21	31662804	G>A	snv	1054494142		by-frequency;by-alfa;by-cluster	2KB_upstream_variant;upstream_transcript_variant;intron_variant	SOD1;LOC124900469	A:0.000004:1:TOPMED|A:0.:0:ALFA
21	31657856	G>A	snv	1054670835		by-frequency;by-cluster	2KB_upstream_variant;upstream_transcript_variant	SOD1	A:0.:0:GnomAD_genomes
21	31665411	G>A	snv	1055170652		by-frequency;by-alfa;by-cluster	intron_variant	SOD1	A:0.000027:4:GnomAD_genomes|A:0.000015:4:TOPMED|A:0.:0:ALFA
21	31659922	G>A,T	snv	1055186134		by-frequency;by-alfa;by-cluster	intron_variant	SOD1	A:0.0000041:5:GnomAD_exomes|A:0.0000067:1:GnomAD_genomes|T:0.0000129:1:TOMMO|A:0.0000038:1:TOPMED|A:0.:0:ALFA
21	31662147	C>G	snv	1055342406		by-frequency;by-alfa;by-cluster	intron_variant	SOD1	G:0.00006:9:GnomAD_genomes|G:0.000049:13:TOPMED|G:0.000071:1:ALFA
21	31661870	T>C	snv	1055399884		by-frequency;by-alfa;by-cluster	intron_variant	SOD1	C:0.000027:4:GnomAD_genomes|C:0.00003:8:TOPMED|C:0.000142:2:ALFA
21	31664170	A>G,T	snv	1055771795		by-frequency;by-alfa;by-cluster	2KB_upstream_variant;upstream_transcript_variant;intron_variant	SOD1;LOC124900469	G:0.000223:1:Estonian|G:0.000005:1:GnomAD_exomes|G:0.000054:1:ALFA
21	31664031	G>T	snv	1056277094		by-frequency;by-alfa;by-cluster	2KB_upstream_variant;upstream_transcript_variant;intron_variant	SOD1;LOC124900469	T:0.000006:3:GnomAD_exomes|T:0.000087:13:GnomAD_genomes|T:0.000079:21:TOPMED|T:0.000071:1:ALFA
21	31666866	A>T	snv	1056439447		by-frequency;by-alfa;by-cluster	intron_variant	SOD1	T:0.000055:4:GnomAD_exomes|T:0.000055:8:GnomAD_genomes|T:0.000556:1:Korea1K|T:0.000138:1:Korea4K|T:0.000098:26:TOPMED|T:0.000142:2:ALFA
21	31661310	C>G,T	snv	1056860669		by-frequency;by-alfa;by-cluster	intron_variant	SOD1	T:0.000027:4:GnomAD_genomes|T:0.:0:ALFA
21	31660759	C>T	snv	1057034057		by-frequency;by-alfa;by-cluster	intron_variant	SOD1	T:0.000027:4:GnomAD_genomes|T:0.000023:6:TOPMED|T:0.:0:ALFA
21	31660649	C>T	snv	1057084334		by-frequency;by-alfa;by-cluster	intron_variant	SOD1	T:0.000027:4:GnomAD_genomes|T:0.000015:4:TOPMED|T:0.:0:ALFA
21	31665971	T>G	snv	1057095603		by-frequency;by-alfa;by-cluster	intron_variant	SOD1	G:0.00081:55:GnomAD_genomes|T:0.5:7:SGDP_PRJ|T:0.5:1:Siberian|G:0.00061:47:TOMMO|G:0.00042:5:ALFA
21	31665428	T>A	snv	1157695448		by-frequency;by-alfa	intron_variant	SOD1	A:0.000004:1:TOPMED|A:0.:0:ALFA
21	31658651	G>A	snv	1158167845		by-frequency;by-alfa;by-cluster	2KB_upstream_variant;upstream_transcript_variant	SOD1	A:0.000007:1:GnomAD_genomes|A:0.:0:ALFA
21	31662486	T>C	snv	1158412482		by-frequency;by-alfa	2KB_upstream_variant;upstream_transcript_variant;intron_variant	SOD1;LOC124900469	C:0.000004:1:TOPMED|C:0.000071:1:ALFA
21	31660270	C>T	snv	1158469358		by-frequency;by-alfa;by-cluster	intron_variant	SOD1	T:0.000007:1:GnomAD_genomes|T:0.:0:ALFA
21	31666365	G>A	snv	1158632276		by-frequency;by-alfa	intron_variant	SOD1	A:0.000002:2:GnomAD_exomes|A:0.:0:ALFA
21	31665497	T>C	snv	1158771166		by-frequency;by-alfa;by-cluster	intron_variant	SOD1	C:0.000007:1:GnomAD_genomes|C:0.000004:1:TOPMED|C:0.:0:ALFA
21	31661473	->CGGGTAGC	delins	1159018016		by-frequency;by-alfa;by-cluster	intron_variant	SOD1	CCGGGTAG:0.000312:2:1000Genomes_30X|CCGGGTAG:0.00008:12:GnomAD_genomes|CCGGGTAGC:0.:0:ALFA
21	31659630	C>T	snv	1159078933		by-frequency;by-alfa;by-cluster	2KB_upstream_variant;upstream_transcript_variant	SOD1	T:0.000003:2:GnomAD_exomes|T:0.000027:4:GnomAD_genomes|T:0.000015:4:TOPMED|T:0.:0:ALFA
21	31660264	G>A	snv	1159411915		by-frequency;by-alfa;by-cluster	intron_variant	SOD1	A:0.000007:1:GnomAD_genomes|A:0.000004:1:TOPMED|A:0.:0:ALFA
21	31664651	C>A,T	snv	1159566048		by-frequency;by-alfa;by-cluster	downstream_transcript_variant;intron_variant;500B_downstream_variant	SOD1;LOC124900469	A:0.000156:1:1000Genomes_30X|T:0.000004:1:TOPMED|T:0.000071:1:ALFA
21	31662504	G>A	snv	1159830608		by-frequency;by-alfa;by-cluster	2KB_upstream_variant;upstream_transcript_variant;intron_variant	SOD1;LOC124900469	A:0.000007:1:GnomAD_genomes|A:0.:0:ALFA
21	31665472	C>T	snv	1159892160		by-frequency;by-alfa;by-cluster	intron_variant	SOD1	T:0.000223:1:Estonian|T:0.000027:4:GnomAD_genomes|T:0.000019:5:TOPMED|T:0.000054:1:ALFA
21	31667766	C>T	snv	1160265282		by-frequency;by-alfa;by-cluster	intron_variant	SOD1	T:0.000007:1:GnomAD_genomes|T:0.:0:ALFA
21	31659942	->C	delins	1160735858		by-frequency;by-alfa	intron_variant	SOD1	C:0.000004:1:TOPMED|CCCC:0.000071:1:ALFA
21	31666523	C>T	snv	1160853166		by-frequency;by-alfa;by-cluster	intron_variant	SOD1	T:0.0000108:15:GnomAD_exomes|T:0.0000067:1:GnomAD_genomes|T:0.0000113:3:TOPMED|T:0.:0:ALFA
21	31668795	T>C	snv	1161045457		by-frequency;by-alfa;by-cluster	3_prime_UTR_variant	SOD1	C:0.000008:3:GnomAD_exomes|C:0.000013:2:GnomAD_genomes|C:0.000004:1:TOPMED|C:0.:0:ALFA
21	31668136	C>G	snv	1161125391		by-frequency;by-alfa	intron_variant	SOD1	G:0.000008:2:TOPMED|G:0.:0:ALFA
21	31663133	T>G	snv	1161173378		by-frequency;by-alfa;by-cluster	2KB_upstream_variant;upstream_transcript_variant;intron_variant	SOD1;LOC124900469	G:0.000007:1:GnomAD_genomes|G:0.000008:2:TOPMED|G:0.:0:ALFA
21	31669203	T>-	delins	1161723001		by-frequency;by-alfa	downstream_transcript_variant;500B_downstream_variant	SOD1	-:0.000015:4:TOPMED|TT:0.:0:ALFA
21	31660491	T>G	snv	1162057919		by-frequency;by-alfa;by-cluster	intron_variant	SOD1	G:0.000067:10:GnomAD_genomes|G:0.:0:ALFA
21	31666130	C>G	snv	1162296485		by-frequency;by-alfa	intron_variant	SOD1	G:0.:0:ALFA
21	31669043	T>C,G	snv	1162555850		by-frequency;by-alfa;by-cluster	downstream_transcript_variant;500B_downstream_variant	SOD1	C:0.000312:2:1000Genomes_30X|C:0.000013:2:GnomAD_genomes|C:0.000013:1:TOMMO|G:0.:0:ALFA
21	31663489	C>T	snv	1162824779		by-frequency;by-alfa	2KB_upstream_variant;upstream_transcript_variant;intron_variant	SOD1;LOC124900469	T:0.:0:ALFA
21	31664531	A>-	delins	1163367930		by-frequency;by-alfa;by-cluster	downstream_transcript_variant;intron_variant;500B_downstream_variant	SOD1;LOC124900469	-:0.000007:1:GnomAD_genomes|-:0.000004:1:TOPMED|AAA:0.:0:ALFA
21	31666782	C>G	snv	1163571951		by-frequency;by-cluster	intron_variant	SOD1	G:0.000006:2:GnomAD_exomes|G:0.000007:1:GnomAD_genomes
21	31665811	A>G	snv	1163864115		by-frequency;by-alfa;by-cluster	intron_variant	SOD1	G:0.000156:1:1000Genomes_30X|G:0.000007:1:GnomAD_genomes|G:0.000013:1:TOMMO|G:0.000008:2:TOPMED|G:0.:0:ALFA
21	31659766	A>G	snv	1164214591		by-frequency;by-alfa;by-cluster	5_prime_UTR_variant	SOD1	G:0.000001:1:GnomAD_exomes|G:0.000004:1:TOPMED|G:0.000033:1:ALFA
21	31663426	T>A	snv	1164259839		by-frequency;by-alfa;by-cluster	2KB_upstream_variant;upstream_transcript_variant;intron_variant	SOD1;LOC124900469	A:0.000007:1:GnomAD_genomes|A:0.000004:1:TOPMED|A:0.:0:ALFA
21	31662279	C>T	snv	1164467604		by-frequency;by-alfa	intron_variant	SOD1	T:0.000004:1:TOPMED|T:0.:0:ALFA
21	31665658	A>G	snv	1164557591		by-frequency;by-alfa;by-cluster	intron_variant	SOD1	G:0.000007:1:GnomAD_genomes|G:0.:0:ALFA
21	31667806	T>C	snv	1164602074		by-frequency;by-alfa;by-cluster	intron_variant	SOD1	C:0.00002:3:GnomAD_genomes|C:0.000008:2:TOPMED|C:0.:0:ALFA
21	31659866	T>C	snv	1164835709		by-frequency;by-alfa;by-cluster	intron_variant	SOD1	C:0.000013:2:GnomAD_genomes|C:0.000008:2:TOPMED|C:0.:0:ALFA
21	31659762	A>C,G	snv	1164844540		by-frequency;by-alfa;by-cluster	5_prime_UTR_variant	SOD1	C:0.00003:1:ALFA
21	31662393	T>A	snv	1165026074		by-frequency;by-alfa	2KB_upstream_variant;upstream_transcript_variant;intron_variant	SOD1;LOC124900469	A:0.000004:1:TOPMED|A:0.:0:ALFA
21	31665826	G>A	snv	1165252553		by-frequency;by-alfa;by-cluster	intron_variant	SOD1	A:0.000007:1:GnomAD_genomes|A:0.000004:1:TOPMED|A:0.:0:ALFA
21	31664909	C>T	snv	1165302229		by-frequency;by-alfa;by-cluster	downstream_transcript_variant;intron_variant;500B_downstream_variant	SOD1;LOC124900469	T:0.000007:1:GnomAD_genomes|T:0.000011:3:TOPMED|T:0.:0:ALFA
21	31660180	C>G,T	snv	1165450648		by-frequency;by-alfa;by-cluster	intron_variant	SOD1	G:0.000013:2:GnomAD_genomes|G:0.000004:1:TOPMED|T:0.:0:ALFA
21	31666755	A>G	snv	1165608606		by-frequency;by-alfa	intron_variant	SOD1	G:0.000004:1:TOPMED|G:0.:0:ALFA
21	31663917	C>G	snv	1165723450		by-frequency;by-alfa;by-cluster	2KB_upstream_variant;upstream_transcript_variant;intron_variant	SOD1;LOC124900469	G:0.000007:1:GnomAD_genomes|G:0.000004:1:TOPMED|G:0.:0:ALFA
21	31658264	C>T	snv	1165930008		by-frequency;by-alfa;by-cluster	2KB_upstream_variant;upstream_transcript_variant	SOD1	T:0.00002:3:GnomAD_genomes|T:0.000011:3:TOPMED|T:0.:0:ALFA
21	31659162	CT>-	delins	1167332597		by-frequency;by-alfa;by-cluster	2KB_upstream_variant;upstream_transcript_variant	SOD1	-:0.00006:9:GnomAD_genomes|-:0.000026:7:TOPMED|CTCT:0.:0:ALFA
21	31660702	G>A	snv	1167446524		by-frequency;by-alfa;by-cluster	intron_variant	SOD1	A:0.000007:1:GnomAD_genomes|A:0.000004:1:TOPMED|A:0.000071:1:ALFA
21	31657964	G>A,C	snv	1167484607		by-frequency;by-alfa;by-cluster	2KB_upstream_variant;upstream_transcript_variant	SOD1	C:0.000007:1:GnomAD_genomes|C:0.:0:ALFA
21	31667477	C>G	snv	1167557568		by-frequency;by-alfa;by-cluster	intron_variant	SOD1	G:0.000001:1:GnomAD_exomes|G:0.00002:3:GnomAD_genomes|G:0.000008:2:TOPMED|G:0.000071:1:ALFA
21	31662618	->G	delins	1167728206		by-frequency;by-alfa;by-cluster	2KB_upstream_variant;upstream_transcript_variant;intron_variant	SOD1;LOC124900469	G:0.000007:1:GnomAD_genomes|G:0.000004:1:TOPMED|GG:0.:0:ALFA
21	31658739	C>G	snv	1167793083		by-frequency;by-alfa	2KB_upstream_variant;upstream_transcript_variant	SOD1	G:0.000011:3:TOPMED|G:0.:0:ALFA
21	31657741	T>C	snv	1167915588		by-frequency;by-alfa;by-cluster	2KB_upstream_variant;upstream_transcript_variant	SOD1	C:0.000007:1:GnomAD_genomes|C:0.000013:1:TOMMO|C:0.000008:2:TOPMED|C:0.:0:ALFA
21	31669263	TCTA>-,TCTATCTA	delins	1168054045		by-frequency;by-alfa;by-cluster	downstream_transcript_variant;500B_downstream_variant	SOD1	-:0.000013:2:GnomAD_genomes|TA:0.000071:1:ALFA
21	31666576	A>G	snv	1168317053		by-frequency;by-alfa	intron_variant	SOD1	G:0.:0:ALFA
21	31668610	A>G	snv	1169296240		by-frequency;by-alfa	3_prime_UTR_variant	SOD1	G:0.000004:1:TOPMED|G:0.:0:ALFA
21	31660721	->T	delins	1169334534		by-frequency;by-alfa;by-cluster	intron_variant	SOD1	T:0.000446:2:Estonian|T:0.000013:2:GnomAD_genomes|TTTTTTT:0.000132:2:ALFA
21	31660034	G>A,T	snv	1169436804		by-frequency;by-alfa;by-cluster	intron_variant	SOD1	T:0.000008:2:TOPMED|T:0.:0:ALFA
21	31668505	G>A	snv	1169621300		by-frequency;by-alfa;by-cluster	missense_variant;coding_sequence_variant	SOD1	A:0.0000043:6:GnomAD_exomes|A:0.0000067:1:GnomAD_genomes|A:0.0000038:1:TOPMED|A:0.:0:ALFA
21	31663480	G>A	snv	1169852606		by-frequency;by-alfa	2KB_upstream_variant;upstream_transcript_variant;intron_variant	SOD1;LOC124900469	A:0.000004:1:TOPMED|A:0.:0:ALFA
21	31664049	T>C	snv	1170042009		by-frequency;by-alfa	2KB_upstream_variant;upstream_transcript_variant;intron_variant	SOD1;LOC124900469	C:0.:0:ALFA
21	31665975	T>C,G	snv	1171111973		by-frequency;by-alfa;by-cluster	intron_variant	SOD1	G:0.000015:2:GnomAD_genomes|G:0.000168:13:TOMMO|G:0.000054:1:ALFA
21	31658624	G>A	snv	1171408333		by-frequency;by-alfa;by-cluster	2KB_upstream_variant;upstream_transcript_variant	SOD1	A:0.000013:2:GnomAD_genomes|A:0.000008:2:TOPMED|A:0.:0:ALFA
21	31663220	A>G	snv	1171596575		by-frequency;by-alfa	2KB_upstream_variant;upstream_transcript_variant;intron_variant	SOD1;LOC124900469	G:0.000004:1:TOPMED|G:0.:0:ALFA
21	31657865	G>A	snv	1171976741		by-frequency;by-alfa	2KB_upstream_variant;upstream_transcript_variant	SOD1	A:0.000007:1:GnomAD_genomes|A:0.:0:ALFA
21	31658105	C>T	snv	1172422305		by-frequency;by-alfa;by-cluster	2KB_upstream_variant;upstream_transcript_variant	SOD1	T:0.000007:1:GnomAD_genomes|T:0.000004:1:TOPMED|T:0.:0:ALFA
21	31659232	T>C	snv	1172519962		by-frequency;by-alfa;by-cluster	2KB_upstream_variant;upstream_transcript_variant	SOD1	C:0.000007:1:GnomAD_genomes|C:0.000004:1:TOPMED|C:0.:0:ALFA
21	31658421	G>A	snv	1172684078		by-frequency;by-alfa;by-cluster	2KB_upstream_variant;upstream_transcript_variant	SOD1	A:0.000013:2:GnomAD_genomes|A:0.000008:2:TOPMED|A:0.:0:ALFA
21	31664385	T>C	snv	1172835122		by-frequency;by-alfa;by-cluster	non_coding_transcript_variant;intron_variant	SOD1;LOC124900469	C:0.000007:1:GnomAD_genomes|C:0.000008:2:TOPMED|C:0.:0:ALFA
21	31659064	A>C,G	snv	1173006147		by-frequency;by-alfa;by-cluster	2KB_upstream_variant;upstream_transcript_variant	SOD1	G:0.000007:1:GnomAD_genomes|C:0.000013:1:TOMMO|G:0.000004:1:TOPMED|G:0.:0:ALFA
21	31660078	C>T	snv	1173309304		by-frequency;by-alfa;by-cluster	intron_variant	SOD1	T:0.000893:4:Estonian|T:0.00004:6:GnomAD_genomes|T:0.000008:2:TOPMED|T:0.000264:4:ALFA
21	31663011	C>G	snv	1173719571		by-frequency;by-cluster	2KB_upstream_variant;upstream_transcript_variant;intron_variant	SOD1;LOC124900469	G:0.00094:73:TOMMO
21	31668569	C>T	snv	1173749241		by-frequency;by-alfa;by-cluster	synonymous_variant;coding_sequence_variant	SOD1	T:0.000005:7:GnomAD_exomes|T:0.0000067:1:GnomAD_genomes|T:0.:0:ALFA
21	31665609	T>A	snv	1173759695		by-frequency;by-alfa	intron_variant	SOD1	A:0.000004:1:TOPMED|A:0.:0:ALFA
21	31659949	T>C,G	snv	1173874502		by-frequency;by-alfa;by-cluster	intron_variant	SOD1	C:0.000004:4:GnomAD_exomes|G:0.000011:3:TOPMED|G:0.:0:ALFA
21	31664657	G>A	snv	1173879437		by-frequency;by-alfa;by-cluster	downstream_transcript_variant;intron_variant;500B_downstream_variant	SOD1;LOC124900469	A:0.000007:1:GnomAD_genomes|A:0.000019:5:TOPMED|A:0.:0:ALFA
21	31659872	G>C	snv	1174352339		by-frequency;by-alfa;by-cluster	intron_variant	SOD1	C:0.0002232:1:Estonian|C:0.0000014:2:GnomAD_exomes|C:0.0002237:1:ALFA
21	31659697	C>G,T	snv	1175200272		by-frequency;by-alfa;by-cluster	5_prime_UTR_variant	SOD1	T:0.000008:2:TOPMED|T:0.:0:ALFA
21	31663157	C>T	snv	1175250999			2KB_upstream_variant;upstream_transcript_variant;intron_variant	SOD1;LOC124900469
21	31665255	G>C	snv	1175606489		by-frequency;by-cluster	intron_variant	SOD1	C:0.000007:1:GnomAD_genomes
21	31662914	C>A	snv	1175927247		by-frequency;by-alfa	2KB_upstream_variant;upstream_transcript_variant;intron_variant	SOD1;LOC124900469	A:0.000004:1:TOPMED|A:0.:0:ALFA
21	31665331	C>A,G	snv	1176162833		by-frequency;by-alfa;by-cluster	intron_variant	SOD1	A:0.000007:1:GnomAD_genomes|A:0.000011:3:TOPMED|G:0.:0:ALFA
21	31668917	TTCAAA>-	delins	1176283916		by-frequency;by-alfa	3_prime_UTR_variant	SOD1	-:0.000004:1:TOPMED|CAAA:0.:0:ALFA
21	31667949	C>-	delins	1176350747		by-frequency;by-alfa;by-cluster	intron_variant	SOD1	-:0.000007:1:GnomAD_genomes|-:0.000004:1:TOPMED|CC:0.:0:ALFA
21	31666915	AT>-	delins	1176375527		by-frequency;by-alfa;by-cluster	intron_variant	SOD1	-:0.000009:2:GnomAD_exomes|-:0.000007:1:GnomAD_genomes|-:0.000015:4:TOPMED|T:0.:0:ALFA
21	31668091	T>C	snv	1176377032		by-frequency;by-alfa	intron_variant	SOD1	C:0.000008:2:TOPMED|C:0.000071:1:ALFA
21	31658208	A>G	snv	1176793627		by-frequency;by-alfa	2KB_upstream_variant;upstream_transcript_variant	SOD1	G:0.000008:2:TOPMED|G:0.:0:ALFA
21	31664250	T>C,G	snv	1176949517		by-frequency;by-alfa;by-cluster	2KB_upstream_variant;upstream_transcript_variant;intron_variant	SOD1;LOC124900469	C:0.000007:1:GnomAD_exomes|G:0.000684:53:TOMMO|G:0.:0:ALFA
21	31664566	A>T	snv	1177114439		by-frequency;by-cluster	downstream_transcript_variant;intron_variant;500B_downstream_variant	SOD1;LOC124900469	T:0.0005:1:Korea1K|T:0.0003:2:Korea4K
21	31667412	C>T	snv	1177214502		by-frequency;by-cluster	intron_variant	SOD1	T:0.0000009:1:GnomAD_exomes
21	31666946	T>C	snv	1177598696		by-frequency;by-alfa;by-cluster	intron_variant	SOD1	C:0.000004:1:GnomAD_exomes|C:0.00004:6:GnomAD_genomes|C:0.000023:6:TOPMED|C:0.:0:ALFA
21	31660892	T>A	snv	1177648541			intron_variant	SOD1
21	31663384	A>G	snv	1177652336		by-frequency;by-alfa;by-cluster	2KB_upstream_variant;upstream_transcript_variant;intron_variant	SOD1;LOC124900469	G:0.000013:2:GnomAD_genomes|G:0.000008:2:TOPMED|G:0.:0:ALFA
21	31659505	G>T	snv	1177704433		by-frequency;by-alfa;by-cluster	2KB_upstream_variant;upstream_transcript_variant	SOD1	T:0.000007:1:GnomAD_genomes|T:0.:0:ALFA
21	31663264	C>G,T	snv	1178124966		by-frequency;by-alfa;by-cluster	intron_variant;upstream_transcript_variant;2KB_upstream_variant	SOD1;LOC124900469	T:0.0089:57:1000Genomes_30X|T:0.01027:46:Estonian|T:0.07426:217:KOREAN|T:0.005:3:NorthernSweden|T:0.00258:42:ALFA
21	31660449	G>-	del	1178213690		by-frequency;by-alfa;by-cluster	intron_variant	SOD1	-:0.00002:3:GnomAD_genomes|-:0.:0:ALFA
21	31667580	C>G	snv	1178265587		by-frequency;by-alfa;by-cluster	intron_variant	SOD1	G:0.000013:2:GnomAD_genomes|G:0.000008:2:TOPMED|G:0.:0:ALFA
21	31661311	A>G	snv	1178348976		by-frequency;by-alfa;by-cluster	intron_variant	SOD1	G:0.000027:4:GnomAD_genomes|G:0.000008:2:TOPMED|G:0.:0:ALFA
21	31665439	C>T	snv	1178703898		by-frequency;by-alfa;by-cluster	intron_variant	SOD1	T:0.000007:1:GnomAD_genomes|T:0.000004:1:TOPMED|T:0.:0:ALFA
21	31659705	C>T	snv	1178919912		by-frequency;by-alfa;by-cluster	5_prime_UTR_variant	SOD1	T:0.0000052:7:GnomAD_exomes|T:0.0000067:1:GnomAD_genomes|T:0.0000076:2:TOPMED|T:0.:0:ALFA
21	31657929	C>T	snv	1178993144		by-frequency;by-alfa;by-cluster	upstream_transcript_variant;2KB_upstream_variant	SOD1	T:0.000007:1:GnomAD_genomes|T:0.000004:1:TOPMED|T:0.:0:ALFA
21	31667628	A>G	snv	1180070660		by-frequency;by-alfa;by-cluster	intron_variant	SOD1	G:0.000546:1:Korea1K|G:0.000415:3:Korea4K|G:0.000011:3:TOPMED|G:0.:0:ALFA
21	31668473	C>A	snv	1180155915		by-frequency;by-cluster	synonymous_variant;coding_sequence_variant	SOD1	A:0.0000007:1:GnomAD_exomes|A:0.0000258:2:TOMMO
21	31662153	T>C,G	snv	1180900291		by-frequency;by-alfa;by-cluster	intron_variant	SOD1	C:0.000007:1:GnomAD_genomes|C:0.000023:6:TOPMED|C:0.:0:ALFA
21	31665700	G>A	snv	1181059369		by-frequency;by-alfa;by-cluster	intron_variant	SOD1	A:0.000013:2:GnomAD_genomes|A:0.000008:2:TOPMED|A:0.:0:ALFA
21	31658429	G>A	snv	1181128729		by-frequency;by-alfa	upstream_transcript_variant;2KB_upstream_variant	SOD1	A:0.000004:1:TOPMED|A:0.:0:ALFA
21	31658880	C>G,T	snv	1181163627		by-frequency;by-alfa;by-cluster	upstream_transcript_variant;2KB_upstream_variant	SOD1	T:0.000026:7:TOPMED|T:0.:0:ALFA
21	31667059	G>C	snv	1181207550		by-frequency;by-alfa	intron_variant	SOD1	C:0.:0:ALFA
21	31660932	T>C	snv	1181346938		by-frequency;by-alfa;by-cluster	intron_variant	SOD1	C:0.000156:1:1000Genomes_30X|C:0.000007:1:GnomAD_genomes|C:0.000008:2:TOPMED|C:0.:0:ALFA
21	31661873	A>G	snv	1181556415		by-frequency;by-alfa;by-cluster	intron_variant	SOD1	G:0.000007:1:GnomAD_genomes|G:0.000004:1:TOPMED|G:0.:0:ALFA
21	31663502	C>G,T	snv	1181628337		by-frequency;by-alfa;by-cluster	intron_variant;upstream_transcript_variant;2KB_upstream_variant	SOD1;LOC124900469	T:0.000007:1:GnomAD_genomes|T:0.:0:ALFA
21	31664569	G>A	snv	1181644766		by-frequency;by-alfa;by-cluster	500B_downstream_variant;intron_variant;downstream_transcript_variant	SOD1;LOC124900469	A:0.000007:1:GnomAD_genomes|A:0.000004:1:TOPMED|A:0.:0:ALFA
21	31668044	CTTA>-	delins	1181648465		by-frequency;by-alfa;by-cluster	intron_variant	SOD1	-:0.00002:3:GnomAD_genomes|-:0.000004:1:TOPMED|CTTACTTA:0.:0:ALFA
21	31660761	A>G	snv	1182020471		by-frequency;by-alfa;by-cluster	intron_variant	SOD1	G:0.000007:1:GnomAD_genomes|G:0.000004:1:TOPMED|G:0.:0:ALFA
21	31659826	C>G,T	snv	1182088847		by-frequency;by-cluster	missense_variant;synonymous_variant;coding_sequence_variant	SOD1	T:0.0014:4:KOREAN
21	31667169	->TA	delins	1182140541		by-frequency;by-alfa;by-cluster	intron_variant	SOD1	TA:0.000014:11:GnomAD_exomes|TA:0.00006:9:GnomAD_genomes|TA:0.000049:13:TOPMED|TATA:0.000071:1:ALFA
21	31660686	ATCAAAACCTG>-	del	1182184142		by-frequency;by-alfa;by-cluster	intron_variant	SOD1	-:0.00002:3:GnomAD_genomes|-:0.000057:15:TOPMED|-:0.:0:ALFA
21	31658311	A>C	snv	1182489209		by-frequency;by-alfa;by-cluster	upstream_transcript_variant;2KB_upstream_variant	SOD1	C:0.00002:3:GnomAD_genomes|C:0.000008:2:TOPMED|C:0.:0:ALFA
21	31669048	C>T	snv	1182722970		by-frequency;by-alfa	500B_downstream_variant;downstream_transcript_variant	SOD1	T:0.:0:ALFA
21	31661982	C>G	snv	1182934330		by-frequency;by-alfa;by-cluster	intron_variant	SOD1	G:0.000013:2:GnomAD_genomes|G:0.000008:2:TOPMED|G:0.:0:ALFA
21	31661041	A>G	snv	1183008573		by-frequency;by-alfa;by-cluster	intron_variant	SOD1	G:0.000007:1:GnomAD_genomes|G:0.000008:2:TOPMED|G:0.:0:ALFA
21	31662817	A>G	snv	1183066452		by-frequency;by-alfa	intron_variant;upstream_transcript_variant;2KB_upstream_variant	SOD1;LOC124900469	G:0.:0:ALFA
21	31661354	A>G	snv	1183328232		by-frequency;by-alfa	intron_variant	SOD1	G:0.000015:4:TOPMED|G:0.:0:ALFA
21	31664708	T>C	snv	1183398001		by-frequency;by-cluster	500B_downstream_variant;intron_variant;downstream_transcript_variant	SOD1;LOC124900469	C:0.000013:2:GnomAD_genomes
21	31666904	A>G	snv	1183685037		by-frequency;by-alfa;by-cluster	intron_variant	SOD1	G:0.000004:1:GnomAD_exomes|G:0.000013:2:GnomAD_genomes|G:0.000015:4:TOPMED|G:0.:0:ALFA
21	31659300	G>A	snv	1184004257		by-frequency;by-alfa;by-cluster	upstream_transcript_variant;2KB_upstream_variant	SOD1	A:0.000013:2:GnomAD_genomes|A:0.000008:2:TOPMED|A:0.000071:1:ALFA
21	31669134	G>T	snv	1184531747		by-frequency;by-alfa;by-cluster	500B_downstream_variant;downstream_transcript_variant	SOD1	T:0.000013:2:GnomAD_genomes|T:0.000011:3:TOPMED|T:0.:0:ALFA
21	31660326	C>G,T	snv	1185334777		by-frequency;by-alfa;by-cluster	intron_variant	SOD1	G:0.000013:2:GnomAD_genomes|T:0.000065:5:TOMMO|G:0.000008:2:TOPMED|G:0.:0:ALFA
21	31666614	T>A,C	snv	1185495116		by-frequency;by-alfa;by-cluster	intron_variant	SOD1	C:0.00002:3:GnomAD_genomes|C:0.000015:4:TOPMED|C:0.:0:ALFA
21	31664408	C>T	snv	1186324983		by-frequency;by-alfa;by-cluster	intron_variant;non_coding_transcript_variant	SOD1;LOC124900469	T:0.000007:1:GnomAD_genomes|T:0.000026:2:TOMMO|T:0.000004:1:TOPMED|T:0.:0:ALFA
21	31663364	TGTATATTCA>-	delins	1186389069		by-frequency;by-alfa	intron_variant;upstream_transcript_variant;2KB_upstream_variant	SOD1;LOC124900469	-:0.000019:5:TOPMED|CA:0.:0:ALFA
21	31667978	T>C	snv	1187734876		by-frequency;by-alfa	intron_variant	SOD1	C:0.000008:2:TOPMED|C:0.:0:ALFA
21	31666953	A>G	snv	1187861029		by-frequency;by-alfa;by-cluster	intron_variant	SOD1	G:0.000004:1:GnomAD_exomes|G:0.00002:3:GnomAD_genomes|G:0.000023:6:TOPMED|G:0.:0:ALFA
21	31666951	T>A,G	snv	1188000572		by-frequency;by-alfa;by-cluster	intron_variant	SOD1	A:0.000004:1:GnomAD_exomes|G:0.000013:2:GnomAD_genomes|G:0.000004:1:TOPMED|G:0.:0:ALFA
21	31664847	A>C,G	snv	1188011987		by-frequency;by-cluster	500B_downstream_variant;intron_variant;downstream_transcript_variant	SOD1;LOC124900469	G:0.000007:1:GnomAD_genomes|C:0.001638:3:Korea1K|G:0.000968:75:TOMMO
21	31658219	C>T	snv	1188017045		by-frequency;by-alfa;by-cluster	upstream_transcript_variant;2KB_upstream_variant	SOD1	T:0.000007:1:GnomAD_genomes|T:0.000011:3:TOPMED|T:0.000071:1:ALFA
21	31664019	T>C	snv	1188459605		by-frequency;by-alfa;by-cluster	intron_variant;upstream_transcript_variant;2KB_upstream_variant	SOD1;LOC124900469	C:0.000007:1:GnomAD_genomes|C:0.000004:1:TOPMED|C:0.:0:ALFA
21	31663025	G>A,T	snv	1188529164		by-frequency;by-alfa;by-cluster	intron_variant;upstream_transcript_variant;2KB_upstream_variant	SOD1;LOC124900469	T:0.000008:1:GnomAD_genomes|T:0.000004:1:TOPMED|T:0.:0:ALFA
21	31664261	C>G	snv	1188833032		by-frequency;by-alfa;by-cluster	intron_variant;upstream_transcript_variant;2KB_upstream_variant	SOD1;LOC124900469	G:0.000008:1:GnomAD_exomes|G:0.000007:1:GnomAD_genomes|G:0.000008:2:TOPMED|G:0.:0:ALFA
21	31658760	G>A	snv	1188978930		by-frequency;by-alfa;by-cluster	upstream_transcript_variant;2KB_upstream_variant	SOD1	A:0.000007:1:GnomAD_genomes|A:0.000008:2:TOPMED|A:0.000084:1:ALFA
21	31658085	T>C,G	snv	1189017688		by-frequency;by-alfa;by-cluster	upstream_transcript_variant;2KB_upstream_variant	SOD1	C:0.000009:1:GnomAD_genomes|T:0.:0:SGDP_PRJ|G:0.:0:ALFA
21	31663122	CTTT>-	delins	1189043307		by-frequency;by-alfa;by-cluster	intron_variant;upstream_transcript_variant;2KB_upstream_variant	SOD1;LOC124900469	-:0.000009:1:GnomAD_genomes|TTT:0.000071:1:ALFA
21	31663151	G>A	snv	1189199294		by-frequency;by-alfa;by-cluster	intron_variant;upstream_transcript_variant;2KB_upstream_variant	SOD1;LOC124900469	A:0.000007:1:GnomAD_genomes|A:0.000004:1:TOPMED|A:0.:0:ALFA
21	31657875	G>A,C	snv	1189627365		by-frequency;by-alfa;by-cluster	upstream_transcript_variant;2KB_upstream_variant	SOD1	A:0.000019:5:TOPMED|C:0.:0:ALFA
21	31665719	A>C,T	snv	1189769860		by-frequency;by-alfa	intron_variant	SOD1	T:0.00004:3:TOMMO|C:0.:0:ALFA
21	31668489	G>-	del	1189788384		by-frequency;by-alfa;by-cluster	frameshift_variant;coding_sequence_variant	SOD1	-:0.000007:1:GnomAD_genomes|-:0.000004:1:TOPMED|-:0.:0:ALFA
21	31659678	A>G	snv	1190437313		by-frequency;by-alfa;by-cluster	upstream_transcript_variant;2KB_upstream_variant	SOD1	G:0.:0:GnomAD_exomes|G:0.0000038:1:TOPMED|G:0.0000712:1:ALFA
21	31668933	T>C	snv	1190495071		by-frequency;by-alfa	500B_downstream_variant;downstream_transcript_variant	SOD1	C:0.000004:1:TOPMED|C:0.:0:ALFA
21	31659996	C>G	snv	1190745599		by-frequency;by-alfa;by-cluster	intron_variant	SOD1	G:0.000013:6:GnomAD_exomes|G:0.00002:3:GnomAD_genomes|G:0.000008:2:TOPMED|G:0.:0:ALFA
21	31658415	G>A,T	snv	1190812505		by-frequency;by-alfa;by-cluster	upstream_transcript_variant;2KB_upstream_variant	SOD1	A:0.00002:3:GnomAD_genomes|A:0.000019:5:TOPMED|T:0.:0:ALFA
21	31666086	C>T	snv	1190881039		by-frequency;by-alfa;by-cluster	intron_variant	SOD1	T:0.000007:1:GnomAD_genomes|T:0.000004:1:TOPMED|T:0.:0:ALFA
21	31668825	ATGG>-	delins	1191238129		by-frequency;by-alfa	3_prime_UTR_variant	SOD1	-:0.000053:14:TOPMED|G:0.:0:ALFA
21	31665617	AATGTCATCCCCTGGTGCACAG>-	delins	1191285175		by-frequency;by-alfa	intron_variant	SOD1	-:0.000023:6:TOPMED|G:0.:0:ALFA
21	31665202	C>T	snv	1191481278		by-frequency;by-alfa;by-cluster	intron_variant	SOD1	T:0.000027:4:GnomAD_genomes|T:0.000019:5:TOPMED|T:0.000071:1:ALFA
21	31661213	T>C	snv	1191503033		by-frequency;by-alfa;by-cluster	intron_variant	SOD1	C:0.000007:1:GnomAD_genomes|C:0.000004:1:TOPMED|C:0.:0:ALFA
21	31659068	C>T	snv	1191521372		by-frequency;by-alfa;by-cluster	upstream_transcript_variant;2KB_upstream_variant	SOD1	T:0.000013:1:TOMMO|T:0.000004:1:TOPMED|T:0.:0:ALFA
21	31662035	C>T	snv	1191627250		by-frequency;by-alfa;by-cluster	intron_variant	SOD1	T:0.00002:3:GnomAD_genomes|T:0.000008:2:TOPMED|T:0.:0:ALFA
21	31659708	G>T	snv	1191634093		by-frequency;by-alfa;by-cluster	5_prime_UTR_variant	SOD1	T:0.0000156:21:GnomAD_exomes|T:0.0000134:2:GnomAD_genomes|T:0.0000113:3:TOPMED|T:0.:0:ALFA
21	31658506	A>C	snv	1192244482		by-frequency;by-alfa;by-cluster	upstream_transcript_variant;2KB_upstream_variant	SOD1	C:0.000007:1:GnomAD_genomes|C:0.000004:1:TOPMED|C:0.:0:ALFA
21	31665061	G>A	snv	1192320687		by-frequency;by-alfa	intron_variant	SOD1	A:0.000008:2:TOPMED|A:0.:0:ALFA
21	31660893	A>G	snv	1192357017		by-frequency;by-alfa;by-cluster	intron_variant	SOD1	G:0.000013:2:GnomAD_genomes|G:0.:0:ALFA
21	31658985	C>G,T	snv	1192865280		by-frequency;by-alfa;by-cluster	upstream_transcript_variant;2KB_upstream_variant	SOD1	T:0.000007:1:GnomAD_genomes|G:0.000004:1:TOPMED|T:0.:0:ALFA
21	31667738	TGTTCATTCA>-	delins	1192996776		by-frequency;by-alfa;by-cluster	intron_variant	SOD1	-:0.00008:12:GnomAD_genomes|-:0.000072:19:TOPMED|ATTCATGTTCATTCA:0.000214:3:ALFA
21	31660044	G>A	snv	1193867232		by-frequency;by-alfa;by-cluster	intron_variant	SOD1	A:0.000007:1:GnomAD_genomes|A:0.000019:5:TOPMED|A:0.:0:ALFA
21	31658806	A>C,G	snv	1193939070		by-frequency;by-alfa;by-cluster	upstream_transcript_variant;2KB_upstream_variant	SOD1	C:0.000007:1:GnomAD_genomes|G:0.000116:9:TOMMO|C:0.000071:1:ALFA
21	31657781	G>A	snv	1194015593		by-frequency;by-alfa;by-cluster	upstream_transcript_variant;2KB_upstream_variant	SOD1	A:0.000007:1:GnomAD_genomes|A:0.000004:1:TOPMED|A:0.:0:ALFA
21	31664270	G>A,T	snv	1194617346		by-frequency;by-alfa;by-cluster	intron_variant;upstream_transcript_variant;2KB_upstream_variant	SOD1;LOC124900469	T:0.000018:2:GnomAD_exomes|A:0.000007:1:GnomAD_genomes|A:0.000004:1:TOPMED|A:0.:0:ALFA
21	31659484	G>A,T	snv	1195047752		by-frequency;by-alfa;by-cluster	upstream_transcript_variant;2KB_upstream_variant	SOD1	T:0.000223:1:Estonian|A:0.000004:1:TOPMED|T:0.000054:1:ALFA
21	31663334	TT>-	del	1195292851		by-frequency;by-alfa;by-cluster	intron_variant;upstream_transcript_variant;2KB_upstream_variant	SOD1;LOC124900469	-:0.000013:2:GnomAD_genomes|-:0.000284:22:TOMMO|-:0.000071:1:ALFA
21	31660781	G>T	snv	1195307583		by-frequency;by-alfa	intron_variant	SOD1	T:0.000004:1:TOPMED|T:0.:0:ALFA
21	31664218	C>A,T	snv	1195527881		by-frequency;by-alfa;by-cluster	intron_variant;upstream_transcript_variant;2KB_upstream_variant	SOD1;LOC124900469	T:0.000007:1:GnomAD_genomes|T:0.000004:1:TOPMED|T:0.:0:ALFA
21	31660052	->CCGA	delins	1196000320		by-frequency;by-alfa;by-cluster	intron_variant	SOD1	GACC:0.000016:2:GnomAD_exomes|GACC:0.00004:6:GnomAD_genomes|GACC:0.000019:5:TOPMED|GACCGACCGA:0.:0:ALFA
21	31663514	G>A,T	snv	1196044477		by-frequency;by-alfa;by-cluster	intron_variant;upstream_transcript_variant;2KB_upstream_variant	SOD1;LOC124900469	T:0.000007:1:GnomAD_genomes|T:0.000008:2:TOPMED|T:0.:0:ALFA
21	31667179	AAGTT>-	del	1196128555		by-frequency;by-alfa;by-cluster	intron_variant	SOD1	-:0.000002:2:GnomAD_exomes|-:0.000007:1:GnomAD_genomes|-:0.000004:1:TOPMED|-:0.:0:ALFA
21	31666167	T>C	snv	1196259391		by-frequency;by-alfa;by-cluster	intron_variant	SOD1	C:0.000007:1:GnomAD_genomes|C:0.000004:1:TOPMED|C:0.:0:ALFA
21	31666044	T>G	snv	1196284682		by-frequency;by-alfa	intron_variant	SOD1	G:0.000004:1:TOPMED|G:0.:0:ALFA
21	31659544	C>T	snv	1196555686		by-frequency;by-alfa;by-cluster	upstream_transcript_variant;2KB_upstream_variant	SOD1	T:0.000008:3:GnomAD_exomes|T:0.000007:1:GnomAD_genomes|T:0.000013:1:TOMMO|T:0.000015:4:TOPMED|T:0.:0:ALFA
21	31659494	G>A,C	snv	1196721065		by-frequency;by-alfa;by-cluster	upstream_transcript_variant;2KB_upstream_variant	SOD1	C:0.000027:4:GnomAD_genomes|C:0.000023:6:TOPMED|C:0.:0:ALFA
21	31659428	C>G,T	snv	1197243636		by-frequency;by-alfa;by-cluster	upstream_transcript_variant;2KB_upstream_variant	SOD1	T:0.000004:1:GnomAD_exomes|G:0.000004:1:TOPMED|G:0.:0:ALFA
21	31667079	C>G,T	snv	1197875304		by-frequency;by-alfa;by-cluster	intron_variant	SOD1	G:0.000004:1:TOPMED|T:0.:0:ALFA
21	31660647	T>C	snv	1198077194		by-frequency;by-alfa;by-cluster	intron_variant	SOD1	C:0.000007:1:GnomAD_genomes|C:0.:0:ALFA
21	31662805	C>G	snv	1198175542		by-frequency;by-alfa;by-cluster	intron_variant;upstream_transcript_variant;2KB_upstream_variant	SOD1;LOC124900469	G:0.000007:1:GnomAD_genomes|G:0.000071:1:ALFA
21	31660060	G>A,C	snv	1198236648		by-frequency;by-alfa;by-cluster	intron_variant	SOD1	C:0.000426:33:TOMMO|A:0.000004:1:TOPMED|A:0.:0:ALFA
21	31667720	C>A	snv	1198251801		by-frequency;by-alfa;by-cluster	intron_variant	SOD1	A:0.000007:1:GnomAD_genomes|A:0.000004:1:TOPMED|A:0.:0:ALFA
21	31662650	C>G,T	snv	1198757255		by-frequency;by-alfa;by-cluster	intron_variant;upstream_transcript_variant;2KB_upstream_variant	SOD1;LOC124900469	T:0.000007:1:GnomAD_genomes|T:0.000008:2:TOPMED|T:0.:0:ALFA
21	31661704	C>T	snv	1198809044		by-frequency;by-alfa;by-cluster	intron_variant	SOD1	T:0.000007:1:GnomAD_genomes|T:0.000008:2:TOPMED|T:0.:0:ALFA
21	31667211	G>A	snv	1198897091		by-frequency;by-alfa;by-cluster	intron_variant	SOD1	A:0.0000016:2:GnomAD_exomes|A:0.0000038:1:TOPMED|A:0.:0:ALFA
21	31662830	C>G,T	snv	1199093709		by-frequency;by-alfa;by-cluster	intron_variant;upstream_transcript_variant;2KB_upstream_variant	SOD1;LOC124900469	G:0.000008:2:TOPMED|G:0.000071:1:ALFA
21	31665335	TTTT>-,T,TTT,TTTTT	delins	1199203640		by-frequency;by-alfa;by-cluster	intron_variant	SOD1	-:0.00001:1:TOMMO|TTT:0.:0:ALFA
21	31659984	G>C,T	snv	1199490456		by-frequency;by-alfa;by-cluster	intron_variant	SOD1	T:0.000019:5:TOPMED|T:0.:0:ALFA
21	31666870	A>C	snv	1199701591		by-frequency;by-alfa;by-cluster	intron_variant	SOD1	C:0.000007:1:GnomAD_genomes|C:0.000004:1:TOPMED|C:0.:0:ALFA
21	31658618	C>T	snv	1200277803		by-frequency;by-alfa;by-cluster	upstream_transcript_variant;2KB_upstream_variant	SOD1	T:0.000013:2:GnomAD_genomes|C:0.5:1:SGDP_PRJ|T:0.000004:1:TOPMED|T:0.:0:ALFA
21	31669382	ACTG>-	delins	1200824274		by-frequency;by-alfa;by-cluster	500B_downstream_variant;downstream_transcript_variant	SOD1	-:0.000013:2:GnomAD_genomes|-:0.000013:1:TOMMO|TG:0.:0:ALFA
21	31659265	A>G	snv	1200946404		by-frequency;by-alfa;by-cluster	upstream_transcript_variant;2KB_upstream_variant	SOD1	G:0.000007:1:GnomAD_genomes|G:0.000004:1:TOPMED|G:0.:0:ALFA
21	31665510	->T	delins	1200951893		by-frequency;by-alfa	intron_variant	SOD1	T:0.000008:2:TOPMED|TT:0.:0:ALFA
21	31668541	G>A	snv	1200970313		by-frequency;by-cluster	missense_variant;coding_sequence_variant	SOD1	A:0.000002:1:GnomAD_exomes
21	31658335	T>C	snv	1201006865		by-frequency;by-alfa	upstream_transcript_variant;2KB_upstream_variant	SOD1	C:0.000011:3:TOPMED|C:0.000071:1:ALFA
21	31661993	T>-	delins	1201475757		by-frequency;by-alfa;by-cluster	intron_variant	SOD1	-:0.000007:1:GnomAD_genomes|-:0.000008:2:TOPMED|TTTT:0.:0:ALFA
21	31669273	C>A	snv	1201753346		by-frequency;by-alfa;by-cluster	500B_downstream_variant;downstream_transcript_variant	SOD1	A:0.000007:1:GnomAD_genomes|A:0.000008:2:TOPMED|A:0.:0:ALFA
21	31658394	T>C	snv	1202661173		by-frequency;by-alfa;by-cluster	upstream_transcript_variant;2KB_upstream_variant	SOD1	C:0.000013:2:GnomAD_genomes|C:0.000015:4:TOPMED|C:0.000071:1:ALFA
21	31658572	G>A,C	snv	1202953171		by-frequency;by-alfa;by-cluster	upstream_transcript_variant;2KB_upstream_variant	SOD1	A:0.00016:1:1000Genomes_30X|C:0.:0:ALFA
21	31666646	A>G	snv	1202980572		by-frequency;by-alfa;by-cluster	intron_variant	SOD1	G:0.000002:1:GnomAD_exomes|G:0.000004:1:TOPMED|G:0.:0:ALFA
21	31660213	C>T	snv	1203204792		by-frequency;by-alfa;by-cluster	intron_variant	SOD1	T:0.000312:2:1000Genomes_30X|T:0.000034:5:GnomAD_genomes|T:0.001028:3:KOREAN|T:0.000546:1:Korea1K|C:0.5:2:SGDP_PRJ|T:0.000452:35:TOMMO|T:0.000057:15:TOPMED|T:0.:0:ALFA
21	31663677	C>T	snv	1203350385		by-frequency;by-alfa	intron_variant;upstream_transcript_variant;2KB_upstream_variant	SOD1;LOC124900469	T:0.000011:3:TOPMED|T:0.:0:ALFA
21	31658128	G>A,T	snv	1204683316		by-frequency;by-alfa;by-cluster	upstream_transcript_variant;2KB_upstream_variant	SOD1	A:0.000446:2:Estonian|A:0.000021:3:GnomAD_genomes|A:0.000026:2:TOMMO|T:0.000004:1:TOPMED|A:0.000108:2:ALFA
21	31663374	C>G,T	snv	1204816870		by-frequency;by-alfa;by-cluster	intron_variant;upstream_transcript_variant;2KB_upstream_variant	SOD1;LOC124900469	T:0.000013:2:GnomAD_genomes|T:0.:0:ALFA
21	31662673	C>G	snv	1204981536		by-frequency;by-alfa;by-cluster	intron_variant;upstream_transcript_variant;2KB_upstream_variant	SOD1;LOC124900469	G:0.000007:1:GnomAD_genomes|G:0.000004:1:TOPMED|G:0.:0:ALFA
21	31665866	C>T	snv	1205067937		by-frequency;by-alfa;by-cluster	intron_variant	SOD1	T:0.000312:2:1000Genomes_30X|T:0.000027:4:GnomAD_genomes|T:0.000015:4:TOPMED|T:0.:0:ALFA
21	31668264	T>C	snv	1205122722		by-frequency;by-alfa;by-cluster	intron_variant	SOD1	C:0.000007:1:GnomAD_genomes|C:0.000004:1:TOPMED|C:0.:0:ALFA
21	31660056	C>T	snv	1205356463		by-frequency;by-alfa;by-cluster	intron_variant	SOD1	T:0.000038:4:GnomAD_exomes|T:0.000011:3:TOPMED|T:0.:0:ALFA
21	31659787	G>A,T	snv	1205921696		by-frequency;by-alfa;by-cluster	synonymous_variant;coding_sequence_variant	SOD1	A:0.:0:GnomAD_exomes|T:0.0000067:1:GnomAD_genomes|T:0.:0:ALFA
21	31668160	A>G,T	snv	1205999598		by-frequency;by-alfa;by-cluster	intron_variant	SOD1	G:0.000007:1:GnomAD_genomes|T:0.:0:ALFA
21	31662010	A>T	snv	1206415749		by-frequency;by-alfa;by-cluster	intron_variant	SOD1	T:0.000004:1:TOPMED|T:0.:0:ALFA
21	31661896	G>C	snv	1206464062		by-frequency;by-alfa	intron_variant	SOD1	C:0.000004:1:TOPMED|C:0.:0:ALFA
21	31669223	C>G	snv	1206935208		by-frequency;by-alfa;by-cluster	500B_downstream_variant;downstream_transcript_variant	SOD1	G:0.000013:2:GnomAD_genomes|G:0.:0:ALFA
21	31669067	TAAC>-	delins	1207355915		by-frequency;by-alfa	500B_downstream_variant;downstream_transcript_variant	SOD1	-:0.000011:3:TOPMED|AAC:0.:0:ALFA
21	31665994	T>C	snv	1207410262		by-frequency;by-alfa	intron_variant	SOD1	C:0.:0:ALFA
21	31669150	->ATT	delins	1208647420		by-frequency;by-alfa	500B_downstream_variant;downstream_transcript_variant	SOD1	ATT:0.000004:1:TOPMED|ATTATT:0.:0:ALFA
21	31662093	A>G	snv	1208895865		by-frequency;by-alfa;by-cluster	intron_variant	SOD1	G:0.000007:1:GnomAD_genomes|G:0.000013:1:TOMMO|G:0.000004:1:TOPMED|G:0.:0:ALFA
21	31669238	T>C	snv	1209042235		by-frequency;by-alfa	500B_downstream_variant;downstream_transcript_variant	SOD1	C:0.000004:1:TOPMED|C:0.:0:ALFA
21	31663271	C>T	snv	1209254707		by-frequency;by-alfa	intron_variant;upstream_transcript_variant;2KB_upstream_variant	SOD1;LOC124900469	T:0.000014:2:GnomAD_genomes|T:0.:0:ALFA
21	31664830	A>G	snv	1209288436		by-frequency;by-cluster	500B_downstream_variant;intron_variant;downstream_transcript_variant	SOD1;LOC124900469	G:0.000007:1:GnomAD_genomes|G:0.000826:64:TOMMO
21	31668838	C>T	snv	1209758495		by-frequency;by-alfa	3_prime_UTR_variant	SOD1	T:0.000004:1:TOPMED|T:0.:0:ALFA
21	31667403	A>C,G,T	snv	1209777015		by-frequency;by-cluster	intron_variant	SOD1	T:0.00001:1:TOMMO
21	31664681	C>G,T	snv	1209807597		by-frequency;by-alfa;by-cluster	500B_downstream_variant;intron_variant;downstream_transcript_variant	SOD1;LOC124900469	T:0.000007:1:GnomAD_genomes|T:0.000026:2:TOMMO|T:0.:0:ALFA
21	31659089	T>C	snv	1210095919		by-frequency;by-alfa	upstream_transcript_variant;2KB_upstream_variant	SOD1	C:0.000004:1:TOPMED|C:0.:0:ALFA
21	31667454	C>T	snv	1210175186		by-frequency;by-alfa;by-cluster	intron_variant	SOD1	T:0.000224:1:Estonian|T:0.000008:7:GnomAD_exomes|T:0.000014:2:GnomAD_genomes|T:0.000011:3:TOPMED|T:0.000054:1:ALFA
21	31666010	T>A,C	snv	1210287026		by-frequency;by-alfa	intron_variant	SOD1	C:0.:0:ALFA
21	31658229	T>G	snv	1210369391		by-frequency;by-alfa	upstream_transcript_variant;2KB_upstream_variant	SOD1	G:0.000008:2:TOPMED|G:0.:0:ALFA
21	31668605	C>A,T	snv	1210388088		by-frequency;by-alfa;by-cluster	3_prime_UTR_variant	SOD1	T:0.00467:1:Vietnamese|T:0.:0:ALFA
21	31660400	A>G	snv	1210547968		by-frequency;by-alfa;by-cluster	intron_variant	SOD1	G:0.000223:1:Estonian|G:0.000013:2:GnomAD_genomes|G:0.000015:4:TOPMED|G:0.000054:1:ALFA
21	31662520	C>G	snv	1210740726		by-frequency;by-alfa;by-cluster	intron_variant;upstream_transcript_variant;2KB_upstream_variant	SOD1;LOC124900469	G:0.000007:1:GnomAD_genomes|G:0.000004:1:TOPMED|G:0.:0:ALFA
21	31668970	A>G	snv	1211011911		by-frequency;by-alfa	500B_downstream_variant;downstream_transcript_variant	SOD1	G:0.000004:1:TOPMED|G:0.:0:ALFA
21	31668013	C>-	del	1211155985		by-frequency;by-alfa;by-cluster	intron_variant	SOD1	-:0.000009:1:GnomAD_genomes|-:0.000008:2:TOPMED|-:0.:0:ALFA
21	31665447	CCC>-	delins	1211623144		by-frequency;by-alfa	intron_variant	SOD1	CC:0.:0:ALFA
21	31661905	C>T	snv	1211950370		by-frequency;by-alfa;by-cluster	intron_variant	SOD1	T:0.000013:2:GnomAD_genomes|T:0.00009:7:TOMMO|T:0.000008:2:TOPMED|T:0.:0:ALFA
21	31658436	A>T	snv	1212247573		by-frequency;by-alfa;by-cluster	upstream_transcript_variant;2KB_upstream_variant	SOD1	T:0.000007:1:GnomAD_genomes|T:0.000004:1:TOPMED|T:0.:0:ALFA
[truncated: 3,965 more rows]

## Sheet: SOD1_Missense
#chr	pos	variation	variant_type	snp_id	clinical_significance	validation_status	function_class	gene	frequency
21	31668533	C>A,T	snv	1804449	conflicting-interpretations-of-pathogenicity;likely-benign;pathogenic	by-frequency;by-alfa;by-cluster	synonymous_variant;coding_sequence_variant;missense_variant	SOD1	T:0.0002:1:1000Genomes|T:0.000156:1:1000Genomes_30X|T:0.000107:13:ExAC|T:0.000074:11:GnomAD_genomes|T:0.000258:20:TOMMO|T:0.000079:21:TOPMED|T:0.000027:2:ALFA
21	31667278	A>G,T	snv	11556620	pathogenic	by-frequency;by-alfa;by-cluster	coding_sequence_variant;missense_variant	SOD1	G:0.0000014:2:GnomAD_exomes|G:0.0000387:3:TOMMO|G:0.:0:ALFA
21	31667356	T>C	snv	74315452	pathogenic	by-frequency;by-alfa;by-cluster	coding_sequence_variant;missense_variant	SOD1	C:0.:0:PAGE_STUDY|C:0.:0:ALFA
21	31667319	G>A,T	snv	76731700	pathogenic;likely-pathogenic	by-frequency;by-alfa;by-cluster	stop_gained;coding_sequence_variant;missense_variant	SOD1	A:0.:0:ALFA
21	31667290	A>C,T	snv	80265967	conflicting-interpretations-of-pathogenicity;pathogenic;likely-pathogenic	by-frequency;by-alfa;by-cluster	coding_sequence_variant;missense_variant	SOD1	C:0.0003994:2:1000Genomes|C:0.0004685:3:1000Genomes_30X|C:0.0002595:1:ALSPAC|C:0.0020089:9:Estonian|C:0.0011216:136:ExAC|C:0.0098684:3:FINRISK|C:0.000944:1323:GnomAD_exomes|C:0.0012059:180:GnomAD_genomes|C:0.001002:1:GoNL|C:0.0016667:1:NorthernSweden|C:0.0000254:2:PAGE_STUDY|C:0.0003022:80:TOPMED|C:0.0005394:2:TWINSUK|C:0.000417:65:ALFA
21	31663829	G>A,C	snv	121912431	pathogenic	by-frequency;by-alfa;by-cluster	2KB_upstream_variant;coding_sequence_variant;missense_variant;upstream_transcript_variant	SOD1;LOC124900469	A:0.00003:2:PAGE_STUDY|A:0.:0:ALFA
21	31663832	C>G	snv	121912432	pathogenic-likely-pathogenic;likely-pathogenic	by-frequency;by-cluster	2KB_upstream_variant;coding_sequence_variant;missense_variant;upstream_transcript_variant	SOD1;LOC124900469	G:0.:0:PAGE_STUDY
21	31663841	G>A	snv	121912433	pathogenic	by-frequency;by-alfa;by-cluster	2KB_upstream_variant;coding_sequence_variant;missense_variant;upstream_transcript_variant	SOD1;LOC124900469	A:0.:0:PAGE_STUDY|A:0.000004:1:TOPMED|A:0.:0:ALFA
21	31663842	G>A	snv	121912434	pathogenic	by-frequency;by-alfa;by-cluster	2KB_upstream_variant;coding_sequence_variant;missense_variant;upstream_transcript_variant	SOD1;LOC124900469	A:0.:0:PAGE_STUDY|A:0.00004:1:ALFA
21	31663848	A>G	snv	121912435	pathogenic	by-frequency;by-alfa;by-cluster	2KB_upstream_variant;coding_sequence_variant;missense_variant;upstream_transcript_variant	SOD1;LOC124900469	G:0.000001:1:GnomAD_exomes|G:0.000013:1:PAGE_STUDY|G:0.:0:ALFA
21	31667274	G>A,C	snv	121912436	pathogenic;likely-pathogenic	by-frequency;by-alfa;by-cluster	coding_sequence_variant;missense_variant	SOD1	C:0.:0:PAGE_STUDY|A:0.:0:ALFA
21	31667298	G>A,C,T	snv	121912437	pathogenic;likely-pathogenic	by-frequency;by-alfa;by-cluster	coding_sequence_variant;missense_variant	SOD1	C:0.:0:PAGE_STUDY|T:0.:0:ALFA
21	31667299	G>A,C,T	snv	121912438	pathogenic	by-frequency;by-alfa;by-cluster	coding_sequence_variant;missense_variant	SOD1	A:0.000002:1:GnomAD_exomes|C:0.:0:PAGE_STUDY|C:0.000039:3:TOMMO|T:0.:0:ALFA
21	31667320	A>G	snv	121912439	pathogenic	by-frequency;by-alfa;by-cluster	coding_sequence_variant;missense_variant	SOD1	G:0.00001:1:PAGE_STUDY|G:0.00004:1:ALFA
21	31667337	C>G,T	snv	121912440	pathogenic	by-frequency;by-alfa;by-cluster	coding_sequence_variant;missense_variant	SOD1	T:0.:0:ALFA
21	31667359	T>C	snv	121912441	pathogenic-likely-pathogenic;pathogenic	by-frequency;by-alfa;by-cluster	coding_sequence_variant;missense_variant	SOD1	C:0.0000222:31:GnomAD_exomes|C:0.0000067:1:GnomAD_genomes|C:0.0000129:1:TOMMO|C:0.0000076:2:TOPMED|C:0.:0:ALFA
21	31659783	C>T	snv	121912442	pathogenic	by-frequency;by-alfa;by-cluster	coding_sequence_variant;missense_variant	SOD1	T:0.000003:2:GnomAD_exomes|T:0.000013:1:PAGE_STUDY|T:0.000031:1:ALFA
21	31663857	A>C,G	snv	121912443	pathogenic	by-frequency;by-alfa;by-cluster	2KB_upstream_variant;coding_sequence_variant;missense_variant;upstream_transcript_variant	SOD1;LOC124900469	C:0.000002:1:GnomAD_exomes|G:0.:0:ALFA
21	31659782	G>A,T	snv	121912444	pathogenic	by-frequency;by-alfa;by-cluster	coding_sequence_variant;missense_variant	SOD1	A:0.00001:1:PAGE_STUDY|T:0.:0:ALFA
21	31667331	A>G,T	snv	121912445	pathogenic;likely-pathogenic	by-frequency;by-cluster	coding_sequence_variant;missense_variant	SOD1	G:0.000003:2:GnomAD_exomes
21	31668547	T>C	snv	121912446	pathogenic	by-frequency;by-alfa;by-cluster	coding_sequence_variant;missense_variant	SOD1	C:0.:0:PAGE_STUDY|C:0.:0:ALFA
21	31668549	G>A	snv	121912447	likely-pathogenic	by-frequency;by-alfa;by-cluster	coding_sequence_variant;missense_variant	SOD1	A:0.00001:1:PAGE_STUDY|A:0.:0:ALFA
21	31659789	G>A,T	snv	121912448	pathogenic	by-frequency;by-alfa;by-cluster	coding_sequence_variant;missense_variant	SOD1	A:0.00001:1:TOMMO|T:0.:0:ALFA
21	31668568	T>C,G	snv	121912449	uncertain-significance;pathogenic	by-frequency;by-alfa;by-cluster	coding_sequence_variant;missense_variant	SOD1	C:0.00001:1:PAGE_STUDY|C:0.:0:ALFA
21	31659833	G>A	snv	121912450	pathogenic	by-frequency;by-alfa;by-cluster	coding_sequence_variant;missense_variant	SOD1	A:0.:0:PAGE_STUDY|A:0.:0:ALFA
21	31668517	G>A,C	snv	121912451	pathogenic	by-frequency;by-alfa;by-cluster	coding_sequence_variant;missense_variant	SOD1	A:0.0000082:1:ExAC|A:0.0000007:1:GnomAD_exomes|A:0.0000254:2:PAGE_STUDY|A:0.0000388:3:TOMMO|A:0.:0:ALFA
21	31667271	T>C,G	snv	121912452	likely-benign;pathogenic	by-frequency;by-alfa;by-cluster	coding_sequence_variant;missense_variant;synonymous_variant	SOD1	C:0.000008:1:ExAC|C:0.000002:1:GnomAD_exomes|C:0.000013:2:GnomAD_genomes|C:0.000684:2:KOREAN|G:0.000051:4:PAGE_STUDY|C:0.000004:1:TOPMED|G:0.00002:1:ALFA
21	31659818	G>A,T	snv	121912453	pathogenic;likely-pathogenic	by-frequency;by-alfa;by-cluster	coding_sequence_variant;missense_variant	SOD1	A:0.:0:PAGE_STUDY|A:0.:0:ALFA
21	31668493	T>A,C	snv	121912454	pathogenic	by-frequency;by-alfa;by-cluster	stop_gained;coding_sequence_variant;missense_variant	SOD1	A:0.:0:PAGE_STUDY|C:0.:0:ALFA
21	31666496	G>A,T	snv	121912455	likely-pathogenic	by-frequency;by-alfa;by-cluster	coding_sequence_variant;missense_variant	SOD1	A:0.000009:1:ExAC|A:0.000013:1:PAGE_STUDY|T:0.:0:ALFA
21	31659806	G>A,C	snv	121912456	likely-pathogenic	by-frequency;by-cluster	coding_sequence_variant;missense_variant	SOD1	A:0.000002:1:GnomAD_exomes|C:0.:0:PAGE_STUDY
21	31663854	T>C,G	snv	121912457	pathogenic	by-frequency;by-alfa;by-cluster	2KB_upstream_variant;coding_sequence_variant;missense_variant;upstream_transcript_variant	SOD1;LOC124900469	G:0.:0:PAGE_STUDY|G:0.:0:ALFA
21	31667260	A>G	snv	121912458	pathogenic	by-frequency;by-alfa;by-cluster	coding_sequence_variant;missense_variant	SOD1	G:0.:0:PAGE_STUDY|G:0.:0:ALFA
21	31667307	G>A,C	snv	121912459	uncertain-significance;pathogenic	by-frequency;by-alfa;by-cluster	coding_sequence_variant;missense_variant	SOD1	A:0.000033:4:ExAC|A:0.000342:1:KOREAN|A:0.000013:1:PAGE_STUDY|A:0.000004:1:TOPMED|A:0.000008:1:ALFA
21	31667370	C>G	snv	199474723	uncertain-significance;pathogenic-likely-pathogenic	by-cluster	coding_sequence_variant;missense_variant	SOD1
21	31666495	C>A,G,T	snv	368042695	uncertain-significance;likely-benign	by-frequency;by-alfa;by-cluster	coding_sequence_variant;synonymous_variant;missense_variant	SOD1	T:0.00007:8:ExAC|T:0.00002:3:GnomAD_genomes|T:0.000154:2:GoESP|T:0.000013:1:TOMMO|T:0.000015:4:TOPMED|T:0.000023:1:ALFA
21	31667346	G>A,T	snv	567432143	uncertain-significance	by-frequency;by-alfa;by-cluster	coding_sequence_variant;missense_variant	SOD1	T:0.:0:ALSPAC|T:0.0000082:1:ExAC|T:0.0000385:54:GnomAD_exomes|T:0.0000067:1:GnomAD_genomes|T:0.001002:1:GoNL|T:0.0000113:3:TOPMED|T:0.0002697:1:TWINSUK|T:0.:0:ALFA
21	31668558	G>A	snv	567511139	likely-pathogenic	by-frequency;by-alfa;by-cluster	coding_sequence_variant;missense_variant	SOD1	A:0.0003994:2:1000Genomes|A:0.0003123:2:1000Genomes_30X|A:0.0000247:3:ExAC|A:0.0000021:3:GnomAD_exomes|A:0.0000201:3:GnomAD_genomes|A:0.:0:ALFA
21	31668570	G>A	snv	747094021	uncertain-significance	by-frequency;by-alfa;by-cluster	coding_sequence_variant;missense_variant	SOD1	A:0.0000247:3:ExAC|A:0.00001:14:GnomAD_exomes|A:0.0000113:3:TOPMED|A:0.0000508:1:ALFA
21	31667360	T>G	snv	750335577	likely-pathogenic	by-frequency;by-cluster	coding_sequence_variant;missense_variant	SOD1	G:0.0000082:1:ExAC|G:0.0000014:2:GnomAD_exomes
21	31659803	G>A,T	snv	762628133	likely-pathogenic	by-frequency;by-alfa;by-cluster	coding_sequence_variant;missense_variant	SOD1	T:0.000008:1:ExAC|T:0.000007:1:GnomAD_genomes|T:0.000011:3:TOPMED|T:0.:0:ALFA
21	31659828	A>G,T	snv	768029813	uncertain-significance;likely-benign	by-frequency;by-alfa;by-cluster	coding_sequence_variant;missense_variant	SOD1	G:0.0012974:5:ALSPAC|G:0.0000834:10:ExAC|G:0.0000792:111:GnomAD_exomes|G:0.0000469:7:GnomAD_genomes|G:0.0000491:13:TOPMED|G:0.0005394:2:TWINSUK|G:0.000107:7:ALFA
21	31667296	A>G,T	snv	774994509	uncertain-significance	by-frequency;by-alfa;by-cluster	coding_sequence_variant;missense_variant	SOD1	G:0.0000082:1:ExAC|G:0.000005:7:GnomAD_exomes|G:0.0000038:1:TOPMED|G:0.0000712:1:ALFA
21	31668509	T>C,G	snv	1027128618	likely-pathogenic	by-frequency;by-alfa;by-cluster	synonymous_variant;missense_variant;coding_sequence_variant	SOD1	C:0.0000007:1:GnomAD_exomes|C:0.0000067:1:GnomAD_genomes|C:0.0000113:3:TOPMED|C:0.:0:ALFA
21	31666472	T>C	snv	1030039318	uncertain-significance;conflicting-interpretations-of-pathogenicity	by-frequency;by-alfa;by-cluster	missense_variant;coding_sequence_variant	SOD1	C:0.000013:2:GnomAD_genomes|C:0.000011:3:TOPMED|C:0.000033:1:ALFA
21	31663823	A>T	snv	1057524474	uncertain-significance	by-cluster	2KB_upstream_variant;missense_variant;upstream_transcript_variant;coding_sequence_variant	SOD1;LOC124900469
21	31668550	C>A,G,T	snv	1131690781	likely-pathogenic	by-cluster	missense_variant;coding_sequence_variant	SOD1
21	31668490	A>C	snv	1164911383	likely-pathogenic	by-cluster	missense_variant;coding_sequence_variant	SOD1
21	31659837	A>C,G,T	snv	1169198442	likely-pathogenic;pathogenic-likely-pathogenic	by-frequency;by-alfa;by-cluster	missense_variant;coding_sequence_variant	SOD1	G:0.000002:1:GnomAD_exomes|G:0.000007:1:GnomAD_genomes|G:0.000004:1:TOPMED|G:0.:0:ALFA
21	31668561	A>G	snv	1169917994	uncertain-significance	by-frequency;by-cluster	missense_variant;coding_sequence_variant	SOD1	G:0.0000014:2:GnomAD_exomes
21	31659819	G>C,T	snv	1200906022	pathogenic;pathogenic-likely-pathogenic	by-frequency;by-cluster	missense_variant;coding_sequence_variant	SOD1	T:0.000001:1:GnomAD_exomes
21	31659813	T>C,G	snv	1202989817	likely-pathogenic	by-frequency;by-alfa;by-cluster	missense_variant;coding_sequence_variant	SOD1	C:0.000008:5:GnomAD_exomes|C:0.000007:1:GnomAD_genomes|C:0.001375:4:KOREAN|C:0.000139:1:Korea4K|C:0.000297:23:TOMMO|C:0.000004:1:TOPMED|G:0.:0:ALFA
21	31667373	G>C,T	snv	1235629842	uncertain-significance	by-frequency;by-alfa;by-cluster	missense_variant;coding_sequence_variant	SOD1	T:0.:0:ALFA
21	31667365	G>A	snv	1240334553	uncertain-significance;likely-pathogenic	by-frequency;by-alfa;by-cluster	missense_variant;coding_sequence_variant	SOD1	A:0.0000014:2:GnomAD_exomes|A:0.0000067:1:GnomAD_genomes|A:0.0000076:2:TOPMED|A:0.:0:ALFA
21	31667287	C>T	snv	1280042397	likely-pathogenic;pathogenic	by-frequency;by-alfa;by-cluster	missense_variant;coding_sequence_variant	SOD1	T:0.000012:7:GnomAD_exomes|T:0.000007:1:GnomAD_genomes|T:0.:0:ALFA
21	31667364	C>G,T	snv	1301635320	uncertain-significance;pathogenic-likely-pathogenic;pathogenic;likely-pathogenic	by-frequency;by-alfa;by-cluster	coding_sequence_variant;missense_variant	SOD1	T:0.0000057:8:GnomAD_exomes|T:0.0000076:2:TOPMED|T:0.:0:ALFA
21	31659788	T>A,G	snv	1312702973	likely-pathogenic;pathogenic	by-frequency;by-alfa;by-cluster	coding_sequence_variant;missense_variant	SOD1	G:0.:0:ALFA
21	31667273	G>C	snv	1315541036	pathogenic	by-cluster	coding_sequence_variant;missense_variant	SOD1
21	31667281	T>C	snv	1339283341	likely-pathogenic	by-frequency;by-alfa;by-cluster	coding_sequence_variant;missense_variant	SOD1	C:0.:0:ALFA
21	31667335	C>G,T	snv	1378590183	pathogenic	by-frequency;by-cluster	missense_variant;coding_sequence_variant;stop_gained	SOD1	G:0.000003:2:GnomAD_exomes|G:0.000026:2:TOMMO
21	31668475	A>G,T	snv	1410925719	uncertain-significance	by-frequency;by-cluster	coding_sequence_variant;missense_variant	SOD1	G:0.000003:2:GnomAD_exomes
21	31666458	G>A,T	snv	1413388444	uncertain-significance	by-frequency;by-alfa;by-cluster	coding_sequence_variant;missense_variant	SOD1	T:0.0000007:1:GnomAD_exomes|A:0.0000067:1:GnomAD_genomes|A:0.0000038:1:TOPMED|T:0.0000814:3:ALFA
21	31668562	T>A,C,G	snv	1424014997	likely-pathogenic;pathogenic;pathogenic-likely-pathogenic	by-frequency;by-alfa;by-cluster	coding_sequence_variant;missense_variant	SOD1	C:0.:0:ALFA
21	31659838	G>A,C,T	snv	1424217272	likely-pathogenic	by-frequency;by-cluster	coding_sequence_variant;synonymous_variant;missense_variant	SOD1	C:0.00003:2:TOMMO
21	31663812	T>C,G	snv	1428716759	likely-pathogenic;uncertain-significance	by-frequency;by-alfa;by-cluster	2KB_upstream_variant;coding_sequence_variant;upstream_transcript_variant;missense_variant	SOD1;LOC124900469	G:0.000007:1:GnomAD_genomes|G:0.000004:1:TOPMED|G:0.:0:ALFA
21	31666487	A>G	snv	1457291290	uncertain-significance	by-frequency;by-alfa;by-cluster	missense_variant;coding_sequence_variant	SOD1	G:0.000004:1:TOPMED|G:0.:0:ALFA
21	31668471	G>C	snv	1457889952	likely-pathogenic	by-frequency;by-cluster	missense_variant;coding_sequence_variant	SOD1	C:0.000003:2:GnomAD_exomes
21	31668501	G>A,C	snv	1464048449	uncertain-significance	by-frequency;by-alfa;by-cluster	missense_variant;coding_sequence_variant	SOD1	A:0.000005:7:GnomAD_exomes|A:0.0000201:3:GnomAD_genomes|A:0.0000113:3:TOPMED|A:0.:0:ALFA
21	31668559	T>G	snv	1476760624	pathogenic-likely-pathogenic	by-cluster	missense_variant;coding_sequence_variant	SOD1
21	31668548	G>C,T	snv	1482760341	pathogenic	by-frequency;by-alfa;by-cluster	missense_variant;coding_sequence_variant	SOD1	C:0.000004:1:TOPMED|T:0.:0:ALFA
21	31659831	T>G	snv	1555836169	pathogenic		missense_variant;coding_sequence_variant	SOD1
21	31659832	C>G	snv	1555836170	likely-pathogenic	by-frequency;by-cluster	missense_variant;coding_sequence_variant	SOD1	G:0.:0:GnomAD_exomes
21	31663833	T>A,G	snv	1555836520	likely-pathogenic	by-frequency;by-alfa;by-cluster	upstream_transcript_variant;missense_variant;coding_sequence_variant;2KB_upstream_variant	SOD1;LOC124900469	G:0.00004:1:ALFA
21	31666499	G>A	snv	1555836720	uncertain-significance		missense_variant;coding_sequence_variant	SOD1
21	31667308	A>T	snv	1555836803	likely-pathogenic	by-frequency;by-cluster	missense_variant;coding_sequence_variant	SOD1	T:0.0000014:2:GnomAD_exomes
21	31667310	G>A,C	snv	1555836806	uncertain-significance	by-frequency;by-alfa;by-cluster	missense_variant;coding_sequence_variant	SOD1	A:0.000002:1:GnomAD_exomes|A:0.000007:1:GnomAD_genomes|C:0.000004:1:TOPMED|C:0.:0:ALFA
21	31668535	C>G	snv	1555836937	uncertain-significance		missense_variant;coding_sequence_variant	SOD1
21	31668556	G>A	snv	1555836950	likely-pathogenic;pathogenic	by-frequency;by-alfa	missense_variant;coding_sequence_variant	SOD1	A:0.:0:ALFA
21	31659779	A>G	snv	1568807297	pathogenic	by-frequency;by-alfa;by-cluster	missense_variant;coding_sequence_variant	SOD1	G:0.000002:1:GnomAD_exomes|G:0.:0:ALFA
21	31659785	G>A,C,T	snv	1568807314	uncertain-significance	by-frequency;by-alfa;by-cluster	missense_variant;coding_sequence_variant	SOD1	C:0.0000021:3:GnomAD_exomes|T:0.:0:ALFA
21	31659794	C>G	snv	1568807333	uncertain-significance	by-frequency;by-cluster	missense_variant;coding_sequence_variant	SOD1	G:0.0000021:3:GnomAD_exomes
21	31659795	T>A	snv	1568807342	uncertain-significance		missense_variant;coding_sequence_variant	SOD1
21	31659812	G>A,C	snv	1568807400	pathogenic-likely-pathogenic;likely-pathogenic	by-frequency;by-alfa	missense_variant;coding_sequence_variant	SOD1	A:0.:0:ALFA
21	31663839	A>G	snv	1568809149	conflicting-interpretations-of-pathogenicity	by-frequency;by-alfa	upstream_transcript_variant;missense_variant;coding_sequence_variant;2KB_upstream_variant	SOD1;LOC124900469	G:0.:0:ALFA
21	31663860	T>C	snv	1568809169	likely-pathogenic	by-frequency;by-alfa	upstream_transcript_variant;missense_variant;coding_sequence_variant;2KB_upstream_variant	SOD1;LOC124900469	C:0.:0:ALFA
21	31663863	A>G	snv	1568809172	likely-pathogenic;pathogenic	by-frequency;by-alfa	upstream_transcript_variant;missense_variant;coding_sequence_variant;2KB_upstream_variant	SOD1;LOC124900469	G:0.:0:ALFA
21	31663865	G>A,T	snv	1568809178	uncertain-significance	by-frequency;by-alfa;by-cluster	stop_gained;upstream_transcript_variant;coding_sequence_variant;missense_variant;2KB_upstream_variant	SOD1;LOC124900469	T:0.0000007:1:GnomAD_exomes|A:0.:0:ALFA
21	31666476	A>G	snv	1568810275	pathogenic-likely-pathogenic	by-frequency;by-alfa;by-cluster	missense_variant;coding_sequence_variant	SOD1	G:0.:0:GnomAD_exomes|G:0.000007:1:GnomAD_genomes|G:0.000004:1:TOPMED|G:0.:0:ALFA
21	31666509	A>T	snv	1568810316	pathogenic-likely-pathogenic		missense_variant;coding_sequence_variant	SOD1
21	31667280	G>A,C	snv	1568810641	likely-pathogenic	by-frequency;by-alfa;by-cluster	missense_variant;coding_sequence_variant	SOD1	C:0.0000014:2:GnomAD_exomes|A:0.:0:ALFA
21	31667286	G>A	snv	1568810660	conflicting-interpretations-of-pathogenicity;uncertain-significance	by-frequency;by-alfa;by-cluster	missense_variant;coding_sequence_variant	SOD1	A:0.000002:1:GnomAD_exomes|A:0.:0:ALFA
21	31667304	G>A	snv	1568810686	likely-pathogenic	by-frequency;by-alfa;by-cluster	missense_variant;coding_sequence_variant	SOD1	A:0.000002:1:GnomAD_exomes|A:0.:0:ALFA
21	31667305	C>G,T	snv	1568810690	uncertain-significance	by-frequency;by-alfa;by-cluster	missense_variant;coding_sequence_variant	SOD1	T:0.000005:7:GnomAD_exomes|T:0.:0:ALFA
21	31667322	G>A,C,T	snv	1568810715	pathogenic	by-frequency;by-alfa;by-cluster	missense_variant;coding_sequence_variant	SOD1	T:0.:0:ALFA
21	31667343	G>C	snv	1568810758	uncertain-significance		missense_variant;coding_sequence_variant	SOD1
21	31667362	G>A,C,T	snv	1568810789	pathogenic	by-frequency;by-alfa;by-cluster	missense_variant;coding_sequence_variant	SOD1	A:0.0000007:1:GnomAD_exomes|T:0.0000038:1:TOPMED|T:0.:0:ALFA
21	31668487	A>C,G,T	snv	1568811366	likely-pathogenic;pathogenic;uncertain-significance	by-frequency;by-alfa;by-cluster	missense_variant;coding_sequence_variant	SOD1	T:0.000007:6:GnomAD_exomes|G:0.:0:ALFA
21	31668489	G>A,C,T	snv	1568811372	likely-pathogenic;uncertain-significance		missense_variant;coding_sequence_variant	SOD1
21	31668514	A>C,G,T	snv	1568811426	likely-pathogenic;pathogenic;uncertain-significance	by-frequency;by-cluster	missense_variant;coding_sequence_variant	SOD1	G:0.000002:1:GnomAD_exomes
21	31668525	A>G,T	snv	1568811445	likely-pathogenic;uncertain-significance	by-frequency;by-alfa;by-cluster	missense_variant;coding_sequence_variant	SOD1	T:0.000002:1:GnomAD_exomes|G:0.:0:ALFA
21	31668526	C>G,T	snv	1568811454	conflicting-interpretations-of-pathogenicity;likely-pathogenic		missense_variant;coding_sequence_variant	SOD1
21	31668529	G>A,T	snv	1568811464	uncertain-significance	by-frequency;by-alfa	missense_variant;coding_sequence_variant	SOD1	A:0.:0:ALFA
21	31668538	G>A,C,T	snv	1568811489	likely-pathogenic;pathogenic;uncertain-significance	by-frequency;by-alfa;by-cluster	missense_variant;coding_sequence_variant	SOD1	A:0.:0:ALFA
21	31668552	T>C	snv	1568811515	likely-pathogenic	by-frequency;by-alfa	missense_variant;coding_sequence_variant	SOD1	C:0.:0:ALFA
21	31668555	G>C,T	snv	1568811520	likely-pathogenic		missense_variant;coding_sequence_variant	SOD1
21	31659825	T>C	snv	1601153438	uncertain-significance		missense_variant;coding_sequence_variant	SOD1
21	31666508	G>A,T	snv	1601157750	likely-pathogenic;pathogenic	by-frequency;by-alfa;by-cluster	missense_variant;coding_sequence_variant	SOD1	T:0.:0:ALFA
21	31667353	G>A,C	snv	1601158483	pathogenic	by-frequency;by-alfa;by-cluster	missense_variant;coding_sequence_variant	SOD1	C:0.00068:2:KOREAN|A:0.:0:ALFA
21	31663814	T>C	snv	2049569572	uncertain-significance		missense_variant;2KB_upstream_variant;coding_sequence_variant;upstream_transcript_variant	SOD1;LOC124900469
21	31666484	T>C	snv	2049594204	likely-pathogenic	by-frequency	coding_sequence_variant;missense_variant	SOD1	C:0.0000007:1:GnomAD_exomes
21	31666493	C>T	snv	2049594311	likely-pathogenic		coding_sequence_variant;missense_variant	SOD1
21	31667349	C>A,G,T	snv	2049603707	uncertain-significance	by-frequency;by-alfa;by-cluster	coding_sequence_variant;missense_variant	SOD1	T:0.00004:3:TOMMO|G:0.:0:ALFA
21	31667361	G>A	snv	2049604095	likely-pathogenic		coding_sequence_variant;missense_variant	SOD1
21	31668513	G>A	snv	2049618449	likely-pathogenic	by-frequency	coding_sequence_variant;missense_variant	SOD1	A:0.000002:1:GnomAD_exomes
21	31659786	T>C	snv	2123427988	uncertain-significance		missense_variant;coding_sequence_variant	SOD1
21	31663810	G>C	snv	2123431867	uncertain-significance		upstream_transcript_variant;missense_variant;2KB_upstream_variant;coding_sequence_variant	SOD1;LOC124900469
21	31668563	T>C,G	snv	2123437030	likely-benign;likely-pathogenic	by-frequency	synonymous_variant;missense_variant;coding_sequence_variant	SOD1	C:0.000002:1:GnomAD_exomes
21	31659824	A>T	snv	2516654131	uncertain-significance		missense_variant;coding_sequence_variant	SOD1
21	31667259	C>T	snv	2516660280	likely-pathogenic		missense_variant;coding_sequence_variant	SOD1
21	31667298	G>A,C,T	snv	121912437	pathogenic;likely-pathogenic	by-frequency;by-alfa;by-cluster	coding_sequence_variant;missense_variant	SOD1	C:0.:0:PAGE_STUDY|T:0.:0:ALFA
21	31663836	C>T	snv	1804450			coding_sequence_variant;2KB_upstream_variant;missense_variant;upstream_transcript_variant	SOD1;LOC124900469
21	31663803	C>G	snv	11556621		by-frequency;by-cluster	coding_sequence_variant;2KB_upstream_variant;missense_variant;upstream_transcript_variant	SOD1;LOC124900469	G:0.0002595:1:ALSPAC|G:0.0000079:11:GnomAD_exomes|G:0.0000129:1:TOMMO|G:0.:0:TWINSUK
21	31667309	T>A,C	snv	111229903		by-frequency;by-alfa;by-cluster	coding_sequence_variant;missense_variant;synonymous_variant	SOD1	A:0.0002:1:1000Genomes|A:0.000156:1:1000Genomes_30X|C:0.000008:1:ExAC|A:0.000007:1:GnomAD_genomes|C:0.:0:ALFA
21	31659816	A>G	snv	200016533		by-frequency;by-alfa;by-cluster	coding_sequence_variant;missense_variant	SOD1	G:0.000015:21:GnomAD_exomes|G:0.0000067:1:GnomAD_genomes|G:0.0000076:2:TOPMED|G:0.000033:1:ALFA
21	31667302	T>C	snv	202198235		by-frequency;by-alfa;by-cluster	coding_sequence_variant;missense_variant	SOD1	C:0.000009:7:GnomAD_exomes|C:0.:0:ALFA
21	31668543	C>A,G,T	snv	746397967		by-frequency;by-alfa;by-cluster	coding_sequence_variant;missense_variant	SOD1	G:0.000008:1:ExAC|T:0.000008:2:TOPMED|T:0.000037:1:ALFA
21	31663794	G>A,C	snv	747214897		by-frequency;by-cluster	2KB_upstream_variant;coding_sequence_variant;upstream_transcript_variant;missense_variant	SOD1;LOC124900469	A:0.:0:GnomAD_exomes
21	31663856	C>G,T	snv	748897491		by-frequency;by-cluster	2KB_upstream_variant;coding_sequence_variant;upstream_transcript_variant;missense_variant	SOD1;LOC124900469	T:0.000008:1:ExAC
21	31663869	T>G	snv	759149157		by-frequency;by-cluster	2KB_upstream_variant;coding_sequence_variant;upstream_transcript_variant;missense_variant	SOD1;LOC124900469	G:0.000008:1:ExAC|G:0.000008:5:GnomAD_exomes
21	31667316	A>G	snv	760740095		by-frequency;by-alfa;by-cluster	coding_sequence_variant;missense_variant	SOD1	G:0.0000082:1:ExAC|G:0.0000093:13:GnomAD_exomes|G:0.0000129:1:TOMMO|G:0.0000151:4:TOPMED|G:0.0000268:1:ALFA
21	31667348	C>A,G	snv	761014216		by-frequency;by-cluster	coding_sequence_variant;missense_variant	SOD1	G:0.000001:1:GnomAD_exomes|G:0.000684:2:KOREAN|A:0.000026:2:TOMMO
21	31663866	A>T	snv	770404622		by-frequency;by-cluster	2KB_upstream_variant;coding_sequence_variant;upstream_transcript_variant;missense_variant	SOD1;LOC124900469	T:0.000008:1:ExAC
21	31663821	G>A,C,T	snv	777560607		by-frequency;by-alfa;by-cluster	coding_sequence_variant;missense_variant;2KB_upstream_variant;upstream_transcript_variant	SOD1;LOC124900469	T:0.000008:1:ExAC|C:0.000002:1:GnomAD_exomes|T:0.000007:1:GnomAD_genomes|A:0.000342:1:KOREAN|T:0.000011:3:TOPMED|T:0.:0:ALFA
21	31666485	C>A,T	snv	778327622		by-frequency;by-cluster	coding_sequence_variant;missense_variant	SOD1	T:0.000018:2:ExAC
21	31668520	C>T	snv	781031581		by-frequency;by-alfa;by-cluster	coding_sequence_variant;missense_variant	SOD1	T:0.0000082:1:ExAC|T:0.00003:42:GnomAD_exomes|T:0.0000134:2:GnomAD_genomes|T:0.0000151:4:TOPMED|T:0.0001423:2:ALFA
21	31667325	T>A,C,G	snv	936838632		by-frequency;by-cluster	missense_variant;coding_sequence_variant	SOD1	A:0.000009:7:GnomAD_exomes|C:0.000342:1:KOREAN
21	31667332	T>C	snv	957386804		by-frequency;by-alfa;by-cluster	missense_variant;coding_sequence_variant	SOD1	C:0.000001:1:GnomAD_exomes|C:0.000004:1:TOPMED|C:0.:0:ALFA
21	31663881	C>G,T	snv	986277034		by-cluster	upstream_transcript_variant;2KB_upstream_variant;coding_sequence_variant;missense_variant	SOD1;LOC124900469
21	31668505	G>A	snv	1169621300		by-frequency;by-alfa;by-cluster	missense_variant;coding_sequence_variant	SOD1	A:0.0000043:6:GnomAD_exomes|A:0.0000067:1:GnomAD_genomes|A:0.0000038:1:TOPMED|A:0.:0:ALFA
21	31659826	C>G,T	snv	1182088847		by-frequency;by-cluster	missense_variant;synonymous_variant;coding_sequence_variant	SOD1	T:0.0014:4:KOREAN
21	31668541	G>A	snv	1200970313		by-frequency;by-cluster	missense_variant;coding_sequence_variant	SOD1	A:0.000002:1:GnomAD_exomes
21	31668534	G>A,C	snv	1217353001		by-cluster	missense_variant;coding_sequence_variant	SOD1
21	31659797	A>C	snv	1236713490		by-frequency;by-alfa;by-cluster	missense_variant;coding_sequence_variant	SOD1	C:0.000007:1:GnomAD_genomes|C:0.000004:1:TOPMED|C:0.:0:ALFA
21	31667291	C>G	snv	1256439749			missense_variant;coding_sequence_variant	SOD1
21	31659774	C>T	snv	1297567794		by-frequency;by-cluster	coding_sequence_variant;missense_variant	SOD1	T:0.0000007:1:GnomAD_exomes
21	31667357	C>G,T	snv	1299542356		by-frequency;by-cluster	coding_sequence_variant;synonymous_variant;missense_variant	SOD1	T:0.0000007:1:GnomAD_exomes
21	31667289	G>A	snv	1343616996		by-frequency;by-cluster	coding_sequence_variant;missense_variant	SOD1	A:0.000003:2:GnomAD_exomes
21	31667292	A>G	snv	1345907062		by-frequency;by-cluster	missense_variant;coding_sequence_variant	SOD1	G:0.0000029:4:GnomAD_exomes
21	31666478	C>G,T	snv	1356474292		by-frequency;by-alfa;by-cluster	missense_variant;coding_sequence_variant	SOD1	T:0.:0:ALFA
21	31667344	G>A,T	snv	1359299834		by-frequency;by-alfa;by-cluster	missense_variant;coding_sequence_variant	SOD1	A:0.000002:1:GnomAD_exomes|A:0.000004:1:TOPMED|T:0.:0:ALFA
21	31666461	C>A,T	snv	1378635853		by-cluster	missense_variant;coding_sequence_variant	SOD1
21	31659807	G>A,C	snv	1379845624		by-frequency;by-alfa;by-cluster	missense_variant;coding_sequence_variant	SOD1	A:0.000002:1:GnomAD_exomes|A:0.000004:1:TOPMED|A:0.:0:ALFA
21	31659791	G>A	snv	1380854315		by-frequency;by-cluster	missense_variant;coding_sequence_variant	SOD1	A:0.0000014:2:GnomAD_exomes
21	31663855	C>G,T	snv	1421563256		by-cluster	coding_sequence_variant;missense_variant;2KB_upstream_variant;upstream_transcript_variant;synonymous_variant	SOD1;LOC124900469
21	31666481	C>G,T	snv	1422670461		by-frequency;by-alfa;by-cluster	coding_sequence_variant;synonymous_variant;missense_variant	SOD1	G:0.000002:1:GnomAD_exomes|T:0.000007:1:GnomAD_genomes|T:0.000004:1:TOPMED|T:0.:0:ALFA
21	31668508	A>G	snv	1447747586		by-frequency;by-alfa;by-cluster	coding_sequence_variant;missense_variant	SOD1	G:0.000018:11:GnomAD_exomes|G:0.000013:2:GnomAD_genomes|G:0.:0:ALFA
21	31659821	A>G	snv	1460554436		by-frequency;by-cluster	missense_variant;coding_sequence_variant	SOD1	G:0.000002:1:GnomAD_exomes|G:0.001031:3:KOREAN
21	31659801	G>C,T	snv	1555836167		by-cluster	missense_variant;coding_sequence_variant	SOD1
21	31663830	G>T	snv	1555836517			upstream_transcript_variant;missense_variant;coding_sequence_variant;2KB_upstream_variant	SOD1;LOC124900469
21	31663859	G>A,T	snv	1555836523		by-frequency;by-alfa	upstream_transcript_variant;missense_variant;coding_sequence_variant;2KB_upstream_variant	SOD1;LOC124900469	A:0.:0:ALFA
21	31667268	G>A	snv	1555836789			missense_variant;coding_sequence_variant	SOD1
21	31667277	A>G	snv	1555836792			missense_variant;coding_sequence_variant	SOD1
21	31667279	T>A,C	snv	1555836793		by-frequency;by-alfa;by-cluster	missense_variant;coding_sequence_variant;synonymous_variant	SOD1	C:0.0000021:3:GnomAD_exomes|C:0.:0:ALFA
21	31668478	A>G	snv	1555836922		by-frequency;by-cluster	missense_variant;coding_sequence_variant	SOD1	G:0.0000014:2:GnomAD_exomes
21	31668516	A>C,G	snv	1555836932		by-frequency;by-cluster	missense_variant;coding_sequence_variant	SOD1	C:0.000002:1:GnomAD_exomes
21	31668522	A>C,T	snv	1555836934		by-frequency;by-cluster	stop_gained;missense_variant;coding_sequence_variant	SOD1	C:0.000001:1:GnomAD_exomes
21	31659792	T>A	snv	1568807330			missense_variant;coding_sequence_variant	SOD1
21	31659800	G>A,C	snv	1568807350		by-frequency;by-cluster	missense_variant;coding_sequence_variant	SOD1	A:0.000002:1:GnomAD_exomes
21	31659804	A>C,G	snv	1568807374		by-frequency;by-alfa;by-cluster	missense_variant;coding_sequence_variant	SOD1	G:0.000002:1:GnomAD_exomes|C:0.:0:ALFA
21	31659834	A>G	snv	1568807435		by-frequency;by-alfa	missense_variant;coding_sequence_variant	SOD1	G:0.:0:ALFA
21	31663806	T>C	snv	1568809118		by-frequency;by-alfa	upstream_transcript_variant;missense_variant;coding_sequence_variant;2KB_upstream_variant	SOD1;LOC124900469	C:0.:0:ALFA
21	31663864	T>C,G	snv	1568809175		by-frequency;by-alfa;by-cluster	upstream_transcript_variant;coding_sequence_variant;missense_variant;synonymous_variant;2KB_upstream_variant	SOD1;LOC124900469	C:0.000002:1:GnomAD_exomes|G:0.:0:ALFA
21	31666451	T>C	snv	1568810255		by-frequency;by-alfa;by-cluster	missense_variant;coding_sequence_variant	SOD1	C:0.000004:1:TOPMED|C:0.:0:ALFA
21	31666463	G>C	snv	1568810268			missense_variant;coding_sequence_variant	SOD1
21	31666479	C>G,T	snv	1568810284		by-frequency;by-alfa	missense_variant;coding_sequence_variant	SOD1	T:0.:0:ALFA
[truncated: 51 more rows]

## Sheet: SOD1_Filtered
#chr	pos	variation	variant_type	snp_id	clinical_significance	validation_status	function_class	gene	frequency
[truncated: 7 more rows]

[truncated: 3 more sheets: TARDBP_Variants, TARDBP_Missense, TARDBP_Filtered]
