# Supplementary material
Source: Research Square preprint supplement (doi:10.21203/rs.3.rs-8978267/v1)
Supplement: Supplementary file 1 [file ce19889d9aa0061a97cf8604.docx]

***In silico* Evaluation of Deleterious nsSNPs in *SOD1* and *TARDBP* Genes Associated with Amyotrophic Lateral Sclerosis**

**Manjunath B. Malshetty1#, Sandeep Mallya1#, Sudharshan Prabhu2***

1 Department of Bioinformatics, Manipal School of Life Sciences, Manipal Academy of Higher Education, Manipal, Karnataka-576104

2 Department of Cellular and Molecular Biology, Manipal School of Life Sciences, Manipal Academy of Higher Education, Manipal, Karnataka-576104

**# Equal Contribution
Corresponding Author**

**Dr Sudharshan Prabhu,**

Assistant Professor,

Department of Cell and Molecular Biology,

Manipal School of Life Sciences,

Manipal Academy of Higher Education,

Manipal, Karnataka-576104,

[sudharshan.prabhu@manipal.edu](mailto:sudharshan.prabhu@manipal.edu)

**SUPPLEMENTARY DATA**

**FIGURES**


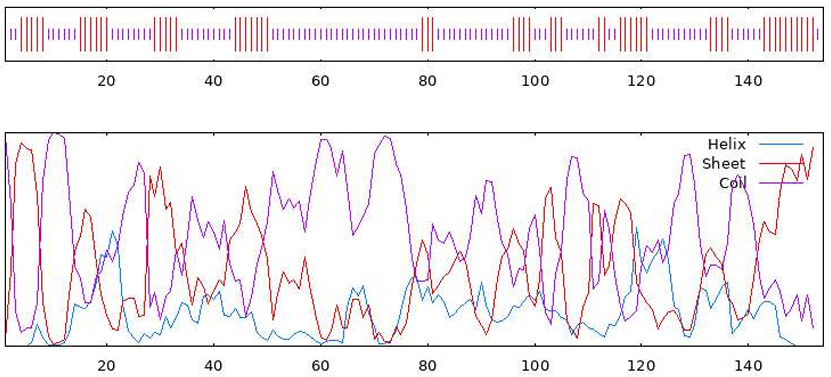


**A**


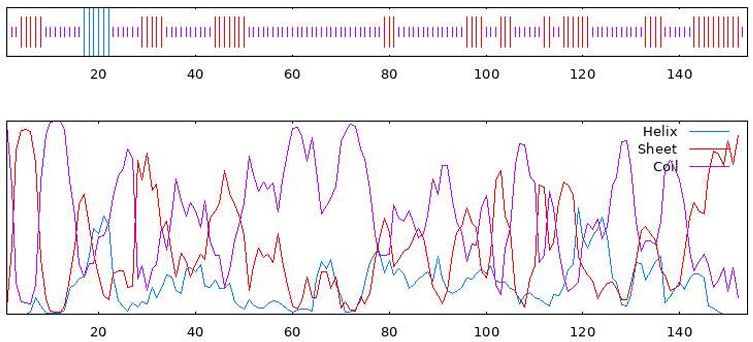


**C**


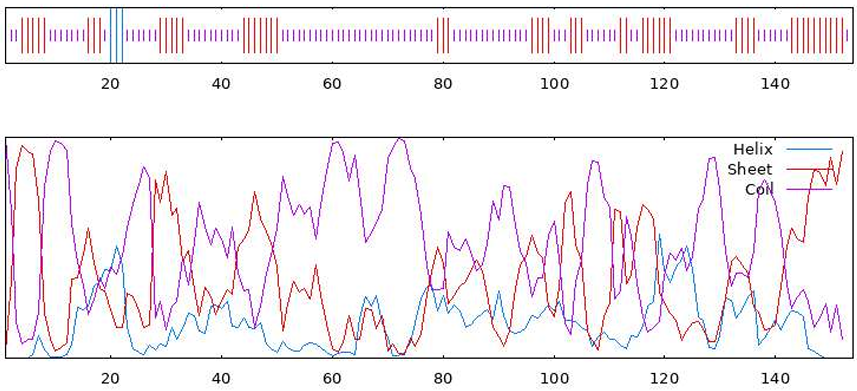


**B**

**D**

**E**

**F**


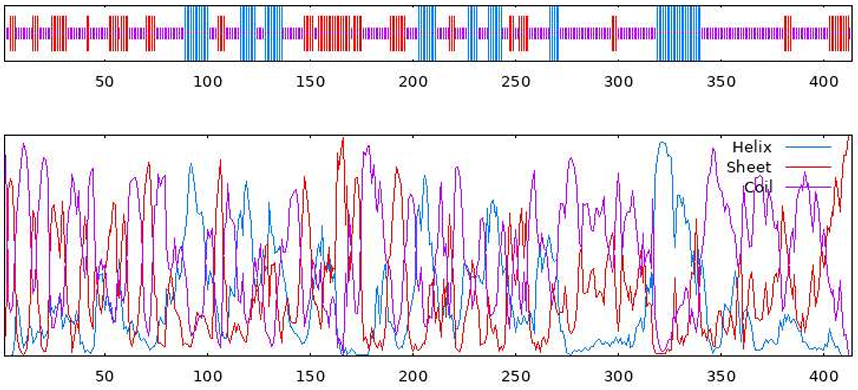

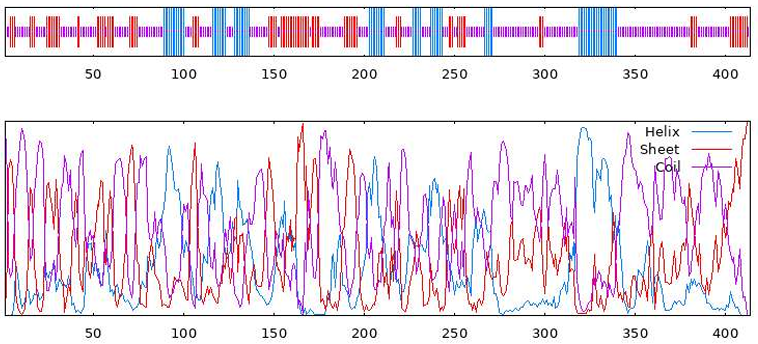

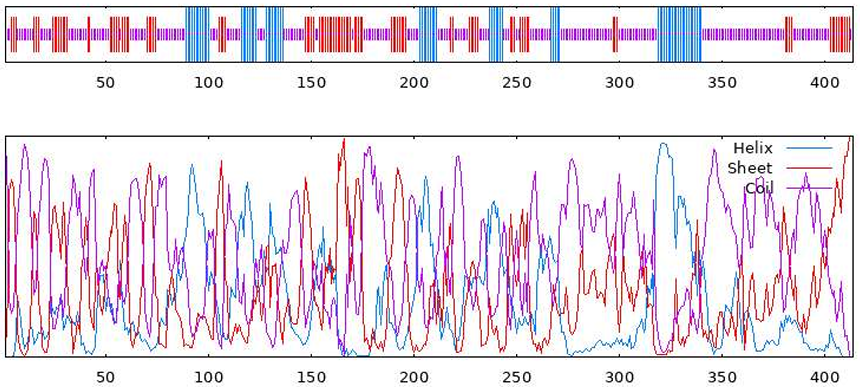


**Figure S1.** Secondary structure prediction of SOD1 and TARDBP using GOR4-based secondary structure profiles of wild-type and ALS-associated variants, illustrating residue-wise distributions of α-helix, β-sheet (extended strand), and random coil conformations. (A) SOD1 Wild Type, (B) SOD1_V15G (rs1202989817), and (C) SOD1_I19M (rs1182088847) (D) TARDBP Wild Type, (E) TARDBP_G335D (rs80356729), and (F) TARDBP_I222T (rs1570722030)


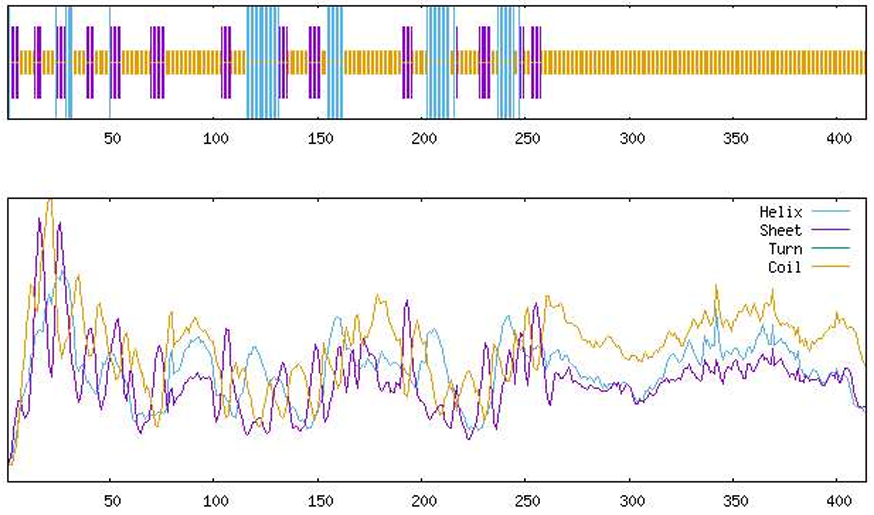


**D**


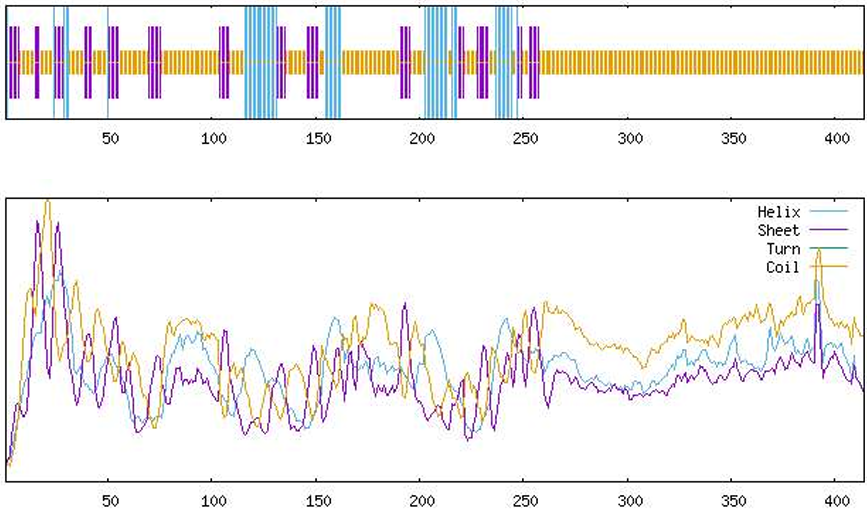


**E**


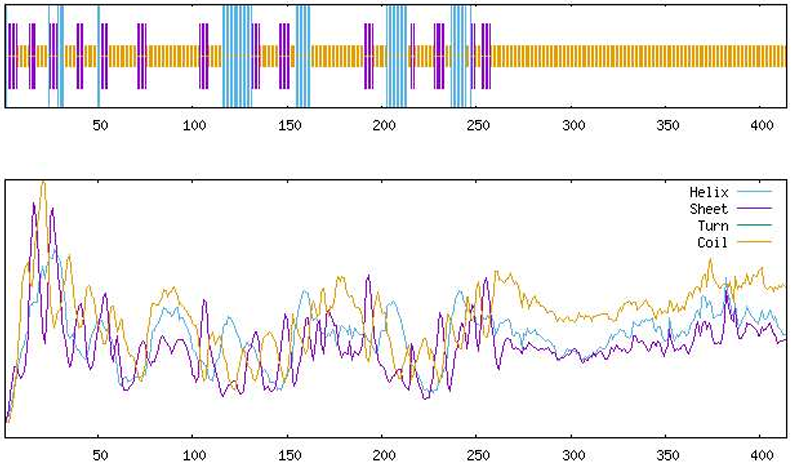


**F**


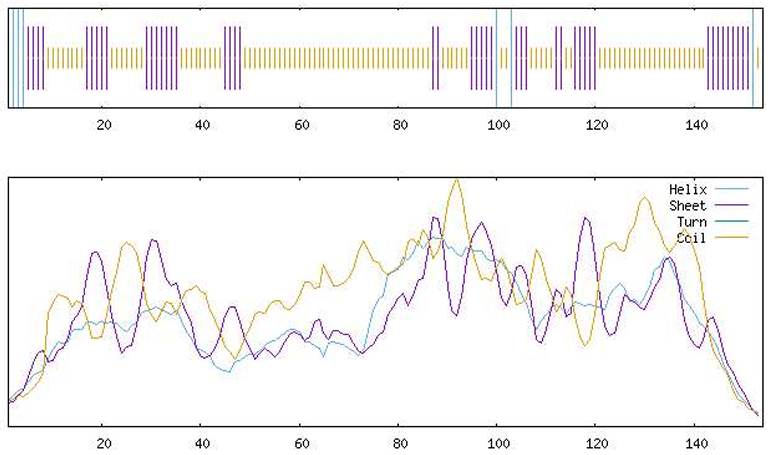


**A**


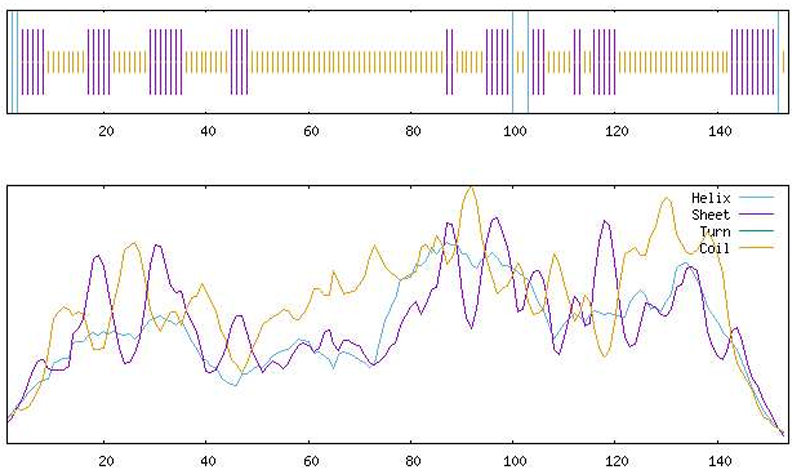


**B**


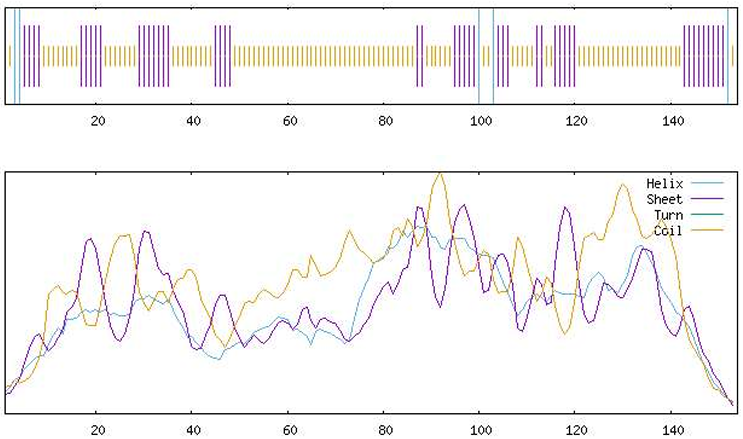


**C**

**Figure S2.** Secondary structure prediction of SOD1 and TARDBP using SOPMA-based secondary structure profiles. Residue-wise distributions of α-helix, β-sheet (extended strand), turn, and random coil are shown for (A) SOD1 Wild Type, (B) SOD1_V15G(rs1202989817), (C) SOD1_I19M(rs1182088847), (D) TARDBP Wild Type, (E) TARDBP_G335D(rs80356729), and (F) TARDBP_I222T(rs1570722030).

A

B


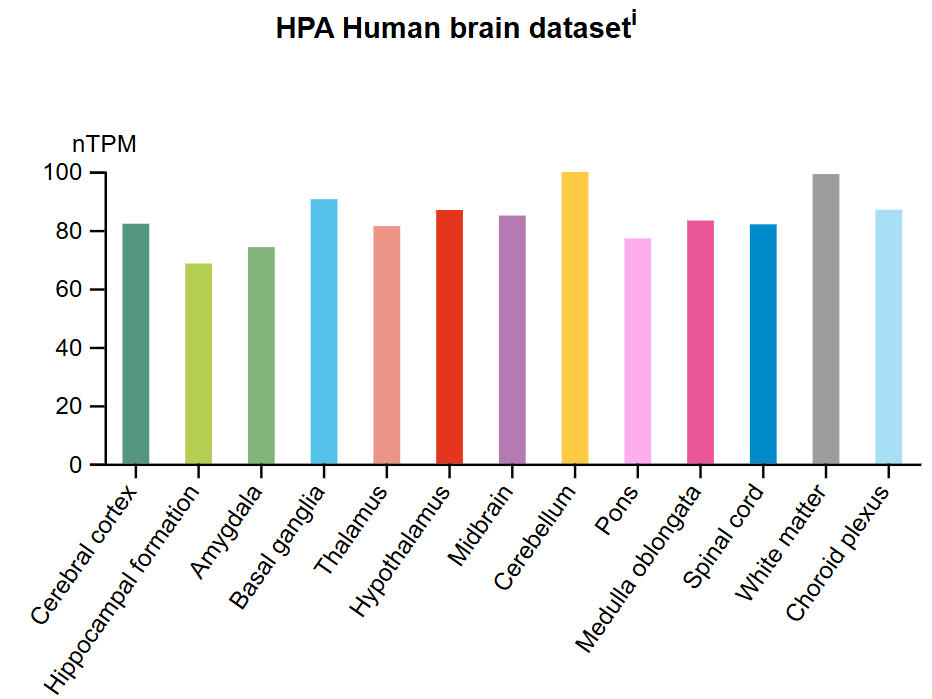

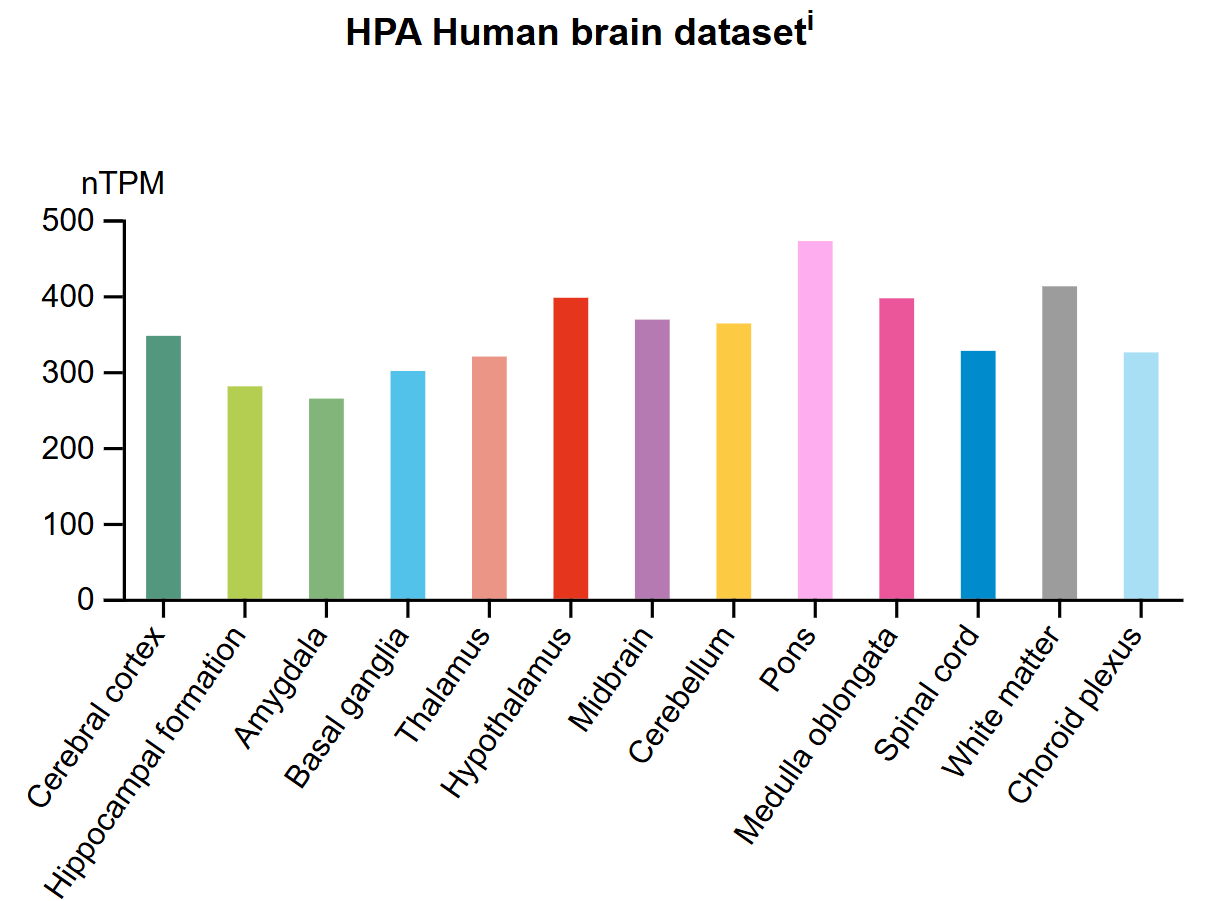


**Figure S3.** Transcript expression profile of *SOD1* and *TARDBP* across human brain regions.(A)RNA expression of *SOD1* across major brain regions from the HPA brain RNA-seq dataset. *SOD1* shows broad and relatively high expression in the cerebral cortex, hippocampal formation, thalamus, hypothalamus, and cerebellum. (B) RNA expression levels of *TARDBP* across the same brain regions. *TARDBP* exhibits a similar widespread pattern, with relatively higher expression in cortical areas, the hippocampal formation, and the cerebellum


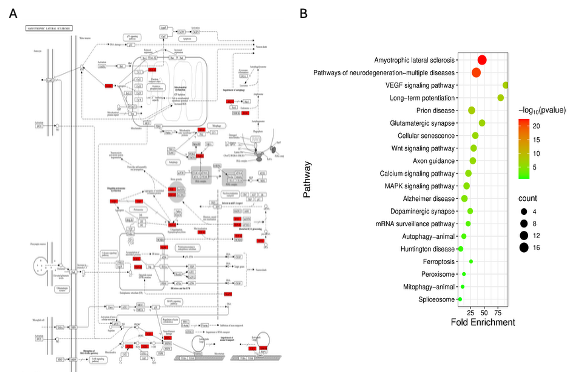


**Figure S4. KEGG pathway mapping and enrichment of ALS-associated genes from the SOD1–TARDBP network.** (A) KEGG ALS pathway map generated using ShinyGO, with study-identified genes highlighted in red, including SOD1, TARDBP, FUS, VCP, OPTN, CHCHD10, NEK1, C9orf72, and STRING-derived interactors.(B) KEGG pathway enrichment dot plot showing fold enrichment (x-axis), gene count (dot size), and –log10(p-value) (color scale), highlighting significant pathways such as ALS, neurodegeneration-related pathways, VEGF signaling, and ferroptosis.


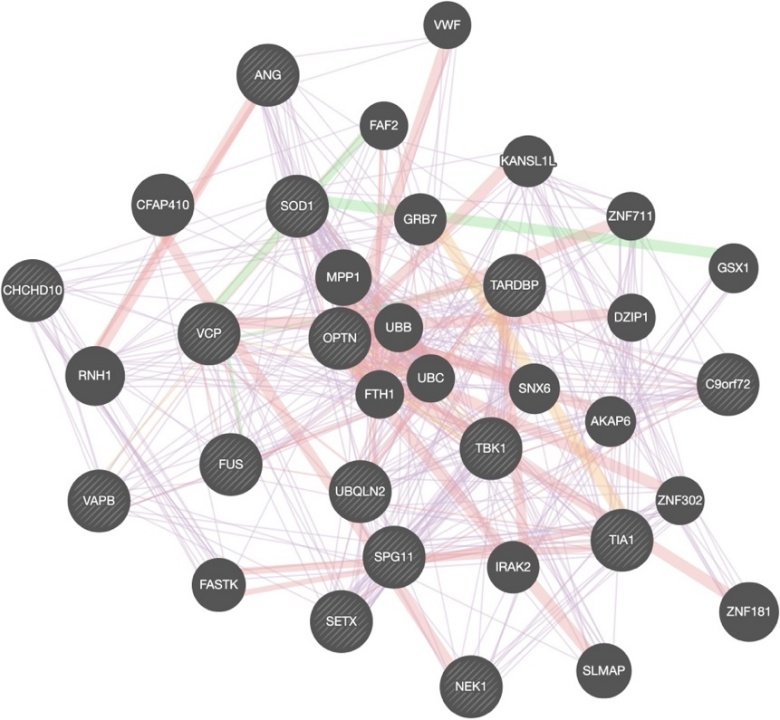


**Figure S5.** **Gene-gene interaction network of *SOD1* and *TARDBP* with ALS-associated genes generated using Gene MANIA.** The network illustrates predicted functional relationships between *SOD1, TARDBP,* and other amyotrophic lateral sclerosis (ALS)-associated genes identified from the literature. Nodes represent individual genes; the striped nodes indicate the query genes (*SOD1* and T*ARDBP*). Edges denote functional associations integrated from Gene MANIA, including co-expression (purple), physical interactions (red), pathway connections (orange), co-localization (yellow), genetic interactions (green), and shared protein domains (light blue). Node size is proportional to Gene Mania’s relevance score, reflecting each gene’s contribution to the network prediction model. This network highlights central hubs such as *OPTN, VCP, FUS, TBK1, UBQLN2,* and *C9orf72,* showing strong functional connectivity with *SOD1* and *TARDBP*.

**TABLES**

**Table S1:** Comprehensive dataset of nsSNPs in *SOD1* and *TARDBP* genes retained following systematic inclusion and exclusion filtering criteria.*(Provided as a separate Excel file containing detailed variant information and filtering status).*

**Table S2.** Allele-specific ClinVar clinical annotation of prioritized *SOD1* and *TARDBP* variants.

| Gene | rsID | Ref > Alt | Protein change | ClinVar clinical significance | Associated condition(s) |
| --- | --- | --- | --- | --- | --- |
| *SOD1* | rs1202989817 | T > G | p.Val15Gly | Likely pathogenic | ALS |
| rs1202989817 | T > C | – | Not reported | – |
| rs1182088847 | C > G | – | Not reported | – |
| *TARDBP* | rs1228733743 | T > C | – | Not reported | – |
| rs1228733743 | T > G | – | Not reported | – |
| rs80356715 | C > G | – | Not reported | – |
| rs80356715 | C > T | – | Not reported | – |
| rs1570722030 | T > C | – | Not reported | – |
| rs80356729 | G > A | – | Conflicting interpretations of pathogenicity | ALS |

**Table S3:** Phosphorylation site conservation analysis for SOD1 and TARDBP.

| Gene | Sequence Type | Position | Residue | Kinase | Score | Status |
| --- | --- | --- | --- | --- | --- | --- |
| *SOD1* | Wild-type/variants rs1202989817(V15G)  rs1182088847(I19M) | 60 | S | CK1 | 0.1024 | Conserved |
| 3 | T | TKL | 0.6789 | Conserved |
| 59 | T | CK1 | 0.0690 | Conserved |
| 60 | S | CK1 | 0.1024 | Conserved |
| 89 | T | CK1 | 0.0698 | Conserved |
| 60 | S | CK1 | 0.1024 | Conserved |
| *TARDBP* | Wild-type/variants rs80356729(G335D)  rs1570722030(I222T) | 92 | S | CK1 | 0.4387 | Conserved |
| 183 | S | CK1 | 0.3848 | Conserved |
| 258 | S | CK1 | 0.1001 | Conserved |
| 273 | S | CK1 | 0.5974 | Conserved |
| 305 | S | CK1 | 0.2810 | Conserved |
| 317 | S | CK1 | 0.1308 | Conserved |
| 393 | S | CK1 | 0.4689 | Conserved |
| 395 | S | CK1 | 0.3442 | Conserved |
| 403 | S | CK1 | 0.5365 | Conserved |
| 404 | S | CK1 | 0.1085 | Conserved |
| 407 | S | CK1 | 0.2373 | Conserved |
| 409 | S | CK1 | 0.1674 | Conserved |
| 4 | Y | TK | 0.9951 | Conserved |
| 73 | Y | TK | 0.9093 | Conserved |
| 123 | Y | TK | 0.9397 | Conserved |
| 374 | Y | TK | 0.9042 | Conserved |
| 92 | S | CK1 | 0.4387 | Conserved |
| 183 | S | CK1 | 0.3848 | Conserved |
| 258 | S | CK1 | 0.1001 | Conserved |
| 273 | S | CK1 | 0.5974 | Conserved |
| 305 | S | CK1 | 0.2810 | Conserved |
| 317 | S | CK1 | 0.1308 | Conserved |
| 393 | S | CK1 | 0.4689 | Conserved |
| 395 | S | CK1 | 0.3442 | Conserved |
| 403 | S | CK1 | 0.5365 | Conserved |
| 404 | S | CK1 | 0.1085 | Conserved |
| 407 | S | CK1 | 0.2373 | Conserved |
| 409 | S | CK1 | 0.1674 | Conserved |
| 4 | Y | TK | 0.9951 | Conserved |
| 73 | Y | TK | 0.9093 | Conserved |
| 123 | Y | TK | 0.9397 | Conserved |
| 374 | Y | TK | 0.9042 | Conserved |
| 92 | S | CK1 | 0.4387 | Conserved |
| 183 | S | CK1 | 0.3848 | Conserved |
| 258 | S | CK1 | 0.1001 | Conserved |
| 273 | S | CK1 | 0.5974 | Conserved |
| 305 | S | CK1 | 0.2487 | Conserved |
| 317 | S | CK1 | 0.2124 | Conserved |
| 393 | S | CK1 | 0.4689 | Conserved |
| 395 | S | CK1 | 0.3442 | Conserved |
| 403 | S | CK1 | 0.5365 | Conserved |
| 404 | S | CK1 | 0.1085 | Conserved |
| 407 | S | CK1 | 0.2373 | Conserved |
| 409 | S | CK1 | 0.1674 | Conserved |
| 4 | Y | TK | 0.9951 | Conserved |
| 73 | Y | TK | 0.9093 | Conserved |
| 123 | Y | TK | 0.9397 | Conserved |
| 374 | Y | TK | 0.9042 | Conserved |

**Table S4:** Ramachandran plot validation metrics for SOD1 and TARDBP mutant protein structures.

| Gene | rsID | Mutations | MolProbity score | Clash score | Ramachandran favored (%) | Ramachandran outliers (%) |
| --- | --- | --- | --- | --- | --- | --- |
| *SOD1* | rs1202989817 | V15G | 0.62 | 0.00 | 97.37 | 0.00 |
| rs1182088847 | I19M | 0.71 | 0.00 | 96.71 | 0.00 |
| *TARDBP* | rs80356729 | G335D | 1.73 | 0.16 | 74.03 | 12.62 |
| rs1570722030 | I222T | 1.76 | 0.16 | 74.27 | 12.38 |

**Table S5.** Network Topology Parameters of *SOD1-TARDBP* Cytoscape Interaction Network.

| **Gene** | **Target gene** | **Avg. Shortest Path Length** | **Clustering Coefficient** | **Closeness Centrality** | **Betweenness Centrality** | **Degree** |
| --- | --- | --- | --- | --- | --- | --- |
| ***TARDBP*** | ***TARDBP*** | 1.048 | 0.389 | 0.955 | 0.303 | 20.000 |
| ***SOD1*** | ***SOD1*** | 1.095 | 0.427 | 0.913 | 0.227 | 19.000 |
| ***C9orf72*** | ***C9orf72*** | 1.333 | 0.648 | 0.750 | 0.041 | 14.000 |
| ***FUS*** | ***FUS*** | 1.333 | 0.648 | 0.750 | 0.041 | 14.000 |
| ***NEFH*** | ***NEFH*** | 1.429 | 0.758 | 0.700 | 0.034 | 12.000 |
| ***SETX*** | ***SETX*** | 1.476 | 0.891 | 0.677 | 0.006 | 11.000 |
| ***ALS2*** | ***ALS2*** | 1.524 | 1.000 | 0.656 | 0.000 | 10.000 |
| ***DCTN1*** | ***DCTN1*** | 1.524 | 1.000 | 0.656 | 0.000 | 10.000 |
| ***FIG4*** | ***FIG4*** | 1.524 | 1.000 | 0.656 | 0.000 | 10.000 |
| ***OPTN*** | ***OPTN*** | 1.524 | 1.000 | 0.656 | 0.000 | 10.000 |
| ***VAPB*** | ***VAPB*** | 1.524 | 1.000 | 0.656 | 0.000 | 10.000 |
| ***NEFL*** | ***NEFL*** | 1.714 | 0.933 | 0.583 | 0.001 | 6.000 |
| ***PPP3CA*** | ***PPP3CA*** | 1.714 | 1.000 | 0.583 | 0.000 | 6.000 |
| ***PPP3CB*** | ***PPP3CB*** | 1.714 | 1.000 | 0.583 | 0.000 | 6.000 |
| ***PPP3CC*** | ***PPP3CC*** | 1.714 | 1.000 | 0.583 | 0.000 | 6.000 |
| ***PPP3R1*** | ***PPP3R1*** | 1.714 | 1.000 | 0.583 | 0.000 | 6.000 |
| ***PPP3R2*** | ***PPP3R2*** | 1.714 | 1.000 | 0.583 | 0.000 | 6.000 |
| ***PRNP*** | ***PRNP*** | 1.762 | 1.000 | 0.568 | 0.000 | 5.000 |
| ***SMN1*** | ***SMN1*** | 1.762 | 1.000 | 0.568 | 0.000 | 5.000 |
| ***TMEM106B*** | ***TMEM106B*** | 1.905 | 1.000 | 0.525 | 0.000 | 3.000 |
| ***RNF19A*** | ***RNF19A*** | 2.000 | 1.000 | 0.500 | 0.000 | 2.000 |
| ***GSC*** | ***GSC*** | 2.000 | 0.000 | 0.500 | 0.000 | 1.000 |

**Table S6.** Key Hub Genes Identified in the *SOD1-TARDBP* GeneMANIA Network.

| Gene | Approx. Network Importance | Key Role |
| --- | --- | --- |
| *UBB / UBC* | Highest density | Ubiquitin-proteasome regulation |
| *OPTN* | Major hub | Autophagy & innate immunity |
| *VCP* | High connectivity | Protein degradation & ER stress |
| *TBK1* | High signaling hub | Autophagy & inflammatory signaling |
| *TARDBP* | Central node | RNA metabolism |
| *SOD1* | Connected to oxidative stress modules | ROS detoxification |

**Table S7.** Functional modules enriched within the SOD1-TARDBP GeneMANIA interaction network.

| Functional Category | Genes Involved | Biological Meaning |
| --- | --- | --- |
| Autophagy & protein degradation | *OPTN, TBK1, VCP, UBQLN2* | Clearance of misfolded proteins |
| RNA processing & splicing | *TARDBP, FUS, SETX, TIA1* | Disturbed RNA homeostasis |
| Oxidative stress response | *SOD1, FTH1* | ROS imbalance |
| Vesicle trafficking | *VAPB, GRB7* | ER stress & axonal transport |
| Mitochondrial organization | *CHCHD10, NEK1* | Bioenergetic dysfunction |

**Table S8.** Key Hub Genes Identified in the GeneMANIA *SOD1-TARDBP* Interaction Network

| Gene | Weighted Score | Primary Functional Category |
| --- | --- | --- |
| *C9orf72* | 0.756 | Autophagy regulation, vesicle trafficking |
| *NEK1* | 0.727 | DNA damage response, microtubule stability |
| *CHCHD10* | 0.697 | Mitochondrial cristae organization |
| *VAPB* | 0.671 | Vesicle trafficking, ER-mitochondria contact sites |
| *SETX* | 0.669 | DNA/RNA helicase activity, genome maintenance |
| *SPG11* | 0.652 | Lysosomal function, autophagy |
| *TARDBP* | 0.646 | RNA metabolism, transcriptional regulation |
| *TIA1* | 0.634 | Stress granule formation |
| *VCP* | 0.588 | DNA repair, autophagy, protein degradation |
| *ANG* | 0.587 | Protein kinase activity, angiogenesis |
| *FUS* | 0.551 | RNA binding, DNA repair |
| *OPTN* | 0.525 | Autophagy, TBK1 signaling |
| *TBK1* | 0.517 | Autophagy, innate immune signaling |
| *SOD1* | 0.51 | Oxidative stress response |
| *UBQLN2* | 0.508 | Protein quality control, proteasomal degradation |
| *SNX6* | 0.49* | Co-expression network partner (lower score) |
| *IRAK2* | 0.48* | Innate immune signaling (lower score) |

*Lower score interaction partners are still included due to relevance to ALS pathways.
